# Supplementary material for: Organocatalytic difluorobenzylation of 1,2-diketones via mild cleavage of carbon–carbon bonds
Source: Royal Society of Chemistry journal article supplement (doi:10.1039/d1qo01645h), 2021-12-16

[*Supporting Information*]

**Organocatalytic Difluorobenylation of 1,2-Diketones via  
Mild Cleavage of Carbon-Carbon Bonds**

Yong Zhang,<sup>a\*</sup> Guo-Wei Lai,<sup>a</sup> Long-Jun Nie,<sup>a</sup> Qifang He,<sup>a</sup> Mei-Juan Lin,<sup>a</sup> Rong Chi,<sup>a</sup>  
Dong-Liang Lu<sup>a\*</sup> and Xiaolin Fan<sup>a\*</sup>

**Table of Contents**

|                                                                                                 |    |
|-------------------------------------------------------------------------------------------------|----|
| <b>General information</b>                                                                      | 1  |
| <b>Synthesis of <math>\alpha</math>-aryl-<math>\alpha,\alpha</math>-difluoroacetophenone 1a</b> | 2  |
| <b>Representative procedure for the difluorobenylation reaction</b>                             | 3  |
| <b>Characterization data of products</b>                                                        | 3  |
| <b>Control reactions</b>                                                                        | 18 |
| <b>Gram-scale synthesis of 3q</b>                                                               | 19 |
| <b>Transformations of 3q</b>                                                                    | 19 |
| <b>Single crystal data</b>                                                                      | 23 |
| <b>NMR spectrum</b>                                                                             | 26 |

## General information

Visualization on TLC was achieved by use of UV light (254 nm). NMR spectra were recorded on Bruker Avance-400 spectrometer ( $^1\text{H}$  400 MHz,  $^{13}\text{C}$  101 MHz and  $^{19}\text{F}$  376 MHz) in  $\text{CDCl}_3$  or  $\text{DMSO-d}_6$  with tetramethylsilane (TMS) as internal standard. Chemical shifts are reported in per million (ppm,  $\delta$ ) and coupling constants  $J$  are given in Hertz (Hz). Data for  $^1\text{H}$  NMR are recorded as follows: chemical shift ( $\delta$ , ppm), multiplicity (s, singlet; d, doublet; t, triplet; q, quartet; m, multiplet), coupling constant (Hz), integration. Data for  $^{13}\text{C}$  NMR and  $^{19}\text{F}$  NMR MHz are reported in terms of chemical shift ( $\delta$ , ppm). High resolution mass spectroscopy (HRMS) analysis were performed at Waters G2-Xs QToF and Thermo Scientific LTQ-Orbitrap XL. Unless otherwise noted, all analytical grade solvents and commercially available reagents were used without further purification. *N*-protected isatins were prepared according to the literature procedures.<sup>1-3</sup>

## References

1. Y. C. Lee, S. S. Patil, C. Golz, C. Strohmman, S. Ziegler, K. Kumar and H. Waldmann, A ligand-directed divergent catalytic approach to establish structural and functional scaffold diversity, *Nat. Commun.*, **2017**, *8*, 14043.
2. K. Dhara, T. Mandal, I. Das and J. Dash, Synthesis of Carbazole Alkaloids by Ring-Closing Metathesis and Ring Rearrangement–Aromatization, *Angew. Chem. Int. Ed.*, **2015**, *54*, 15831.
3. H. H. Ji, Y. Z. Zhu, Y. Shao, J. Liu, Y. Yuan and X. D. Jia, Active  $\text{sp}^3$ – $\text{sp}^2$  Consecutive C–H Functionalization of *N*-Arylglycine Amides: Construction of Isatins, *J. Org. Chem.*, **2017**, *82*, 9859.

## Synthesis of $\alpha$ -aryl- $\alpha,\alpha$ -difluoroisoxazolacetophenone 1a

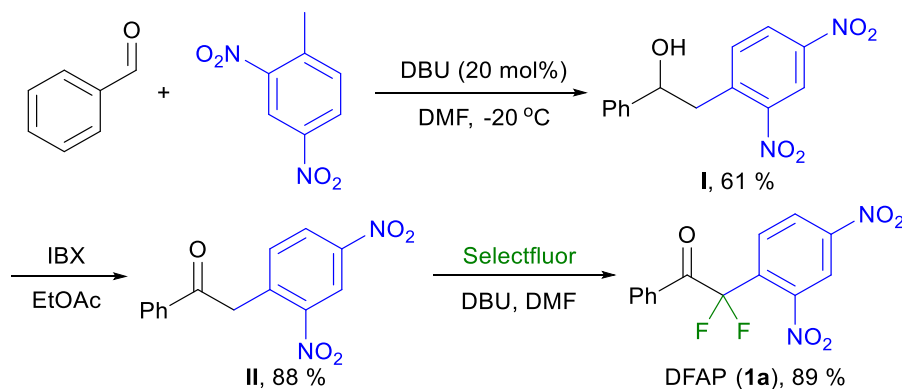

2,4-dinitrotoluene (1.82 g, 10.0 mmol), aldehyde (1.59 g, 15.0 mmol) and anhydrous DMF (10 mL) were mixed in a dry flask under  $\text{N}_2$  atmosphere, and then

cooled to -20 °C, DBU (300  $\mu$ L, 20 mol %) was injected and the mixture were stirred for 48 h under -20 °C. After the reaction was completed, the mixture was poured into water (40 mL) and extracted with ethyl acetate (20 mL x 5). The combined extracts were washed with water (40 mL) and brine (40 mL), dried over Na<sub>2</sub>SO<sub>4</sub> and concentrated in vacuo. The crude products were purified by silica gel column chromatography using PE/EA (v/v = 10/1) as eluents to afford 1.76 g of **I** (61 % yield).

To the solution of **I** (1.76 g, 6.1 mmol) in EtOAc (20 mL), *o*-iodoxybenzoic acid (IBX) (3.42 g, 12.2 mmol) was added and the mixture was refluxed at 80 °C (oil bath) for 10 h. After the reaction was completed (monitored by TLC), it was cooled to room temperature and filtered. The filtrate was concentrated and recrystallized from ethanol to give 1.55 g of **II** (88% yield).

To the mixture of **II** (1.55 g, 5.37 mmol), DBU (1.77 mL, 2.2 equiv) and 30 mL of anhydrous DMF, selectfluor (4.18 g, 11.80 mmol) was added and the mixture was stirred at room temperature for 2 h. After the reaction was completed (monitored by TLC), it was filtered and washed several times with dichloromethane. The combined organic layers were washed with saturated aqueous ammonium chloride, dried over Na<sub>2</sub>SO<sub>4</sub> and concentrated in vacuo. The crude products were purified by silica gel column chromatography using PE/EA (v/v = 30/1) as eluents to give  **$\alpha$ -aryl- $\alpha,\alpha$ -difluoroacetophenone 1a**: white solid; 1.54 g, 89% yield.

## TGA-DSC analysis

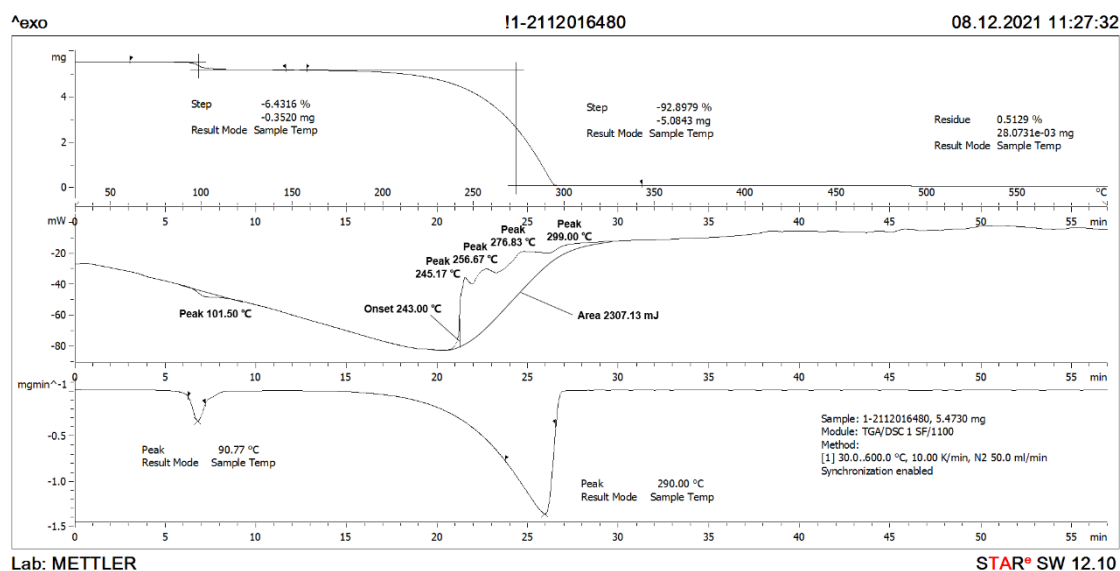

Figure S1 TGA-DSC analysis of DFAP (**1a**).

The thermal stability of DFAP (**1a**) was determined by thermogravimetric analysis-differential scanning calorimetric measurements (TGA-DSC) at a heating rate of 10 K·min<sup>-1</sup>. DFAP first losses organic solvents or impurities with 6.4136 % weight loss. Then there are four continuous exothermic peaks in the range of 245.1 °C-299.0 °C, which shows DFAP decompose gradually. Meanwhile,  $\Delta H = -453.78 \text{ J}\cdot\text{g}^{-1}$  was

calculated by DSC analysis, which indicates an explosion risk with DFAP over 240 °C. Therefore, we recommend using DFAP (**1a**) below 200 °C.

## Representative procedure for the difluorobenylation reaction

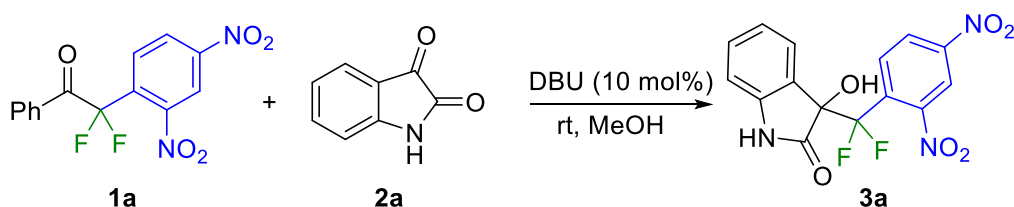

To the mixture of isatin **2a** (0.10 mmol),  $\alpha$ -aryl- $\alpha,\alpha$ -difluoroacetophenone **1a** (0.12 mmol) and 0.5 mL MeOH, DBU (10 mol%, 0.010 mmol) was added and the mixture was stirred at room temperature. After the reaction was completed (monitored by TLC), it was concentrated in vacuo, and the product **3a** was purified by silica gel chromatography (PE/acetone = 4/1, v/v) to give good yield.

## Characterization data of products

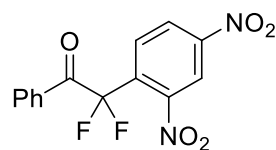

### 2-(2,4-Dinitrophenyl)-2,2-difluoro-1-phenylethan-1-one

**(1a):** white solid; 1.54 g, 89% yield,  $^1\text{H NMR}$  (400 MHz,  $\text{CDCl}_3$ )  $\delta$  (ppm) 8.98 (d,  $J = 2.0$  Hz, 1H), 8.63 (dd,  $J = 8.4, 2.0$  Hz, 1H), 8.20 (d,  $J = 8.4$  Hz, 1H), 8.16-8.14 (m, 2H), 7.73-7.68 (m, 1H), 7.57 (t,  $J = 7.8$  Hz, 1H);  $^{13}\text{C NMR}$  (101 MHz,  $\text{CDCl}_3$ )  $\delta$  (ppm) 187.1 (t,  $J_{\text{C-F}} = 29.9$  Hz, 1C), 149.3, 147.3, 134.7, 134.5 (t,  $J_{\text{C-F}} = 25.6$  Hz, 1C), 131.6 (t,  $J_{\text{C-F}} = 3.1$  Hz, 1C), 130.2 (t,  $J_{\text{C-F}} = 10.2$  Hz, 1C), 129.9 (t,  $J_{\text{C-F}} = 3.0$  Hz, 1C), 129.9 (t,  $J_{\text{C-F}} = 3.0$  Hz, 1C), 128.9, 128.9, 127.8, 121.0, 116.0 (t,  $J_{\text{C-F}} = 261.3$  Hz, 1C).  $^{19}\text{F NMR}$  (376 MHz,  $\text{CDCl}_3$ )  $\delta$  (ppm) -94.7 (s, 2F).

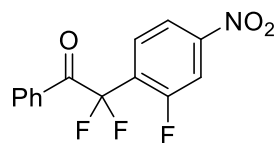

### 2,2-Difluoro-2-(2-fluoro-4-nitrophenyl)-1-phenylethan-1-one

**(1b):** white solid; 82% yield,  $^1\text{H NMR}$  (400 MHz,  $\text{CDCl}_3$ )  $\delta$  (ppm) 8.14-8.12 (m, 3H), 7.97 (dd,  $J = 10.0, 0.8$  Hz, 1H), 7.87 (dd,  $J = 8.0, 7.2$  Hz, 1H), 7.66 (t,  $J = 7.6$  Hz, 1H), 7.51 (t,  $J = 7.8$  Hz, 2H);  $^{13}\text{C NMR}$  (101 MHz,  $\text{CDCl}_3$ )  $\delta$  (ppm) 186.1 (t,  $J_{\text{C-F}} = 31.6$  Hz, 1C), 159.6 (dt,  $J_{\text{C-F}} = 259.0, 4.3$  Hz, 1C), 150.4 (d,  $J_{\text{C-F}} = 8.6$  Hz, 1C), 134.8, 131.0 (t,  $J_{\text{C-F}} = 2.9$  Hz, 1C), 130.1 (t,  $J_{\text{C-F}} = 2.9$  Hz, 1C), 128.8, 128.8, 128.3 (td,  $J_{\text{C-F}} = 7.6, 2.7$  Hz, 1C), 127.5 (td,  $J_{\text{C-F}} = 25.6, 13.2$  Hz, 1C), 119.1 (d,  $J_{\text{C-F}} = 3.9$  Hz, 1C), 115.4 (td,  $J_{\text{C-F}} = 259.0, 2.0$  Hz, 1C), 112.2, 111.9.  $^{19}\text{F NMR}$  (376 MHz,  $\text{CDCl}_3$ )  $\delta$  (ppm) -97.5 (d,  $J = 9.4$  Hz, 2F), -107.2 (t,  $J = 9.2$  Hz, 1F).

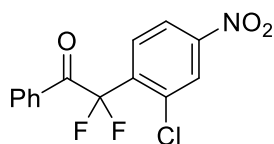

**2-(2-Chloro-4-nitrophenyl)-2,2-difluoro-1-phenylethan-1-one (1c):** pale yellow solid; 79% yield,  $^1\text{H NMR}$  (400 MHz,  $\text{CDCl}_3$ )  $\delta$  (ppm) 8.25-8.21 (m, 2H), 8.11 (d,  $J = 7.6$  Hz, 2H), 7.97 (d,  $J = 8.8$  Hz, 1H), 7.65 (d,  $J = 7.4$  Hz, 1H), 7.51 (t,  $J = 7.8$  Hz, 2H);  $^{13}\text{C NMR}$  (101 MHz,  $\text{CDCl}_3$ )  $\delta$  (ppm) 186.7 (t,  $J_{\text{C-F}} = 31.0$  Hz, 1C), 149.4, 137.8 (t,  $J_{\text{C-F}} = 24.1$  Hz, 1C), 134.6, 133.8 (t,  $J_{\text{C-F}} = 3.9$  Hz, 1C), 131.6 (t,  $J_{\text{C-F}} = 2.7$  Hz, 1C), 129.9 (t,  $J_{\text{C-F}} = 2.8$  Hz, 1C), 129.9 (t,  $J_{\text{C-F}} = 2.8$  Hz, 1C), 128.7, 128.7, 128.6 (t,  $J_{\text{C-F}} = 8.9$  Hz, 1C), 125.6, 121.6, 115.5 (t,  $J_{\text{C-F}} = 259.4$  Hz, 1C).  $^{19}\text{F NMR}$  (376 MHz,  $\text{CDCl}_3$ )  $\delta$  (ppm) -97.6 (s, 2F).

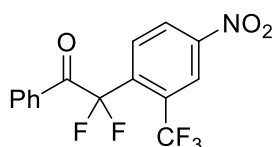

**2,2-Difluoro-2-(4-nitro-2-(trifluoromethyl)phenyl)-1-phenylethan-1-one (1d):** pale yellow oil; 72% yield,  $^1\text{H NMR}$  (400 MHz,  $\text{CDCl}_3$ )  $\delta$  (ppm) 8.66 (d,  $J = 1.6$  Hz, 1H), 8.51 (dd,  $J = 8.4, 2.0$  Hz, 1H), 8.16 (d,  $J = 7.2$  Hz, 2H), 8.02 (d,  $J = 8.8$  Hz, 1H), 7.68 (t,  $J = 7.4$  Hz, 1H), 7.54 (t,  $J = 8.0$  Hz, 2H);  $^{13}\text{C NMR}$  (101 MHz,  $\text{CDCl}_3$ )  $\delta$  (ppm) 187.5 (t,  $J_{\text{C-F}} = 32.0$  Hz, 1C), 149.0, 137.4 (td,  $J_{\text{C-F}} = 25.6, 4.0$  Hz, 1C), 134.8, 131.1 (t,  $J_{\text{C-F}} = 3.4$  Hz, 1C), 130.3 (t,  $J_{\text{C-F}} = 2.6$  Hz, 1C), 130.1, 130.1 (dd,  $J_{\text{C-F}} = 6.0, 2.9$  Hz, 1C), 129.9, 128.8, 128.8, 126.3, 122.9 (q,  $J_{\text{C-F}} = 5.9$  Hz, 1C), 122.1 (q,  $J_{\text{C-F}} = 275.5$  Hz, 1C), 116.7 (t,  $J_{\text{C-F}} = 261.1$  Hz, 1C).  $^{19}\text{F NMR}$  (376 MHz,  $\text{CDCl}_3$ )  $\delta$  (ppm) -58.5 (t,  $J = 11.7$  Hz, 3F), -94.2 (q,  $J = 11.7$  Hz, 2F). **HRMS (ESI)** Calcd for  $[\text{M} - \text{H}]^-$   $\text{C}_{15}\text{H}_7\text{F}_2\text{NO}_3$ ,  $m/z$ : 344.0354, found: 344.0352.

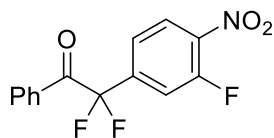

**2-(3-Chloro-4-nitrophenyl)-2,2-difluoro-1-phenylethan-1-one (1e):** orange solid; 76% yield,  $^1\text{H NMR}$  (400 MHz,  $\text{CDCl}_3$ )  $\delta$  (ppm) 8.13 (t,  $J = 8.0$  Hz, 1H), 8.07 (d,  $J = 7.6$  Hz, 2H), 7.66 (t,  $J = 7.6$  Hz, 1H), 7.55-7.49 (m, 4H);  $^{13}\text{C NMR}$  (101 MHz,  $\text{CDCl}_3$ )  $\delta$  (ppm) 187.3 (t,  $J_{\text{C-F}} = 31.4$  Hz, 1C), 155.1 (d,  $J_{\text{C-F}} = 276.9$  Hz, 1C), 140.3 (td,  $J_{\text{C-F}} = 26.1, 7.8$  Hz, 1C), 138.6 (d,  $J_{\text{C-F}} = 7.3$  Hz, 1C), 134.9, 131.2 (t,  $J_{\text{C-F}} = 2.4$  Hz, 1C), 130.2 (t,  $J_{\text{C-F}} = 3.1$  Hz, 1C), 130.2 (t,  $J_{\text{C-F}} = 3.1$  Hz, 1C), 128.9, 128.9, 126.5 (d,  $J_{\text{C-F}} = 2.6$  Hz, 1C), 122.3 (dd,  $J_{\text{C-F}} = 10.8, 6.1$  Hz, 1C), 116.7 (dt,  $J_{\text{C-F}} = 23.4, 6.4$  Hz, 1C), 115.5 (td,  $J_{\text{C-F}} = 258.4, 1.3$  Hz, 1C).  $^{19}\text{F NMR}$  (376 MHz,  $\text{CDCl}_3$ )  $\delta$  (ppm) -97.8 (s, 2F), -115.5 (s, 1F).

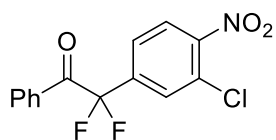

**2-(3-Chloro-4-nitrophenyl)-2,2-difluoro-1-phenylethan-1-one (1f):** yellow solid; 75% yield,  $^1\text{H NMR}$  (400 MHz,  $\text{CDCl}_3$ )  $\delta$  (ppm) 8.07 (dd,  $J = 8.4, 1.2$  Hz, 2H), 7.93 (d,  $J = 8.4$  Hz, 1H), 7.79 (d,  $J = 1.6$  Hz, 1H), 7.69-7.62 (m, 2H), 7.53-7.49 (m, 2H);  $^{13}\text{C NMR}$  (101 MHz,  $\text{CDCl}_3$ )  $\delta$  (ppm) 187.4 (t,  $J_{\text{C-F}} = 31.5$  Hz, 1C), 149.2, 138.0 (t,  $J_{\text{C-F}} = 25.9$  Hz, 1C), 134.9, 131.3 (t,  $J_{\text{C-F}} = 2.3$  Hz, 1C), 130.2 (t,  $J_{\text{C-F}} = 3.1$  Hz, 1C), 130.2 (t,  $J_{\text{C-F}} = 3.1$  Hz, 1C), 129.6 (t,  $J_{\text{C-F}} = 6.5$  Hz, 1C), 128.9, 128.9, 127.5, 125.7, 125.5 (t,  $J_{\text{C-F}} = 6.2$  Hz, 1C), 115.6 (t,  $J_{\text{C-F}} = 258.3$  Hz, 1C).  $^{19}\text{F NMR}$  (376 MHz,  $\text{CDCl}_3$ )  $\delta$  (ppm) -97.7 (s, 2F).

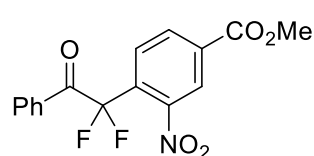

**Methyl 4-(1,1-difluoro-2-oxo-2-phenylethyl)-3-nitrobenzoate (1g):** white solid; 72% yield,  $^1\text{H NMR}$  (400 MHz,  $\text{CDCl}_3$ )  $\delta$  (ppm) 8.77 (s, 1H), 8.44 (d,  $J = 7.2$  Hz, 1H), 8.14 (d,  $J = 6.4$  Hz, 2H), 8.06 (d,  $J = 7.6$  Hz, 1H), 7.67 (t,  $J = 6.4$  Hz, 1H), 7.54 (t,  $J = 6.8$  Hz, 2H), 4.01 (s, 3H);  $^{13}\text{C NMR}$  (101 MHz,  $\text{CDCl}_3$ )  $\delta$  (ppm) 187.5 (t,  $J_{\text{C-F}} = 30.4$  Hz, 1C), 164.1, 146.9, 134.3, 134.2, 133.8, 132.7 (t,  $J_{\text{C-F}} = 25.3$  Hz, 1C), 132.0 (t,  $J_{\text{C-F}} = 2.8$  Hz, 1C), 129.9 (t,  $J_{\text{C-F}} = 2.9$  Hz, 1C), 128.9, 128.8, 128.7, 128.7, 126.5, 116.3 (t,  $J_{\text{C-F}} = 259.7$  Hz, 1C), 53.0.  $^{19}\text{F NMR}$  (376 MHz,  $\text{CDCl}_3$ )  $\delta$  (ppm) -94.9 (s, 2F). **HRMS (ESI)** Calcd for  $[\text{M} + \text{Na}]^+$   $\text{C}_{16}\text{H}_{11}\text{F}_2\text{NO}_5\text{Na}$ ,  $m/z$ : 358.0498, found: 358.0498.

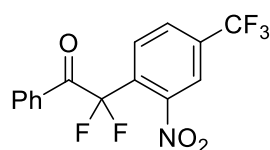

**2,2-Difluoro-2-(2-nitro-4-(trifluoromethyl)phenyl)-1-phenylethan-1-one (1h):** white solid; 88% yield,  $^1\text{H NMR}$  (400 MHz,  $\text{CDCl}_3$ )  $\delta$  (ppm) 8.44 (s, 1H), 8.18-8.12 (m, 3H), 8.06 (d,  $J = 8.4$  Hz, 1H), 7.68 (t,  $J = 7.4$  Hz, 1H), 7.56 (t,  $J = 7.6$  Hz, 2H);  $^{13}\text{C NMR}$  (101 MHz,  $\text{CDCl}_3$ )  $\delta$  (ppm) 187.4 (t,  $J_{\text{C-F}} = 30.2$  Hz, 1C), 147.0, 134.4, 134.3 (dd,  $J_{\text{C-F}} = 69.8, 35.7$  Hz, 1C), 132.4 (t,  $J_{\text{C-F}} = 25.6$  Hz, 1C), 131.9 (t,  $J_{\text{C-F}} = 3.2$  Hz, 1C), 130.3 (q,  $J_{\text{C-F}} = 3.2$  Hz, 1C), 129.9 (t,  $J_{\text{C-F}} = 3.0$  Hz, 1C), 129.5 (t,  $J_{\text{C-F}} = 10.2$  Hz, 1C), 129.0, 128.8, 128.8, 122.9 (q,  $J_{\text{C-F}} = 3.7$  Hz, 1C), 122.3 (q,  $J_{\text{C-F}} = 274.3$  Hz, 1C), 116.2 (t,  $J_{\text{C-F}} = 260.2$  Hz, 1C).  $^{19}\text{F NMR}$  (376 MHz,  $\text{CDCl}_3$ )  $\delta$  (ppm) -63.2 (s, 3F), -95.0 (s, 2F). **HRMS (ESI)** Calcd for  $[\text{M} + \text{Na}]^+$   $\text{C}_{15}\text{H}_8\text{F}_5\text{NO}_3\text{Na}$ ,  $m/z$ : 368.0317, found: 368.0317.

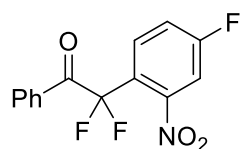

**2,2-Difluoro-2-(4-fluoro-2-nitrophenyl)-1-phenylethan-1-one (1i):** white solid; 53% yield,  $^1\text{H NMR}$  (400 MHz,  $\text{CDCl}_3$ )  $\delta$  (ppm) 8.15 (dd,  $J = 8.0, 0.8$  Hz, 2H), 7.99 (dd,  $J = 8.8, 5.2$  Hz, 1H), 7.90 (dd,  $J = 8.4, 2.8$  Hz, 1H), 7.70-7.65 (m, 1H), 7.57-7.50 (m, 3H);  $^{13}\text{C NMR}$  (101 MHz,  $\text{CDCl}_3$ )  $\delta$  (ppm) 187.7 (t,  $J_{\text{C-F}} = 30.9$  Hz, 1C), 163.4 (d,  $J_{\text{C-F}} = 257.1$  Hz, 1C), 147.8, 134.2, 132.2 (t,  $J_{\text{C-F}} = 3.2$ , 1C), 130.4 (dt,  $J_{\text{C-F}} = 10.4, 8.7$  Hz, 1C), 129.9 (t,  $J_{\text{C-F}} = 3.0$  Hz, 1C), 129.9 (t,  $J_{\text{C-F}} = 3.0$  Hz, 1C), 128.7, 128.7, 125.1 (td,  $J_{\text{C-F}} = 25.6, 4.1$  Hz, 1C), 120.7 (d,  $J_{\text{C-F}} = 21.3$  Hz, 1C), 116.4 (t,  $J_{\text{C-F}} = 258.9$  Hz, 1C), 113.7 (d,  $J_{\text{C-F}} = 27.3$  Hz, 1C).  $^{19}\text{F NMR}$  (376 MHz,  $\text{CDCl}_3$ )  $\delta$  (ppm) -94.1 (s, 2F), -105.1(-105.2) (m, 1F). **HRMS (ESI)** Calcd for  $[\text{M} + \text{Na}]^+$   $\text{C}_{14}\text{H}_8\text{F}_2\text{NO}_3\text{Na}$ ,  $m/z$ : 318.0348, found: 318.0349.

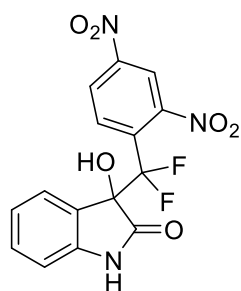

**3-((2,4-Dinitrophenyl)difluoromethyl)-3-hydroxyindolin-2-one (3a):** pale yellow solid; 36.2 mg, 99% yield,  $^1\text{H NMR}$  (400 MHz,  $\text{DMSO-}d_6$ )  $\delta$  (ppm) 10.73 (s, 1H), 8.81 (s, 1H), 8.61 (d,  $J = 8.4$  Hz, 1H), 8.19 (d,  $J = 8.8$  Hz, 1H), 7.57 (s, 1H), 7.34 (t,  $J = 7.4$  Hz, 1H), 7.13 (d,  $J = 6.8$  Hz, 1H), 7.00 (t,  $J = 7.4$  Hz, 1H), 6.89 (d,  $J = 8.0$  Hz, 1H);  $^{13}\text{C NMR}$  (101 MHz,  $\text{DMSO-}d_6$ )  $\delta$  (ppm) 173.2 (d,  $J_{\text{C-F}} = 5.8$  Hz, 1C), 149.1, 149.0, 142.9, 132.5 (t,  $J_{\text{C-F}} = 7.0$  Hz, 1C), 131.0, 129.2 (t,  $J_{\text{C-F}} = 26.9$  Hz, 1C), 126.3, 125.6, 125.2, 122.1,

119.1, 119.0 (dd,  $J_{C-F} = 255.0, 251.4$  Hz, 1C), 110.2, 77.8 (dd,  $J_{C-F} = 32.6, 27.4$  Hz, 1C).  **$^{19}\text{F}$  NMR (376 MHz, DMSO- $d_6$ )**  $\delta$  (ppm) -99.9 (d,  $J = 177.1$  Hz, 1F), -103.5 (d,  $J = 177.1$  Hz, 1F). **HRMS (ESI)** Calcd for  $[\text{M} + \text{H}]^+$   $\text{C}_{15}\text{H}_{10}\text{F}_2\text{N}_3\text{O}_6$ ,  $m/z$ : 366.0538, found: 366.0530.

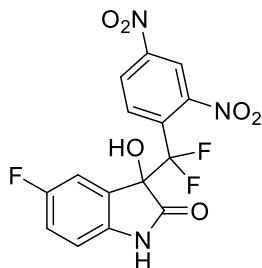

**3-((2,4-Dinitrophenyl)difluoromethyl)-5-fluoro-3-hydroxyindolin-2-one (3b)**: pale yellow solid; 34.5 mg, 90% yield,  **$^1\text{H}$  NMR (400 MHz, DMSO- $d_6$ )**  $\delta$  (ppm) 10.79 (s, 1H), 8.82 (s, 1H), 8.61 (d,  $J = 8.4$  Hz, 1H), 8.18 (d,  $J = 8.8$  Hz, 1H), 7.76 (s, 1H), 7.20 (t,  $J = 8.0$  Hz, 1H), 6.96 (d,  $J = 6.8$  Hz, 1H), 6.89 (dd,  $J = 8.0, 4.0$  Hz, 1H);  **$^{13}\text{C}$  NMR (101 MHz, DMSO- $d_6$ )**  $\delta$  (ppm) 173.2 (d,  $J_{C-F} = 5.2$  Hz, 1C), 158.0 (d,  $J_{C-F} = 239.3$  Hz, 1C), 149.2, 149.0, 139.2, 132.6 (t,  $J_{C-F} = 6.0$  Hz, 1C), 128.9 (t,  $J_{C-F} = 26.8$  Hz, 1C), 127.1 (d,  $J_{C-F} = 7.8$  Hz, 1C), 125.3, 119.2, 118.9 (dd,  $J_{C-F} = 254.9, 252.3$  Hz, 1C), 117.5 (d,  $J_{C-F} = 23.7$  Hz, 1C), 113.9 (d,  $J_{C-F} = 24.9$  Hz, 1C), 111.3 (d,  $J_{C-F} = 7.9$  Hz, 1C), 78.1 (dd,  $J_{C-F} = 32.6, 28.4$  Hz, 1C).  **$^{19}\text{F}$  NMR (376 MHz, DMSO- $d_6$ )**  $\delta$  (ppm) -99.8 (d,  $J = 177.5$  Hz, 1F), -103.5 (d,  $J = 177.5$  Hz, 1F), -120.8(-120.9) (m, 1F). **HRMS (ESI)** Calcd for  $[\text{M} + \text{Na}]^+$   $\text{C}_{15}\text{H}_9\text{F}_3\text{N}_3\text{O}_6\text{Na}$ ,  $m/z$ : 406.0257, found: 406.0281.

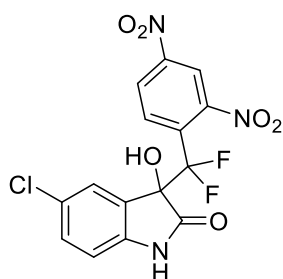

**5-Chloro-3-((2,4-dinitrophenyl)difluoromethyl)-3-hydroxyindolin-2-one (3c)**: pale yellow solid; 39.2 mg, 98% yield,  **$^1\text{H}$  NMR (400 MHz, DMSO- $d_6$ )**  $\delta$  (ppm) 10.91 (s, 1H), 8.83 (s, 1H), 8.61 (d,  $J = 8.0$ , 1H), 8.18 (d,  $J = 8.4$ , 1H), 7.76 (s, 1H), 7.42 (d,  $J = 7.6$ , 1H), 7.16 (s, 1H), 6.91 (d,  $J = 8.0$ , 1H);  **$^{13}\text{C}$  NMR (101 MHz, DMSO- $d_6$ )**  $\delta$  (ppm) 172.7 (d,  $J_{C-F} = 6.1$  Hz, 1C), 149.1, 148.9, 141.8, 132.5 (t,  $J_{C-F} = 7.0$  Hz, 1C), 130.8, 128.7 (t,  $J_{C-F} = 26.8$  Hz, 1C), 127.4, 126.1 (d,  $J_{C-F} = 1.4$  Hz, 1C), 126.1, 125.2, 119.1, 118.8 (dd,  $J_{C-F} = 256.6, 250.8$  Hz, 1C), 111.8, 77.9 (dd,  $J_{C-F} = 33.2, 26.9$  Hz, 1C).  **$^{19}\text{F}$  NMR (376 MHz, DMSO- $d_6$ )**  $\delta$  (ppm) -99.0 (d,  $J = 266.2$  Hz, 1F), -103.9 (d,  $J = 266.2$  Hz, 1F). **HRMS (ESI)** Calcd for  $[\text{M} + \text{H}]^+$   $\text{C}_{15}\text{H}_9\text{ClF}_2\text{N}_3\text{O}_6$ ,  $m/z$ : 400.0148, found: 400.0141.

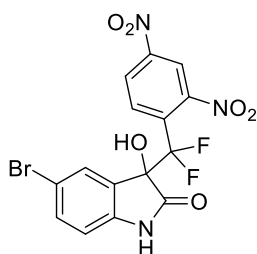

**5-Bromo-3-((2,4-dinitrophenyl)difluoromethyl)-3-hydroxyindolin-2-one (3d)**: pale yellow solid; 36.8 mg, 83% yield,  **$^1\text{H}$  NMR (400 MHz, DMSO- $d_6$ )**  $\delta$  (ppm) 10.92 (s, 1H), 8.83 (d,  $J = 2.0$  Hz, 1H), 8.61 (dd,  $J = 8.0, 2.0$  Hz, 1H), 8.17 (d,  $J = 8.8$  Hz, 1H), 7.77 (d,  $J = 1.6$  Hz, 1H), 7.55 (dd,  $J = 8.4, 2.0$  Hz, 1H), 7.29 (s, 1H), 6.87 (d,  $J = 8.0$  Hz, 1H);  **$^{13}\text{C}$  NMR (101 MHz, DMSO- $d_6$ )**  $\delta$  (ppm) 172.7 (d,  $J_{C-F} = 6.2$  Hz, 1C), 149.2, 149.0, 142.3, 133.8, 132.6 (t,  $J_{C-F} = 7.0$  Hz, 1C), 128.9, 128.9 (t,  $J_{C-F} = 26.8$  Hz, 1C), 127.9, 125.3, 119.2, 118.9 (dd,  $J_{C-F} = 257.6, 250.8$  Hz, 1C), 113.7, 112.4, 77.9 (dd,  $J_{C-F} = 33.3, 26.3$  Hz, 1C).  **$^{19}\text{F}$  NMR (376 MHz, DMSO- $d_6$ )**  $\delta$  (ppm) -98.7 (d,  $J = 176.0$  Hz, 1F), -103.9 (d,  $J = 175.6$  Hz, 1F). **HRMS (ESI)** Calcd for  $[\text{M} + \text{H}]^+$   $\text{C}_{15}\text{H}_9\text{BrF}_2\text{N}_3\text{O}_6$ ,  $m/z$ : 443.9643, found: 443.9638.

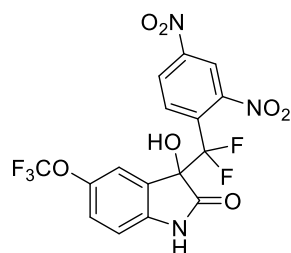

**3-((2,4-Dinitrophenyl)difluoromethyl)-3-hydroxy-5-(trifluoromethoxy)indolin-2-one (3e):** pale yellow solid; 42.7 mg, 95% yield,  $^1\text{H NMR}$  (400 MHz,  $\text{DMSO-}d_6$ )  $\delta$  (ppm) 10.94 (s, 1H), 8.81 (d,  $J = 2.4$  Hz, 1H), 8.62 (dd,  $J = 8.8, 2.0$  Hz, 1H), 8.19 (d,  $J = 8.8$  Hz, 1H), 7.81 (s, 1H), 7.37 (dd,  $J = 8.4, 2.0$  Hz, 1H), 7.00 (s, 1H), 6.99 (d,  $J = 8.4$  Hz, 1H);  $^{13}\text{C NMR}$  (101 MHz,  $\text{DMSO-}d_6$ )  $\delta$  (ppm) 173.1 (d,  $J_{\text{C-F}} = 5.4$  Hz, 1C), 149.2, 148.8, 143.2, 142.2, 132.5 (t,  $J_{\text{C-F}} = 6.8$  Hz, 1C), 128.6 (t,  $J_{\text{C-F}} = 26.7$  Hz, 1C), 127.1, 125.4, 124.5, 120.2 (q,  $J_{\text{C-F}} = 256.5$  Hz, 1C), 119.7, 119.2, 118.8 (dd,  $J_{\text{C-F}} = 255.9, 252.2$  Hz, 1C), 111.4, 77.9 (dd,  $J_{\text{C-F}} = 32.0, 27.6$  Hz, 1C).  $^{19}\text{F NMR}$  (376 MHz,  $\text{DMSO-}d_6$ )  $\delta$  (ppm) -57.4 (s, 3F), -100.4 (d,  $J = 177.1$  Hz, 1F), -103.4 (d,  $J = 177.1$  Hz, 1F). **HRMS (ESI)** Calcd for  $[\text{M} + \text{H}]^+$   $\text{C}_{16}\text{H}_9\text{F}_5\text{N}_3\text{O}_7$ ,  $m/z$ : 450.0361, found: 450.0357.

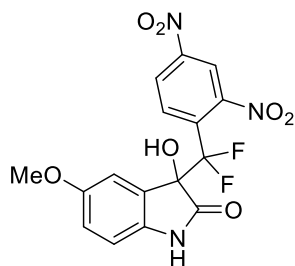

**3-((2,4-Dinitrophenyl)difluoromethyl)-3-hydroxy-5-methoxyindolin-2-one (3f):** pale yellow solid; 36.4 mg, 92% yield,  $^1\text{H NMR}$  (400 MHz,  $\text{DMSO-}d_6$ )  $\delta$  (ppm) 10.57 (s, 1H), 8.81 (s, 1H), 8.60 (s, 1H), 8.19 (s, 1H), 7.60 (s, 1H), 6.91–6.72 (m, 3H), 3.68 (s, 3H);  $^{13}\text{C NMR}$  (101 MHz,  $\text{DMSO-}d_6$ )  $\delta$  (ppm) 173.0 (d,  $J_{\text{C-F}} = 5.5$  Hz, 1C), 154.9, 149.1, 149.0, 136.1, 132.6 (t,  $J_{\text{C-F}} = 6.5$  Hz, 1C), 129.2 (t,  $J_{\text{C-F}} = 26.5$  Hz, 1C), 126.7, 125.2, 119.1, 119.0 (dd,  $J_{\text{C-F}} = 254.8, 252.9$  Hz, 1C), 115.8, 112.9, 110.7, 78.2 (dd,  $J_{\text{C-F}} = 31.5, 25.6$  Hz, 1C), 55.6.  $^{19}\text{F NMR}$  (376 MHz,  $\text{DMSO-}d_6$ )  $\delta$  (ppm) -99.8 (d,  $J = 177.1$  Hz, 1F), -103.6 (d,  $J = 177.1$  Hz, 1F). **HRMS (ESI)** Calcd for  $[\text{M} + \text{Na}]^+$   $\text{C}_{16}\text{H}_{11}\text{F}_2\text{N}_3\text{O}_7\text{Na}$ ,  $m/z$ : 418.0457, found: 418.0451.

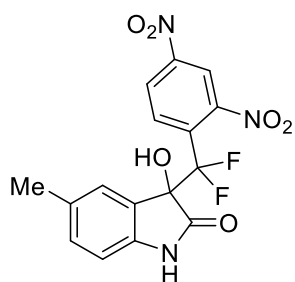

**3-((2,4-Dinitrophenyl)difluoromethyl)-3-hydroxy-5-methylindolin-2-one (3g):** pale yellow solid; 36.8 mg, 97% yield,  $^1\text{H NMR}$  (400 MHz,  $\text{DMSO-}d_6$ )  $\delta$  (ppm) 10.62 (s, 1H), 8.79 (s, 1H), 8.60 (s, 1H), 8.18 (s, 1H), 7.51 (s, 1H), 7.14 (s, 1H), 7.01 (s, 1H), 6.78 (s, 1H), 2.25 (s, 3H);  $^{13}\text{C NMR}$  (101 MHz,  $\text{DMSO-}d_6$ )  $\delta$  (ppm) 173.1 (d,  $J_{\text{C-F}} = 6.2$  Hz, 1C), 149.0, 149.0, 140.4, 132.5 (t,  $J_{\text{C-F}} = 7.0$  Hz, 1C), 131.0, 131.0, 129.3 (t,  $J_{\text{C-F}} = 27.1$  Hz, 1C), 126.8, 125.7, 125.0, 119.0, 118.9 (dd,  $J_{\text{C-F}} = 258.0, 256.1$  Hz, 1C), 109.8, 77.9 (dd,  $J_{\text{C-F}} = 33.6, 27.0$  Hz, 1C), 20.5.  $^{19}\text{F NMR}$  (376 MHz,  $\text{DMSO-}d_6$ )  $\delta$  (ppm) -99.1 (d,  $J = 176.0$  Hz, 1F), -103.7 (d,  $J = 175.6$  Hz, 1F). **HRMS (ESI)** Calcd for  $[\text{M} + \text{H}]^+$   $\text{C}_{16}\text{H}_{12}\text{F}_2\text{N}_3\text{O}_6$ ,  $m/z$ : 380.0694, found: 380.0685.



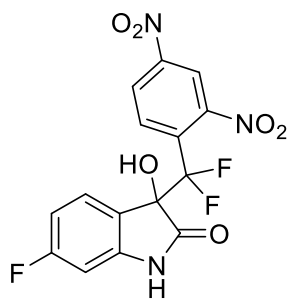

**3-((2,4-Dinitrophenyl)difluoromethyl)-6-fluoro-3-hydroxyindolin-2-one (3h):** pale yellow solid; 35.7 mg, 93% yield,  $^1\text{H NMR}$  (400 MHz,  $\text{DMSO-}d_6$ )  $\delta$  (ppm) 10.89 (s, 1H), 8.80 (d,  $J = 2.4$  Hz, 1H), 8.61 (dd,  $J = 8.8, 2.0$  Hz, 1H), 8.17 (d,  $J = 8.8$  Hz, 1H), 7.62 (s, 1H), 7.09 (dd,  $J = 8.0, 5.6$  Hz, 1H), 6.82-6.77 (m, 1H), 6.72 (dd,  $J = 8.8, 2.0$  Hz, 1H);  $^{13}\text{C NMR}$  (101 MHz,  $\text{DMSO-}d_6$ )  $\delta$  (ppm) 173.4 (d,  $J_{\text{C-F}} = 5.5$  Hz, 1C), 163.7 (d,  $J_{\text{C-F}} = 246.5$  Hz, 1C), 149.1, 148.9, 144.8 (d,  $J_{\text{C-F}} = 12.6$  Hz, 1C), 132.4 (t,  $J_{\text{C-F}} = 7.1$  Hz, 1C), 128.9 (t,  $J_{\text{C-F}} = 27.0$  Hz, 1C), 128.0 (d,  $J_{\text{C-F}} = 10.0$  Hz, 1C), 125.2, 121.5 (d,  $J_{\text{C-F}} = 2.6$  Hz, 1C), 119.1, 118.8 (dd,  $J_{\text{C-F}} = 255.3, 252.4$  Hz, 1C), 108.4 (d,  $J_{\text{C-F}} = 22.7$  Hz, 1C), 98.5 (d,  $J_{\text{C-F}} = 27.4$  Hz, 1C), 77.4 (dd,  $J_{\text{C-F}} = 32.4, 28.1$  Hz, 1C).  $^{19}\text{F NMR}$  (376 MHz,  $\text{DMSO-}d_6$ )  $\delta$  (ppm) -100.5 (d,  $J = 265.1$  Hz, 1F), -103.3 (d,  $J = 265.1$  Hz, 1F), -108.8 (s, 1F). **HRMS (ESI)** Calcd for  $[\text{M} + \text{Na}]^+$   $\text{C}_{15}\text{H}_8\text{F}_3\text{N}_3\text{O}_6\text{Na}$ ,  $m/z$ : 406.0257, found: 406.0281.

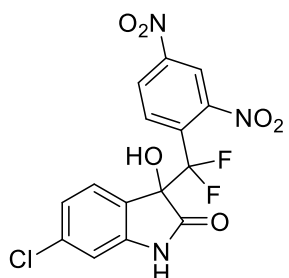

**6-Chloro-3-((2,4-dinitrophenyl)difluoromethyl)-3-hydroxyindolin-2-one (3i):** pale yellow solid; 37.5 mg, 94% yield,  $^1\text{H NMR}$  (400 MHz,  $\text{DMSO-}d_6$ )  $\delta$  (ppm) 10.92 (s, 1H), 8.81 (s, 1H), 8.60 (d,  $J = 7.2$  Hz, 1H), 8.17 (d,  $J = 8.0$  Hz, 1H), 7.70 (s, 1H), 7.06 (d,  $J = 6.0$  Hz, 2H), 6.92 (s, 1H);  $^{13}\text{C NMR}$  (101 MHz,  $\text{DMSO-}d_6$ )  $\delta$  (ppm) 173.2 (d,  $J_{\text{C-F}} = 5.5$  Hz, 1C), 149.2, 148.9, 144.4, 135.3, 132.5 (t,  $J_{\text{C-F}} = 7.0$  Hz, 1C), 128.8 (t,  $J_{\text{C-F}} = 26.8$  Hz, 1C), 127.8, 125.3, 124.4, 122.0, 119.2, 118.8 (dd,  $J_{\text{C-F}} = 254.3, 252.0$  Hz, 1C), 110.3, 77.5 (dd,  $J_{\text{C-F}} = 31.7, 28.5$  Hz, 1C).  $^{19}\text{F NMR}$  (376 MHz,  $\text{DMSO-}d_6$ )  $\delta$  (ppm) -100.3 (d,  $J = 180.5$  Hz, 1F), -103.3 (d,  $J = 176.0$  Hz, 1F). **HRMS (ESI)** Calcd for  $[\text{M} + \text{Na}]^+$   $\text{C}_{15}\text{H}_8\text{ClF}_2\text{N}_3\text{O}_6\text{Na}$ ,  $m/z$ : 421.9962, found: 421.9956.

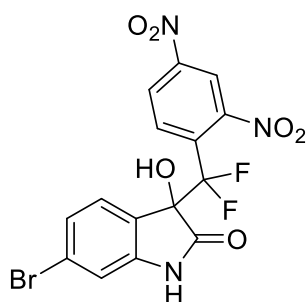

**6-Bromo-3-((2,4-dinitrophenyl)difluoromethyl)-3-hydroxyindolin-2-one (3j):** pale yellow solid; 41.2 mg, 93% yield,  $^1\text{H NMR}$  (400 MHz,  $\text{DMSO-}d_6$ )  $\delta$  (ppm) 10.89 (s, 1H), 8.80 (d,  $J = 2.4$  Hz, 1H), 8.60 (dd,  $J = 8.8, 2.0$  Hz, 1H), 8.17 (d,  $J = 8.8$  Hz, 1H), 7.68 (s, 1H), 7.19 (dd,  $J = 8.0, 2.0$  Hz, 1H), 7.05 (d,  $J = 1.6$  Hz, 1H), 7.02 (d,  $J = 8.0$  Hz, 1H);  $^{13}\text{C NMR}$  (101 MHz,  $\text{DMSO-}d_6$ )  $\delta$  (ppm) 173.1 (d,  $J_{\text{C-F}} = 5.5$  Hz, 1C), 149.2, 149.0, 144.5, 132.5 (t,  $J_{\text{C-F}} = 7.0$  Hz, 1C), 128.9 (t,  $J_{\text{C-F}} = 27.0$  Hz, 1C), 128.1, 125.3, 124.9, 124.9, 123.8, 119.2, 118.8 (dd,  $J_{\text{C-F}} = 255.4, 252.2$  Hz, 1C), 113.1, 77.6 (dd,  $J_{\text{C-F}} = 32.4, 28.1$  Hz, 1C).  $^{19}\text{F NMR}$  (376 MHz,  $\text{DMSO-}d_6$ )  $\delta$  (ppm) -100.1 (dd,  $J = 265.8, 158.3$  Hz, 1F), -103.5 (dd,  $J = 265.5, 85.0$  Hz, 1F). **HRMS (ESI)** Calcd for  $[\text{M} + \text{H}]^+$   $\text{C}_{15}\text{H}_9\text{BrF}_2\text{N}_3\text{O}_6$ ,  $m/z$ : 443.9643, found: 443.9638.

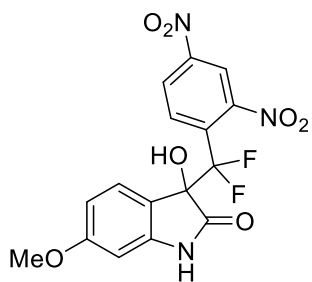

**3-((2,4-Dinitrophenyl)difluoromethyl)-3-hydroxy-6-methoxyindolin-2-one (3k):** pale yellow solid; 35.2 mg, 89% yield,  $^1\text{H NMR}$  (400 MHz,  $\text{DMSO-}d_6$ )  $\delta$  (ppm) 10.65 (s, 1H), 8.79 (d,  $J = 2.0$  Hz, 1H), 8.59 (d,  $J = 8.8$  Hz, 1H), 8.17 (d,  $J = 8.8$  Hz, 1H), 7.42 (s, 1H), 6.99 (d,  $J = 8.4$  Hz, 1H), 6.53 (dd,  $J = 8.4, 2.0$  Hz, 1H), 6.41 (d,  $J = 2.0$  Hz, 1H), 3.76 (s, 3H);  $^{13}\text{C NMR}$  (101 MHz,  $\text{DMSO-}d_6$ )  $\delta$  (ppm) 173.7 (d,  $J_{\text{C-F}} = 5.8$  Hz, 1C), 161.5, 149.0, 148.9, 144.3, 132.4 (t,  $J_{\text{C-F}} = 6.9$  Hz, 1C), 129.3 (t,  $J_{\text{C-F}} = 27.0$  Hz, 1C), 127.3, 125.1, 119.1, 118.9 (dd,  $J_{\text{C-F}} = 254.8, 251.4$  Hz, 1C), 117.2, 106.9, 96.8, 77.5 (dd,  $J_{\text{C-F}} = 32.3, 27.8$  Hz, 1C), 55.4.  $^{19}\text{F NMR}$  (376 MHz,  $\text{DMSO-}d_6$ )  $\delta$  (ppm) -100.3 (d,  $J = 264.7$  Hz, 1F), -103.1 (d,  $J = 264.7$  Hz, 1F). **HRMS (ESI)** Calcd for  $[\text{M} + \text{H}]^+$   $\text{C}_{16}\text{H}_{12}\text{F}_2\text{N}_3\text{O}_6$ ,  $m/z$ : 396.0646, found: 396.0634.

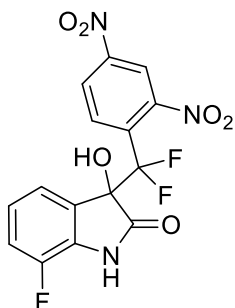

**3-((2,4-Dinitrophenyl)difluoromethyl)-7-fluoro-3-hydroxyindolin-2-one (3l):** white solid; 37.9 mg, 99% yield,  $^1\text{H NMR}$  (400 MHz,  $\text{DMSO-}d_6$ )  $\delta$  (ppm) 11.31 (s, 1H), 8.82 (s, 1H), 8.61 (d,  $J = 5.6$  Hz, 1H), 8.18 (d,  $J = 4.8$  Hz, 1H), 7.75 (s, 1H), 7.29 (s, 1H), 7.03 (s, 1H), 6.97 (s, 1H);  $^{13}\text{C NMR}$  (101 MHz,  $\text{DMSO-}d_6$ )  $\delta$  (ppm) 173.0 (d,  $J_{\text{C-F}} = 5.1$  Hz, 1C), 149.1, 148.9, 146.4 (d,  $J_{\text{C-F}} = 244.2$  Hz, 1C), 132.4 (t,  $J_{\text{C-F}} = 6.8$  Hz, 1C), 130.0 (d,  $J_{\text{C-F}} = 13.0$  Hz, 1C), 128.8 (d,  $J_{\text{C-F}} = 27.1$  Hz, 1C), 128.4 (d,  $J_{\text{C-F}} = 3.3$  Hz, 1C), 125.2, 123.1 (d,  $J_{\text{C-F}} = 5.8$  Hz, 1C), 122.3, 119.1, 118.7 (dd,  $J_{\text{C-F}} = 255.8, 252.0$  Hz, 1C), 118.0 (d,  $J_{\text{C-F}} = 17.2$  Hz, 1C), 77.9 (dd,  $J_{\text{C-F}} = 30.0, 28.4$  Hz, 1C).  $^{19}\text{F NMR}$  (376 MHz,  $\text{DMSO-}d_6$ )  $\delta$  (ppm) -99.9 (d,  $J = 176.0$  Hz, 1F), -103.5 (d,  $J = 176.0$  Hz, 1F), -132.5 (s, 1F). **HRMS (ESI)** Calcd for  $[\text{M} + \text{H}]^+$   $\text{C}_{15}\text{H}_9\text{F}_3\text{N}_3\text{O}_6$ ,  $m/z$ : 384.0443, found: 384.0434.

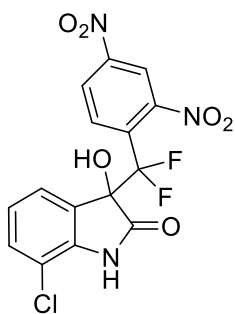

**7-Chloro-3-((2,4-dinitrophenyl)difluoromethyl)-3-hydroxyindolin-2-one (3m):** pale yellow solid; 38.3 mg, 96% yield,  $^1\text{H NMR}$  (400 MHz,  $\text{DMSO-}d_6$ )  $\delta$  (ppm) 11.23 (s, 1H), 8.83 (d,  $J = 2.0$  Hz, 1H), 8.62 (dd,  $J = 8.8, 2.0$  Hz, 1H), 8.18 (d,  $J = 8.8$  Hz, 1H), 7.76 (s, 1H), 7.43 (dd,  $J = 8.0, 0.8$  Hz, 1H), 7.09-7.01 (m, 2H);  $^{13}\text{C NMR}$  (101 MHz,  $\text{DMSO-}d_6$ )  $\delta$  (ppm) 173.2 (d,  $J_{\text{C-F}} = 5.8$  Hz, 1C), 149.2, 149.0, 140.6, 132.5 (t,  $J_{\text{C-F}} = 7.2$  Hz, 1C), 130.9, 128.8 (t,  $J_{\text{C-F}} = 26.8$  Hz, 1C), 127.5, 125.3, 124.9, 123.6, 119.2, 118.8 (dd,  $J_{\text{C-F}} = 256.3, 251.8$  Hz, 1C), 114.4, 78.3 (dd,  $J_{\text{C-F}} = 32.7, 27.7$  Hz, 1C).  $^{19}\text{F NMR}$  (376 MHz,  $\text{DMSO-}d_6$ )  $\delta$  (ppm) -99.8 (d,  $J = 177.5$  Hz, 1F), -103.5 (d,  $J = 177.5$  Hz, 1F). **HRMS (ESI)** Calcd for  $[\text{M} + \text{H}]^+$   $\text{C}_{15}\text{H}_9\text{F}_2\text{ClN}_3\text{O}_6$ ,  $m/z$ : 400.0148, found: 400.0143.

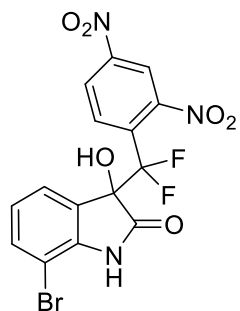

**7-Bromo-3-((2,4-dinitrophenyl)difluoromethyl)-3-hydroxyindolin-2-one (3n):** pale yellow solid; 39.9 mg, 90% yield,  $^1\text{H NMR}$  (400 MHz,  $\text{DMSO-}d_6$ )  $\delta$  (ppm) 10.91(s, 1H), 8.81 (s, 1H), 8.61 (d,  $J = 8.8$  Hz, 1H), 8.16 (d,  $J = 8.8$  Hz, 1H), 7.69 (s, 1H), 7.19 (d,  $J = 7.6$  Hz, 1H), 7.05 (s, 1H), 7.01 (d,  $J = 7.6$  Hz, 1H);  $^{13}\text{C NMR}$  (101 MHz,  $\text{DMSO-}d_6$ )  $\delta$  (ppm) 173.0 (d,  $J_{\text{C-F}} = 5.1$  Hz, 1C), 149.2, 148.9, 144.5, 132.4 (t,  $J_{\text{C-F}} = 6.7$  Hz, 1C), 128.8 (t,  $J_{\text{C-F}} = 26.4$  Hz, 1C), 128.0, 125.3, 124.9, 124.9, 123.8, 119.2, 118.8 (dd,  $J_{\text{C-F}} = 256.1, 251.9$  Hz, 1C), 113.1, 77.5 (dd,  $J_{\text{C-F}} = 31.9, 27.9$  Hz, 1C).  $^{19}\text{F NMR}$  (376 MHz,  $\text{DMSO-}d_6$ )  $\delta$  (ppm) -100.0 (dd,  $J = 260.2, 156.8$  Hz, 1F), -103.5 (dd,  $J = 265.5, 86.1$  Hz, 1F). **HRMS (ESI)** Calcd for  $[\text{M} + \text{H}]^+$   $\text{C}_{15}\text{H}_9\text{BrF}_2\text{N}_3\text{O}_6$ ,  $m/z$ : 443.9643, found: 443.9646

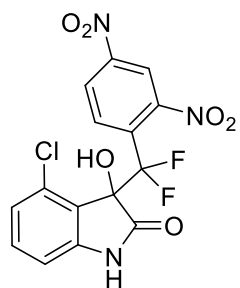

**4-Chloro-3-((2,4-dinitrophenyl)difluoromethyl)-3-hydroxyindolin-2-one (3o):** pale yellow solid; 36.7 mg, 92% yield,  $^1\text{H NMR}$  (400 MHz,  $\text{DMSO-}d_6$ )  $\delta$  (ppm) 10.90 (s, 1H), 8.78 (s, 1H), 8.58 (s, 1H), 8.17 (s, 1H), 7.56 (s, 1H), 7.33 (s, 1H), 6.99 (s, 1H), 6.85 (s, 1H);  $^{13}\text{C NMR}$  (101 MHz,  $\text{DMSO-}d_6$ )  $\delta$  (ppm) 173.2 (d,  $J_{\text{C-F}} = 4.8$  Hz, 1C), 149.1, 148.7, 145.1, 133.0 (t,  $J_{\text{C-F}} = 6.8$  Hz, 1C), 132.4, 132.2, 129.7 (t,  $J_{\text{C-F}} = 26.2$  Hz, 1C), 125.1, 123.7, 122.1, 119.1 (dd,  $J_{\text{C-F}} = 254.6, 251.8$  Hz, 1C), 119.0, 109.1, 79.6 (t,  $J_{\text{C-F}} = 30.3$  Hz, 1C).  $^{19}\text{F NMR}$  (376 MHz,  $\text{DMSO-}d_6$ )  $\delta$  (ppm) -96.6 (d,  $J = 175.2$  Hz, 1F), -101.7 (d,  $J = 175.2$  Hz, 1F). **HRMS (ESI)** Calcd for  $[\text{M} + \text{Na}]^+$   $\text{C}_{15}\text{H}_8\text{ClF}_2\text{N}_3\text{O}_6\text{Na}$ ,  $m/z$ : 421.9962, found: 421.9956.

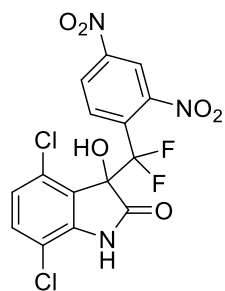

**4,7-Dichloro-3-((2,4-dinitrophenyl)difluoromethyl)-3-hydroxyindolin-2-one (3p):** pale yellow solid; 41.6 mg, 96% yield,  $^1\text{H NMR}$  (400 MHz,  $\text{DMSO-}d_6$ )  $\delta$  (ppm) 11.37 (s, 1H), 8.80 (s, 1H), 8.59 (d,  $J = 8.4$  Hz, 1H), 8.17 (d,  $J = 8.4$  Hz, 1H), 7.75 (s, 1H), 7.44 (d,  $J = 8.4$  Hz, 1H), 7.02 (d,  $J = 8.4$  Hz, 1H);  $^{13}\text{C NMR}$  (101 MHz,  $\text{DMSO-}d_6$ )  $\delta$  (ppm) 173.2 (d,  $J_{\text{C-F}} = 4.5$  Hz, 1C), 149.3, 148.8, 142.6, 133.0 (t,  $J_{\text{C-F}} = 7.0$  Hz, 1C), 132.2, 130.8, 129.4 (t,  $J_{\text{C-F}} = 26.7$  Hz, 1C), 125.2, 124.9, 123.6, 119.2, 119.0 (dd,  $J_{\text{C-F}} = 259.8, 254.6$  Hz, 1C), 113.4, 80.4 (t,  $J_{\text{C-F}} = 30.6$  Hz, 1C);  $^{19}\text{F NMR}$  (376 MHz,  $\text{DMSO-}d_6$ )  $\delta$  (ppm) -97.1 (d,  $J = 174.8$  Hz, 1F), -101.5 (d,  $J = 175.2$  Hz, 1F). **HRMS (ESI)** Calcd for  $[\text{M} + \text{Na}]^+$   $\text{C}_{15}\text{H}_7\text{Cl}_2\text{F}_2\text{N}_3\text{O}_6\text{Na}$ ,  $m/z$ : 455.9572, found: 455.9570.

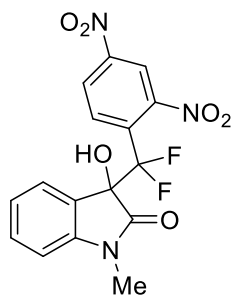

**3-((2,4-Dinitrophenyl)difluoromethyl)-3-hydroxy-1-methylindolin-2-one (3q):** pale yellow solid; 35.6 mg, 94% yield,  $^1\text{H NMR}$  (400 MHz,  $\text{DMSO-}d_6$ )  $\delta$  (ppm) 8.80 (s, 1H), 8.62 (d,  $J = 8.4$  Hz, 1H), 8.20 (d,  $J = 8.8$ , 1H), 7.63 (s, 1H), 7.45 (t,  $J = 7.4$  Hz, 1H), 7.19 (d,  $J = 6.8$ , 1H), 7.10 (d,  $J = 7.2$  Hz, 2H), 3.14 (s, 3H);  $^{13}\text{C NMR}$  (101 MHz,  $\text{DMSO-}d_6$ )  $\delta$  (ppm) 171.7 (d,  $J_{\text{C-F}} = 5.7$  Hz, 1C), 149.2, 149.0, 144.4, 132.6 (t,  $J_{\text{C-F}} = 5.3$  Hz, 1C), 131.2, 129.3 (t,  $J_{\text{C-F}} = 27.0$  Hz, 1C), 125.9, 125.3, 125.1, 122.9, 119.2, 119.1 (dd,  $J_{\text{C-F}} = 257.7, 238.2$  Hz, 1C), 109.2, 77.8 (dd,  $J_{\text{C-F}} = 32.3, 28.8$  Hz, 1C), 26.3.  $^{19}\text{F NMR}$  (376 MHz,  $\text{DMSO-}d_6$ )  $\delta$  (ppm) -100.1 (d,  $J = 264.7$  Hz, 1F), -103.2 (d,  $J = 264.7$  Hz, 1F). **HRMS (ESI)** Calcd for  $[\text{M} + \text{Na}]^+$   $\text{C}_{16}\text{H}_{11}\text{F}_2\text{N}_3\text{O}_6$ ,  $m/z$ : 402.0508, found: 402.0493.

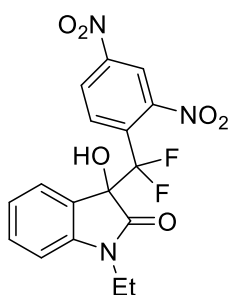

**3-((2,4-Dinitrophenyl)difluoromethyl)-1-ethyl-3-hydroxyindolin-2-one (3r):** pale yellow solid; 38.5 mg, 98% yield,  $^1\text{H NMR}$  (400 MHz,  $\text{DMSO-}d_6$ )  $\delta$  (ppm) 8.80 (d,  $J = 2.0$  Hz, 1H), 8.61 (dd,  $J = 8.8, 2.0$  Hz, 1H), 8.18 (d,  $J = 8.8$  Hz, 1H), 7.63 (d,  $J = 2.0$  Hz, 1H), 7.44 (td,  $J = 8.0, 1.2$  Hz, 1H), 7.23 (d,  $J = 7.2$  Hz, 1H), 7.14 (d,  $J = 7.6$  Hz, 1H), 7.09 (t,  $J = 7.4$  Hz, 1H), 3.78-3.60 (m, 2H), 1.15 (t,  $J = 7.2$  Hz, 3H);  $^{13}\text{C NMR}$  (101 MHz,  $\text{DMSO-}d_6$ )  $\delta$  (ppm) 171.1 (d,  $J_{\text{C-F}} = 6.7$  Hz, 1C), 149.0, 148.8, 143.2, 132.5 (t,  $J_{\text{C-F}} = 6.3$  Hz, 1C), 131.0, 129.1 (t,  $J_{\text{C-F}} = 26.0$  Hz, 1C), 126.0, 125.1, 125.1, 122.6, 119.1, 118.9 (dd,  $J_{\text{C-F}} = 257.4, 251.5$  Hz, 1C), 109.1, 77.5 (dd,  $J_{\text{C-F}} = 33.0, 27.8$  Hz, 1C), 34.4, 12.1.  $^{19}\text{F NMR}$  (376 MHz,  $\text{DMSO-}d_6$ )  $\delta$  (ppm) -99.5 (d,  $J = 265.1$  Hz, 1F), -104.0 (d,  $J = 265.1$  Hz, 1F). **HRMS (ESI)** Calcd for  $[\text{M} + \text{Na}]^+$   $\text{C}_{17}\text{H}_{13}\text{F}_2\text{N}_3\text{O}_6\text{Na}$ ,  $m/z$ : 416.0665, found: 416.0684.

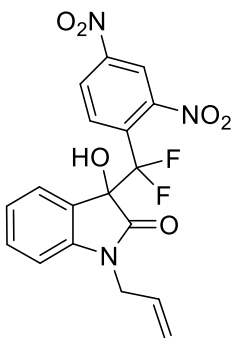

**1-Allyl-3-((2,4-dinitrophenyl)difluoromethyl)-3-hydroxyindolin-2-one (3s):** pale yellow solid; 37.2 mg, 92% yield,  $^1\text{H NMR}$  (400 MHz,  $\text{DMSO-}d_6$ )  $\delta$  (ppm) 8.83 (s, 1H), 8.63 (s, 1H), 8.20 (s, 1H), 7.74 (s, 1H), 7.42 (s, 1H), 7.20-7.03 (m, 2H), 5.82 (s, 1H), 5.19 (d,  $J = 6.4$  Hz, 2H), 4.36 (s, 1H), 4.26 (s, 1H);  $^{13}\text{C NMR}$  (101 MHz,  $\text{DMSO-}d_6$ )  $\delta$  (ppm) 171.4 (d,  $J_{\text{C-F}} = 5.9$  Hz, 1C), 149.2, 149.0, 143.4, 132.5 (t,  $J_{\text{C-F}} = 7.6$  Hz, 1C), 131.2, 131.0, 129.1 (t,  $J_{\text{C-F}} = 25.7$  Hz, 1C), 126.0, 125.3, 125.0, 122.9, 119.2, 118.9 (dd,  $J_{\text{C-F}} = 251.7, 250.0$  Hz, 1C), 117.2, 109.7, 77.7 (dd,  $J_{\text{C-F}} = 32.7, 27.4$  Hz, 1C), 41.8.  $^{19}\text{F NMR}$  (376 MHz,  $\text{DMSO-}d_6$ )  $\delta$  (ppm) -99.9 (d,  $J = 176.7$  Hz, 1F), -103.2 (d,  $J = 177.1$  Hz, 1F). **HRMS (ESI)** Calcd for  $[\text{M} + \text{Na}]^+$   $\text{C}_{18}\text{H}_{13}\text{F}_2\text{N}_3\text{O}_6\text{Na}$ ,  $m/z$ : 428.0665, found: 428.0667

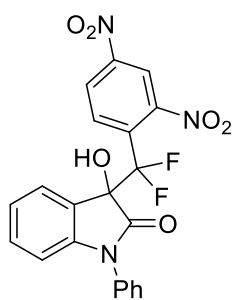

**3-((2,4-Dinitrophenyl)difluoromethyl)-3-hydroxy-1-phenylindolin-2-one (3t):** pale yellow solid; 42.8 mg, 97% yield,  $^1\text{H NMR}$  (400 MHz,  $\text{DMSO-}d_6$ )  $\delta$  (ppm) 8.84 (s, 1H), 8.64 (s, 1H), 8.24 (s, 1H), 7.89 (s, 1H), 7.61–7.19 (m, 8H), 6.82 (s, 1H);  $^{13}\text{C NMR}$  (101 MHz,  $\text{DMSO-}d_6$ )  $\delta$  (ppm) 171.0 (d,  $J_{\text{C-F}} = 5.8$  Hz, 1C), 149.1, 148.8, 144.0, 133.5, 132.5 (t,  $J_{\text{C-F}} = 5.8$  Hz, 1C), 131.1, 129.8, 129.8, 129.0 (t,  $J_{\text{C-F}} = 26.4$  Hz, 1C), 128.4, 126.3, 126.3, 126.3, 125.3, 124.9, 123.4, 119.2, 118.9 (dd,  $J_{\text{C-F}} = 257.8, 250.6$  Hz, 1C), 109.5, 77.7 (dd,  $J_{\text{C-F}} = 32.2, 27.5$  Hz, 1C).  $^{19}\text{F NMR}$  (376 MHz,  $\text{DMSO-}d_6$ )  $\delta$  (ppm) -98.9 (d,  $J = 176.3$  Hz, 1F), -103.5 (d,  $J = 177.1$  Hz, 1F). **HRMS (ESI)** Calcd for  $[\text{M} + \text{Na}]^+$   $\text{C}_{21}\text{H}_{13}\text{F}_2\text{N}_3\text{O}_6\text{Na}$ ,  $m/z$ : 464.0665, found :464.0664.

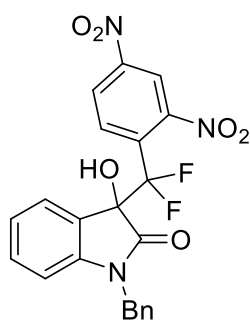

**1-Benzyl-3-((2,4-dinitrophenyl)difluoromethyl)-3-hydroxyindolin-2-one (3u):** pale yellow solid; 44.6 mg, 98% yield,  $^1\text{H NMR}$  (400 MHz,  $\text{DMSO-}d_6$ )  $\delta$  (ppm) 8.82 (s, 1H), 8.62 (d,  $J = 8.8$  Hz, 1H), 8.23 (d,  $J = 8.8$  Hz, 1H), 7.84 (s, 1H), 7.38–7.32 (m, 5H), 7.30–7.25 (m, 2H), 7.10 (t,  $J = 7.6$  Hz, 1H), 6.96 (d,  $J = 8.0$  Hz, 1H), 4.93 (dd,  $J = 36.0, 16.0$  Hz, 2H);  $^{13}\text{C NMR}$  (101 MHz,  $\text{DMSO-}d_6$ )  $\delta$  (ppm) 171.8 (d,  $J_{\text{C-F}} = 5.9$  Hz, 1C), 149.1, 149.1, 143.3, 135.6, 132.5 (t,  $J_{\text{C-F}} = 7.2$  Hz, 1C), 131.0, 129.5, 129.1, 129.1 (t,  $J_{\text{C-F}} = 27.0$  Hz, 1C), 128.6, 127.6, 127.3, 126.1, 125.2, 125.0, 122.9, 119.2, 119.0 (dd,  $J_{\text{C-F}} = 256.0, 252.6$  Hz, 1C), 109.8, 77.8 (dd,  $J_{\text{C-F}} = 32.4, 27.6$  Hz, 1C), 43.0.  $^{19}\text{F NMR}$  (376 MHz,  $\text{DMSO-}d_6$ )  $\delta$  (ppm) -99.7 (d,  $J = 265.5$  Hz, 1F), -103.3 (d,  $J = 265.1$  Hz, 1F). **HRMS (ESI)** Calcd for  $[\text{M} + \text{H}]^+$   $\text{C}_{22}\text{H}_{16}\text{F}_2\text{N}_3\text{O}_6$ ,  $m/z$ : 456.1007, found: 456.1002.

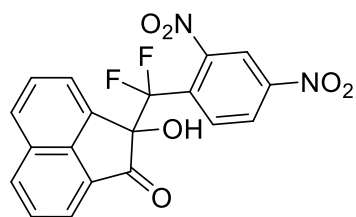

**2-((2,4-Dinitrophenyl)difluoromethyl)-2-hydroxyacenaphthylen-1(2H)-one (4a):** pale yellow solid; 35.2 mg, 88% yield,  $^1\text{H NMR}$  (400 MHz,  $\text{DMSO-}d_6$ )  $\delta$  (ppm) 8.84 (d,  $J = 2.0$  Hz, 1H), 8.67 (dd,  $J = 8.8, 2.0$  Hz, 1H), 8.38 (d,  $J = 8.0$  Hz, 1H), 8.26 (d,  $J = 8.8$  Hz, 1H), 8.15 (d,  $J = 8.4$  Hz, 1H), 8.03 (d,  $J = 6.8$  Hz, 1H), 7.89 (t,  $J = 7.6$  Hz, 1H), 7.81 (s, 1H), 7.76 (t,  $J = 7.8$  Hz, 1H), 7.48 (t,  $J = 6.8$  Hz, 1H);  $^{13}\text{C NMR}$  (101 MHz,  $\text{DMSO-}d_6$ )  $\delta$  (ppm) 196.5, 149.2, 148.5, 137.4, 135.9, 133.0 (d,  $J_{\text{C-F}} = 1.7$  Hz, 1C), 132.5 (t,  $J_{\text{C-F}} = 6.5$  Hz, 1C), 131.8, 130.3, 129.3, 128.8 (d,  $J_{\text{C-F}} = 4.6$  Hz, 1C), 128.2 (t,  $J_{\text{C-F}} = 27.3$  Hz, 1C), 127.2, 124.9, 124.6, 123.7, 119.8 (dd,  $J_{\text{C-F}} = 254.7, 252.1$  Hz, 1C), 118.8, 79.9 (dd,  $J_{\text{C-F}} = 27.5, 26.4$  Hz, 1C).  $^{19}\text{F NMR}$  (376 MHz,  $\text{DMSO-}d_6$ )  $\delta$  (ppm) -96.1 (d,  $J = 253.8$  Hz, 1F), -101.7 (d,  $J = 254.2$  Hz, 1F). **HRMS (ESI)** Calcd for  $[\text{M} + \text{Na}]^+$   $\text{C}_{19}\text{H}_{10}\text{F}_2\text{N}_2\text{O}_6\text{Na}$ ,  $m/z$ : 423.0414, found: 423.0399.

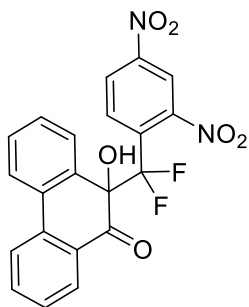

**10-((2,4-Dinitrophenyl)difluoromethyl)-10-hydroxyphenanthren-9(10H)-one (4b):** pale yellow solid; 35.1 mg, 82% yield,  $^1\text{H NMR}$  (400 MHz,  $\text{DMSO-}d_6$ )  $\delta$  (ppm) 8.70 (d,  $J = 2.0$  Hz, 1H), 8.52 (dd,  $J = 8.8, 2.0$  Hz, 1H), 8.18 (d,  $J = 8.0$  Hz, 1H), 8.12 (d,  $J = 7.6$  Hz, 1H), 7.87 (dd,  $J = 7.6, 0.8$  Hz, 1H), 7.83-7.78 (m, 2H), 7.56-7.50 (m, 2H), 7.36 (s, 1H), 7.31 (t,  $J = 7.6$  Hz, 1H), 7.19 (d,  $J = 8.0$  Hz, 1H);  $^{13}\text{C NMR}$  (101 MHz,  $\text{DMSO-}d_6$ )  $\delta$  (ppm) 198.7 (d,  $J_{\text{C-F}} = 3.8$  Hz, 1C), 149.3, 148.7, 141.9, 134.6, 132.6, 132.6, 132.5 (t,  $J_{\text{C-F}} = 7.9$  Hz, 1C), 130.6, 130.2, 129.3 (t,  $J_{\text{C-F}} = 27.8$  Hz, 1C), 129.0, 129.0, 128.9, 126.7, 125.5, 123.1, 122.3, 119.4 (dd,  $J_{\text{C-F}} = 251.4, 250.2$  Hz, 1C), 119.3, 81.0 (dd,  $J_{\text{C-F}} = 31.5, 27.1$  Hz, 1C).  $^{19}\text{F NMR}$  (376 MHz,  $\text{DMSO-}d_6$ )  $\delta$  (ppm) -98.3 (d,  $J = 265.8$  Hz, 1F), -101.3 (d,  $J = 265.8$  Hz, 1F). **HRMS (ESI)**  $[\text{M} + \text{Na}]^+$  Calcd for  $\text{C}_{21}\text{H}_{12}\text{F}_2\text{N}_2\text{O}_6\text{Na}$ ,  $m/z$ : 449.0571, found: 449.0556.

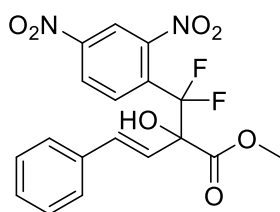

**Methyl (E)-2-((2,4-dinitrophenyl)difluoromethyl)-2-hydroxy-4-phenylbut-3-enoate (4c):** pale yellow oil; 20.8 mg, 51% yield,  $^1\text{H NMR}$  (400 MHz,  $\text{DMSO-}d_6$ )  $\delta$  (ppm) 8.80 (d,  $J = 2.4$  Hz, 1H), 8.52 (dd,  $J = 8.8, 2.0$  Hz, 1H), 8.04 (d,  $J = 9.2$  Hz, 1H), 7.46 (d,  $J = 7.2$  Hz, 1H), 7.43 (s, 1H), 7.35 (t,  $J = 7.2$  Hz, 2H), 7.31-7.27 (m, 1H), 6.68 (d,  $J = 16.0$  Hz, 1H), 6.52 (d,  $J = 16.0$  Hz, 1H), 3.80 (s, 3H);  $^{13}\text{C NMR}$  (101 MHz,  $\text{DMSO-}d_6$ )  $\delta$  (ppm) 168.9, 149.1, 148.7, 135.2, 133.3, 132.4 (t,  $J_{\text{C-F}} = 6.5$  Hz, 1C), 129.1 (t,  $J_{\text{C-F}} = 27.0$  Hz, 1C), 128.7, 128.7, 128.5, 127.0, 127.0, 125.1, 122.8 (d,  $J_{\text{C-F}} = 4.1$  Hz, 1C), 119.4 (t,  $J_{\text{C-F}} = 258.5$  Hz, 1C), 119.0, 79.9 (t,  $J_{\text{C-F}} = 27.7$  Hz, 1C), 53.4.  $^{19}\text{F NMR}$  (376 MHz,  $\text{DMSO-}d_6$ )  $\delta$  (ppm) -97.3 (d,  $J = 258.7$  Hz, 1F), -101.4 (d,  $J = 258.3$  Hz, 1F). **HRMS (ESI)**  $[\text{M} + \text{H}]^+$  Calcd for  $\text{C}_{18}\text{H}_{15}\text{F}_2\text{N}_2\text{O}_7$ ,  $m/z$ : 409.0832, found: 409.0842.

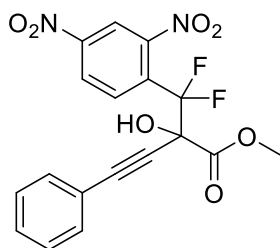

**Methyl 2-((2,4-dinitrophenyl)difluoromethyl)-2-hydroxy-4-phenylbut-3-ynoate (4d):** pale yellow solid; 26.9 mg, 66% yield,  $^1\text{H NMR}$  (400 MHz,  $\text{DMSO-}d_6$ )  $\delta$  (ppm) 8.87 (d,  $J = 2.4$  Hz, 1H), 8.63 (dd,  $J = 8.8, 2.4$  Hz, 1H), 8.20 (d,  $J = 8.8$  Hz, 1H), 8.16 (s, 1H), 7.51-7.41 (m, 5H), 3.81 (s, 3H);  $^{13}\text{C NMR}$  (101 MHz,  $\text{DMSO-}d_6$ )  $\delta$  (ppm) 166.3, 149.3, 148.9, 132.2 (t,  $J_{\text{C-F}} = 6.5$  Hz, 1C), 131.7, 131.7, 129.8, 128.8, 128.8, 128.7 (t,  $J_{\text{C-F}} = 26.8$  Hz, 1C), 125.4, 120.3, 119.3, 117.9 (t,  $J_{\text{C-F}} = 259.0$  Hz, 1C), 87.4, 83.1 (d,  $J_{\text{C-F}} = 5.3$  Hz, 1C), 74.8 (dd,  $J_{\text{C-F}} = 31.9, 29.5$  Hz, 1C), 53.9.  $^{19}\text{F NMR}$  (376 MHz,  $\text{DMSO-}d_6$ )  $\delta$  (ppm) -98.2 (d,  $J = 255.7$  Hz, 1F), -101.0 (d,  $J = 255.7$  Hz, 1F). **HRMS (ESI)**  $[\text{M} + \text{H}]^+$  Calcd for  $\text{C}_{18}\text{H}_{13}\text{F}_2\text{N}_2\text{O}_7$ ,  $m/z$ : 407.0691, found: 407.0685.

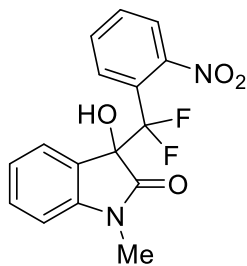

**3-(Difluoro(4-fluoro-2-nitrophenyl)methyl)-3-hydroxy-1-methylindolin-2-one (5a):** pale yellow oil; 6.8 mg, 20% yield,  $^1\text{H NMR}$  (400 MHz,  $\text{DMSO-}d_6$ )  $\delta$  (ppm) 7.88-7.84 (m, 1H), 7.79-7.76 (m, 3H), 7.43-7.39 (m, 2H), 7.06-7.03 (m, 3H), 3.11 (s, 3H);  $^{13}\text{C NMR}$  (101 MHz,  $\text{DMSO-}d_6$ )  $\delta$  (ppm) 171.9 (d,  $J_{\text{C-F}} = 6.1$  Hz, 1C), 148.8 (t,  $J_{\text{C-F}} = 2.6$  Hz, 1C), 144.2, 132.3, 130.7, 130.6, 130.2 (t,  $J_{\text{C-F}} = 7.2$  Hz, 1C), 125.6, 125.4, 123.5 (t,  $J_{\text{C-F}} = 26.6$  Hz, 1C), 123.5, 122.5, 119.3 (t,  $J_{\text{C-F}} = 253.4$  Hz, 1C), 108.8, 77.7 (t,  $J_{\text{C-F}} = 30.6$  Hz, 1C), 26.1.  $^{19}\text{F NMR}$  (376 MHz,  $\text{DMSO-}d_6$ )  $\delta$  (ppm) -99.9 (d,  $J = 263.2$  Hz, 1F), -101.7 (d,  $J = 263.2$  Hz, 1F). **HRMS (ESI)** Calcd for  $[\text{M} + \text{H}]^+$   $\text{C}_{16}\text{H}_{13}\text{F}_2\text{N}_2\text{O}_4$ ,  $m/z$ : 335.0829, found: 335.0838.

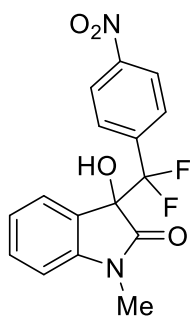

**3-(Difluoro(4-fluoro-2-nitrophenyl)methyl)-3-hydroxy-1-methylindolin-2-one (5b):** pale yellow solid; 33.0 mg, 99% yield,  $^1\text{H NMR}$  (400 MHz,  $\text{DMSO-}d_6$ )  $\delta$  (ppm) 8.27 (d,  $J = 8.8$  Hz, 2H), 7.59 (d,  $J = 8.8$  Hz, 2H), 7.40 (td,  $J = 7.6, 1.2$  Hz, 1H), 7.37 (s, 1H), 7.19 (d,  $J = 7.2$  Hz, 1H), 7.08 (td,  $J = 7.6, 0.8$  Hz, 1H), 7.00 (d,  $J = 8.0$  Hz, 1H), 3.05 (s, 3H);  $^{13}\text{C NMR}$  (101 MHz,  $\text{DMSO-}d_6$ )  $\delta$  (ppm) 172.0, 148.7, 144.0, 138.5 (t,  $J_{\text{C-F}} = 26.0$  Hz, 1C), 130.8, 128.7 (t,  $J_{\text{C-F}} = 6.4$  Hz, 1C), 128.7 (t,  $J_{\text{C-F}} = 6.4$  Hz, 1C), 125.8, 125.4, 122.7, 122.7, 122.6, 119.7 (d,  $J_{\text{C-F}} = 253.3$  Hz, 1C), 108.9, 77.3 (dd,  $J_{\text{C-F}} = 30.2, 28.6$  Hz, 1C), 26.0.  $^{19}\text{F NMR}$  (376 MHz,  $\text{DMSO-}d_6$ )  $\delta$  (ppm) -105.6 (d,  $J = 250.0$  Hz, 1F), -107.3 (d,  $J = 250.4$  Hz, 1F). **HRMS (ESI)** Calcd for  $[\text{M} - \text{H}]^-$   $\text{C}_{16}\text{H}_{11}\text{F}_2\text{N}_2\text{O}_4$ ,  $m/z$ : 333.0682, found: 333.0692.

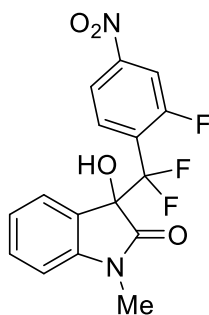

**3-(Difluoro(4-fluoro-2-nitrophenyl)methyl)-3-hydroxy-1-methylindolin-2-one (5c):** white solid; 30.8 mg, 87% yield,  $^1\text{H NMR}$  (400 MHz,  $\text{DMSO-}d_6$ )  $\delta$  (ppm) 8.16 (s, 2H), 7.74 (s, 1H), 7.41 (d,  $J = 22.8$  Hz, 2H), 7.38 (s, 1H), 7.10 (d,  $J = 18.8$  Hz, 2H), 3.13 (s, 3H);  $^{13}\text{C NMR}$  (101 MHz,  $\text{DMSO-}d_6$ )  $\delta$  (ppm) 171.8 (d,  $J = 5.4$  Hz, 1C), 159.2 (d,  $J_{\text{C-F}} = 259.6$  Hz, 1C), 149.8 (d,  $J_{\text{C-F}} = 9.1$  Hz, 1C), 144.2, 131.9 (t,  $J_{\text{C-F}} = 7.4$  Hz, 1C), 130.8, 126.0, 125.3, 122.6, 119.6 (t,  $J_{\text{C-F}} = 255.1$  Hz, 1C), 118.4 (d,  $J_{\text{C-F}} = 2.5$  Hz, 1C), 112.2, 111.9, 108.9, 77.3 (dd,  $J_{\text{C-F}} = 32.7, 27.7$  Hz, 1C), 26.2.  $^{19}\text{F NMR}$  (376 MHz,  $\text{DMSO-}d_6$ )  $\delta$  (ppm) -102.7 (dd,  $J = 259.8, 21.8$  Hz, 1F), -105.6 (dd,  $J = 260.2, 29.3$  Hz, 1F), -106.3 (dd,  $J = 29.0, 22.2$  Hz, 1F). **HRMS (ESI)** Calcd for  $[\text{M} - \text{H}]^-$   $\text{C}_{16}\text{H}_{10}\text{F}_3\text{N}_2\text{O}_4$ ,  $m/z$ : 351.0598, found: 351.0598.

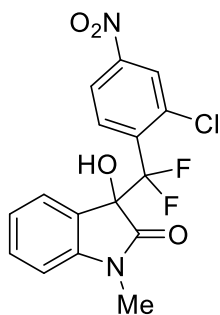

**3-(Difluoro(4-fluoro-2-nitrophenyl)methyl)-3-hydroxy-1-methylindolin-2-one (5d):** pale yellow solid; 29.2 mg, 79% yield,  $^1\text{H NMR}$  (400 MHz,  $\text{DMSO-}d_6$ )  $\delta$  (ppm) 8.28 (d,  $J = 12.4$  Hz, 1H), 8.27 (s, 1H), 7.86 (d,  $J = 8.4$  Hz, 1H), 7.44 (t,  $J = 7.6$  Hz, 1H), 7.35 (s, 1H), 7.27 (d,  $J = 7.2$  Hz, 1H), 7.09 (dd,  $J = 14.0, 7.2$  Hz, 2H), 3.13 (s, 3H);  $^{13}\text{C NMR}$  (101 MHz,  $\text{DMSO-}d_6$ )  $\delta$  (ppm) 171.9 (d,  $J = 5.6$  Hz, 1C), 148.9, 144.2, 135.5 (t,  $J_{\text{C-F}} = 24.7$  Hz, 1C), 133.4, 132.8 (t,  $J_{\text{C-F}} = 8.3$  Hz, 1C), 130.8, 126.0, 125.6, 125.3, 122.6, 121.0, 119.9 (dd,  $J_{\text{C-F}} = 255.8, 253.8$  Hz, 1C), 108.9, 77.6 (dd,  $J_{\text{C-F}} = 31.9, 28.1$  Hz, 1C), 26.2.  $^{19}\text{F NMR}$  (376 MHz,  $\text{DMSO-}d_6$ )  $\delta$  (ppm) -100.4 (d,  $J = 258.7$  Hz, 1F), -102.5 (d,  $J = 258.7$  Hz, 1F). **HRMS (ESI)** Calcd for  $[\text{M} - \text{H}]^-$   $\text{C}_{16}\text{H}_{10}\text{ClF}_2\text{N}_2\text{O}_4$ ,  $m/z$ : 367.0300, found: 367.0303.

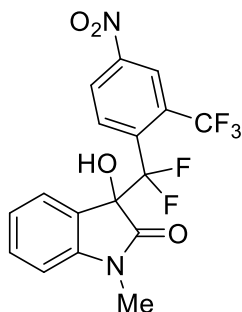

**3-(Difluoro(4-fluoro-2-nitrophenyl)methyl)-3-hydroxy-1-methylindolin-2-one (5e):** white solid; 30.2 mg, 75% yield,  $^1\text{H NMR}$  (400 MHz,  $\text{DMSO-}d_6$ )  $\delta$  (ppm) 8.72 (d,  $J = 8.8$  Hz, 1H), 8.52 (d,  $J = 2.0$  Hz, 1H), 8.31 (d,  $J = 8.8$  Hz, 1H), 7.52 (d,  $J = 0.8$  Hz, 1H), 7.45 (dt,  $J = 7.6, 0.8$  Hz, 1H), 7.20 (d,  $J = 7.2$  Hz, 1H), 7.12-7.07 (m, 2H), 3.12 (s, 3H);  $^{13}\text{C NMR}$  (101 MHz,  $\text{DMSO-}d_6$ )  $\delta$  (ppm) 171.8 (d,  $J_{\text{C-F}} = 6.4$  Hz, 1C), 148.5, 144.2, 136.5 (dd,  $J_{\text{C-F}} = 28.0, 25.9$  Hz, 1C), 133.7 (t,  $J_{\text{C-F}} = 7.8$  Hz, 1C), 130.9, 128.2 (d,  $J_{\text{C-F}} = 33.5$  Hz, 1C), 126.5, 125.6, 125.5, 122.6, 122.1 (d,  $J_{\text{C-F}} = 275.8$  Hz, 1C), 121.7 (q,  $J_{\text{C-F}} = 7.2$  Hz, 1C), 119.5 (dd,  $J_{\text{C-F}} = 254.3, 252.3$  Hz, 1C), 109.0, 77.6 (dd,  $J_{\text{C-F}} = 32.9, 28.2$  Hz, 1C), 26.1.  $^{19}\text{F NMR}$  (376 MHz,  $\text{DMSO-}d_6$ )  $\delta$  (ppm) -57.0 (dd,  $J = 27.1, 15.8$  Hz, 3F), -97.8 (dq,  $J = 263.8, 15.0$  Hz, 1F), -102.1 (dq,  $J = 264.0, 27.1$  Hz, 1F). **HRMS (ESI)** Calcd for  $[\text{M} - \text{H}]^-$   $\text{C}_{17}\text{H}_{10}\text{F}_5\text{N}_2\text{O}_4$ ,  $m/z$ : 401.0564, found: 401.0566.

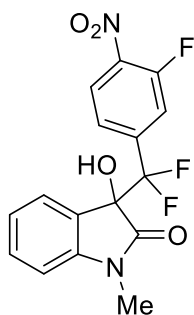

**3-(Difluoro(4-fluoro-2-nitrophenyl)methyl)-3-hydroxy-1-methylindolin-2-one (5f):** pale yellow solid; 30.4 mg, 86% yield,  $^1\text{H NMR}$  (400 MHz,  $\text{DMSO-}d_6$ )  $\delta$  (ppm) 8.24 (t,  $J = 8.2$  Hz, 1H), 7.49 (dd,  $J = 12.0, 1.6$  Hz, 1H), 7.45-7.41 (m, 3H), 7.24 (d,  $J = 7.2$  Hz, 1H), 7.11 (dt,  $J = 7.2, 0.8$  Hz, 1H), 7.05 (d,  $J = 8.0$  Hz, 1H), 3.09 (s, 3H);  $^{13}\text{C NMR}$  (101 MHz,  $\text{DMSO-}d_6$ )  $\delta$  (ppm) 171.8 (d,  $J_{\text{C-F}} = 4.0$  Hz, 1C), 153.5 (d,  $J_{\text{C-F}} = 262.7$  Hz, 1C), 144.1, 139.8 (d,  $J_{\text{C-F}} = 8.0$  Hz, 1C), 138.0-137.9 (m, 1C), 130.9, 125.8, 125.7 (d,  $J_{\text{C-F}} = 2.3$  Hz, 1C), 125.2, 124.2-124.0 (m, 1C), 122.7, 119.0 (t,  $J_{\text{C-F}} = 253.0$  Hz, 1C), 117.5 (dt,  $J_{\text{C-F}} = 23.3, 6.5$  Hz, 1C), 109.0, 77.1 (dd,  $J_{\text{C-F}} = 31.3, 28.2$  Hz, 1C), 26.1.  $^{19}\text{F NMR}$  (376 MHz,  $\text{DMSO-}d_6$ )  $\delta$  (ppm) -105.3 (d,  $J = 251.5$  Hz, 1F), -107.4 (d,  $J = 251.9$  Hz, 1F), -119.0 (s, 1F). **HRMS (ESI)** Calcd for  $[\text{M} - \text{H}]^-$   $\text{C}_{16}\text{H}_{10}\text{F}_3\text{N}_2\text{O}_4$ ,  $m/z$ : 351.0595, found: 351.0598.



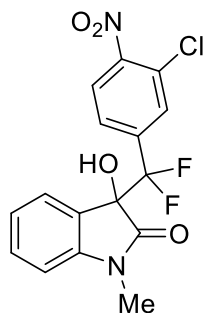

**3-(Difluoro(4-fluoro-2-nitrophenyl)methyl)-3-hydroxy-1-methylindolin-2-one (5g):** white solid; 36.2 mg, 98% yield,  $^1\text{H}$  NMR (400 MHz,  $\text{DMSO-}d_6$ )  $\delta$  (ppm) 8.16 (d,  $J = 8.4$  Hz, 1H), 7.66 (s, 1H), 7.59 (d,  $J = 8.4$  Hz, 1H), 7.46 (s, 1H), 7.44 (t,  $J = 8.0$  Hz, 1H), 7.31 (d,  $J = 7.2$  Hz, 1H), 7.12 (t,  $J = 7.4$  Hz, 1H), 7.05 (d,  $J = 7.6$  Hz, 1H), 3.10 (s, 3H);  $^{13}\text{C}$  NMR (101 MHz,  $\text{DMSO-}d_6$ )  $\delta$  (ppm) 171.8 (d,  $J_{\text{C-F}} = 4.7$  Hz, 1H), 148.6, 144.1, 137.5 (t,  $J_{\text{C-F}} = 26.3$  Hz, 1C), 130.9, 130.2 (t,  $J_{\text{C-F}} = 6.6$  Hz, 1C), 127.6 (t,  $J_{\text{C-F}} = 6.4$  Hz, 1C), 125.9, 125.3, 125.0, 124.3, 122.7, 119.1 (dd,  $J_{\text{C-F}} = 255.7, 251.4$  Hz, 1C), 109.0, 77.1 (dd,  $J_{\text{C-F}} = 31.9, 28.0$  Hz, 1C), 26.1.  $^{19}\text{F}$  NMR (376 MHz,  $\text{DMSO-}d_6$ )  $\delta$  (ppm) -104.7 (d,  $J = 253.0$  Hz, 1F), -107.7 (d,  $J = 252.7$  Hz, 1F). HRMS (ESI) Calcd for  $[\text{M} - \text{H}]^-$   $\text{C}_{16}\text{H}_{10}\text{ClF}_2\text{N}_2\text{O}_4$ ,  $m/z$ : 367.0300, found: 367.0303.

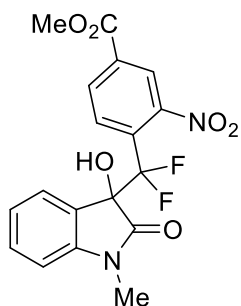

**1-Benzyl-3-((2,4-dinitrophenyl)difluoromethyl)-3-hydroxyindolin-2-one (5h):** white solid; 35.4 mg, 90% yield,  $^1\text{H}$  NMR (400 MHz,  $\text{DMSO-}d_6$ )  $\delta$  (ppm) 8.31 (d,  $J = 10.4$  Hz, 1H), 8.30 (s, 1H), 8.04 (d,  $J = 8.0$  Hz, 1H), 7.55 (s, 1H), 7.43 (td,  $J = 7.6, 1.2$  Hz, 1H), 7.13-7.05 (m, 3H), 3.93 (s, 3H), 3.13 (s, 3H);  $^{13}\text{C}$  NMR (101 MHz,  $\text{DMSO-}d_6$ )  $\delta$  (ppm) 171.7 (d,  $J_{\text{C-F}} = 5.5$  Hz, 1C), 164.0, 149.0, 144.2, 133.2, 131.3 (t,  $J_{\text{C-F}} = 7.0$  Hz, 1C), 130.9, 130.9, 127.6 (d,  $J_{\text{C-F}} = 26.7$  Hz, 1C), 125.7, 125.2, 124.0, 122.7, 119.1 (dd,  $J_{\text{C-F}} = 255.1, 251.9$  Hz, 1C), 109.0, 77.7 (dd,  $J_{\text{C-F}} = 32.0, 28.3$  Hz, 1C), 53.0, 26.2.  $^{19}\text{F}$  NMR (376 MHz,  $\text{DMSO-}d_6$ )  $\delta$  (ppm) -100.0 (d,  $J = 264.0$  Hz, 1F), -102.8 (d,  $J = 264.0$  Hz, 1F). HRMS (ESI) Calcd for  $[\text{M} + \text{H}]^+$   $\text{C}_{18}\text{H}_{15}\text{F}_2\text{N}_2\text{O}_6$ ,  $m/z$ : 393.0904, found: 393.0893.

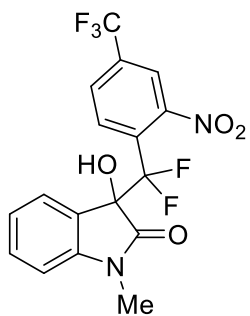

**3-(Difluoro(2-nitro-4-(trifluoromethyl)phenyl)methyl)-3-hydroxy-1-methylindolin-2-one (5i):** pale yellow solid; 27.5 mg, 68% yield,  $^1\text{H}$  NMR (400 MHz,  $\text{DMSO-}d_6$ )  $\delta$  (ppm) 8.43 (s, 1H), 8.23 (d,  $J = 8.4$  Hz, 1H), 8.13 (d,  $J = 8.4$  Hz, 1H), 7.58 (d,  $J = 1.6$  Hz, 1H), 7.44 (td,  $J = 7.6, 1.2$  Hz, 1H), 7.21 (d,  $J = 7.6$  Hz, 1H), 7.10 (t,  $J = 7.0$  Hz, 2H), 3.13 (s, 3H);  $^{13}\text{C}$  NMR (101 MHz,  $\text{DMSO-}d_6$ )  $\delta$  (ppm) 171.6 (d,  $J_{\text{C-F}} = 6.2$  Hz, 1C), 149.0, 144.2, 132.5, 132.1, 132.0 (d,  $J_{\text{C-F}} = 6.9$  Hz, 1C), 131.0, 127.5 (dd,  $J_{\text{C-F}} = 28.4, 25.6$  Hz, 1C), 125.7, 125.1, 122.7, 122.6 (q,  $J_{\text{C-F}} = 274.6$  Hz, 1C), 121.0 (d,  $J_{\text{C-F}} = 3.6$  Hz, 1C), 118.9 (dd,  $J_{\text{C-F}} = 256.0, 250.4$  Hz, 1C), 109.0, 77.6 (dd,  $J_{\text{C-F}} = 32.7, 27.6$  Hz, 1C), 26.2.  $^{19}\text{F}$  NMR (376 MHz,  $\text{DMSO-}d_6$ )  $\delta$  (ppm) -61.7 (s, 3F), -99.6 (d,  $J = 264.7$  Hz, 1F), -103.5 (d,  $J = 264.7$  Hz, 1F). HRMS (ESI) Calcd for  $[\text{M} + \text{Na}]^+$   $\text{C}_{17}\text{H}_{11}\text{F}_5\text{N}_2\text{O}_4\text{Na}$ ,  $m/z$ : 425.0532, found: 425.0531.

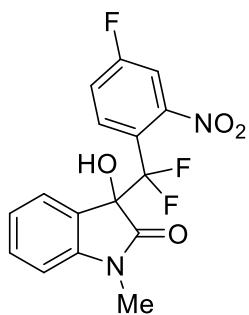

**3-(Difluoro(4-fluoro-2-nitrophenyl)methyl)-3-hydroxy-1-methylindolin-2-one (5j):** white solid; 21.6 mg, 61% yield,  $^1\text{H}$  NMR (400 MHz,  $\text{DMSO-}d_6$ )  $\delta$  (ppm) 8.02 (d,  $J = 7.6$  Hz, 2H), 7.98 (d,  $J = 8.8$  Hz, 1H), 7.80-7.76 (m, 2H), 7.64 (t,  $J = 7.8$  Hz, 2H), 7.53 (dd,  $J = 8.8, 2.4$  Hz, 1H), 3.95 (s, 3H);  $^{13}\text{C}$  NMR (101 MHz,  $\text{DMSO-}d_6$ )  $\delta$  (ppm) 187.3 (t,  $J_{\text{C-F}} = 31.6$  Hz, 1C), 161.7, 147.5, 134.6, 131.7 (t,  $J_{\text{C-F}} = 2.5$  Hz, 1C), 131.3 (d,  $J_{\text{C-F}} = 295.5$  Hz, 1C), 129.6 (t,  $J_{\text{C-F}} = 9.6$  Hz, 1C), 129.4 (t,  $J_{\text{C-F}} = 2.5$  Hz, 1C), 129.1, 129.1, 128.4 (t,  $J_{\text{C-F}} = 152.1$  Hz, 1C), 119.5, 118.6 (t,  $J_{\text{C-F}} = 25.5$  Hz, 1C), 116.2 (t,  $J_{\text{C-F}} = 256.0$  Hz, 1C), 111.4, 56.5.  $^{19}\text{F}$  NMR (376 MHz,  $\text{DMSO-}d_6$ )  $\delta$  (ppm) -59.1 (s, 1F), -93.0 (s, 2F). HRMS (ESI) Calcd for  $[\text{M} + \text{H}]^+$   $\text{C}_{16}\text{H}_{12}\text{F}_3\text{N}_2\text{O}_4$ ,  $m/z$ : 353.0746, found: 353.0744.

## Control reactions

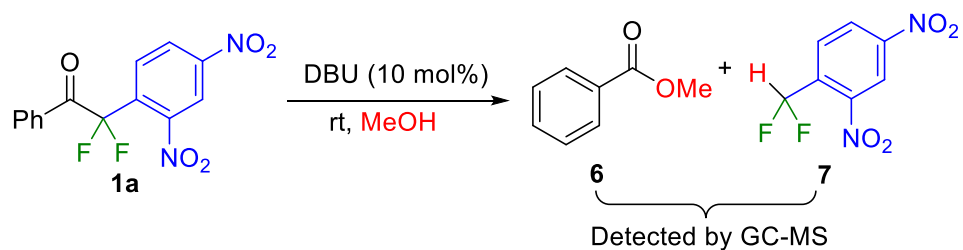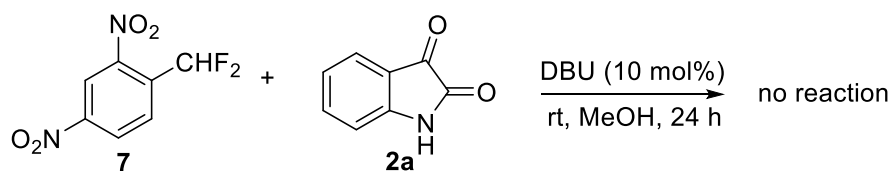

## GC-MS Spectrum and the characterization data of 7

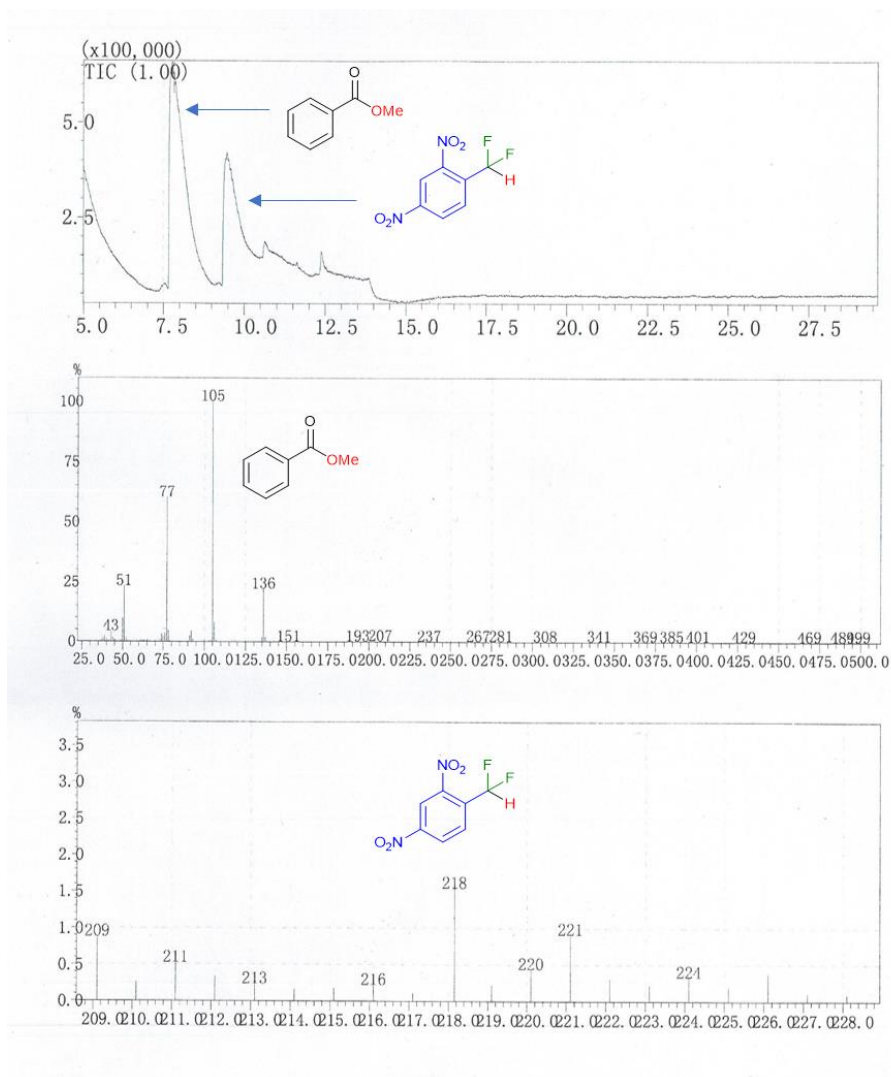

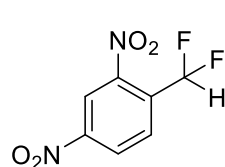

**1-(Difluoromethyl)-2,4-dinitrobenzene (7):** yellow oil,  $^1\text{H}$  NMR (400 MHz,  $\text{CDCl}_3$ )  $\delta$  (ppm) 8.98 (t,  $J = 1.0$  Hz, 1H), 8.62 (dd,  $J = 8.4, 2.0$  Hz, 1H), 8.15 (d,  $J = 8.4$  Hz, 1H), 7.45 (t,  $J = 54.2$  Hz, 1H);  $^{13}\text{C}$  NMR (101 MHz,  $\text{CDCl}_3$ )  $\delta$  (ppm) 149.2, 147.6, 134.6, 129.2 (t,  $J_{\text{C-F}} = 8.0$  Hz, 1C), 128.2, 120.7, 109.7 (t,  $J_{\text{C-F}} = 243.7$  Hz, 1C).  $^{19}\text{F}$  NMR (376 MHz,  $\text{CDCl}_3$ )  $\delta$  (ppm) -115.6 (s, 1F), -115.8 (s, 1F).

### Gram-scale synthesis of **3q**

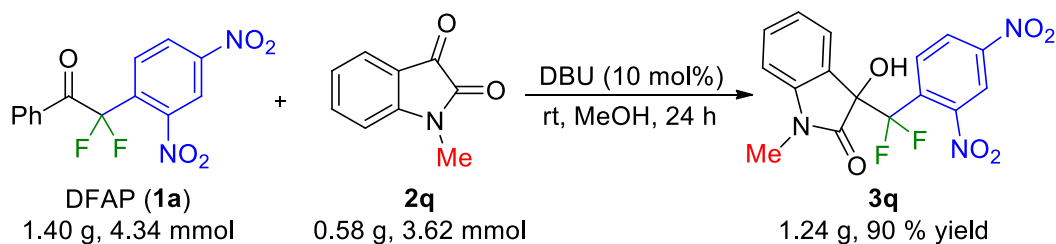

To a solution of **1a** (1.40 g, 4.34 mmol), **2q** (0.58 g, 3.62 mmol) and 18 mL MeOH, DBU (542  $\mu\text{L}$ , 10 mol%) was added at room temperature and the mixture was stirred for 12 h at the same temperature. Subsequently, the reaction mixture was concentrated and purified by gel chromatography (PE/acetone = 4/1, v/v) to afford product **3q**.

### Transformations of **3q**

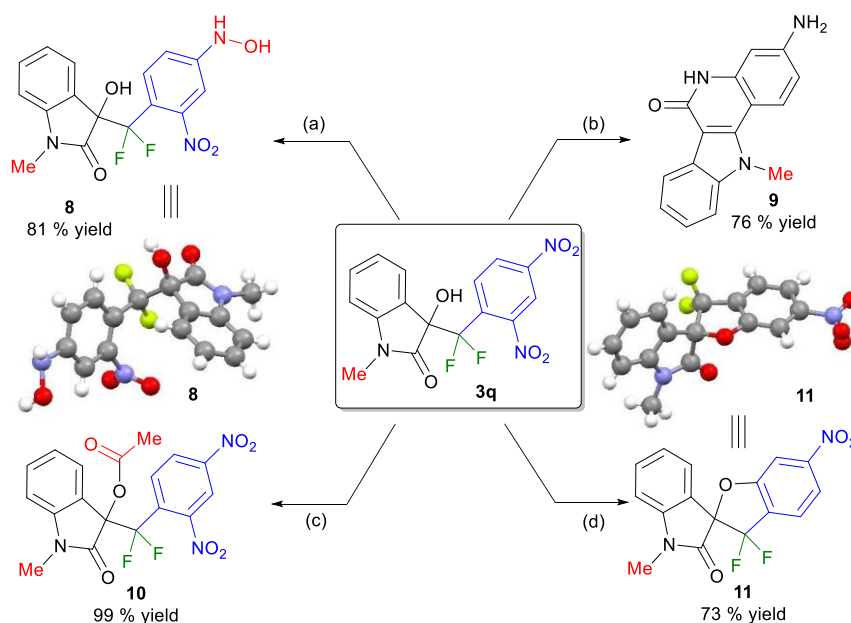

(a) To the solution of **3q** (76 mg, 0.20 mmol) in 2.0 mL ethanol, Pd/C (6 mg, 3 mol%, 10 wt% in charcoal) was added, the reaction was performed at 0 °C under 1 atm  $\text{H}_2$  for 1 h. Then the mixture was filtered and concentrated in vacuum. The crude product was purified by flash chromatography (PE/Acetone = 2/1) to give a yellow solid.

**3-(Difluoro(4-(hydroxyamino)-2-nitrophenyl)methyl)-3-hydroxy-1-methylindolin-2-one (8):** yellow solid; 59.0 mg, 81 % yield,  $^1\text{H}$  NMR (400 MHz,  $\text{Acetone-}d_6$ )  $\delta$  (ppm) 8.58 (s, 1H), 8.25 (s, 1H), 7.70 (d,  $J = 8.8$ , 1H), 7.39 (dt,  $J = 7.8,$

1.2 Hz, 1H), 7.16 (d,  $J = 8.8$  Hz, 1H), 7.12 (d,  $J = 7.2$  Hz, 1H), 7.08 (d,  $J = 2.0$  Hz, 1H), 7.03 (dt,  $J = 7.4, 0.4$  Hz, 1H), 6.98 (d,  $J = 8.0$  Hz, 1H), 6.11 (s, 1H), 3.16 (s, 3H);  $^{13}\text{C}$  NMR (101 MHz, Acetone- $d_6$ )  $\delta$  (ppm) 172.5, 154.9, 150.6, 145.0, 131.1 (t,  $J_{\text{C-F}} = 6.9$  Hz, 1C), 131.0, 126.1, 125.8, 122.7, 125.1, 120.1, 114.4 (t,  $J_{\text{C-F}} = 27.2$  Hz, 1C), 113.7, 108.7, 106.8, 78.6 (t,  $J_{\text{C-F}} = 31.4$  Hz, 1C), 25.9.  $^{19}\text{F}$  NMR (376 MHz, Acetone- $d_6$ )  $\delta$  (ppm) -101.0 (s, 2F). HRMS (ESI) Calcd for  $[\text{M} + \text{Na}]^+$   $\text{C}_{16}\text{H}_{13}\text{F}_2\text{N}_3\text{O}_5\text{Na}$ ,  $m/z$ : 388.0727, found: 388.0716.

(b) The mixture of **3q** (38 mg, 0.10 mmol), Pd/C (10 mg, 10 mol %, 10 wt % in charcoal) and ethanol (1.0 mL) was stirred at room temperature under 1 atm  $\text{H}_2$  for 3 h. The mixture was filtered and concentrated in vacuum. The crude product was purified by flash chromatography (PE/Acetone = 1/1) to give a yellow solid. **3-Amino-11-methyl-5,11-dihydro-6H-indolo[3,2-c]quinolin-6-one (9)**: yellow solid; 20.0 mg, 76 % yield,  $^1\text{H}$  NMR (400 MHz, DMSO- $d_6$ )  $\delta$  (ppm) 11.11 (s, 1H), 8.18 (d,  $J = 7.2$ , 1H), 8.10 (d,  $J = 8.4$ , 1H), 7.65 (d,  $J = 8.4$  Hz, 1H), 7.33-7.29 (m, 1H), 7.23-7.19 (m, 1H), 6.59 (s, 1H), 6.58 (dd,  $J = 10.4, 2.0$  Hz, 1H), 5.77 (s, 2H), 4.19 (s, 3H);  $^{13}\text{C}$  NMR (101 MHz, DMSO- $d_6$ )  $\delta$  (ppm) 159.8, 149.9, 141.8, 140.8, 139.0, 124.1, 124.0, 122.7, 120.8, 120.1, 110.2, 109.5, 103.4, 102.5, 98.2, 33.1. HRMS (ESI) Calcd for  $[\text{M} + \text{Na}]^+$   $\text{C}_{16}\text{H}_{13}\text{N}_3\text{ONa}$ ,  $m/z$ : 286.0955, found: 286.0951.

## 2D NMR spectrums of **9**

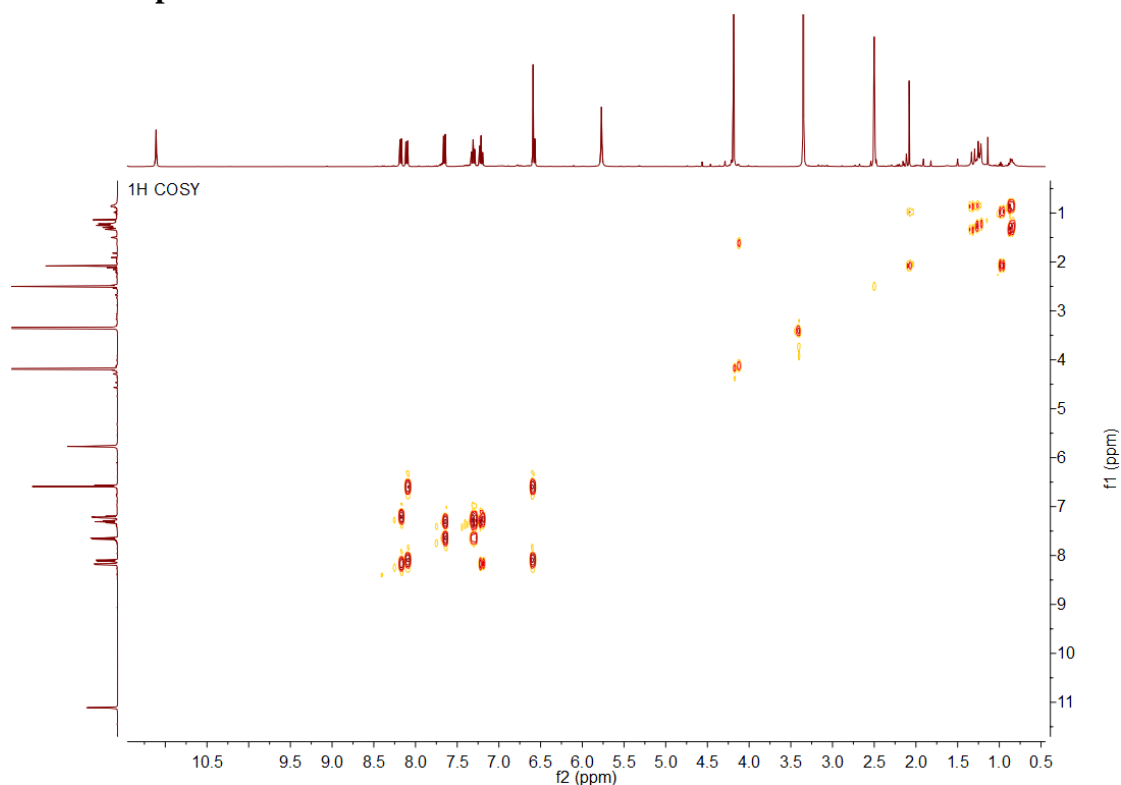

H-H COSY of **9** in DMSO- $d_6$

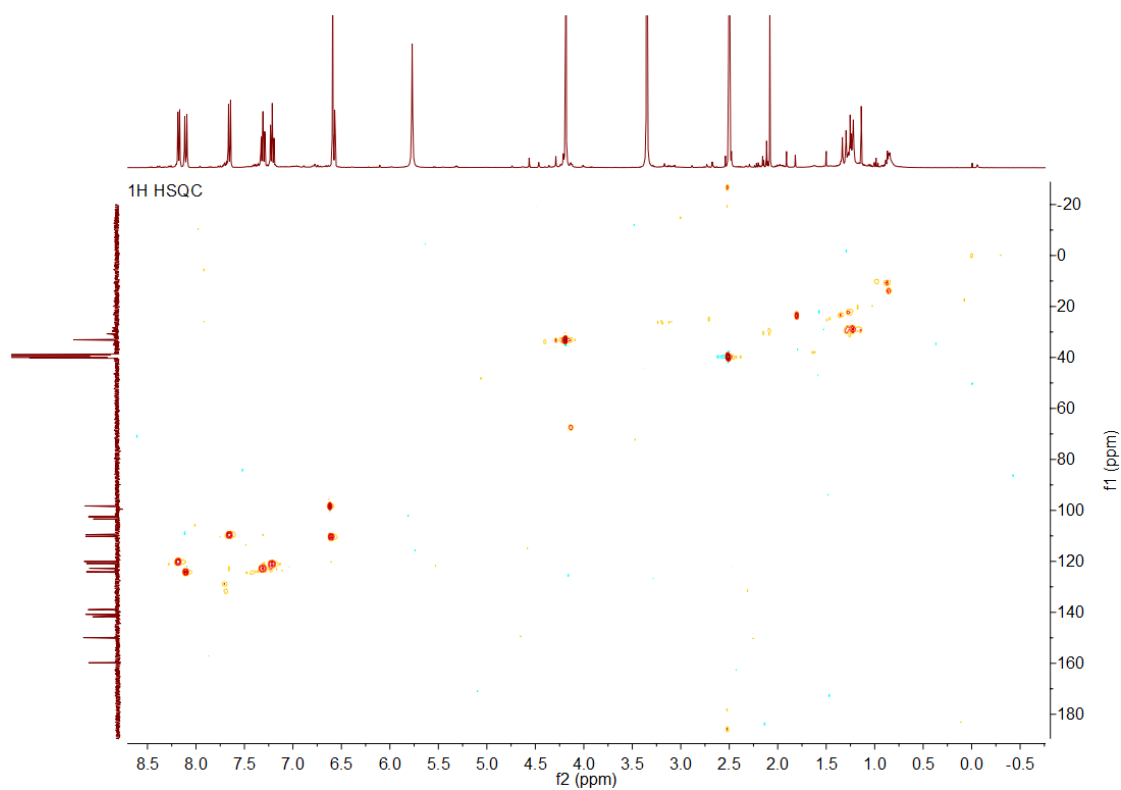

HSQC of **9** in DMSO- $d_6$

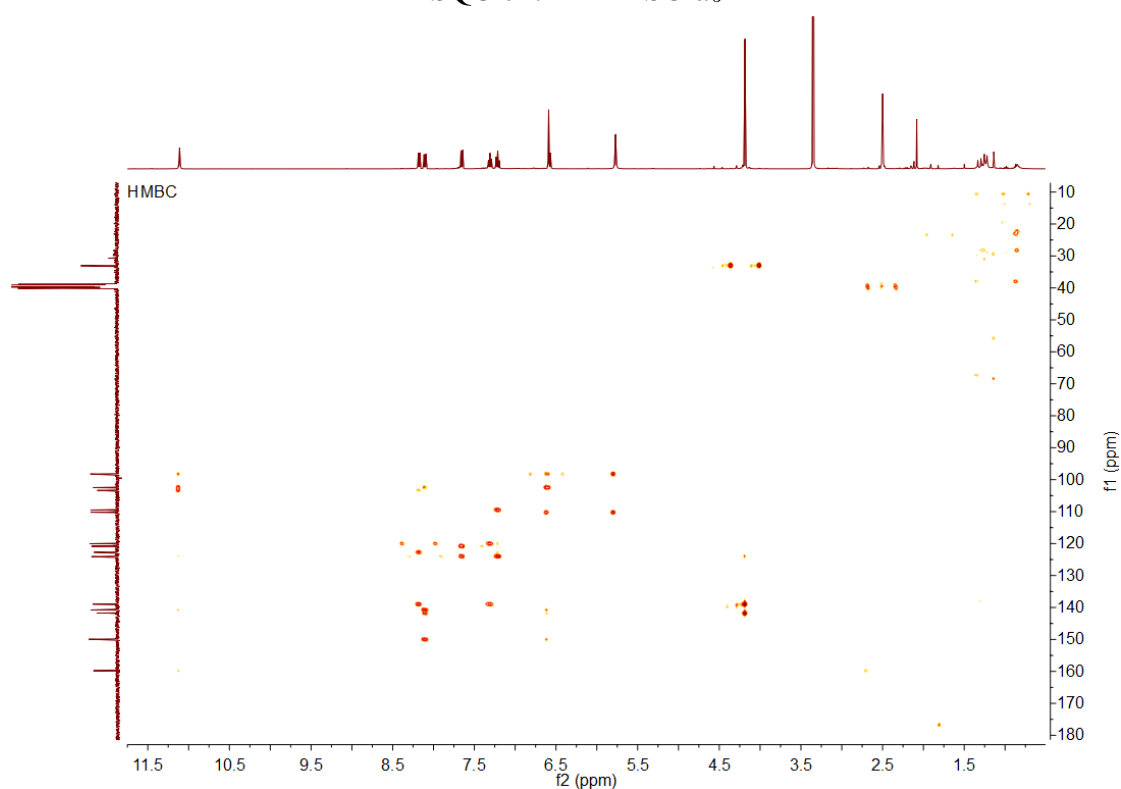

HMBC of **9** in DMSO- $d_6$

(c) To the mixture of **3q** (38 mg, 0.10 mmol), DMAP (2.4 mg, 20 mol%), TEA (21  $\mu$ L, 1.5 equiv) and anhydrous DCM (0.5 mL), Ac<sub>2</sub>O (12  $\mu$ L, 1.2 equiv) was added and stirred at room temperature for 5 min. The mixture was washed with saturated aqueous ammonium chloride, dried over Na<sub>2</sub>SO<sub>4</sub> and concentrated in vacuo. The crude product

was purified by silica gel chromatography (PE/Acetone = 4/1) to give a colourless oil. **3-((2,4-dinitrophenyl)difluoromethyl)-1-methyl-2-oxoindolin-3-yl acetate (10)**: colourless oil; 41.6 mg, 99 % yield,  $^1\text{H NMR}$  (400 MHz,  $\text{CDCl}_3$ )  $\delta$  (ppm) 8.48-8.44 (m, 2H), 7.94 (d,  $J = 8.4$  Hz, 1H), 7.45 (td,  $J = 8.0, 1.2$  Hz, 1H), 7.38 (d,  $J = 7.2$  Hz, 1H), 7.12 (td,  $J = 7.6, 0.4$  Hz, 1H), 6.93 (d,  $J = 8.0$  Hz, 1H), 3.26 (s, 3H), 2.10 (s, 3H);  $^{13}\text{C NMR}$  (101 MHz,  $\text{CDCl}_3$ )  $\delta$  (ppm) 168.6 (d,  $J = 6.3$  Hz, 1C), 167.4, 149.8, 149.1, 145.2, 132.3 (dd,  $J = 8.9, 6.8$  Hz, 1C), 131.7, 129.6 (t,  $J = 27.3$  Hz, 1C), 125.3 (t,  $J = 2.9$  Hz, 1C), 124.6, 123.2, 121.0, 119.4, 117.5 (dd,  $J = 260.1, 249.6$  Hz, 1C), 108.9, 80.5 (dd,  $J = 38.9, 25.4$  Hz, 1C), 26.8, 20.3.  $^{19}\text{F NMR}$  (376 MHz,  $\text{CDCl}_3$ )  $\delta$  (ppm) -98.5 (d,  $J = 273.4$  Hz, 1F), -103.2 (d,  $J = 273.0$  Hz, 1F). **HRMS (ESI)** Calcd for  $[\text{M} + \text{Na}]^+$   $\text{C}_{18}\text{H}_{13}\text{F}_2\text{N}_3\text{O}_7\text{Na}$ ,  $m/z$ : 444.0612, found: 444.0614.

(d) To the solution of **3q** (38 mg, 0.10 mmol) in 0.5 mL anhydrous DMF, DBU (30  $\mu\text{L}$ , 2.0 equiv) was added, the reaction performed at room temperature for 5 min. Then the mixture was washed with saturated aqueous ammonium chloride, dried over  $\text{Na}_2\text{SO}_4$  and concentrated in vacuo. The crude product was purified by silica gel chromatography (PE/Acetone = 4/1) to give a pale yellow solid. **3,3-difluoro-1'-methyl-6-nitro-3H-spiro[benzofuran-2,3'-indolin]-2'-one (11)**: pale yellow solid; 24.1 mg, 73 % yield,  $^1\text{H NMR}$  (400 MHz,  $\text{CDCl}_3$ )  $\delta$  (ppm) 8.03 (d,  $J = 6.4$  Hz, 1H), 7.89 (s, 1H), 7.73 (d,  $J = 6.0$  Hz, 1H), 7.51 (s, 1H), 7.42 (d,  $J = 3.6$  Hz, 1H), 7.18 (s, 1H), 6.95 (d,  $J = 6.0$  Hz, 1H), 3.23 (s, 3H);  $^{13}\text{C NMR}$  (101 MHz,  $\text{CDCl}_3$ )  $\delta$  (ppm) 169.1 (dd,  $J = 7.9, 2.5$  Hz, 1C), 161.1 (dd,  $J = 8.3, 6.9$  Hz, 1C), 152.0 (d,  $J = 1.3$  Hz, 1C), 145.3, 132.5, 127.8 (d,  $J = 3.4$  Hz, 1C), 126.4 (t,  $J = 26.0$  Hz, 1C), 125.2, 123.5, 123.3 (t,  $J = 255.2$  Hz, 1C), 119.0 (d,  $J = 2.8$  Hz, 1C), 118.0, 109.2, 107.9, 98.7 (dd,  $J = 29.0, 26.0$  Hz, 1C), 26.6.  $^{19}\text{F NMR}$  (376 MHz,  $\text{CDCl}_3$ )  $\delta$  (ppm) -78.8 (d,  $J = 257.2$  Hz, 1F), -109.6 (d,  $J = 256.5$  Hz, 1F). **HRMS (ESI)** Calcd for  $[\text{M} + \text{H}]^+$   $\text{C}_{16}\text{H}_{11}\text{F}_2\text{N}_2\text{O}_4$ ,  $m/z$ : 333.0686, found: 333.0681.

## Single crystal data

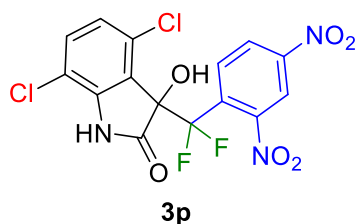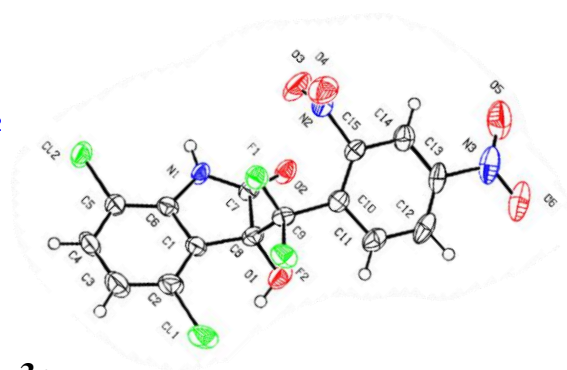

|                                         |                                                                                                                                                                              |
|-----------------------------------------|------------------------------------------------------------------------------------------------------------------------------------------------------------------------------|
| Identification code                     | <b>3p</b>                                                                                                                                                                    |
| Empirical formula                       | $C_{15}H_7Cl_2F_2N_3O_6$                                                                                                                                                     |
| Formula weight                          | 365.29                                                                                                                                                                       |
| Temperature                             | 100.0(2) K                                                                                                                                                                   |
| Crystal system                          | triclinic                                                                                                                                                                    |
| Space group                             | P-1                                                                                                                                                                          |
| Unit cell dimensions                    | $a = 11.4977(9) \text{ \AA}$ $\alpha = 70.511(6)^\circ$<br>$b = 11.8470(8) \text{ \AA}$ $\beta = 80.465(6)^\circ$<br>$c = 12.9471(9) \text{ \AA}$ $\gamma = 79.851(6)^\circ$ |
| Volume                                  | $1625.6(2) \text{ \AA}^3$                                                                                                                                                    |
| Z                                       | 4                                                                                                                                                                            |
| Density (calculated)                    | $1.774 \text{ g/cm}^3$                                                                                                                                                       |
| Absorption coefficient                  | $4.225 \text{ mm}^{-1}$                                                                                                                                                      |
| F (000)                                 | 872.0                                                                                                                                                                        |
| Crystal size                            | $0.13 \times 0.11 \times 0.09 \text{ mm}^3$                                                                                                                                  |
| Radiation                               | Cu K $\alpha$ ( $\lambda = 1.54184$ )                                                                                                                                        |
| Theta range for data collection         | 7.292 to $147.446^\circ$                                                                                                                                                     |
| Index ranges                            | $-10 \leq h \leq 13, -13 \leq k \leq 14, -14 \leq l \leq 15$                                                                                                                 |
| Reflections collected                   | 11200                                                                                                                                                                        |
| Independent reflections                 | 6351 [ $R_{\text{int}} = 0.0735, R_{\text{sigma}} = 0.0893$ ]                                                                                                                |
| Completeness to theta = 73.723          | 96.6%                                                                                                                                                                        |
| Absorption correction                   | Multi-scan                                                                                                                                                                   |
| Data/restraints/parameters              | 6351/0/517                                                                                                                                                                   |
| Goodness-of-fit on $F^2$                | 1.033                                                                                                                                                                        |
| Final R indexes [ $I \geq 2\sigma(I)$ ] | $R_1 = 0.0770, wR_2 = 0.1972$                                                                                                                                                |
| Final R indexes [all data]              | $R_1 = 0.1023, wR_2 = 0.2357$                                                                                                                                                |
| Largest diff. peak/hole                 | $0.68/-0.64 \text{ e \AA}^{-3}$                                                                                                                                              |



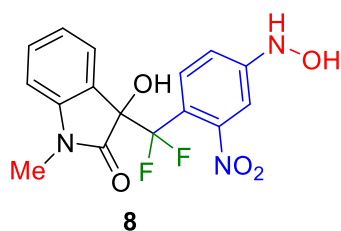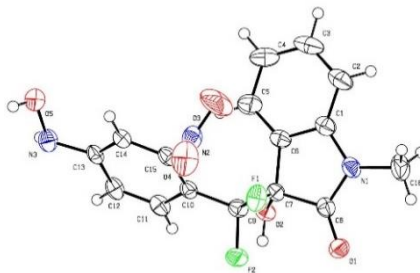

|                                         |                                                               |                            |
|-----------------------------------------|---------------------------------------------------------------|----------------------------|
| Identification code                     | <b>8</b>                                                      |                            |
| Empirical formula                       | $C_{16}H_{13}F_2N_3O_5$                                       |                            |
| Formula weight                          | 365.29                                                        |                            |
| Temperature                             | 150.00(10) K                                                  |                            |
| Crystal system                          | triclinic                                                     |                            |
| Space group                             | P-1                                                           |                            |
| Unit cell dimensions                    | $a = 7.8331(6) \text{ \AA}$                                   | $\alpha = 88.789(7)^\circ$ |
|                                         | $b = 9.3318(8) \text{ \AA}$                                   | $\beta = 75.495(7)^\circ$  |
|                                         | $c = 12.2430(11) \text{ \AA}$                                 | $\gamma = 66.796(8)^\circ$ |
|                                         | 88.789(7)                                                     |                            |
|                                         | 75.495(7)                                                     |                            |
|                                         | 66.796(8)                                                     |                            |
| Volume                                  | $793.29(13) \text{ \AA}^3$                                    |                            |
| Z                                       | 2                                                             |                            |
| Density (calculated)                    | $1.529 \text{ g/cm}^3$                                        |                            |
| Absorption coefficient                  | $0.130 \text{ mm}^{-1}$                                       |                            |
| F (000)                                 | 376.0                                                         |                            |
| Crystal size                            | $0.15 \times 0.13 \times 0.12 \text{ mm}^3$                   |                            |
| Radiation                               | Mo $K\alpha$ ( $\lambda = 0.71073$ )                          |                            |
| Theta range for data collection         | 4.768 to 49.99°                                               |                            |
| Index ranges                            | $-9 \leq h \leq 7, -10 \leq k \leq 11, -14 \leq l \leq 13$    |                            |
| Reflections collected                   | 5179                                                          |                            |
| Independent reflections                 | 2793 [ $R_{\text{int}} = 0.0206, R_{\text{sigma}} = 0.0388$ ] |                            |
| Completeness to theta = 24.995          | 100%                                                          |                            |
| Absorption correction                   | Multi-scan                                                    |                            |
| Data/restraints/parameters              | 2793/0/242                                                    |                            |
| Goodness-of-fit on $F^2$                | 1.022                                                         |                            |
| Final R indexes [ $I \geq 2\sigma(I)$ ] | $R_1 = 0.0420, wR_2 = 0.0940$                                 |                            |
| Final R indexes [all data]              | $R_1 = 0.0547, wR_2 = 0.1024$                                 |                            |
| Largest diff. peak/hole                 | 0.18/-0.19 $e \text{ \AA}^{-3}$                               |                            |

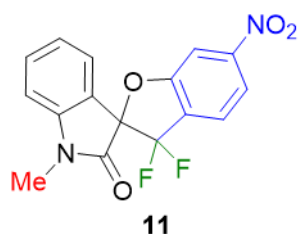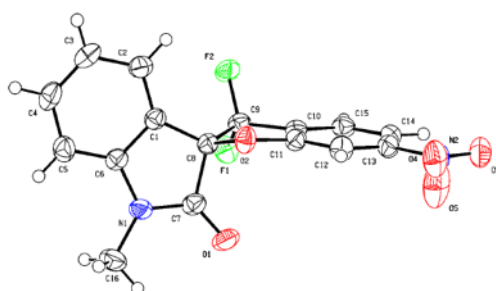

|                                         |                                                               |                             |
|-----------------------------------------|---------------------------------------------------------------|-----------------------------|
| Identification code                     | <b>11</b>                                                     |                             |
| Empirical formula                       | $C_{16}H_{10}F_2N_2O_4$                                       |                             |
| Formula weight                          | 332.26                                                        |                             |
| Temperature                             | 219.99(10) K                                                  |                             |
| Crystal system                          | triclinic                                                     |                             |
| Space group                             | P-1                                                           |                             |
| Unit cell dimensions                    | $a = 7.8185(5) \text{ \AA}$                                   | $\alpha = 92.612(6)^\circ$  |
|                                         | $b = 8.7925(7) \text{ \AA}$                                   | $\beta = 101.796(5)^\circ$  |
|                                         | $c = 11.6820(7) \text{ \AA}$                                  | $\gamma = 112.885(6)^\circ$ |
| Volume                                  | $717.23(3) \text{ \AA}^3$                                     |                             |
| Z                                       | 2                                                             |                             |
| Density (calculated)                    | $1.538 \text{ g/cm}^3$                                        |                             |
| Absorption coefficient                  | $0.129 \text{ mm}^{-1}$                                       |                             |
| F (000)                                 | 340.0                                                         |                             |
| Crystal size                            | $0.13 \times 0.12 \times 0.11 \text{ mm}^3$                   |                             |
| Radiation                               | Mo $K\alpha$ ( $\lambda = 0.71073$ )                          |                             |
| Theta range for data collection         | 5.078 to 49.978°                                              |                             |
| Index ranges                            | $-9 \leq h \leq 7, -6 \leq k \leq 10, -13 \leq l \leq 13$     |                             |
| Reflections collected                   | 4587                                                          |                             |
| Independent reflections                 | 2531 [ $R_{\text{int}} = 0.0213, R_{\text{sigma}} = 0.0391$ ] |                             |
| Completeness to theta = 24.986          | 100 %                                                         |                             |
| Absorption correction                   | Multi-scan                                                    |                             |
| Data/restraints/parameters              | 2531/0/228                                                    |                             |
| Goodness-of-fit on $F^2$                | 1.052                                                         |                             |
| Final R indexes [ $I \geq 2\sigma(I)$ ] | $R_1 = 0.0437, wR_2 = 0.1066$                                 |                             |
| Final R indexes [all data]              | $R_1 = 0.0554, wR_2 = 0.1170$                                 |                             |
| Largest diff. peak/hole                 | $0.23/-0.22 \text{ e \AA}^{-3}$                               |                             |

# NMR spectrum

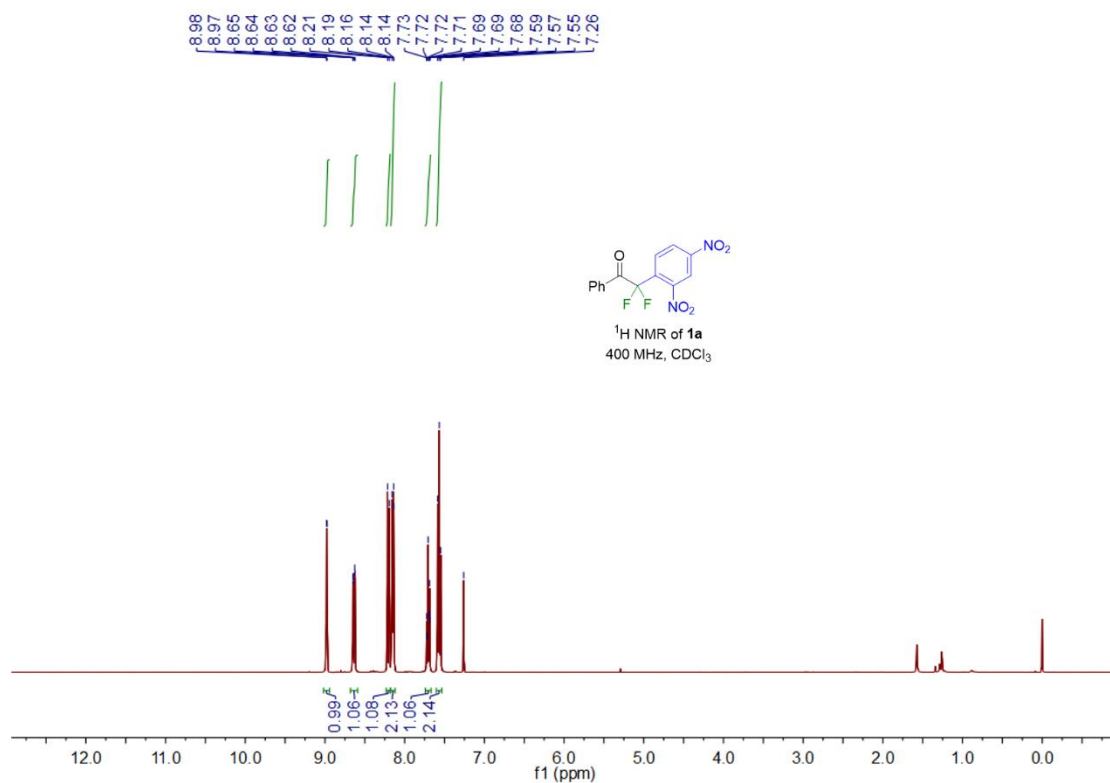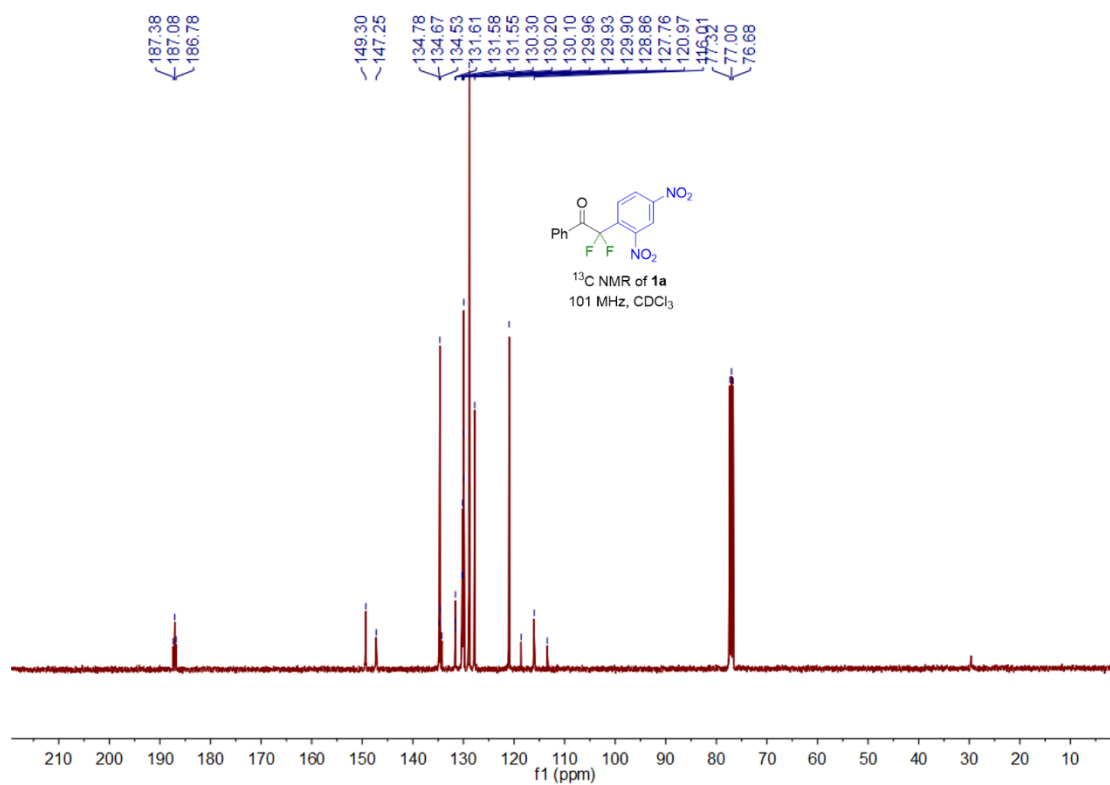

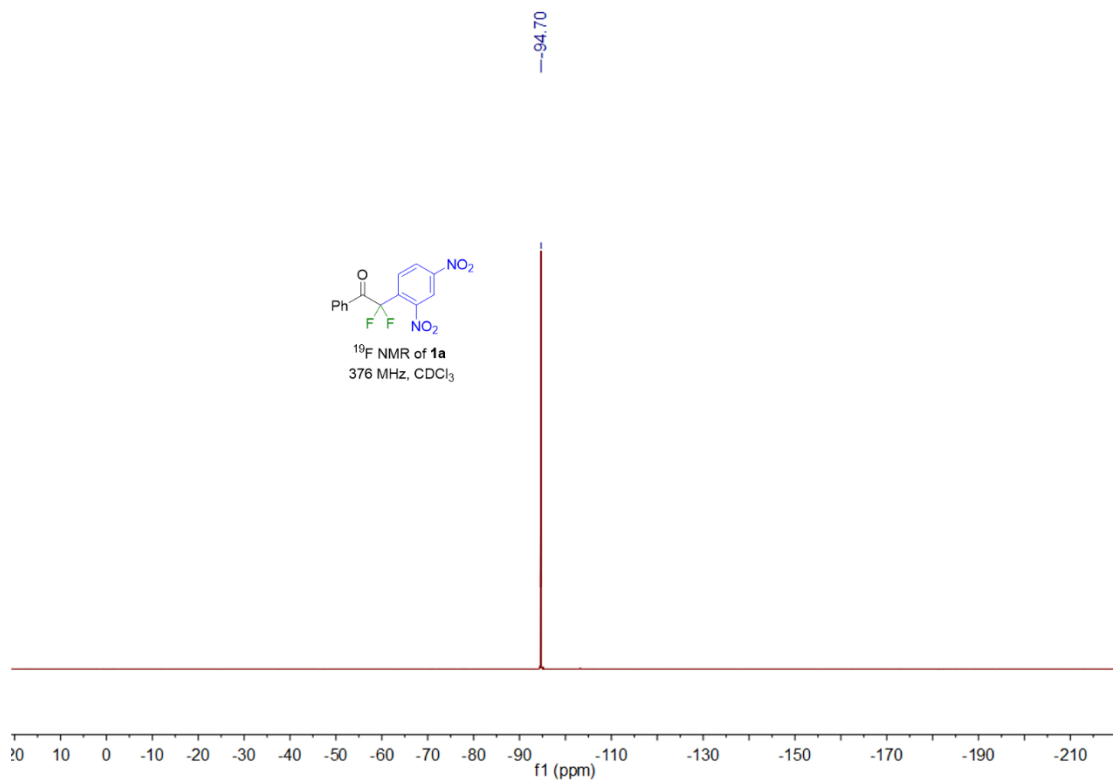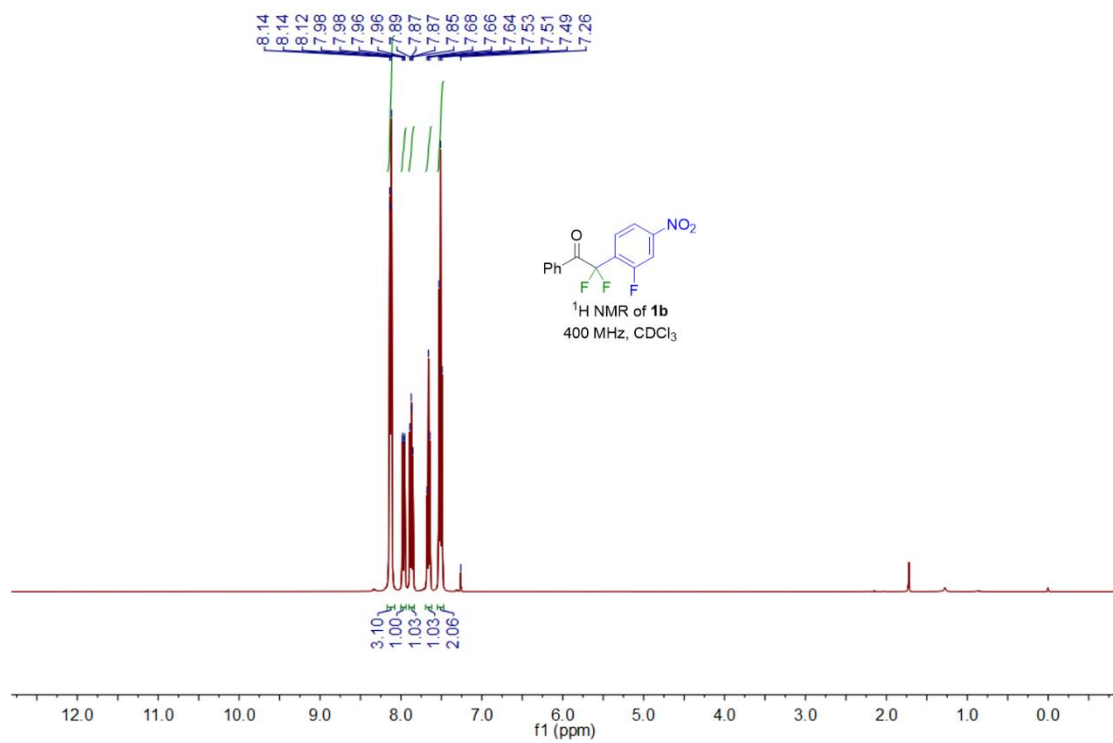

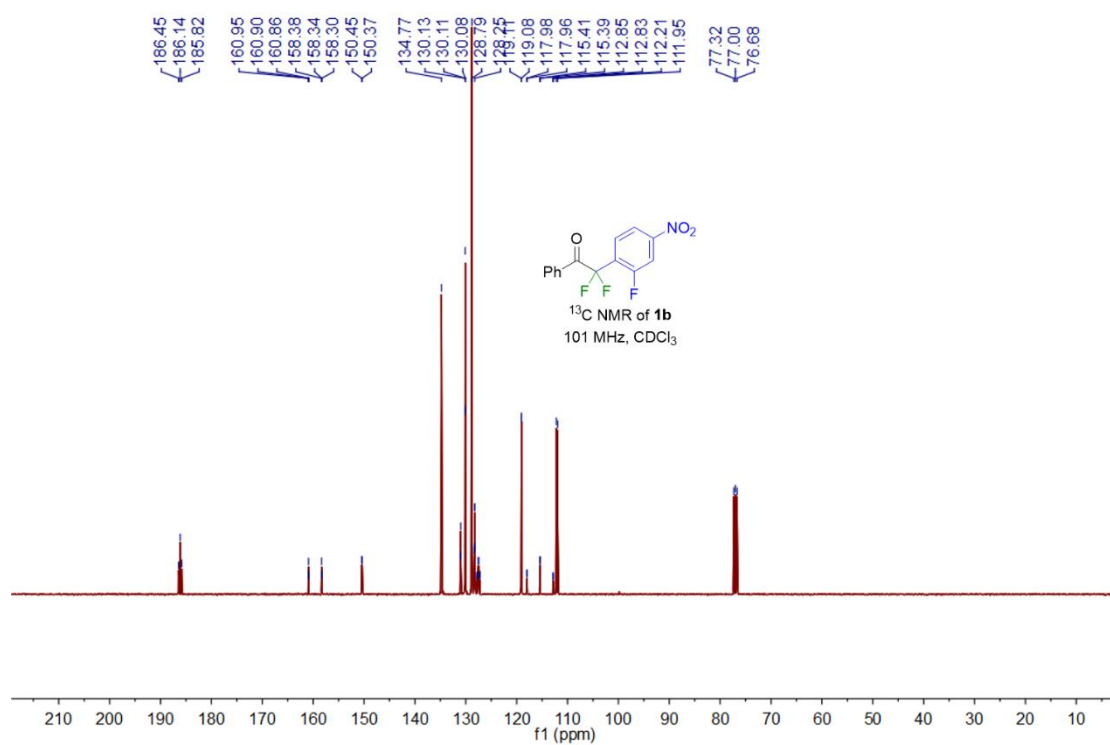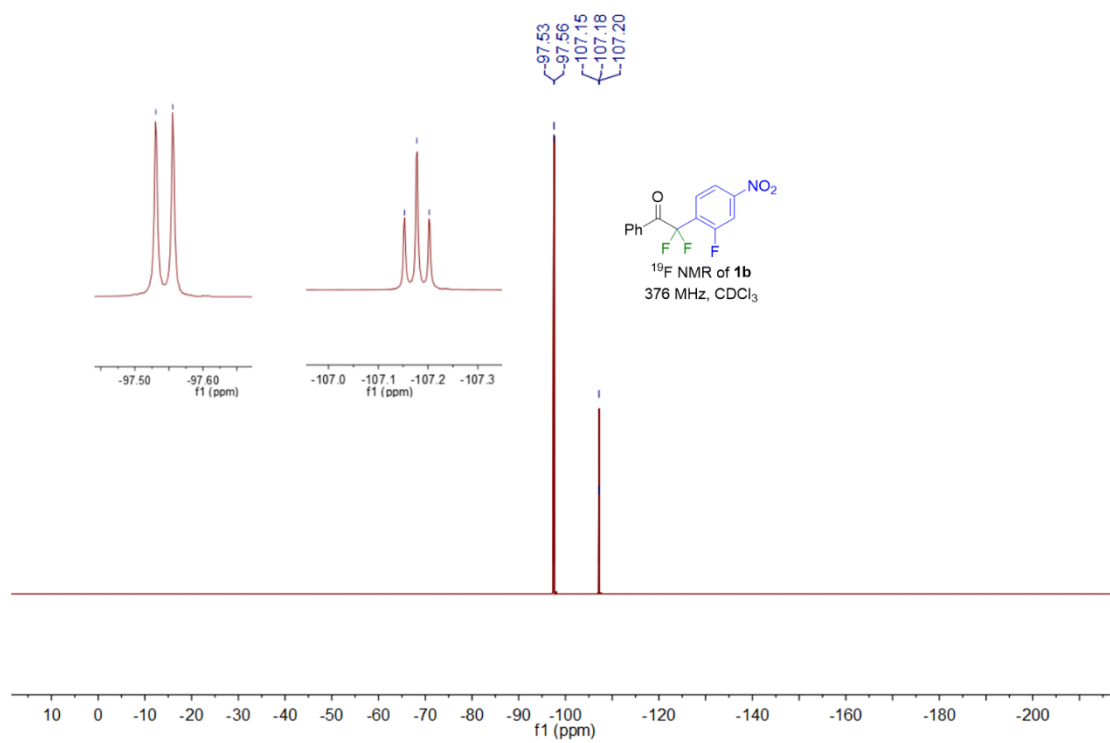

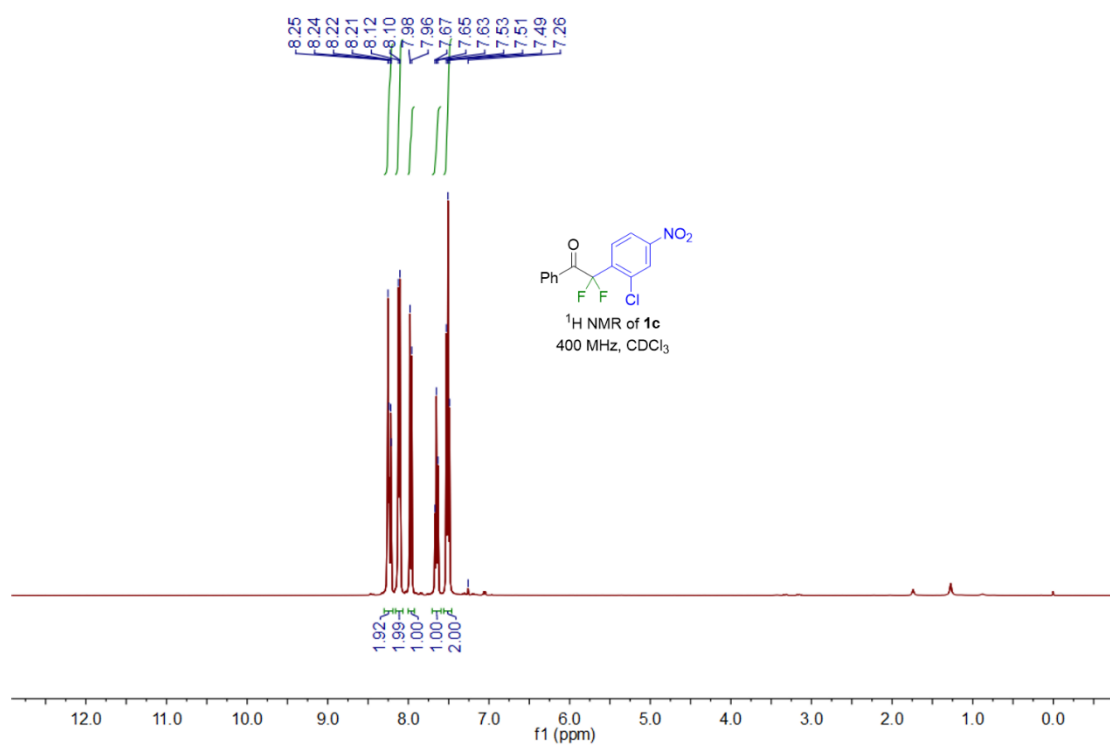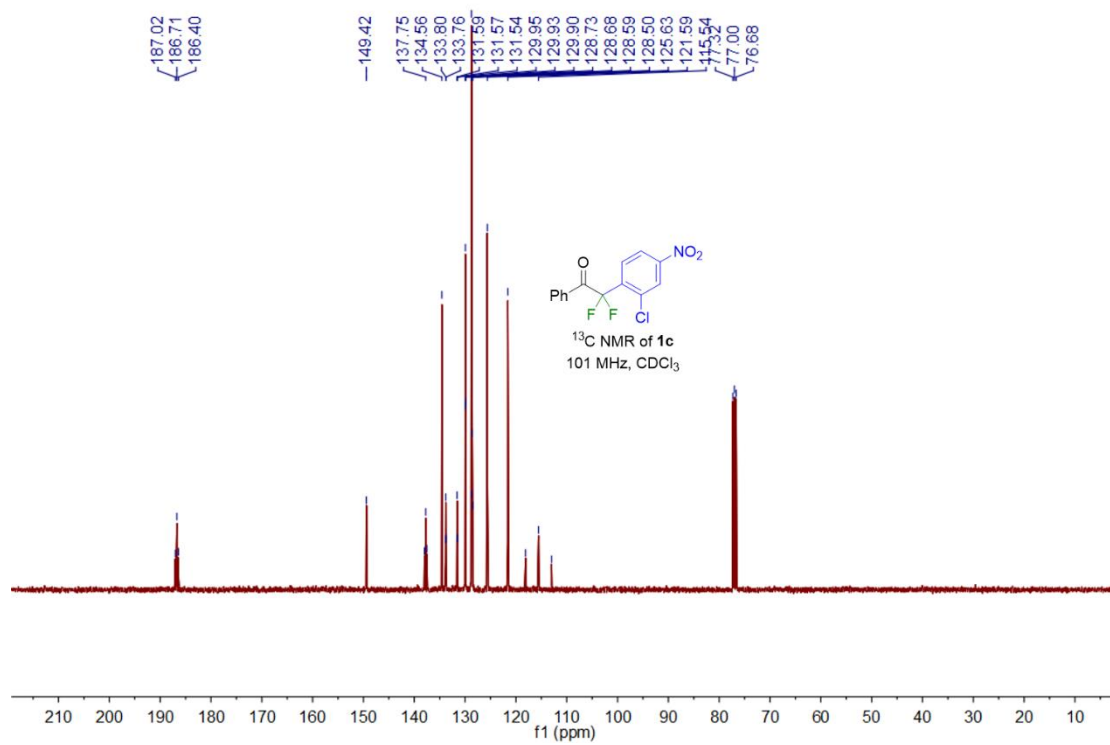

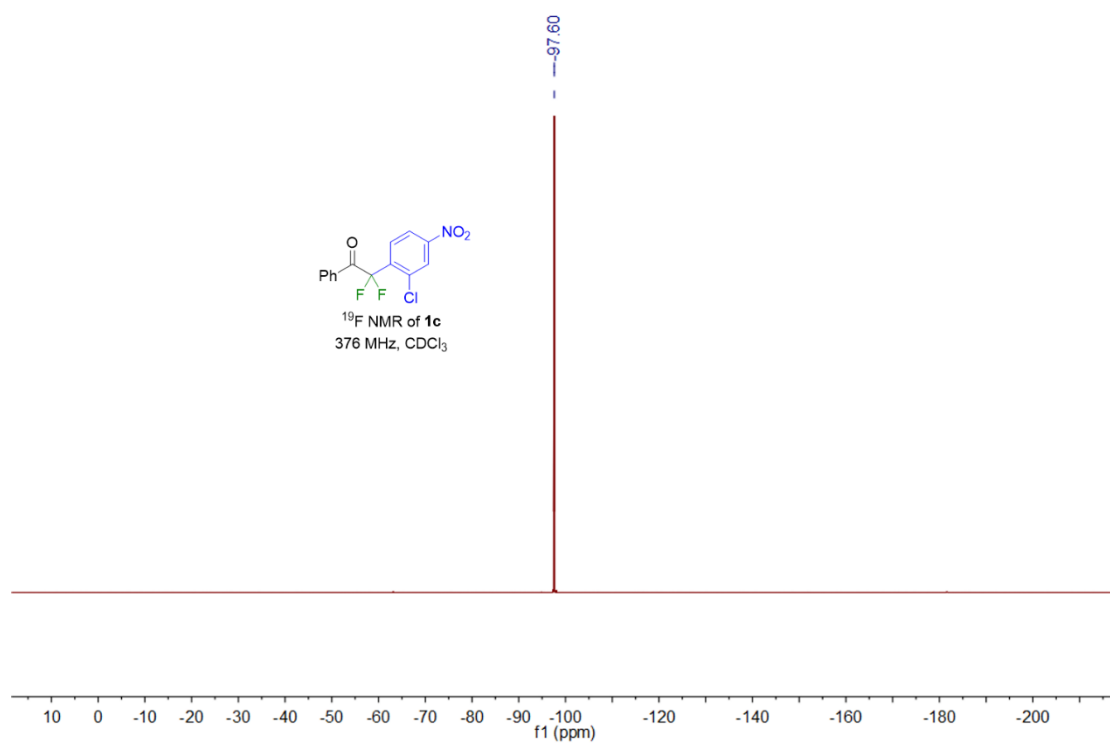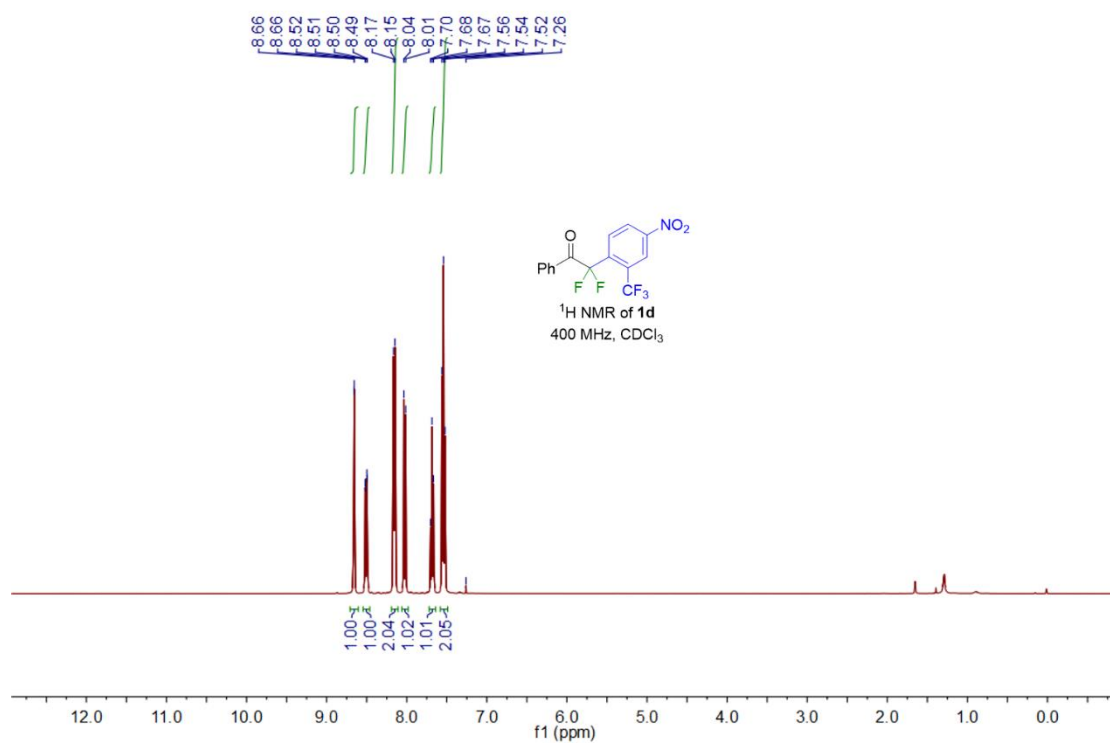

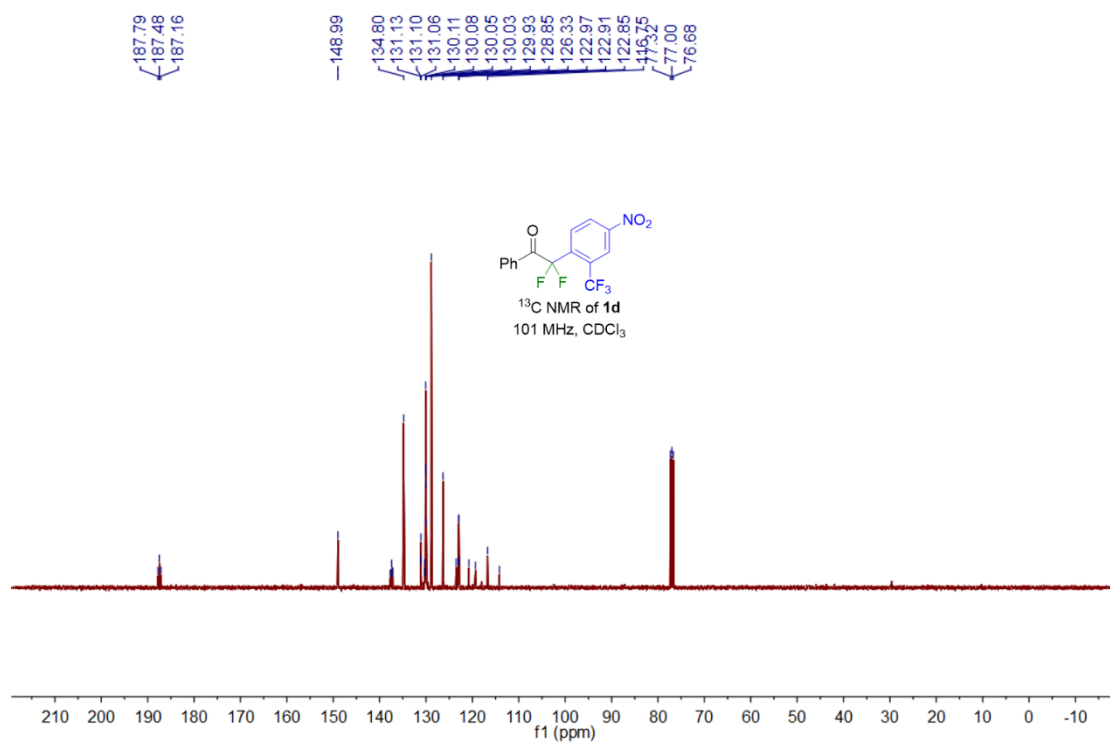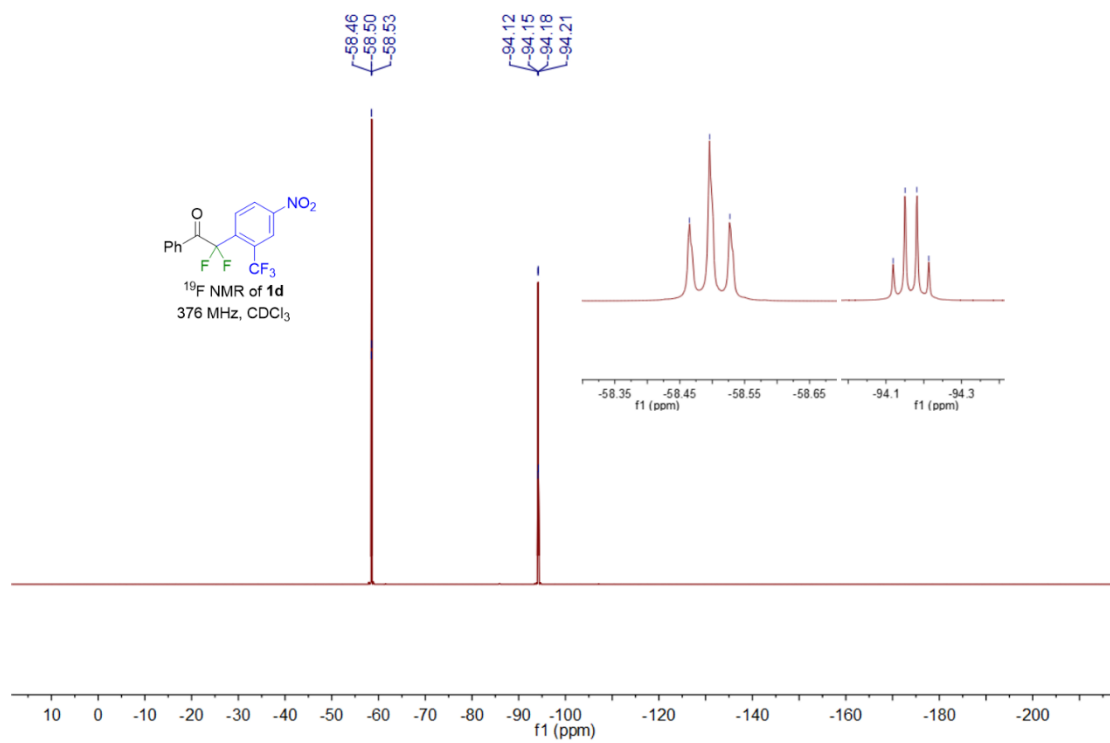



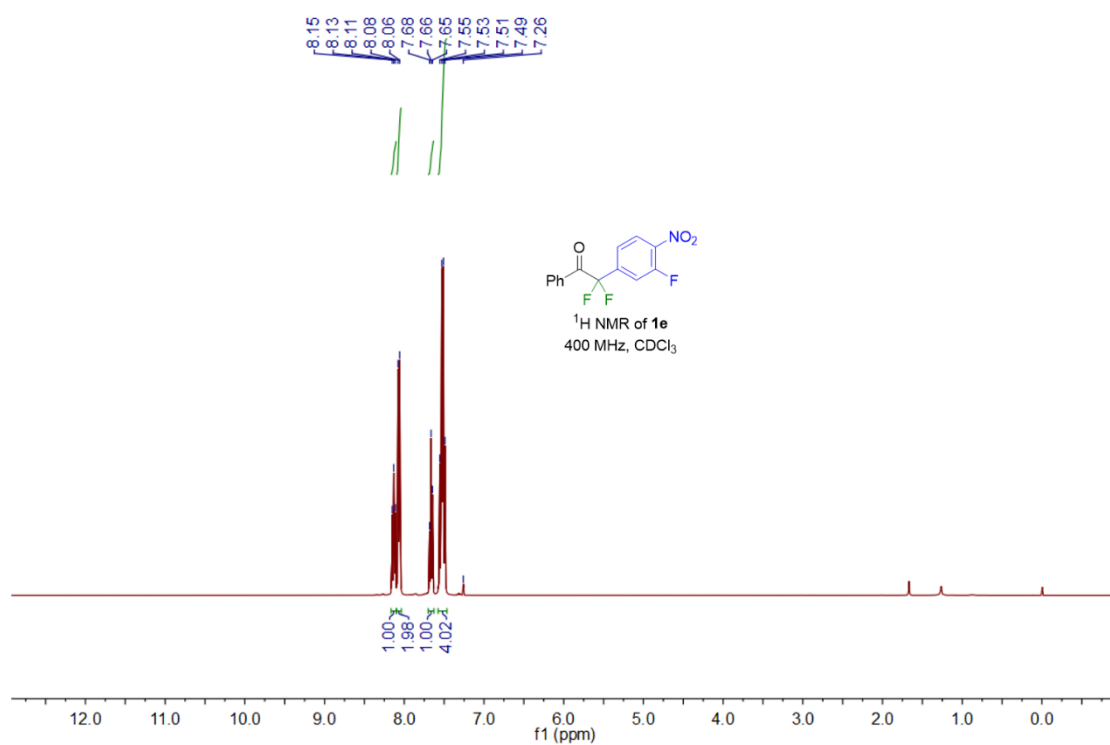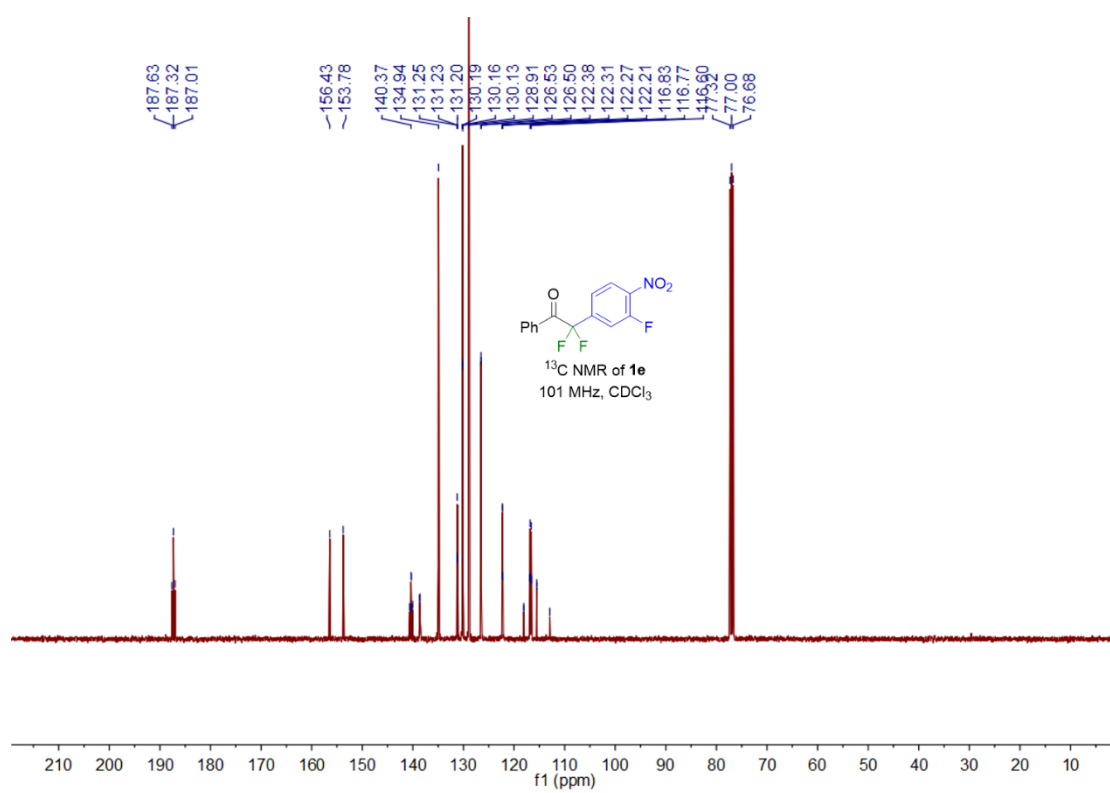

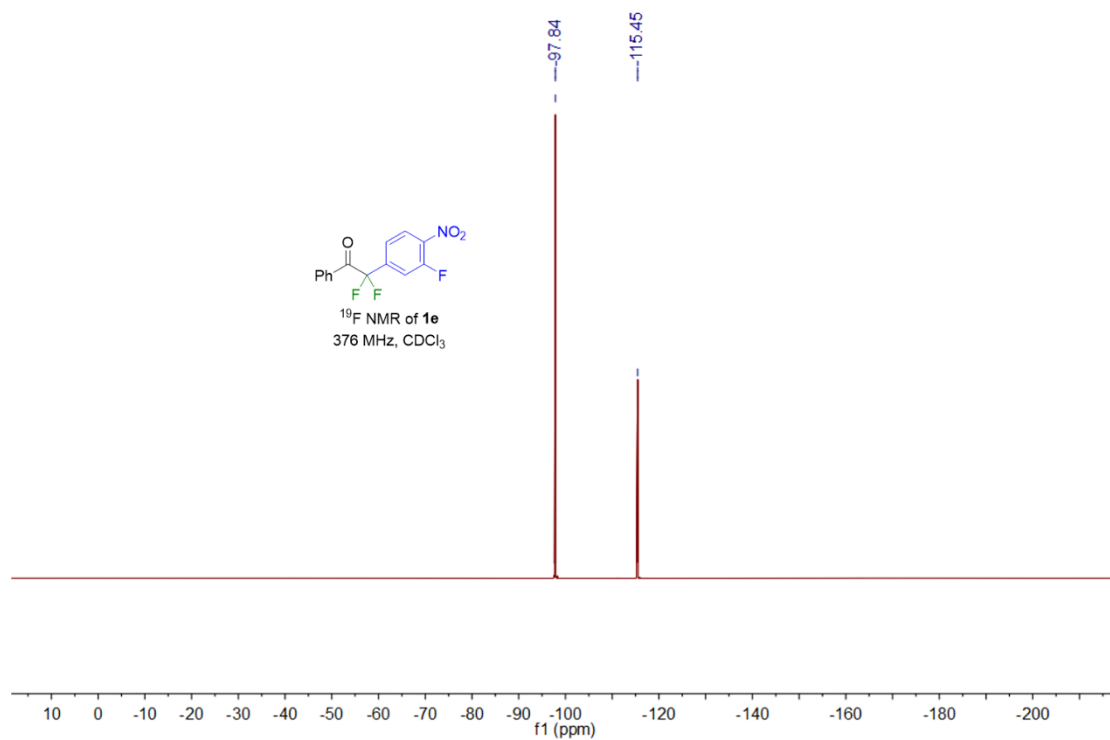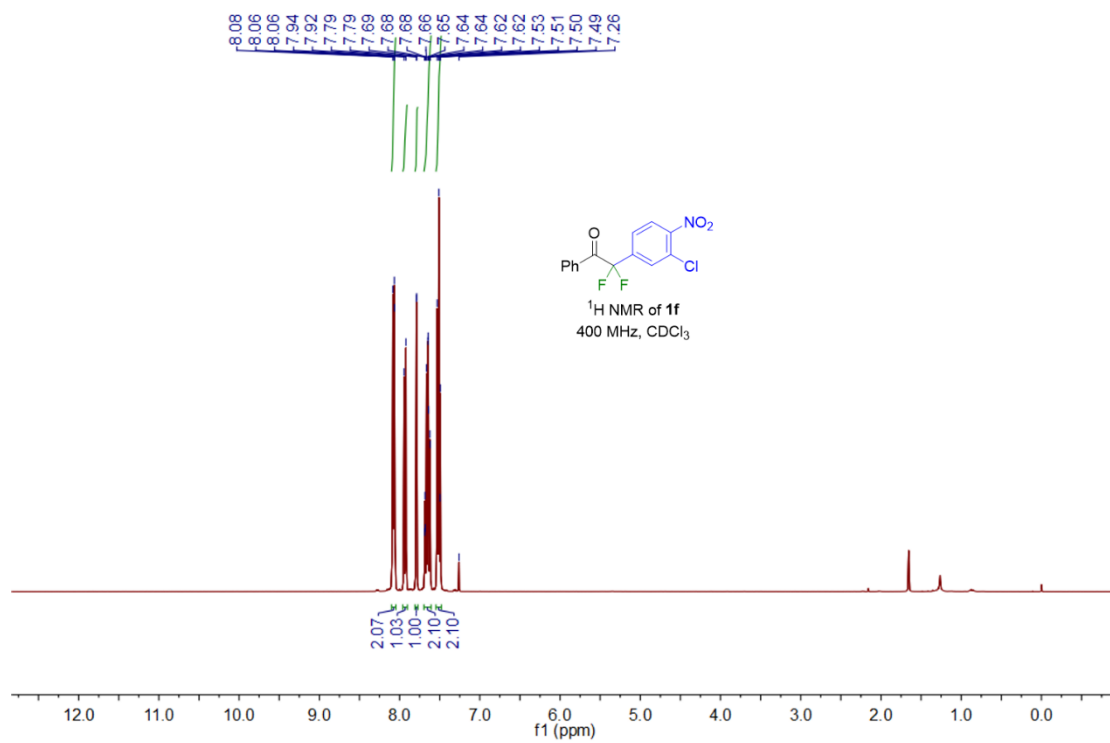

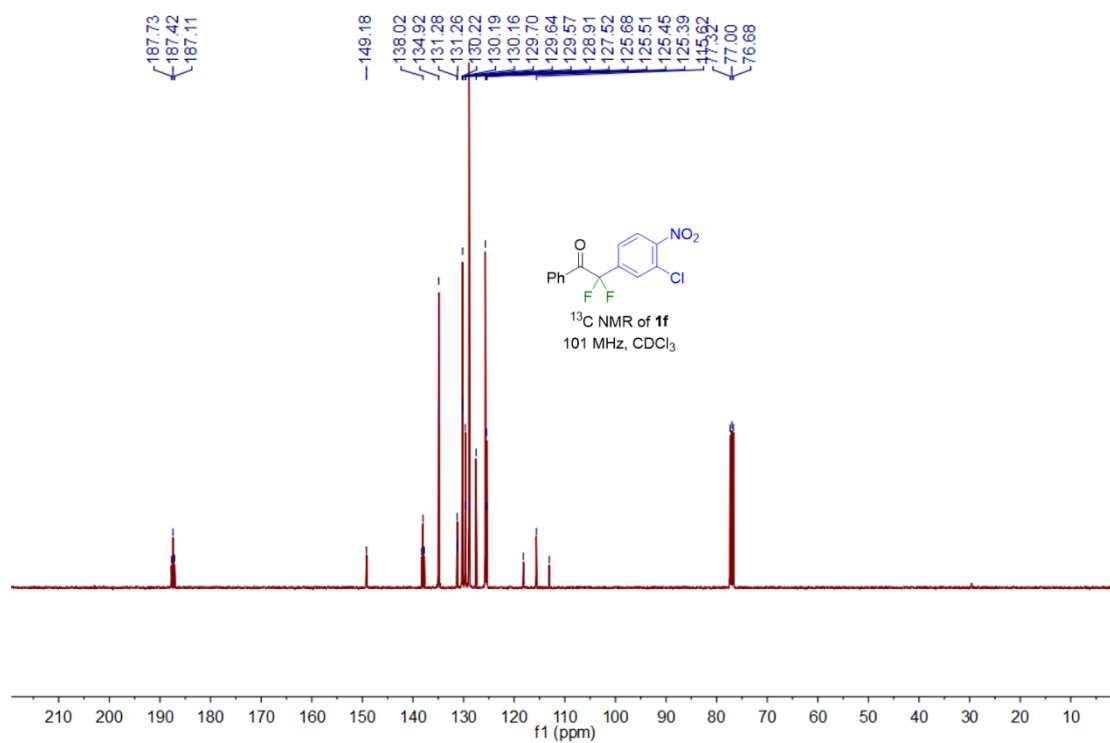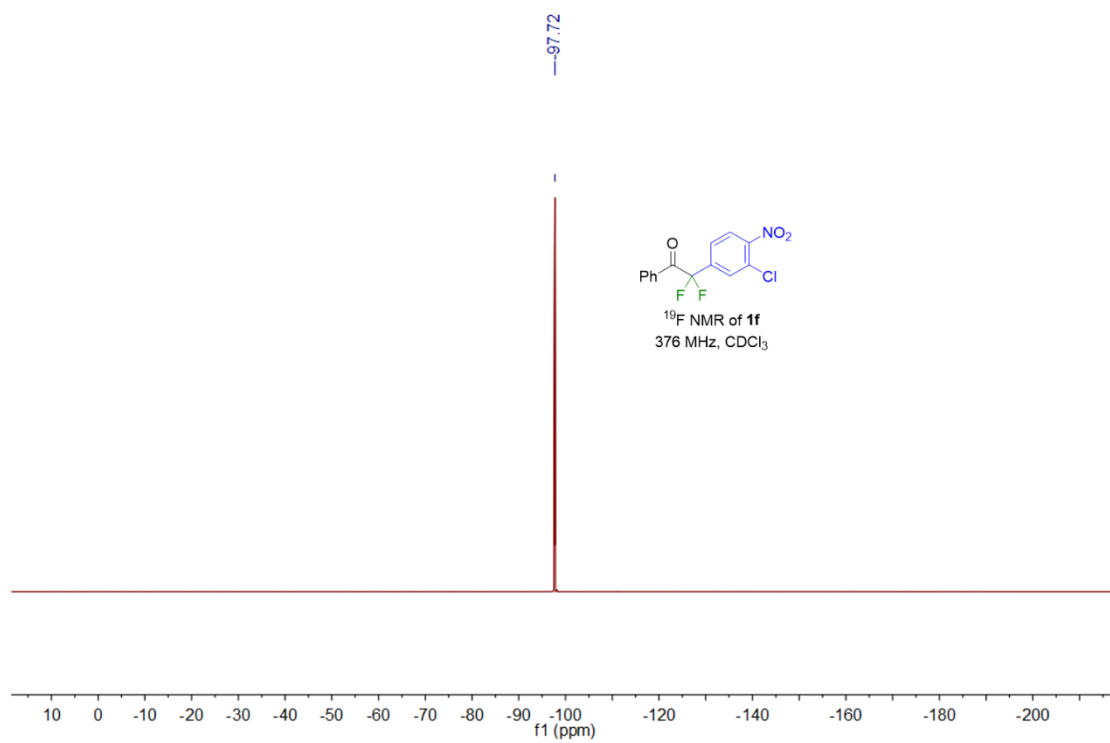

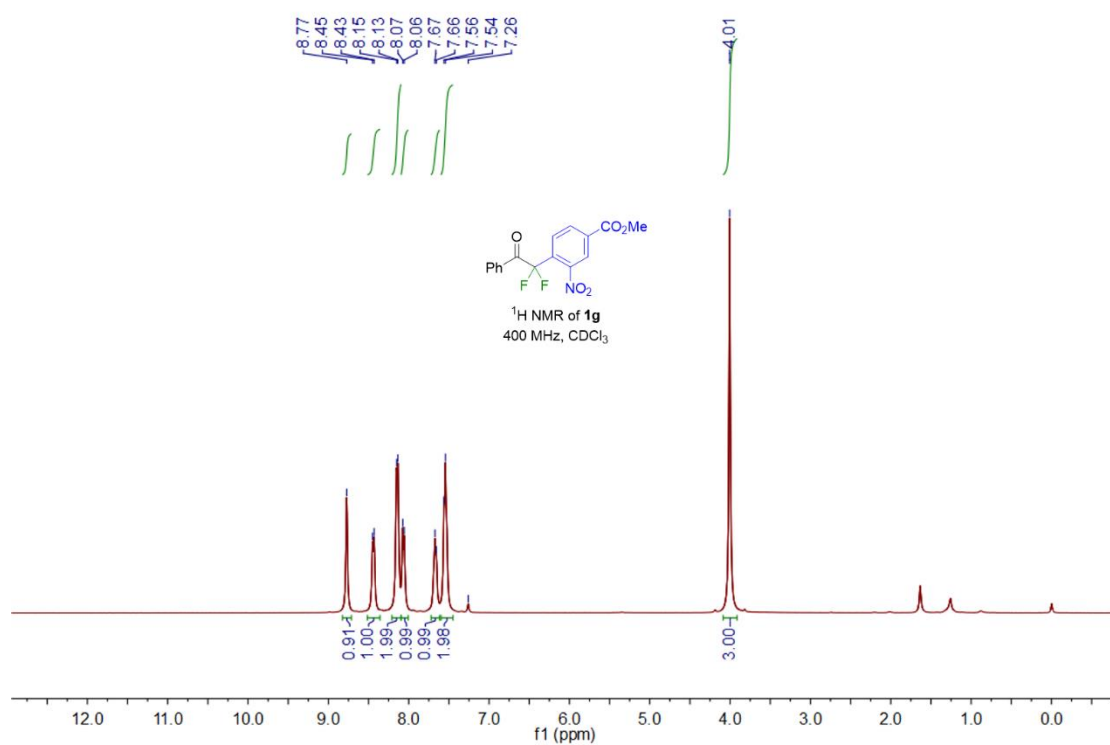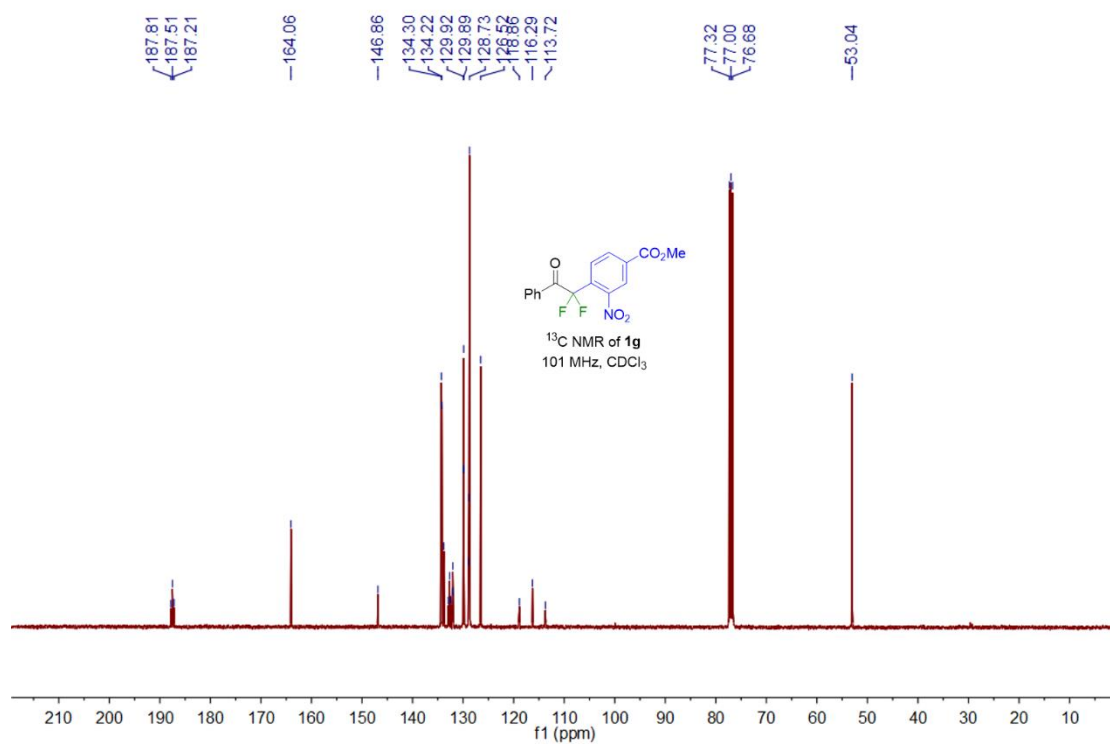

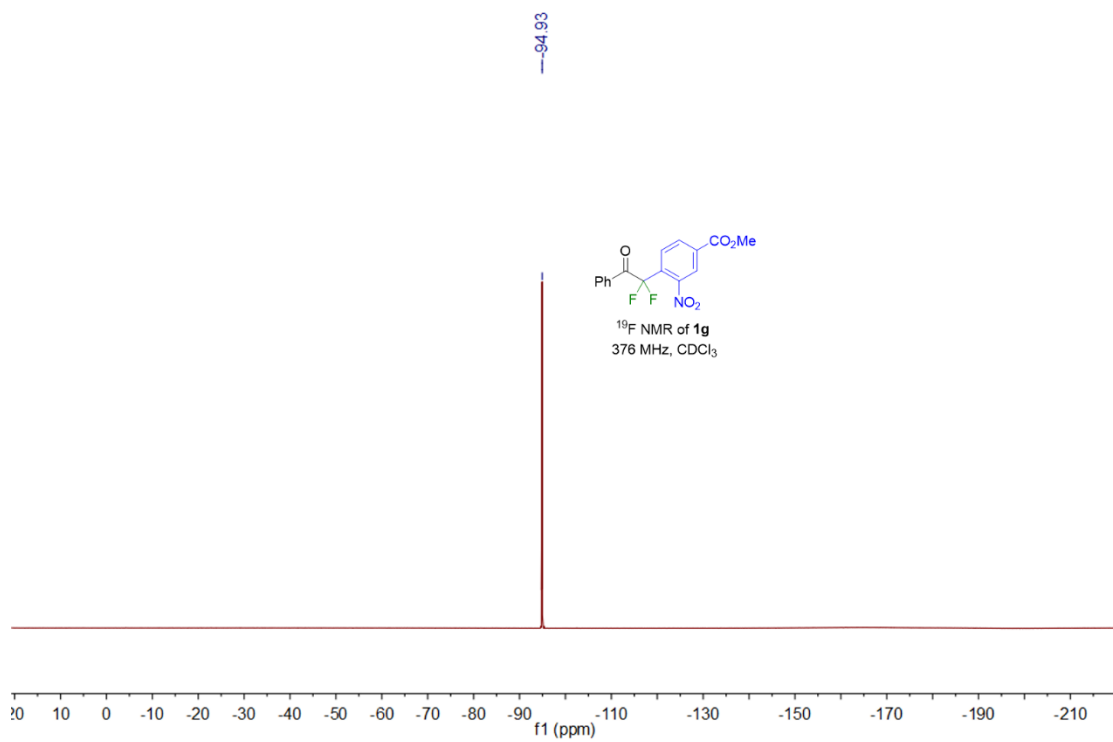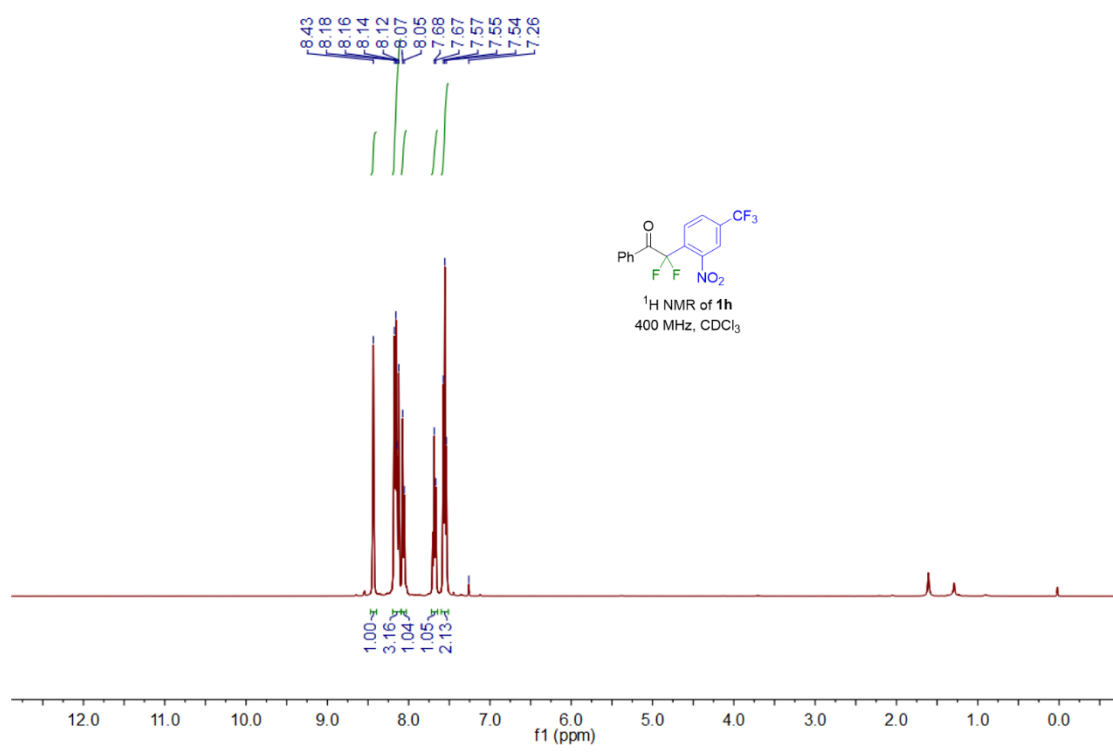

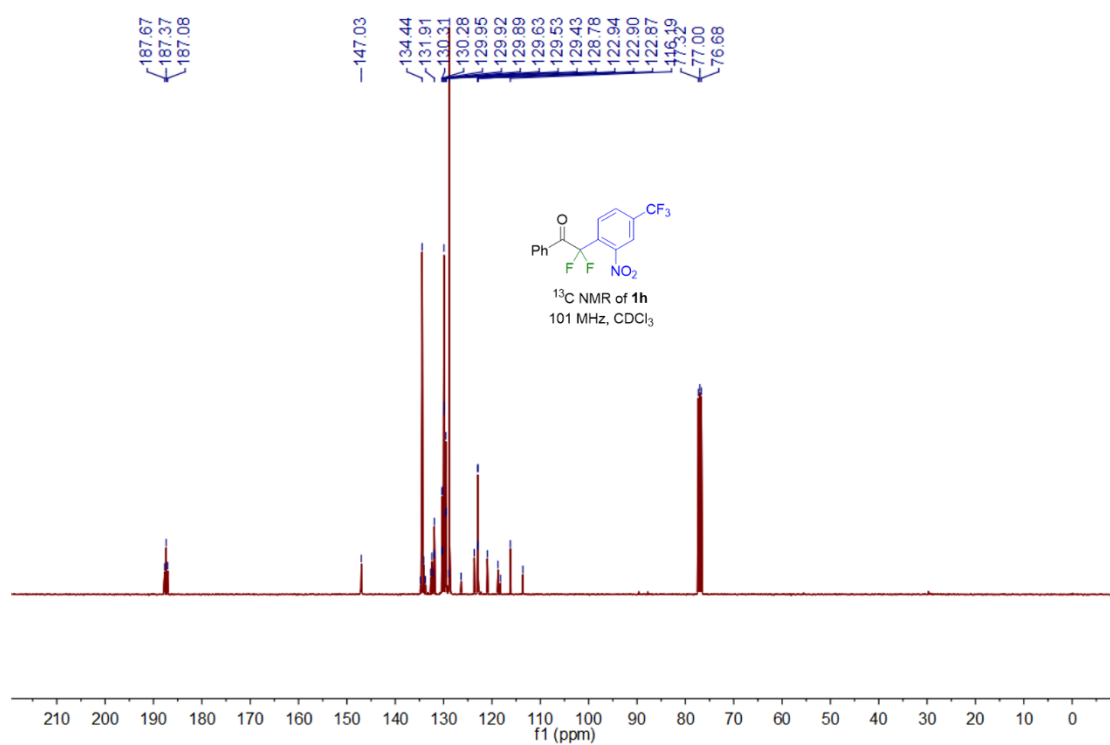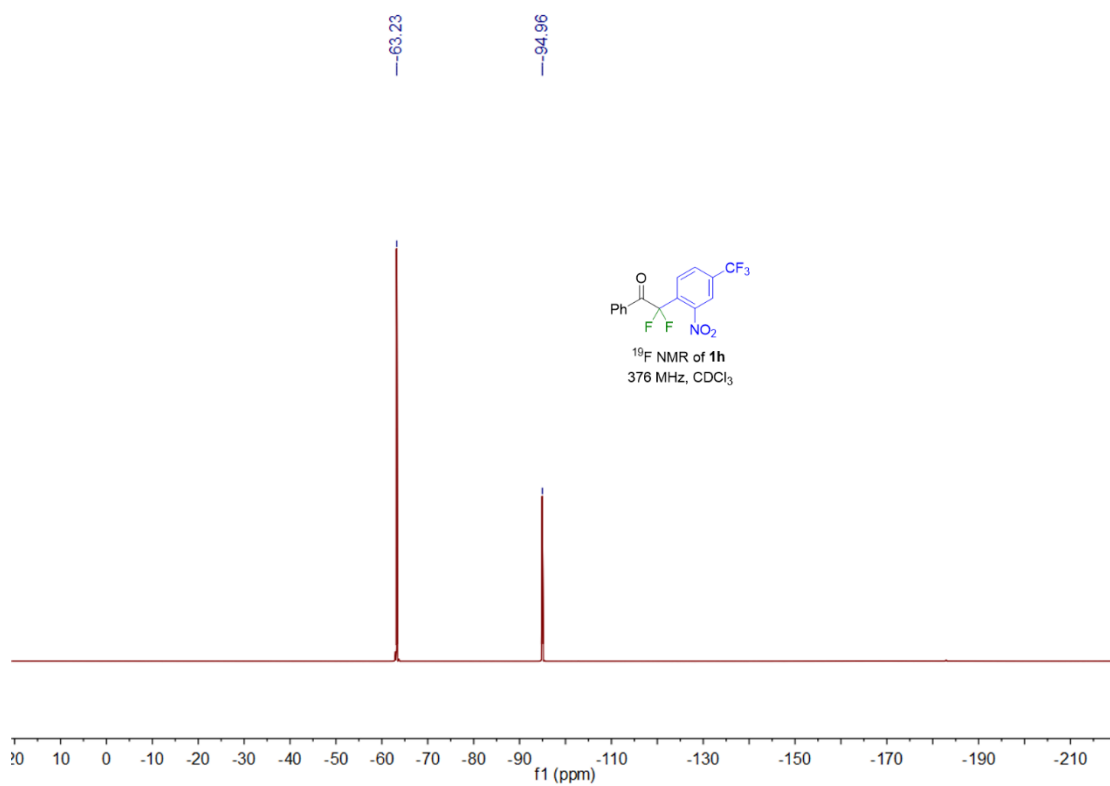

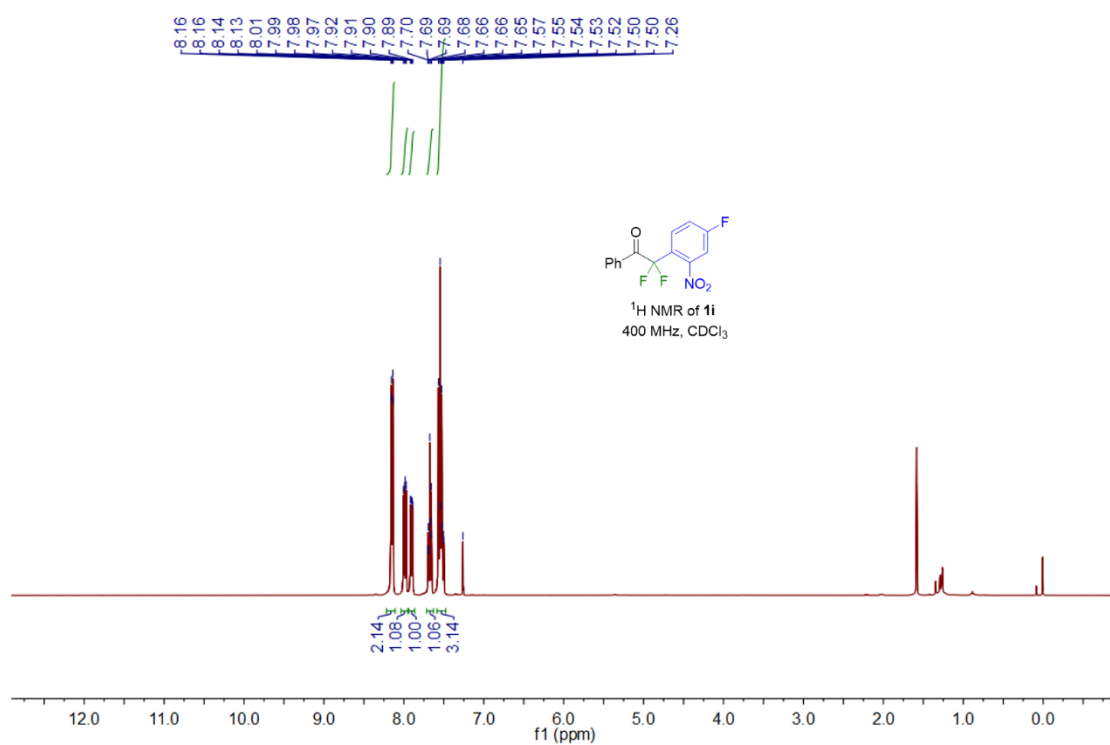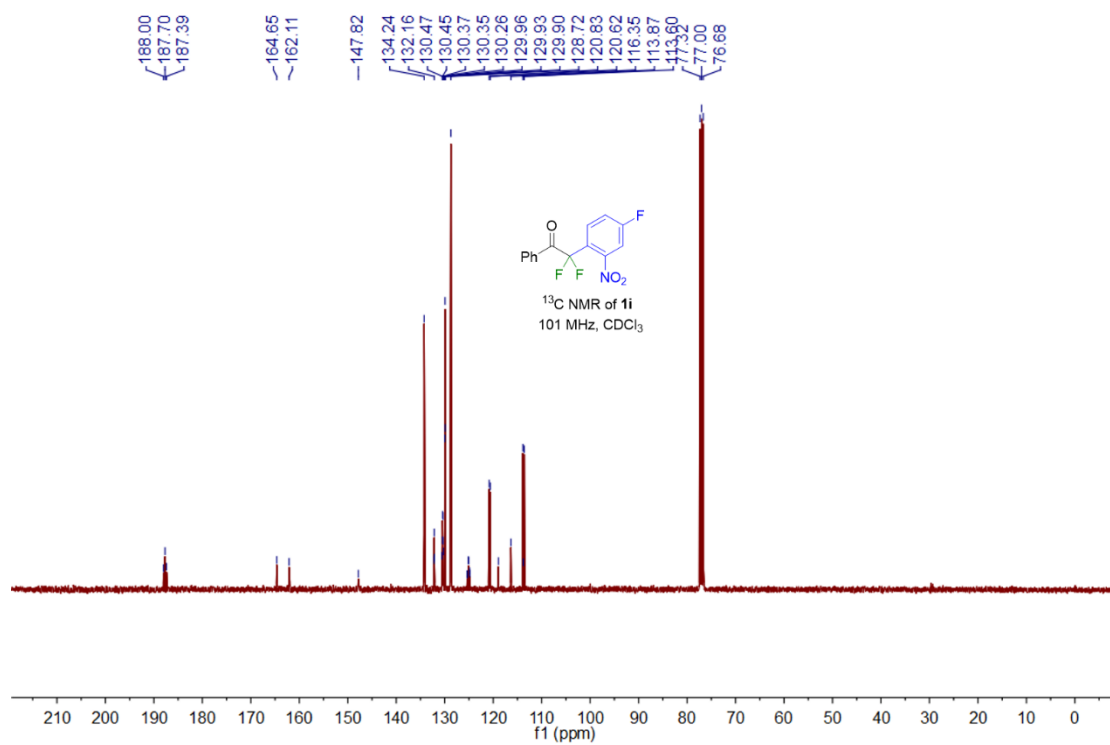

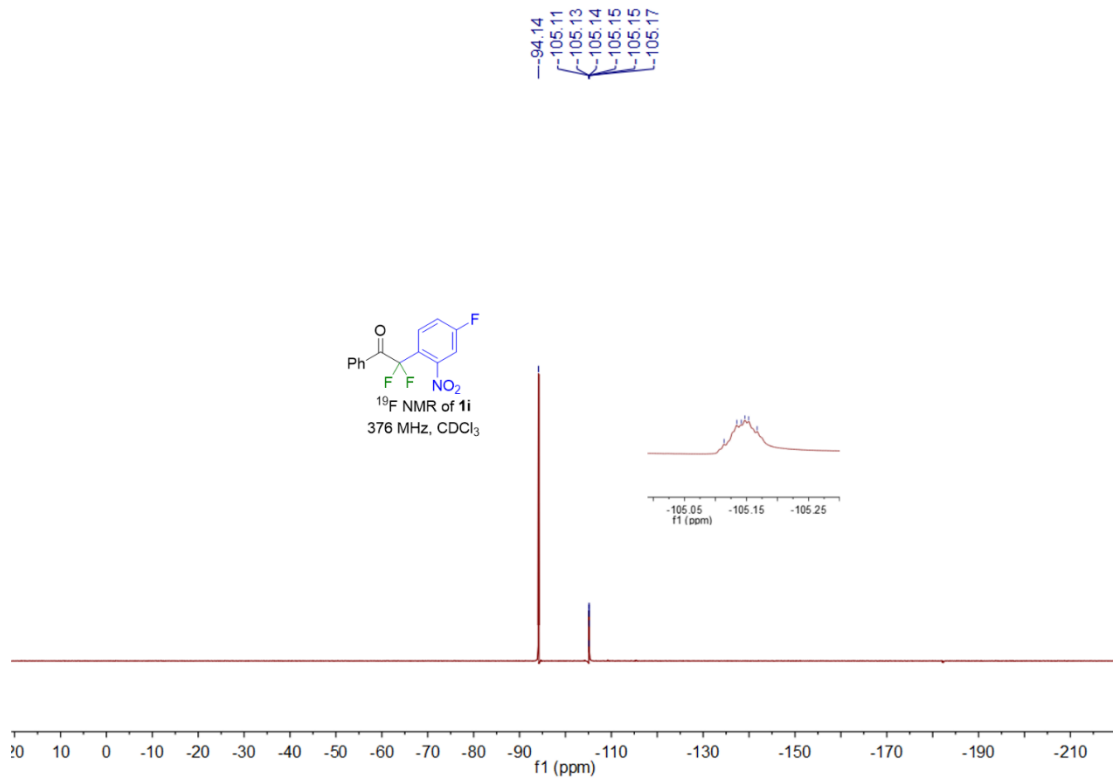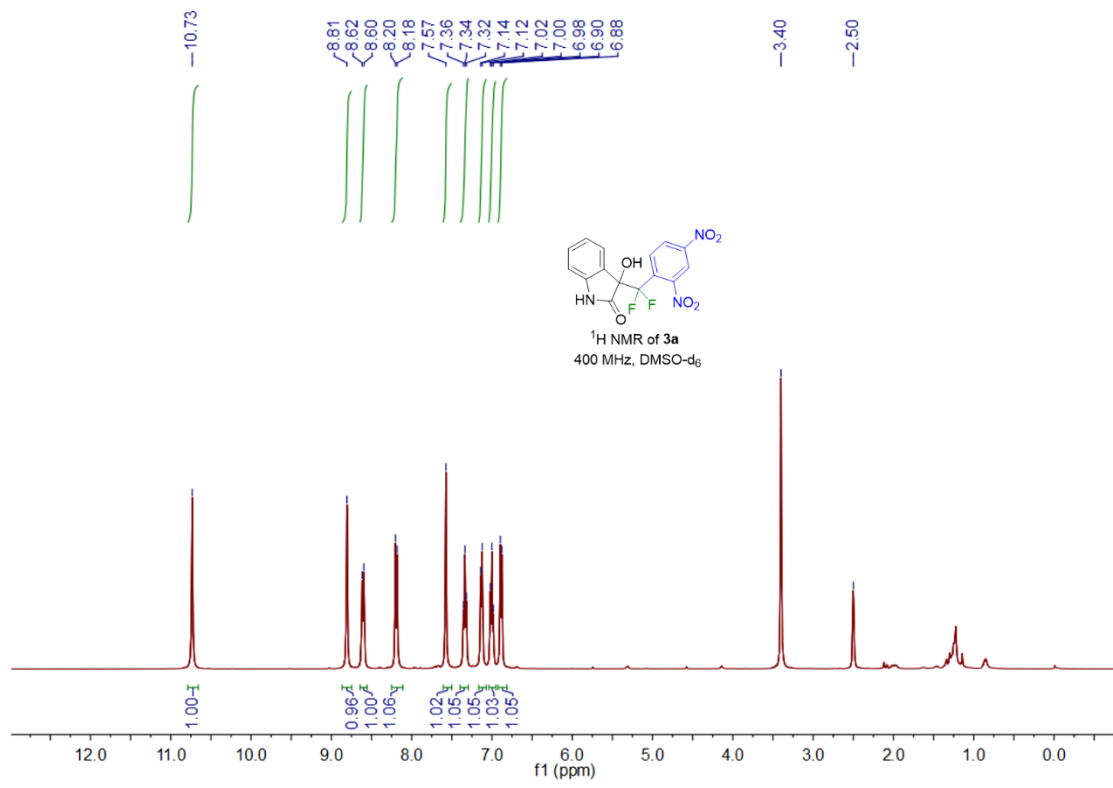



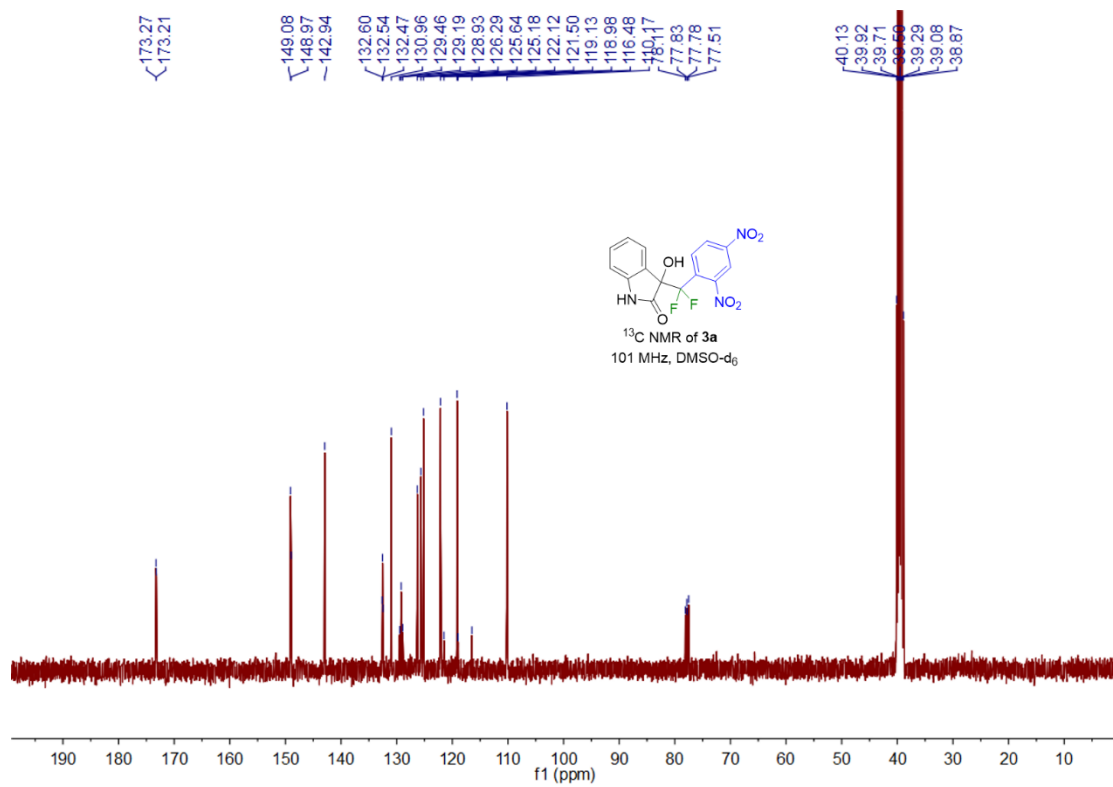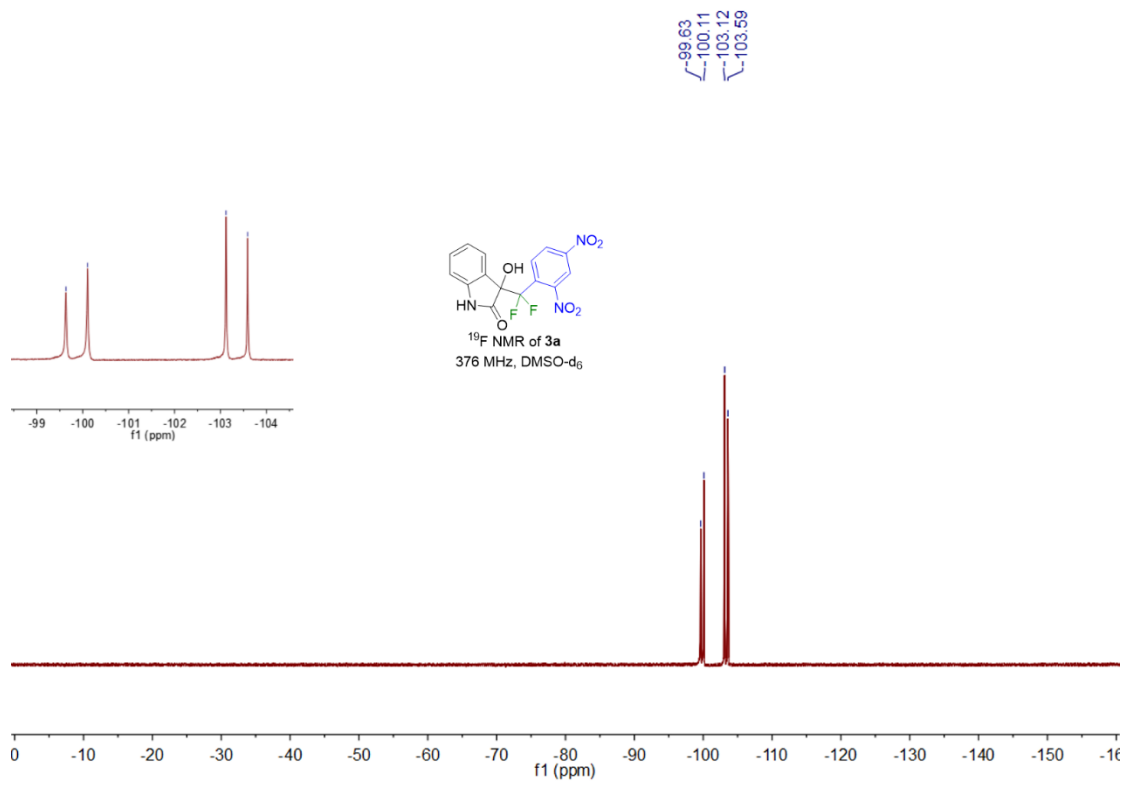



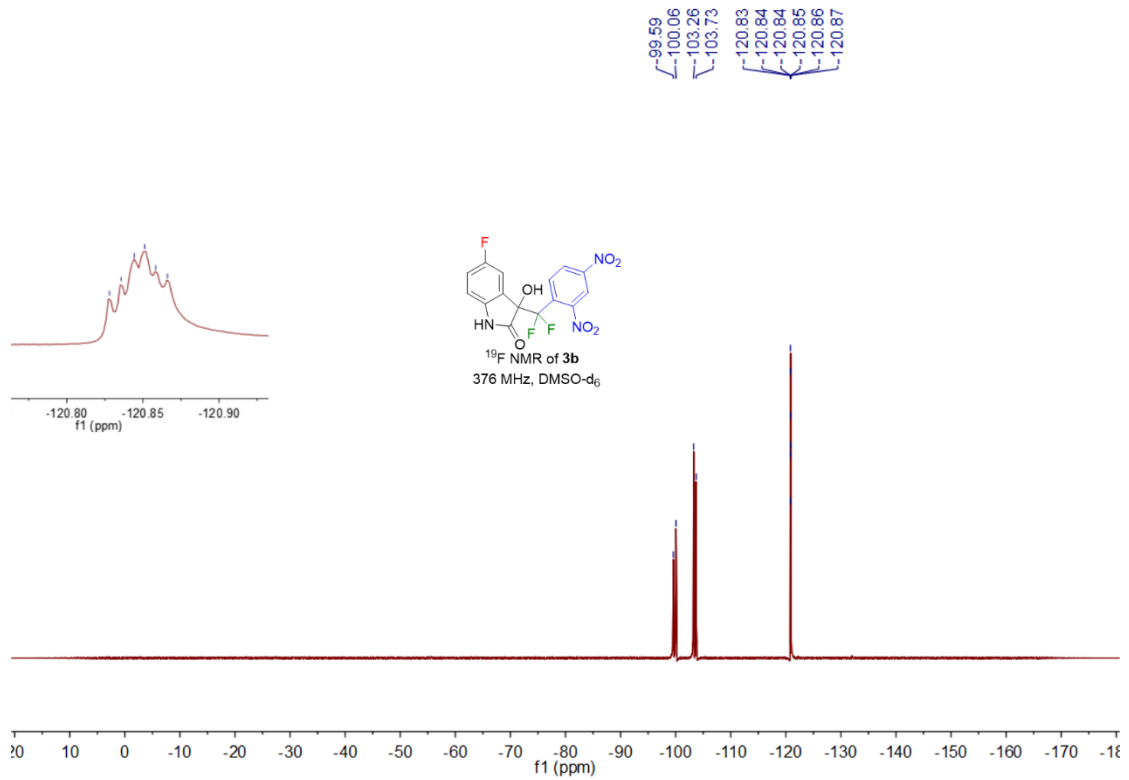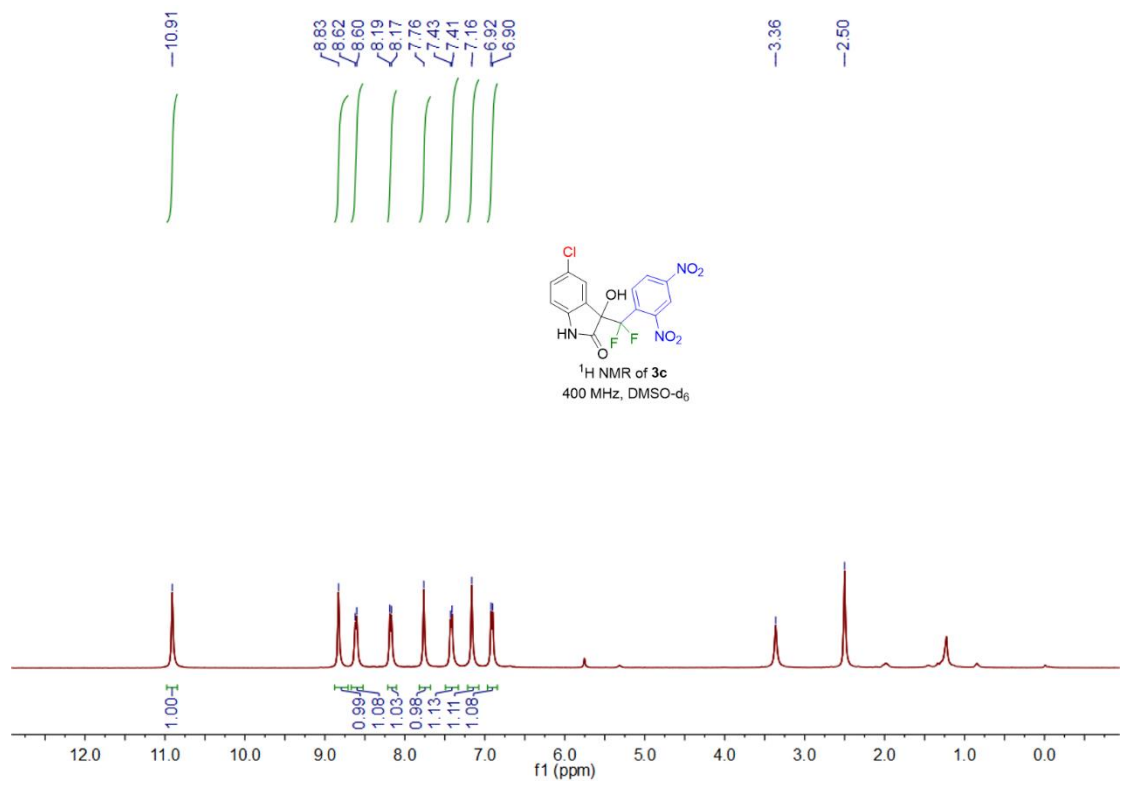

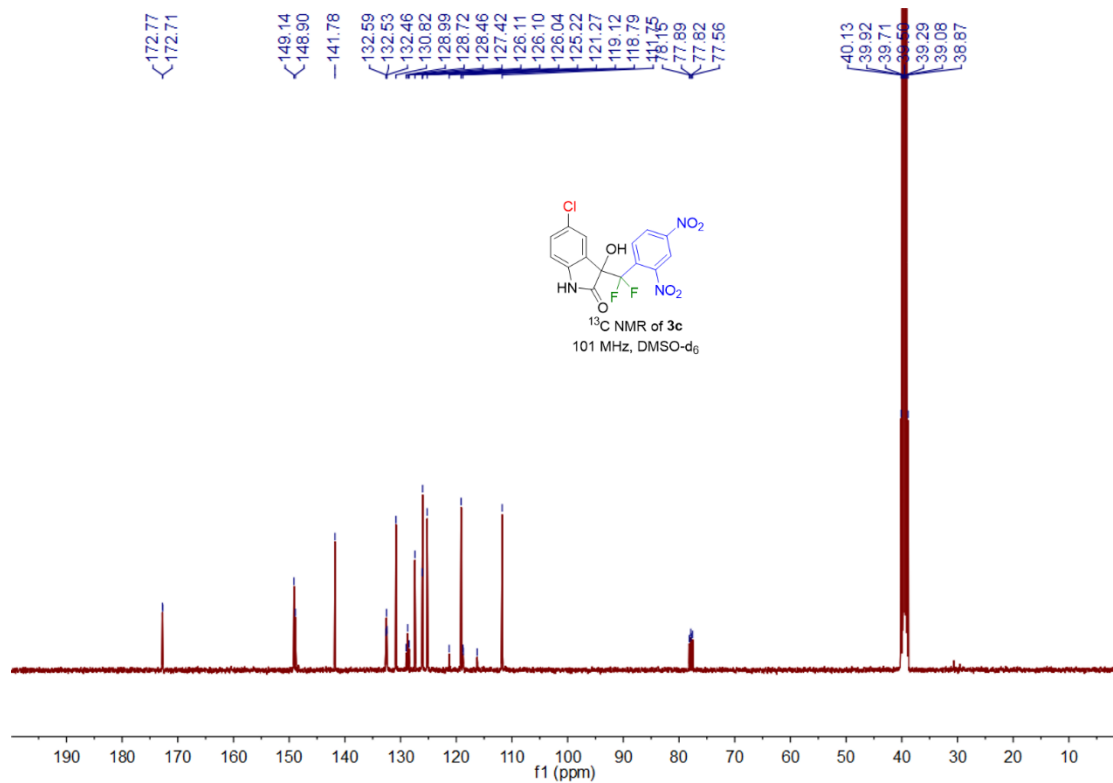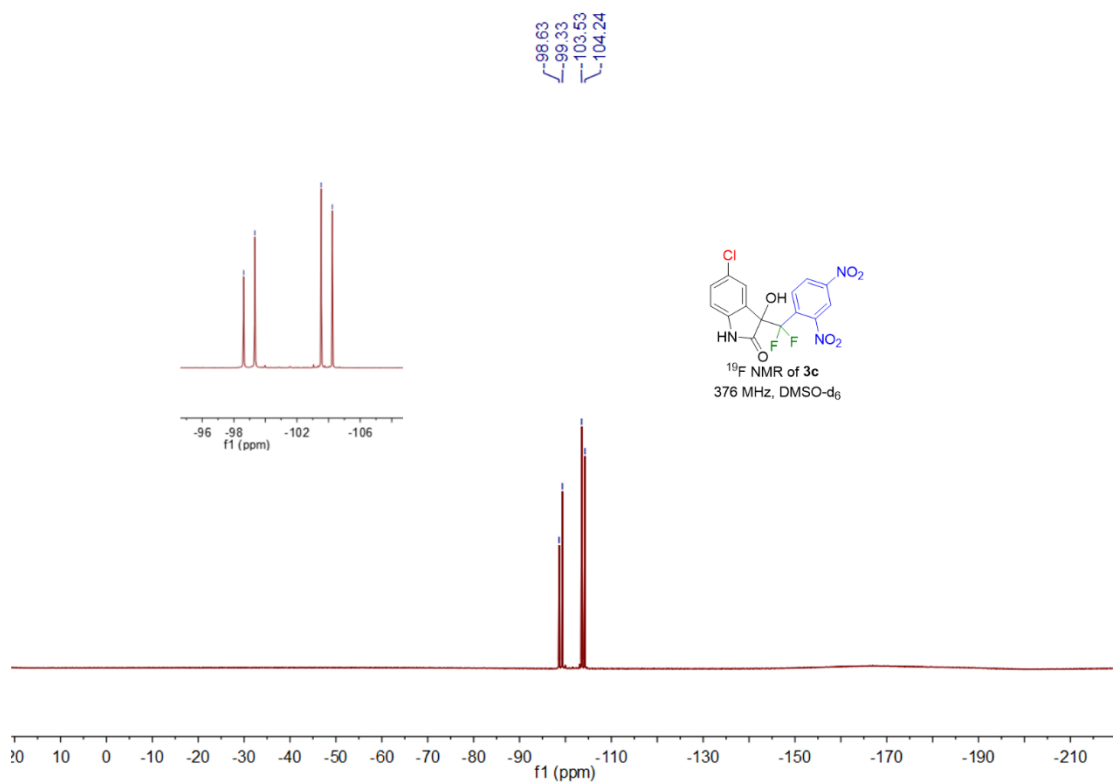

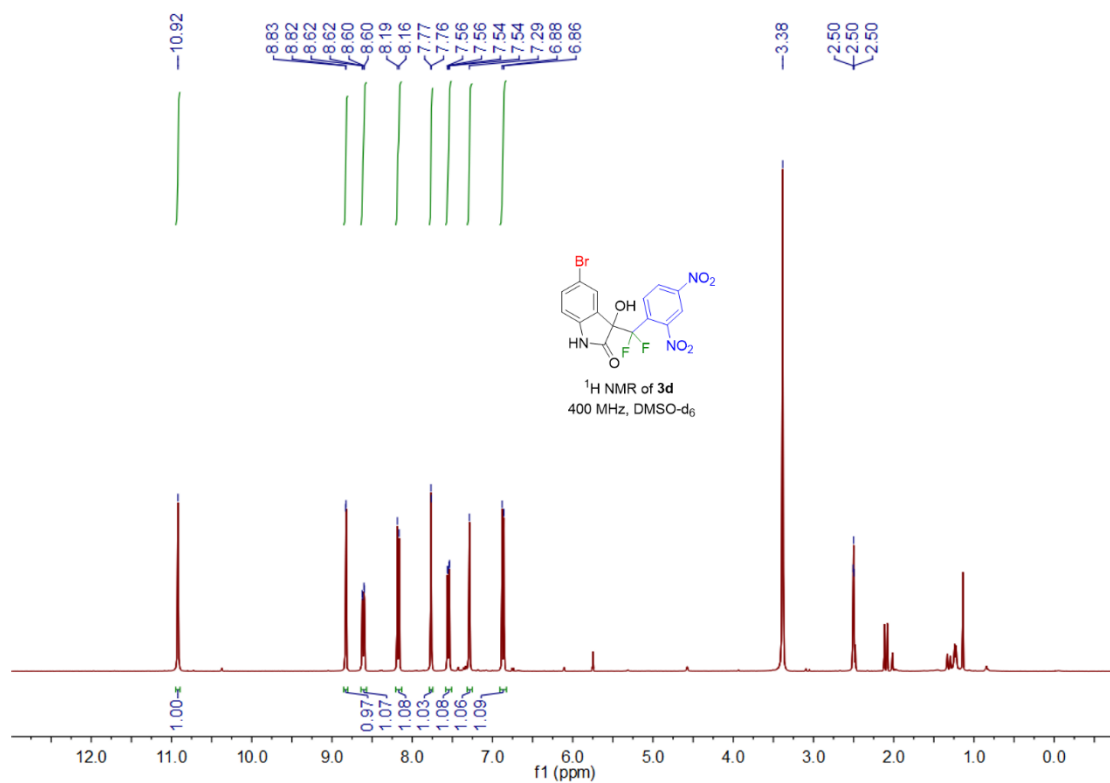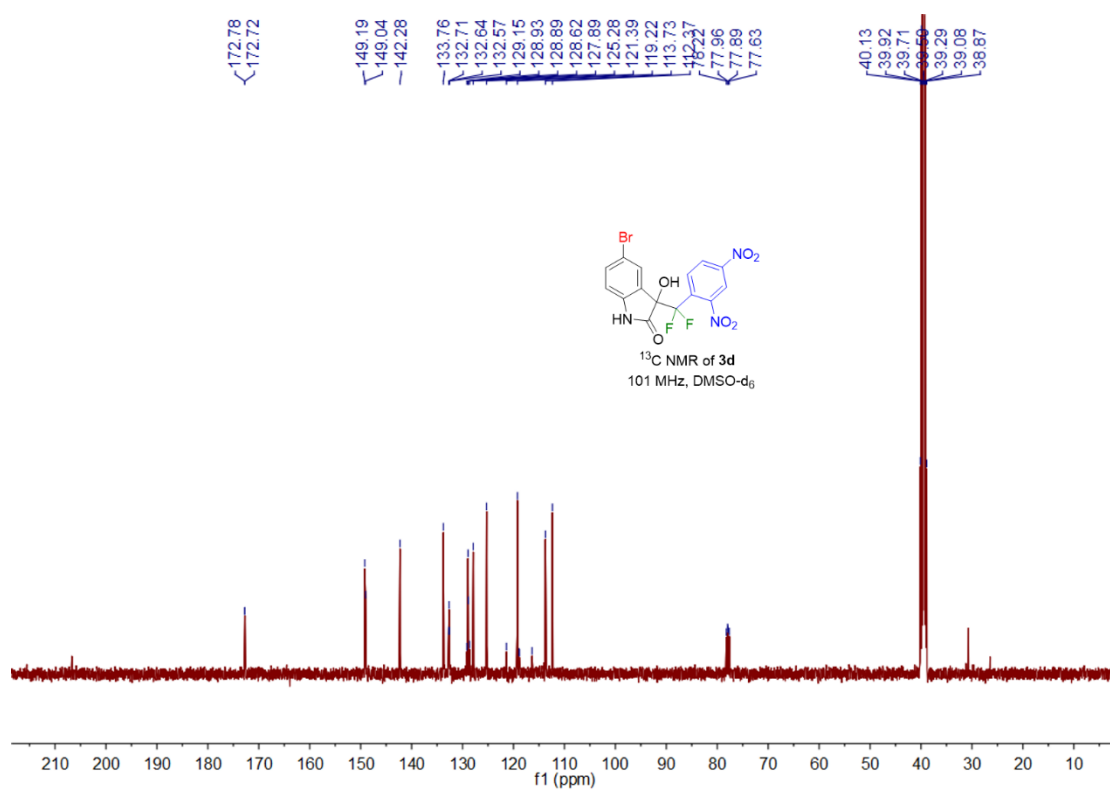

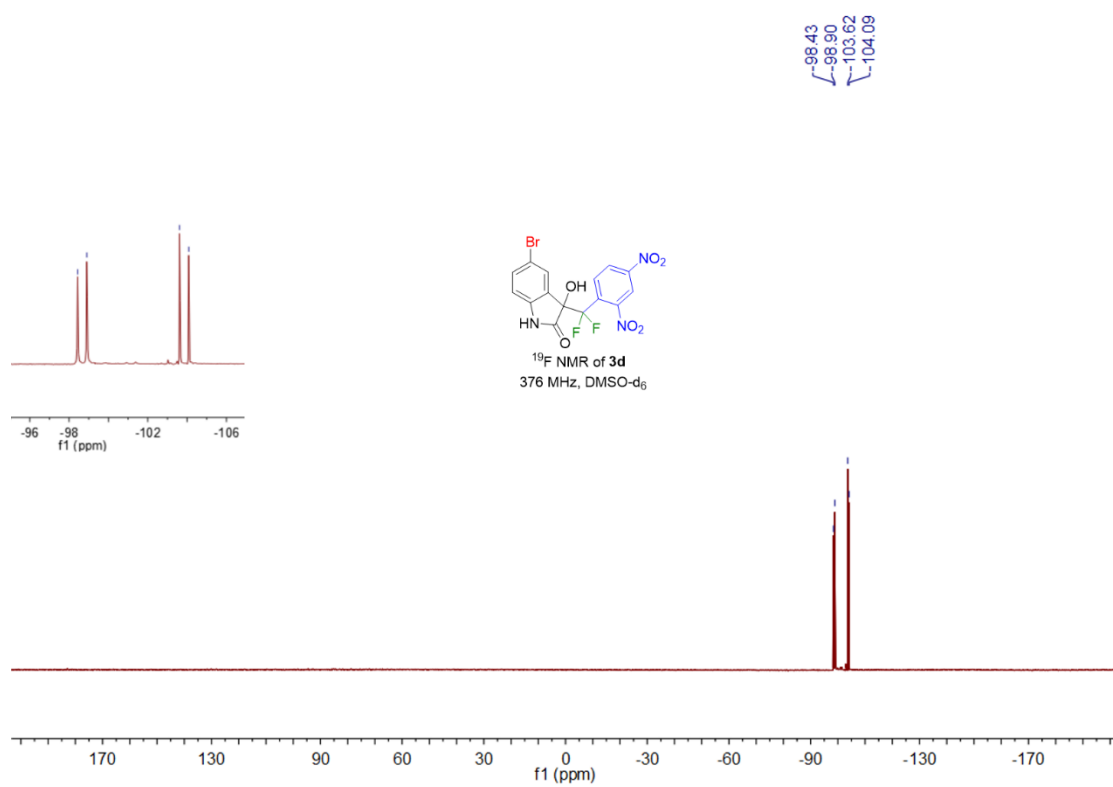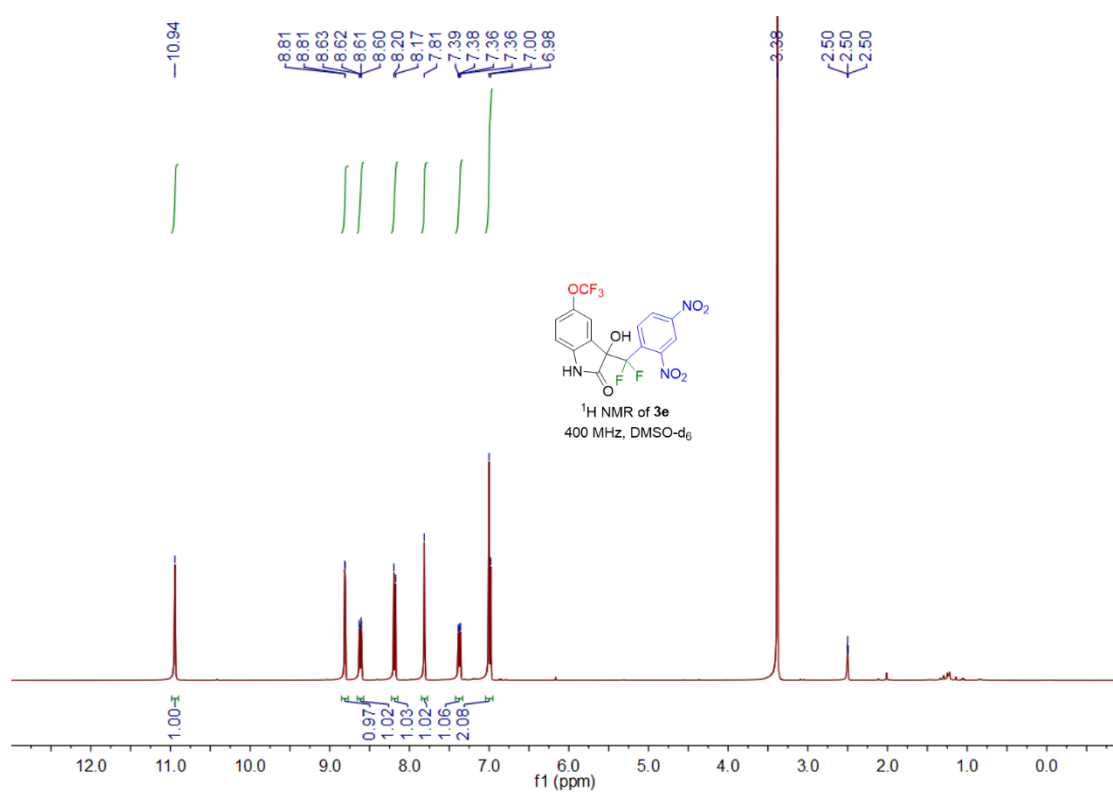

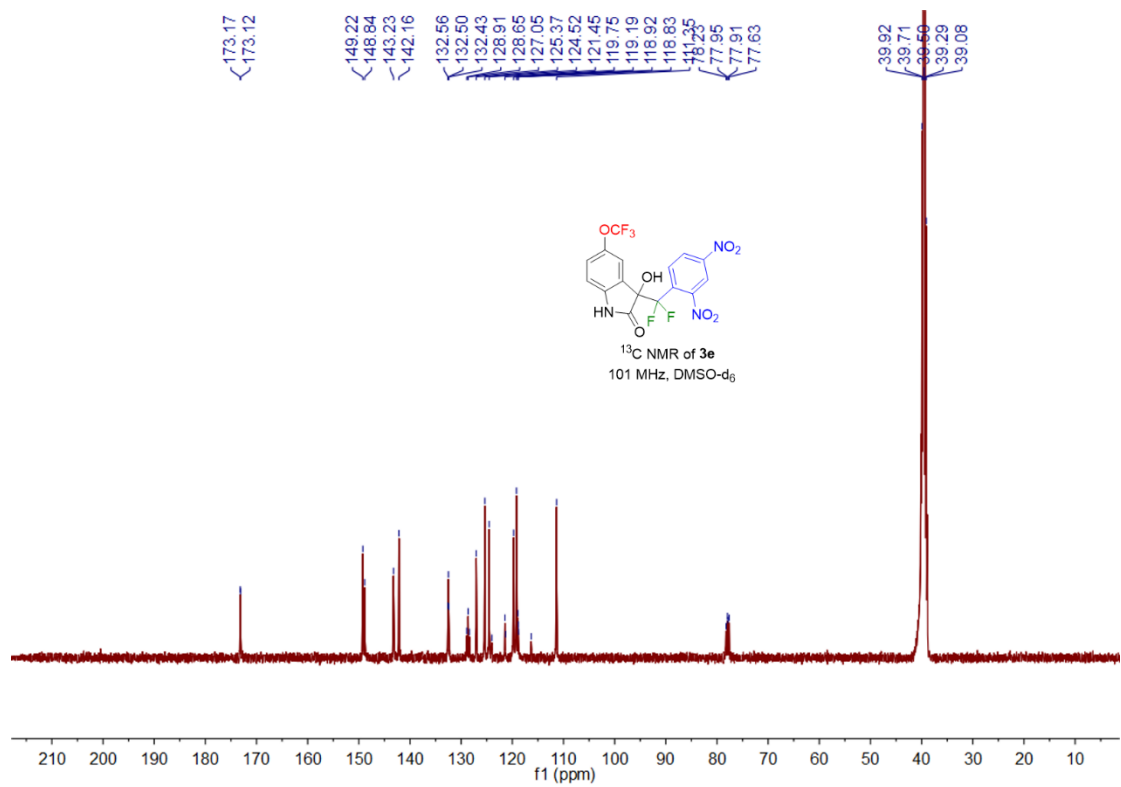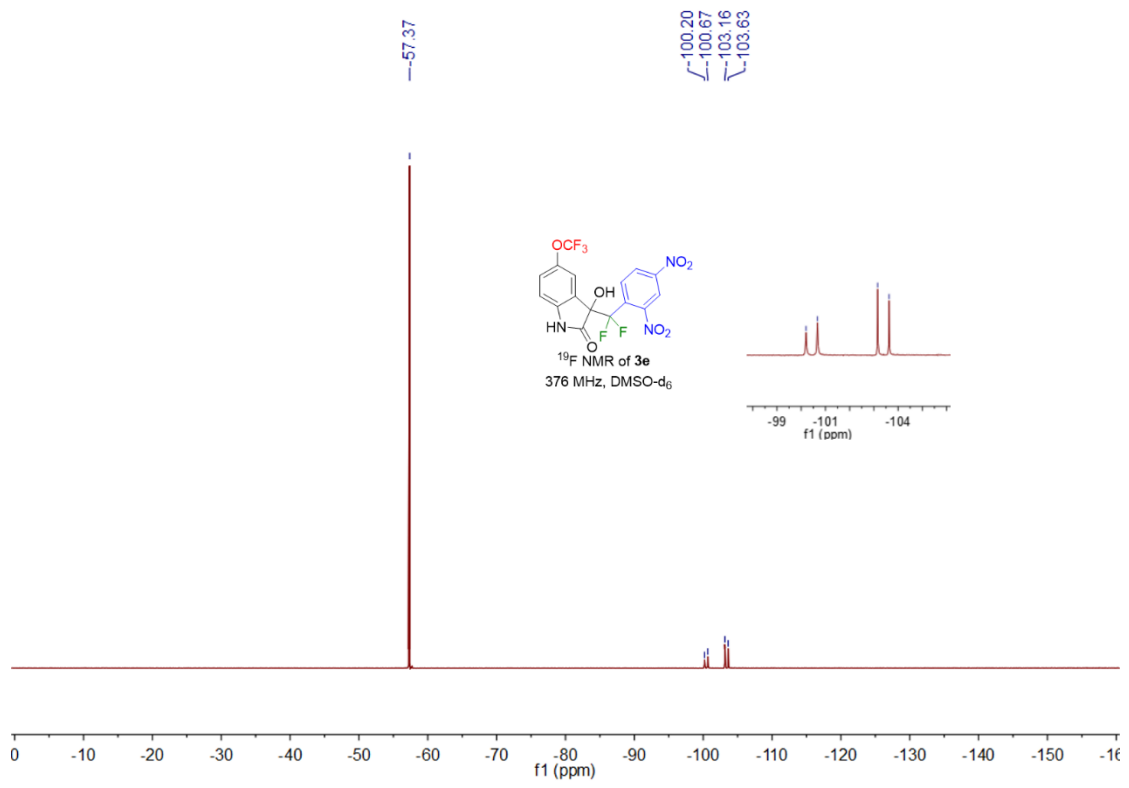

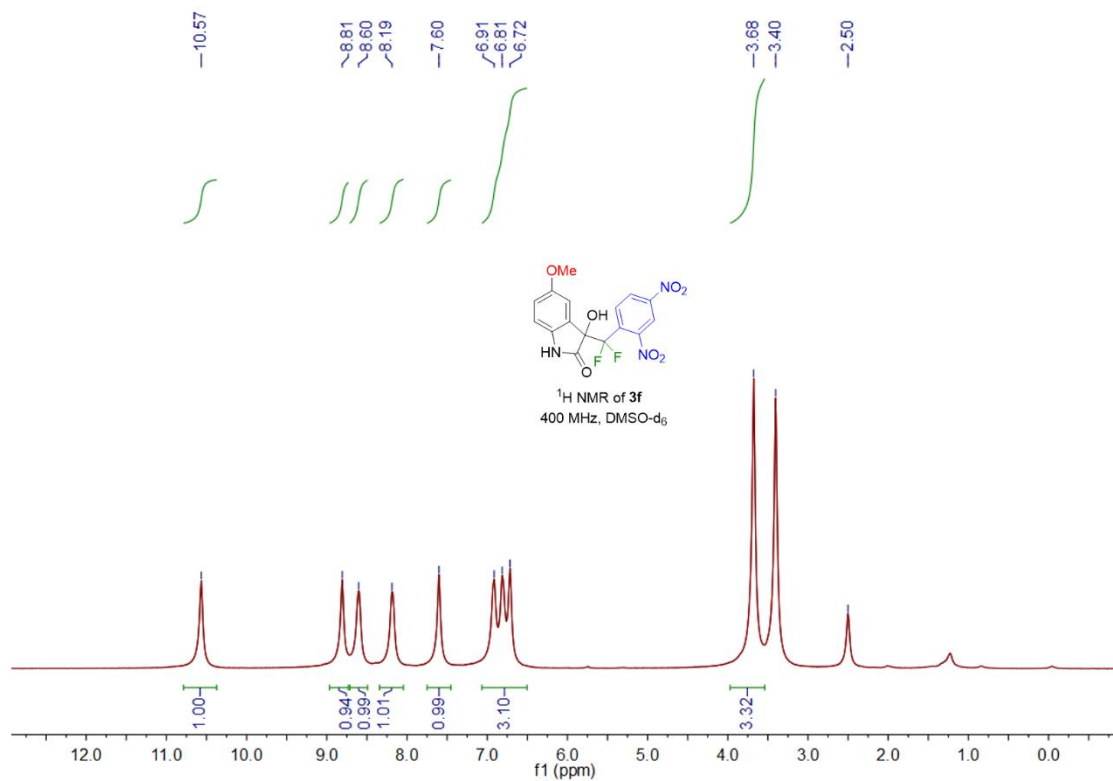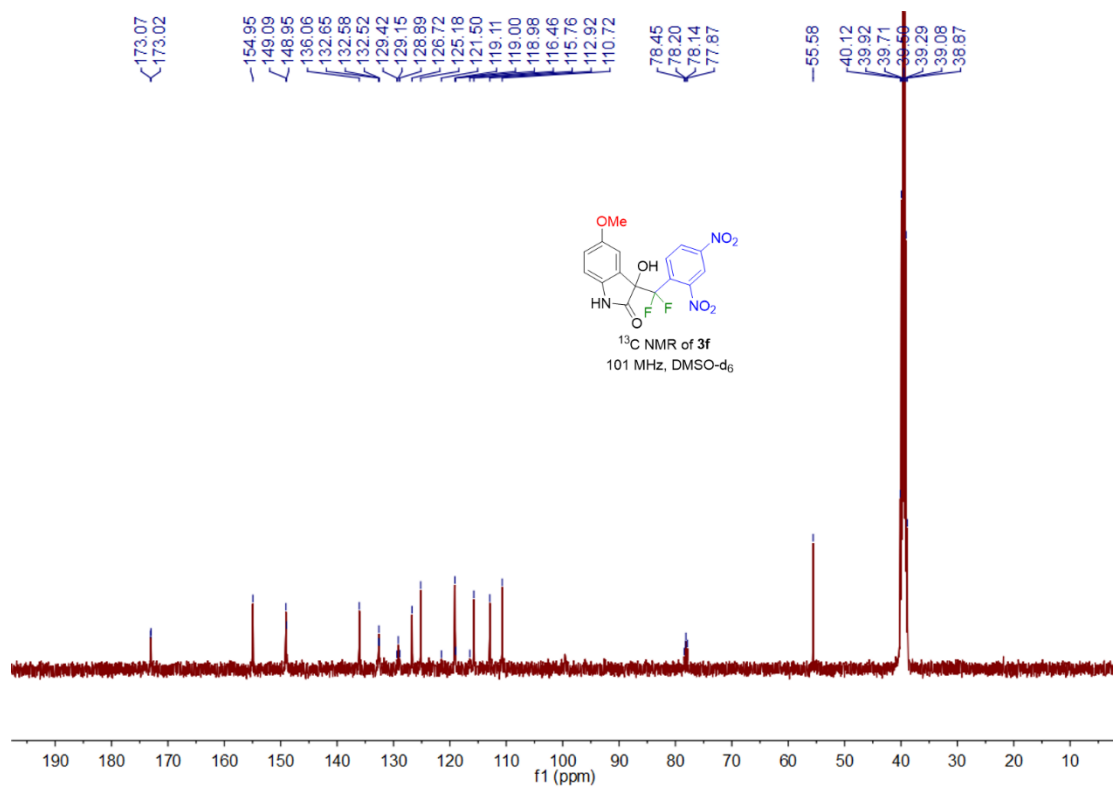



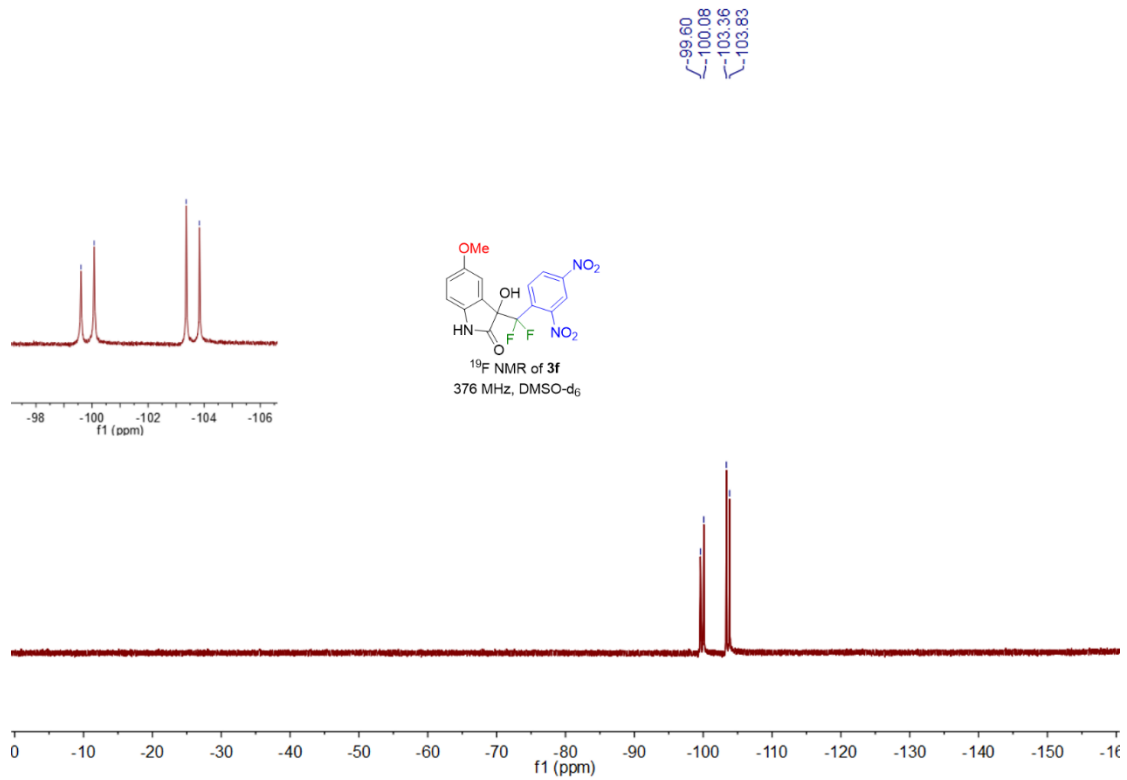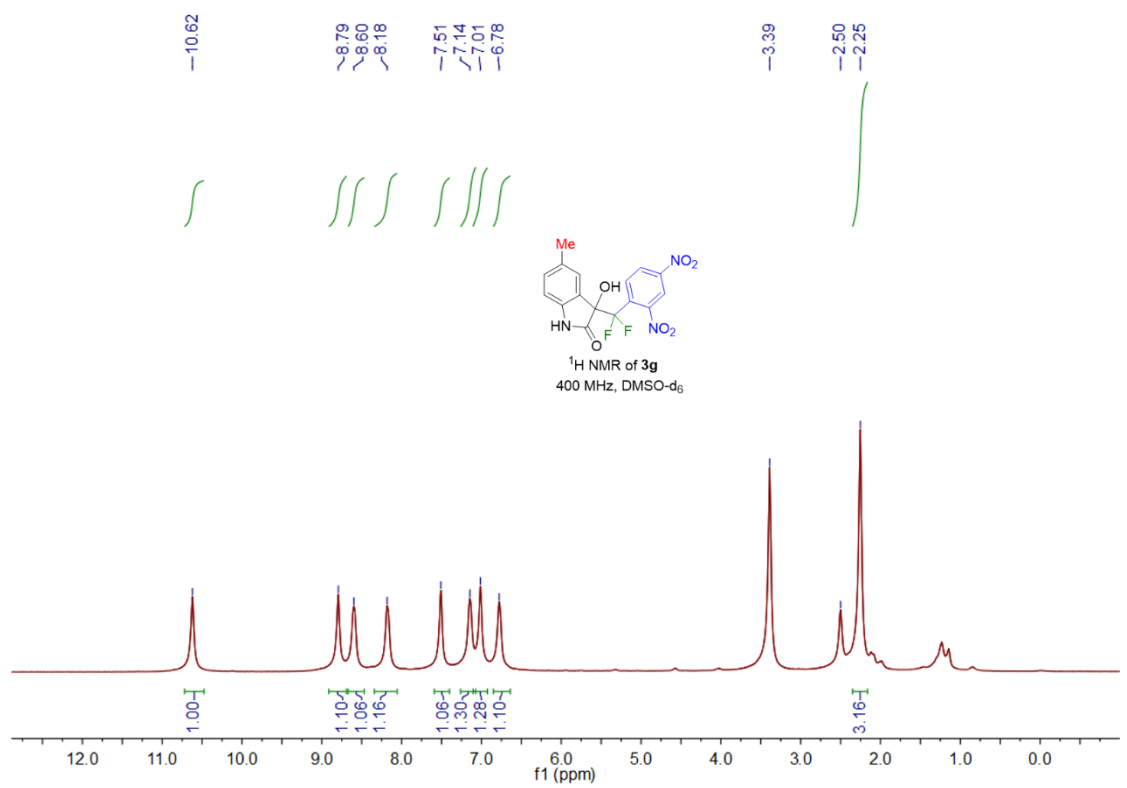

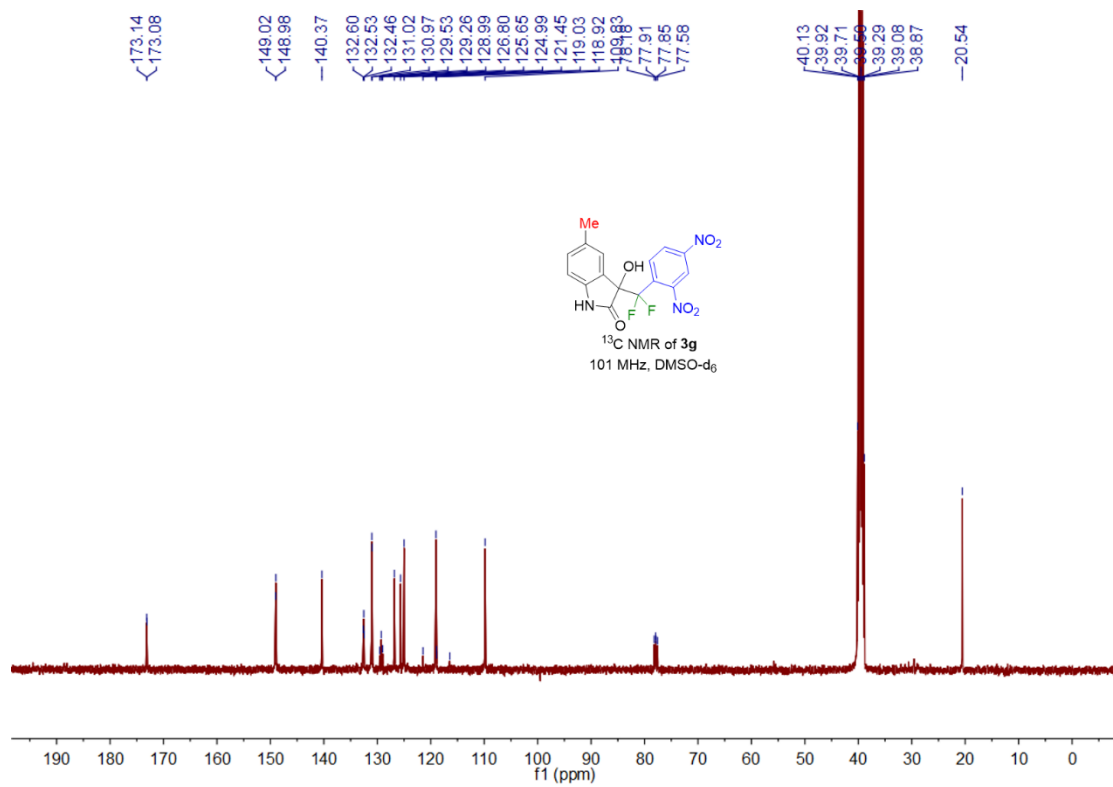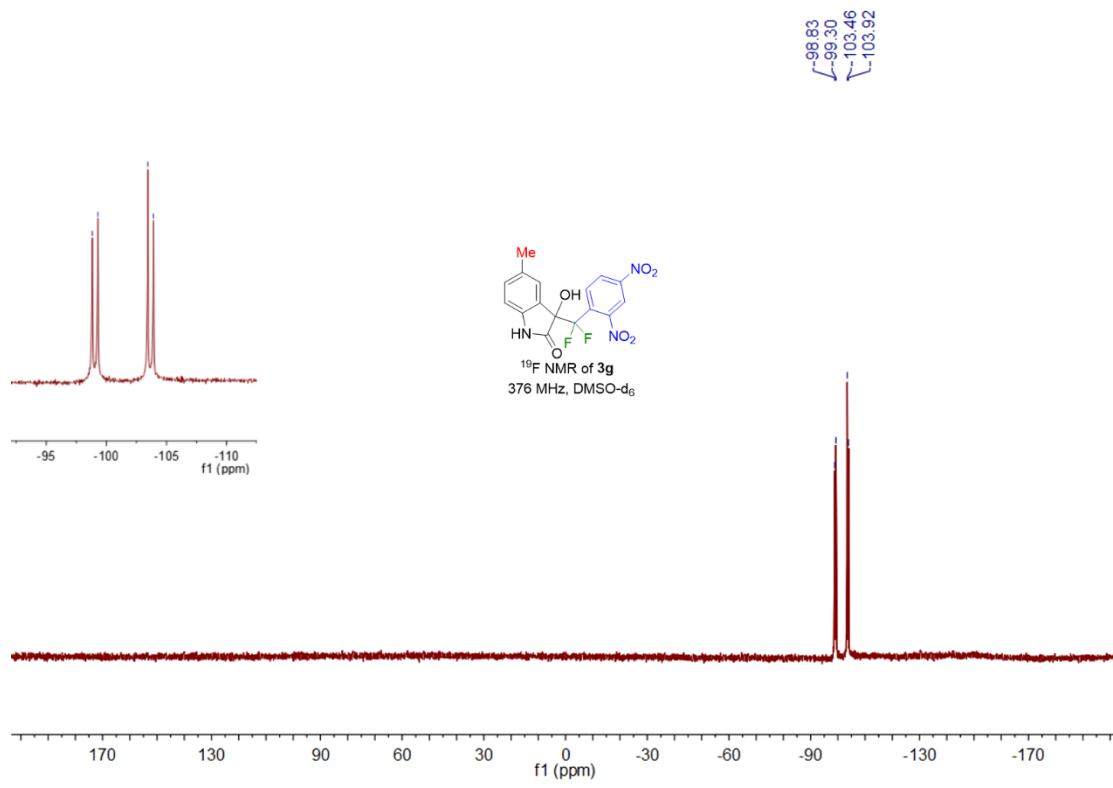

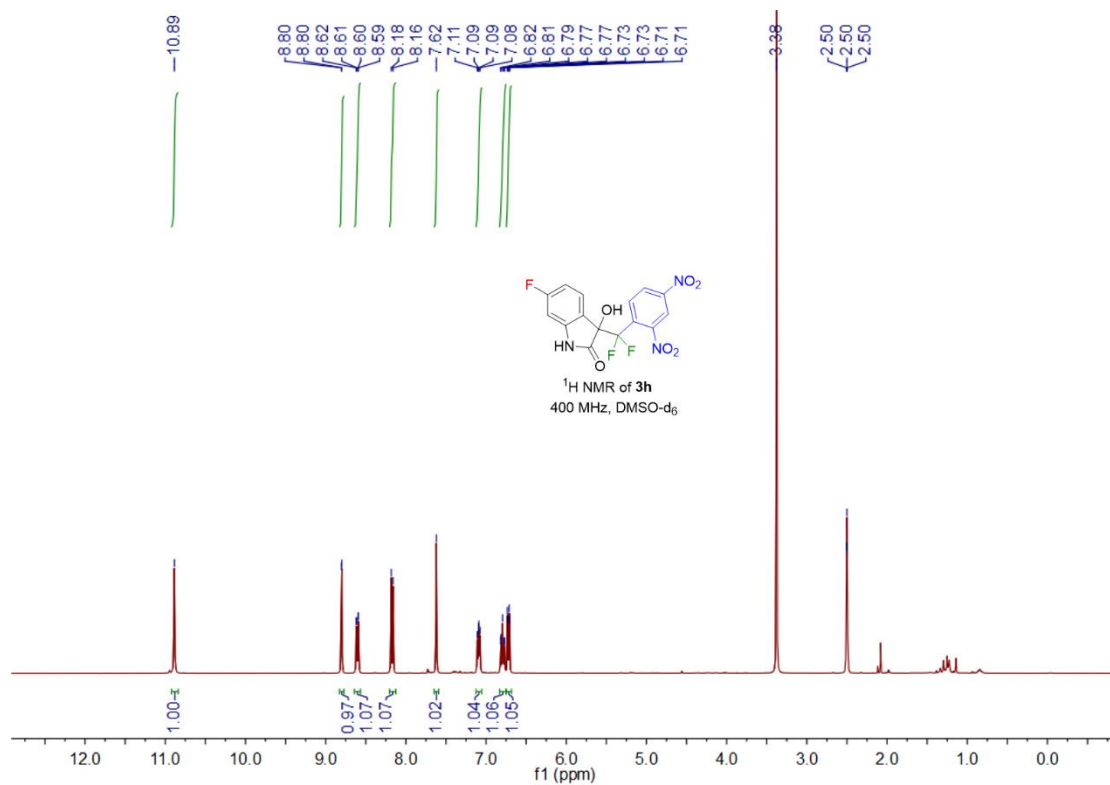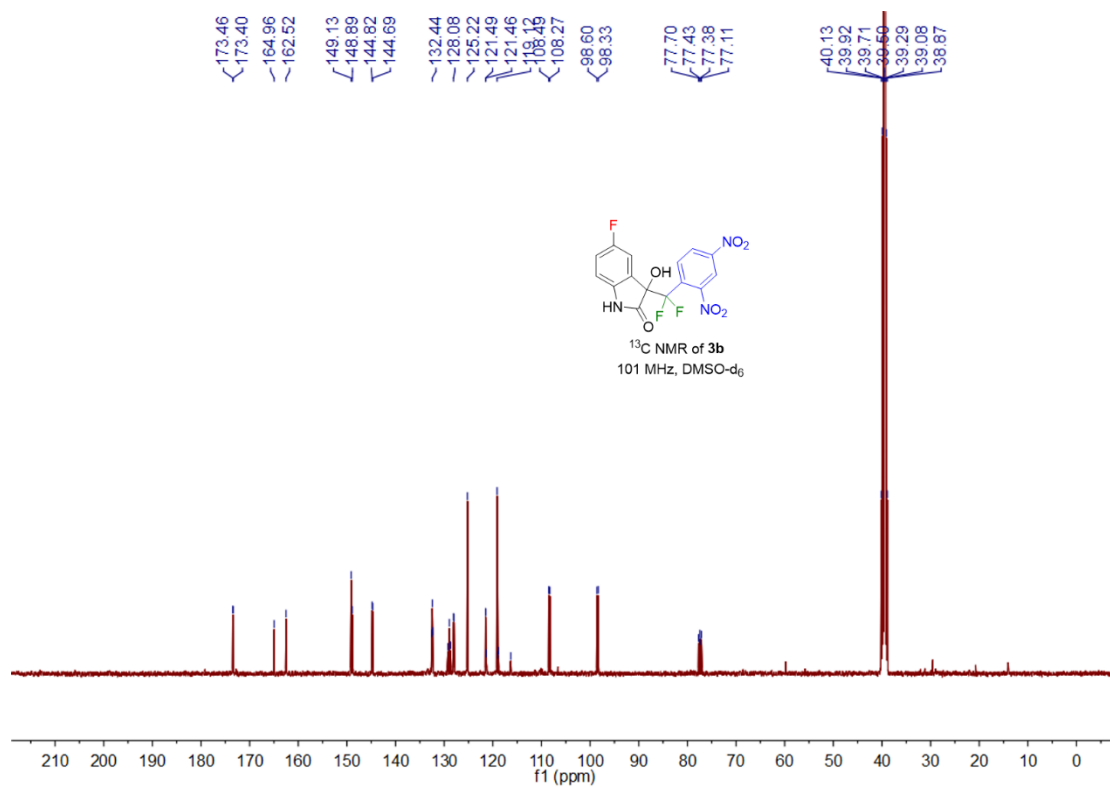

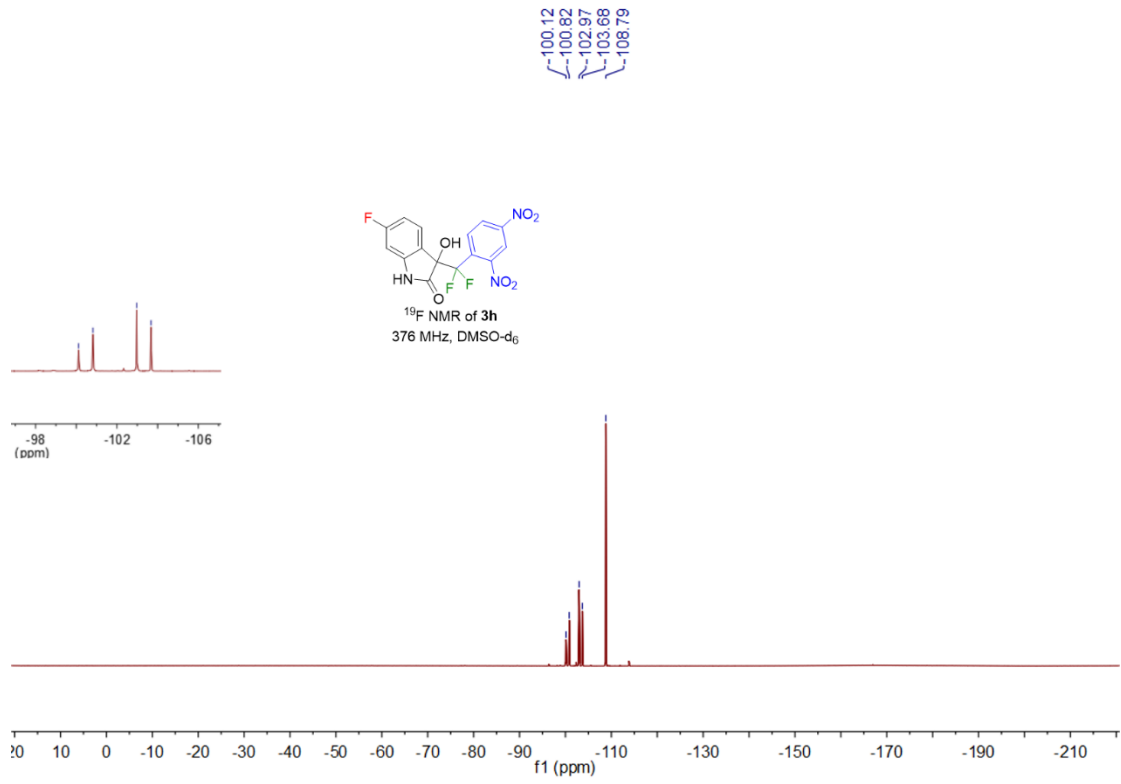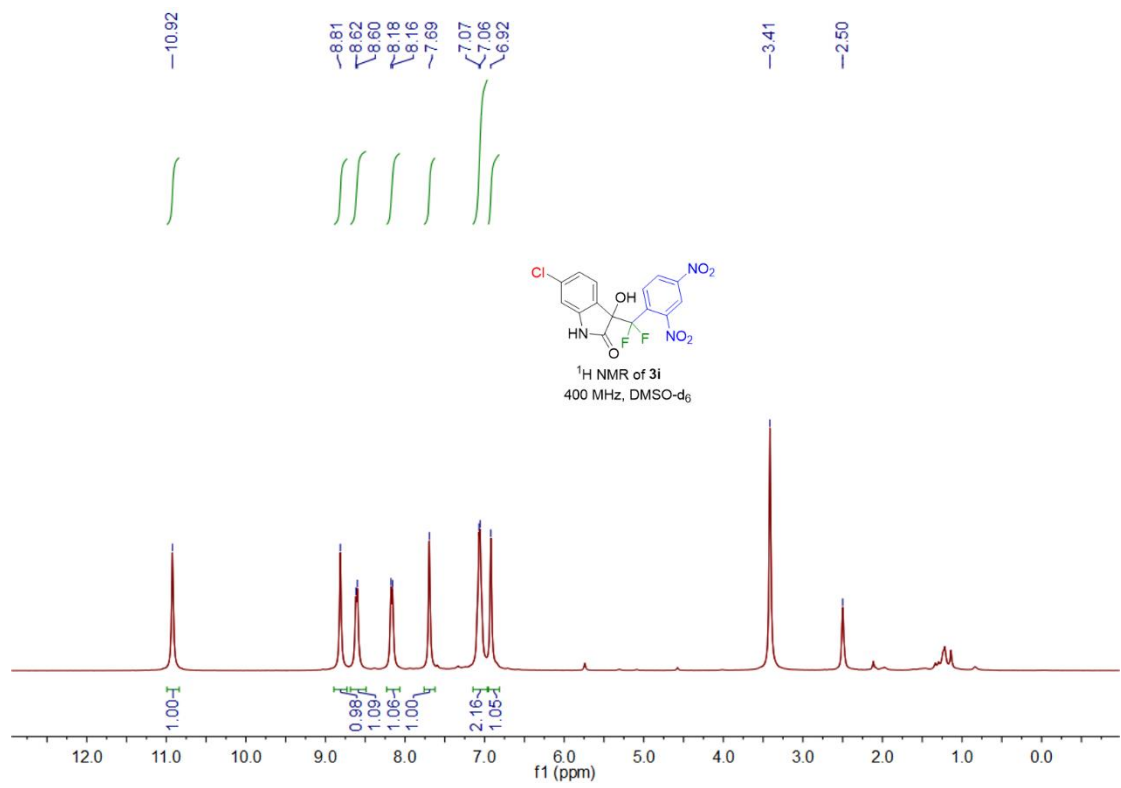

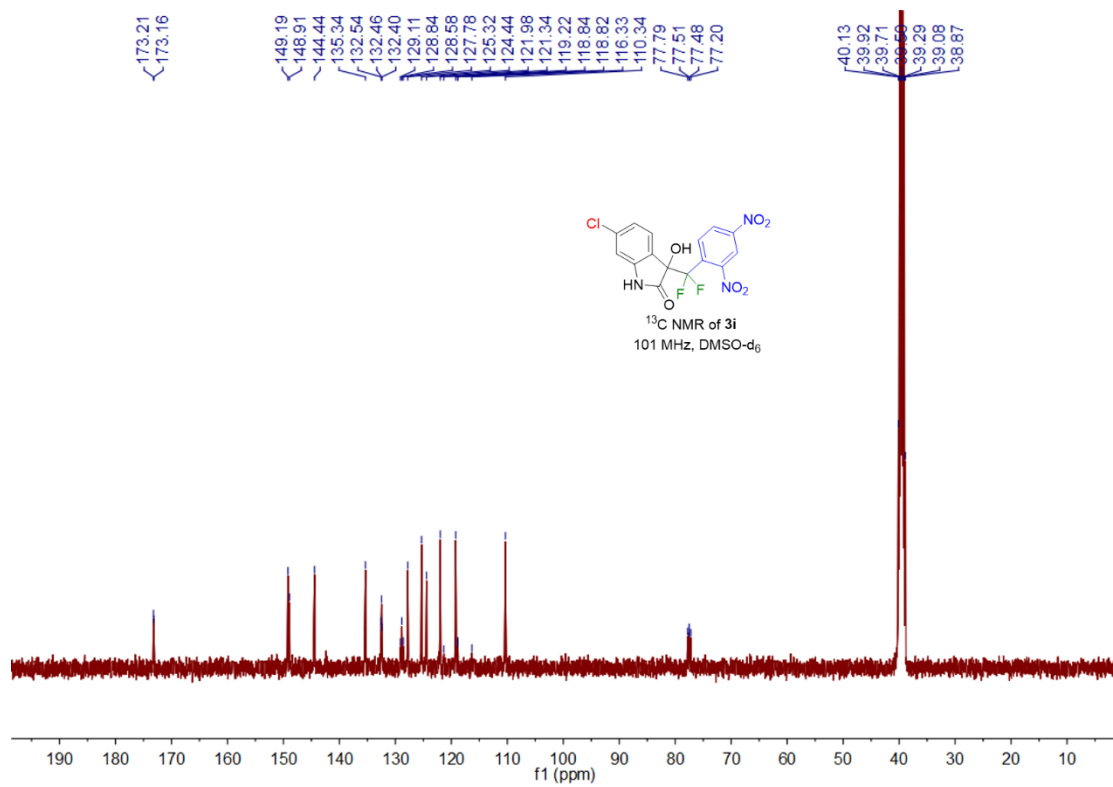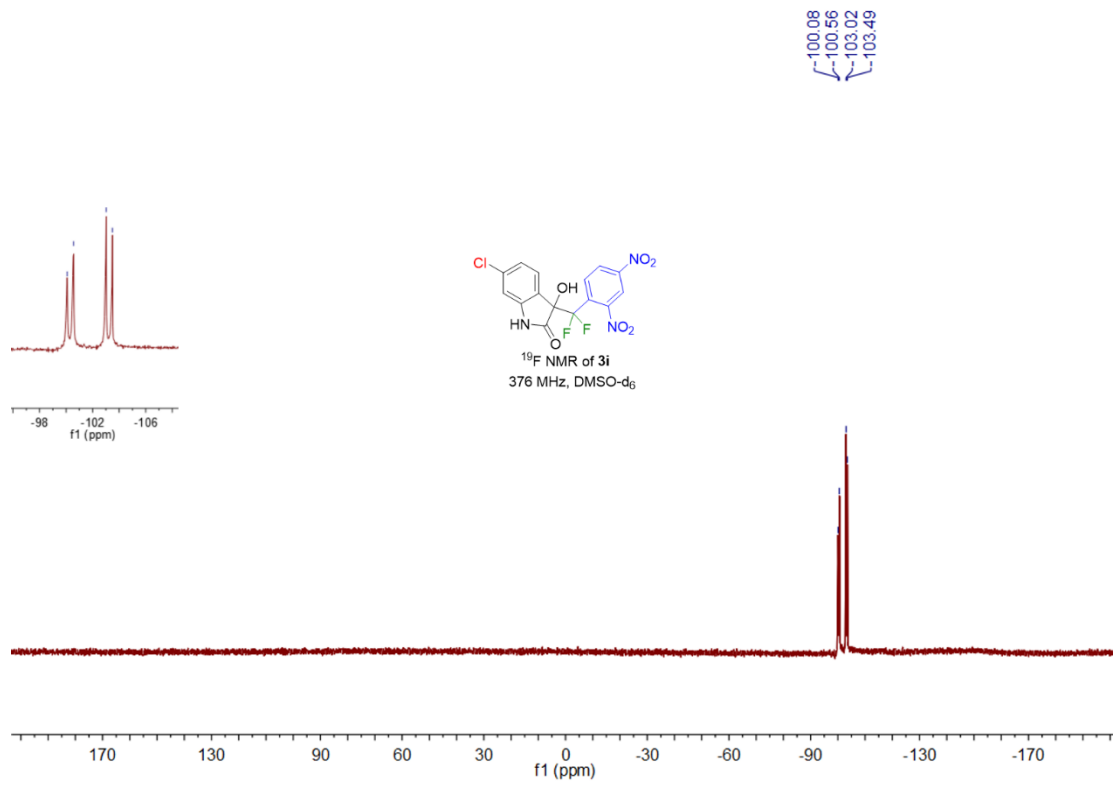

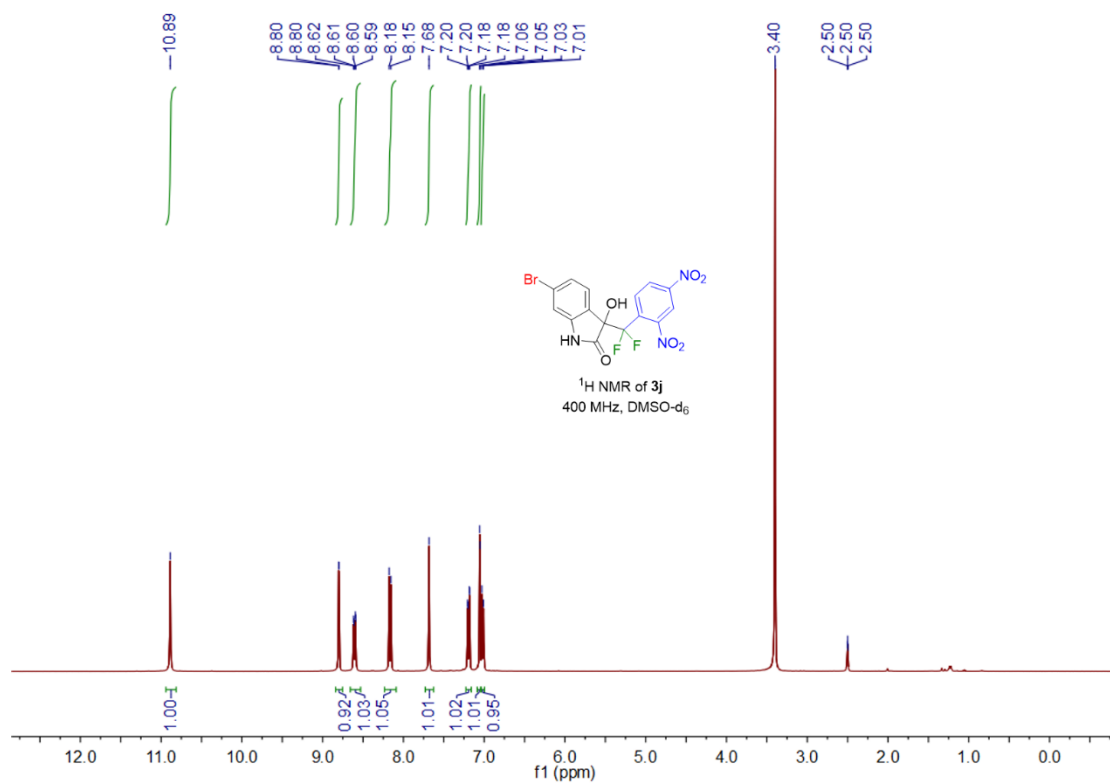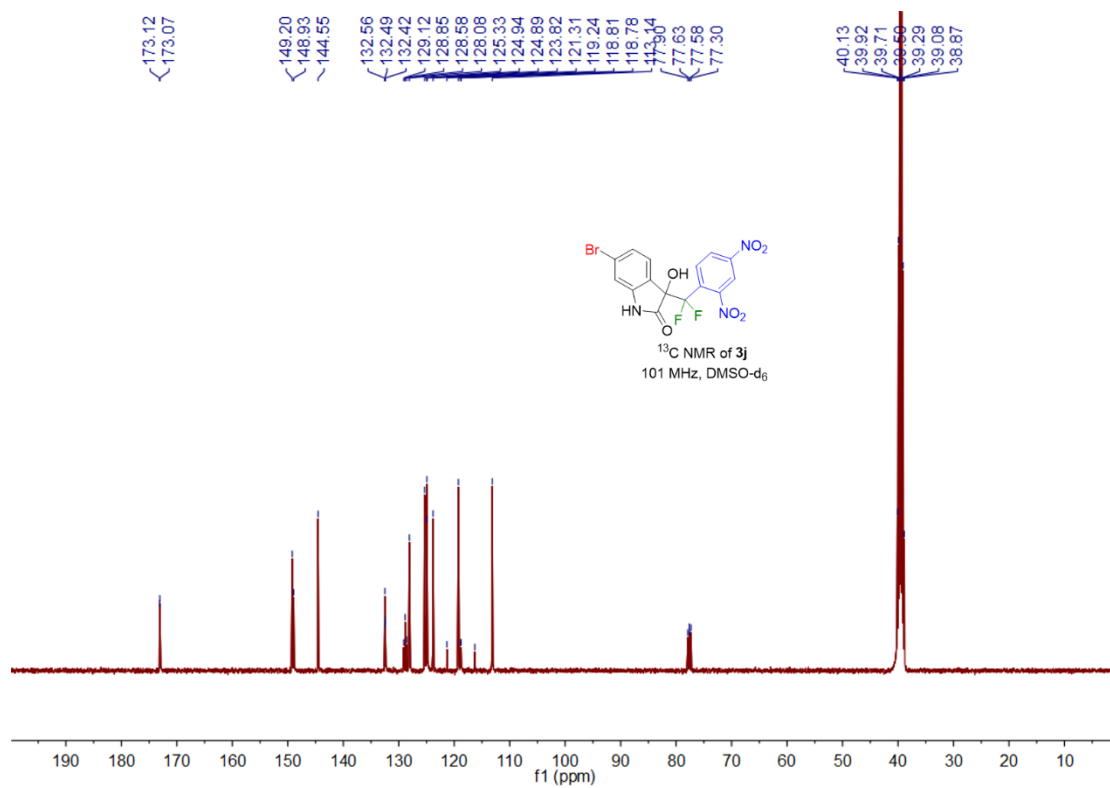

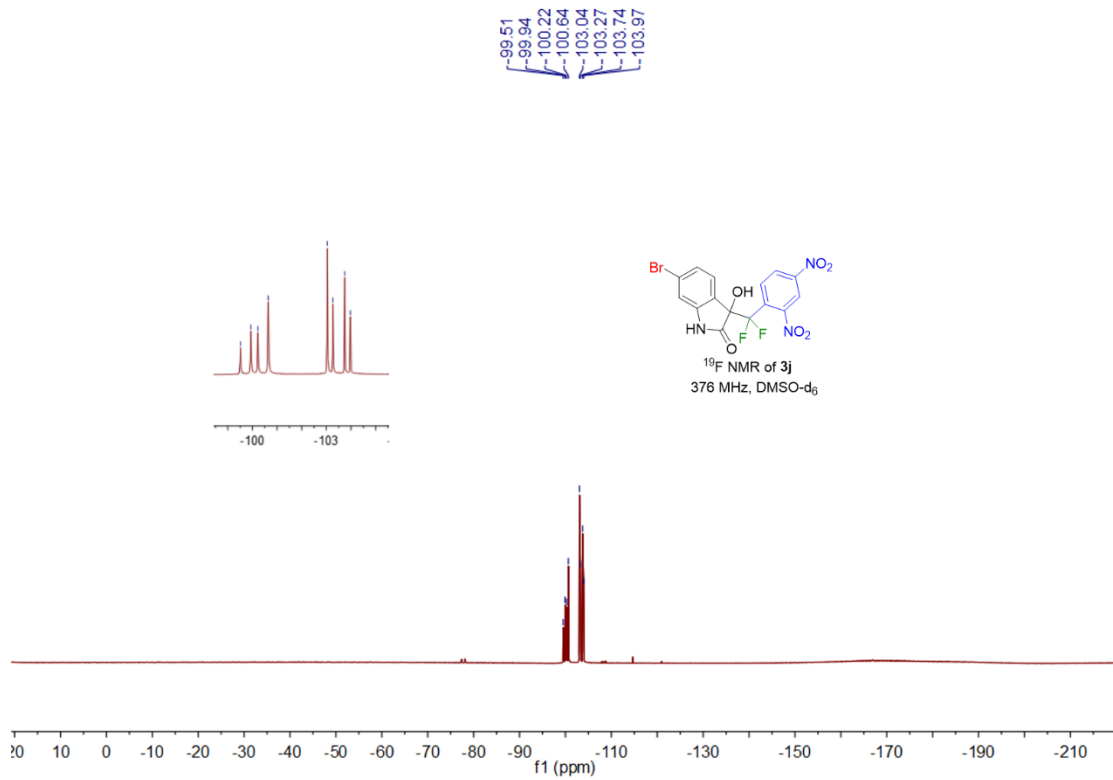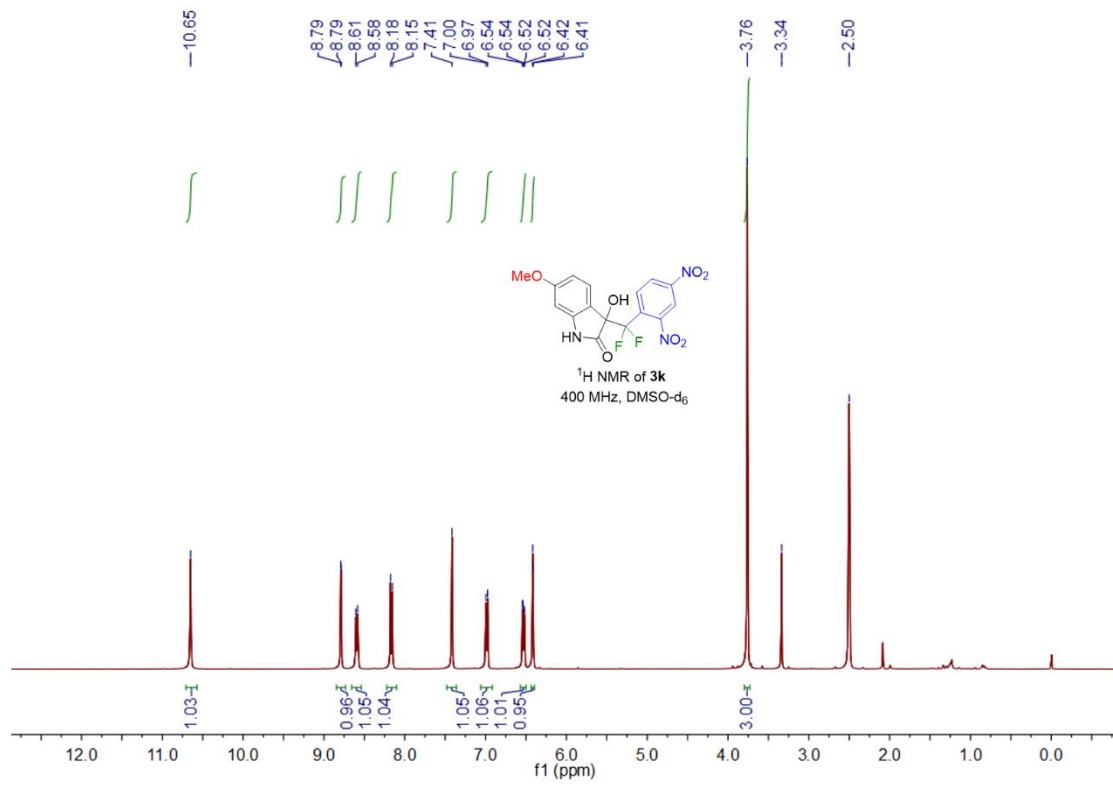

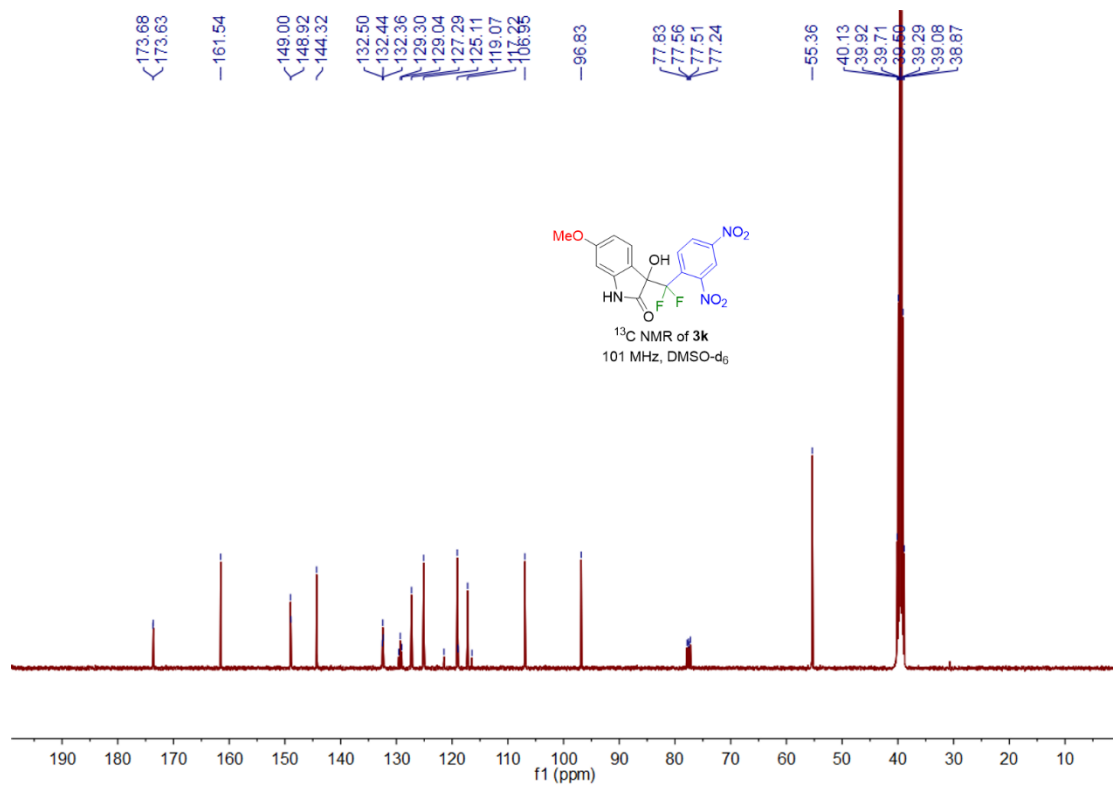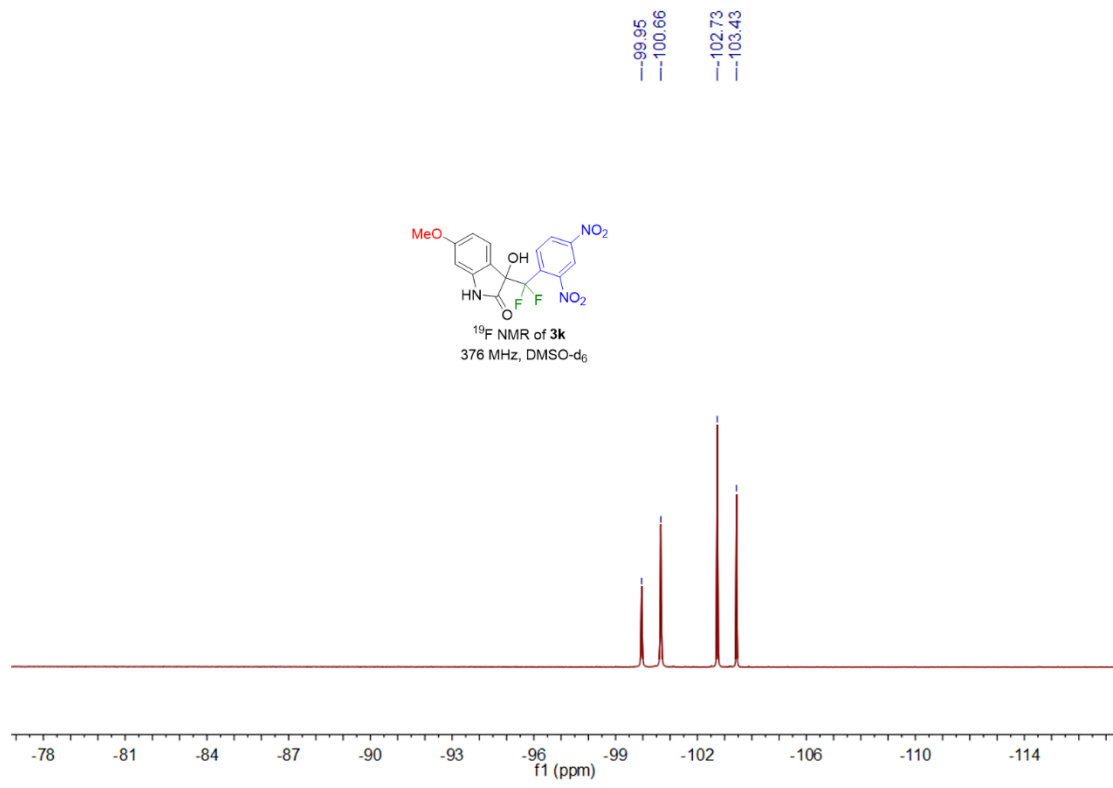



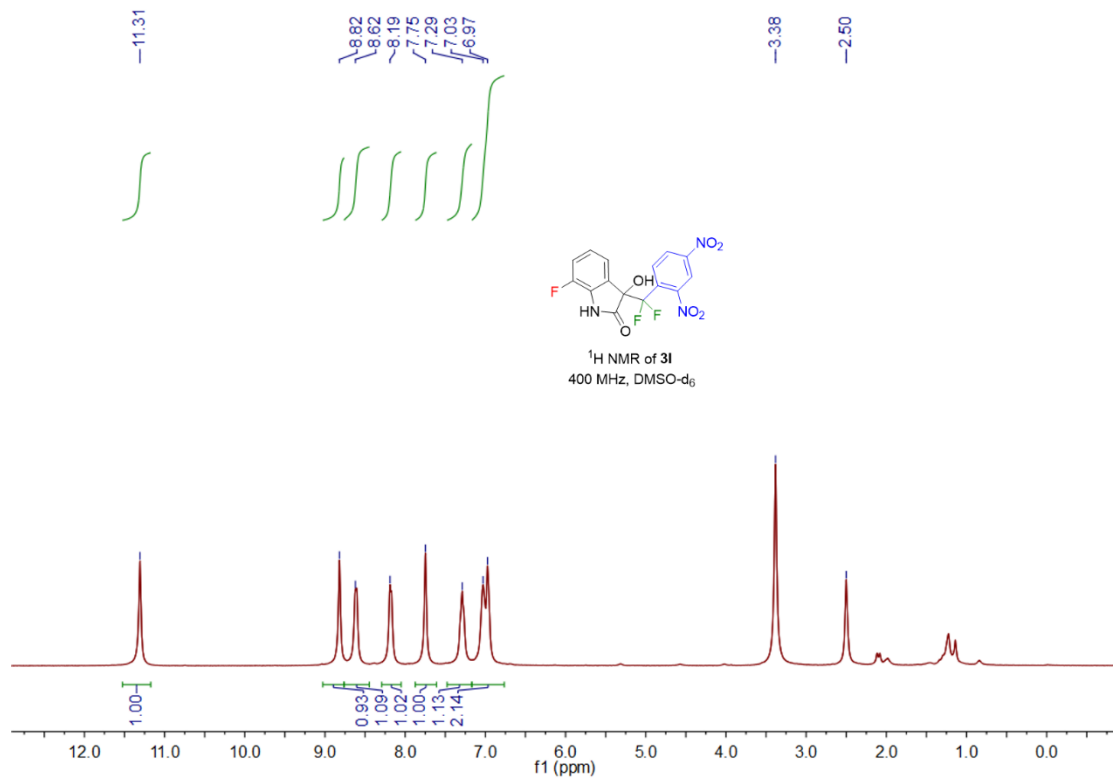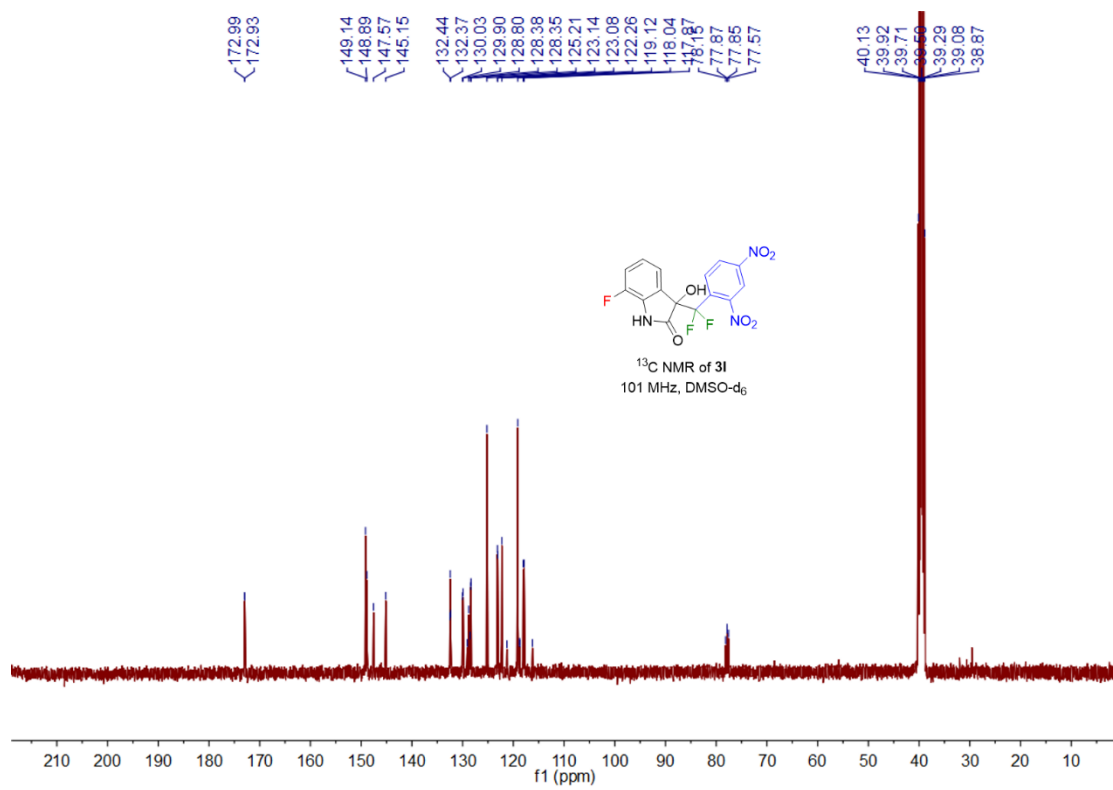

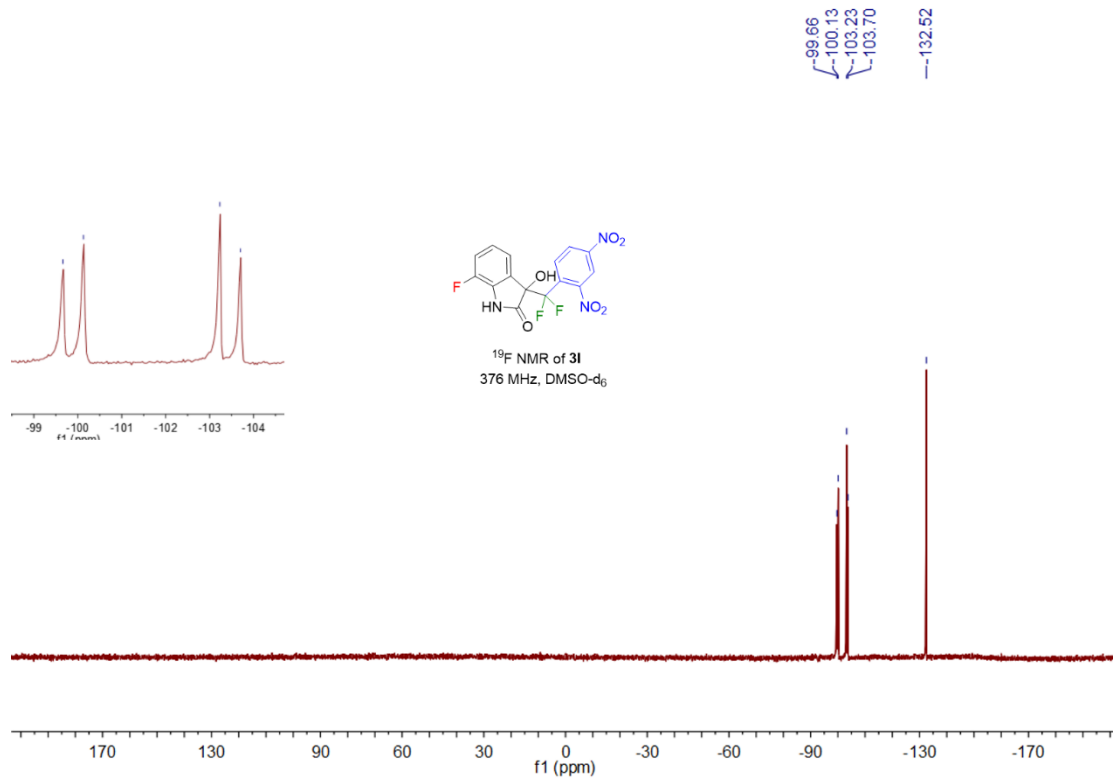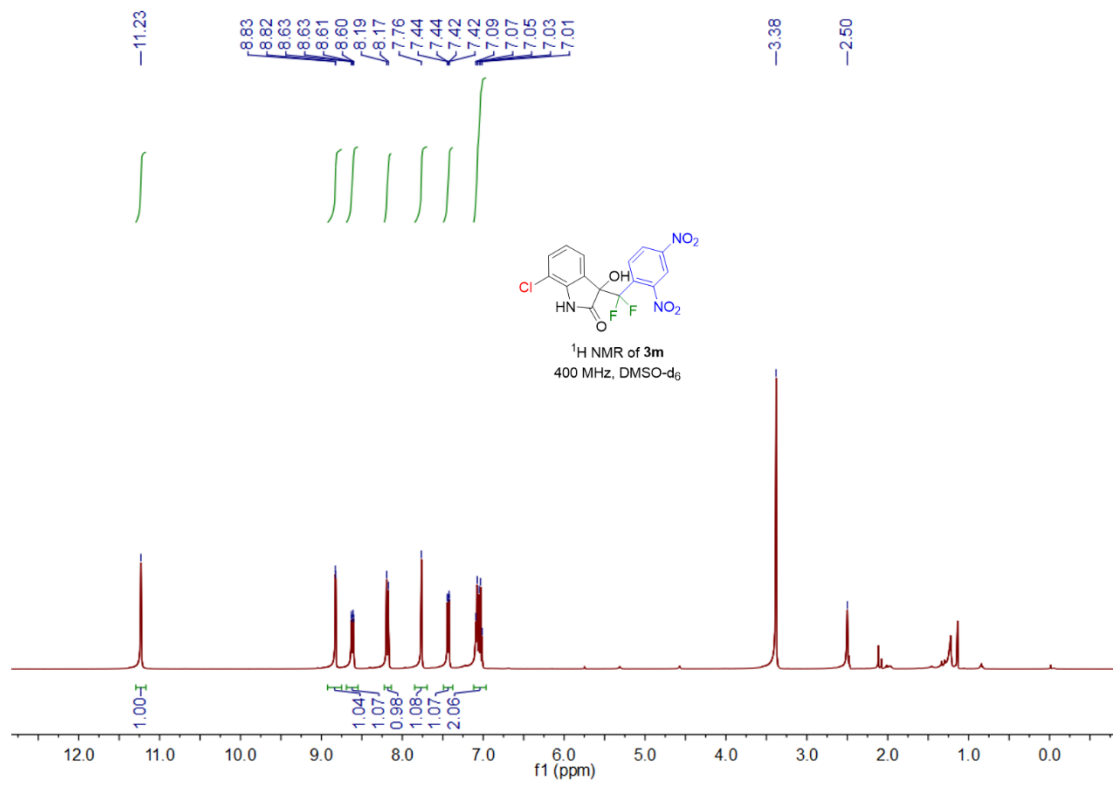

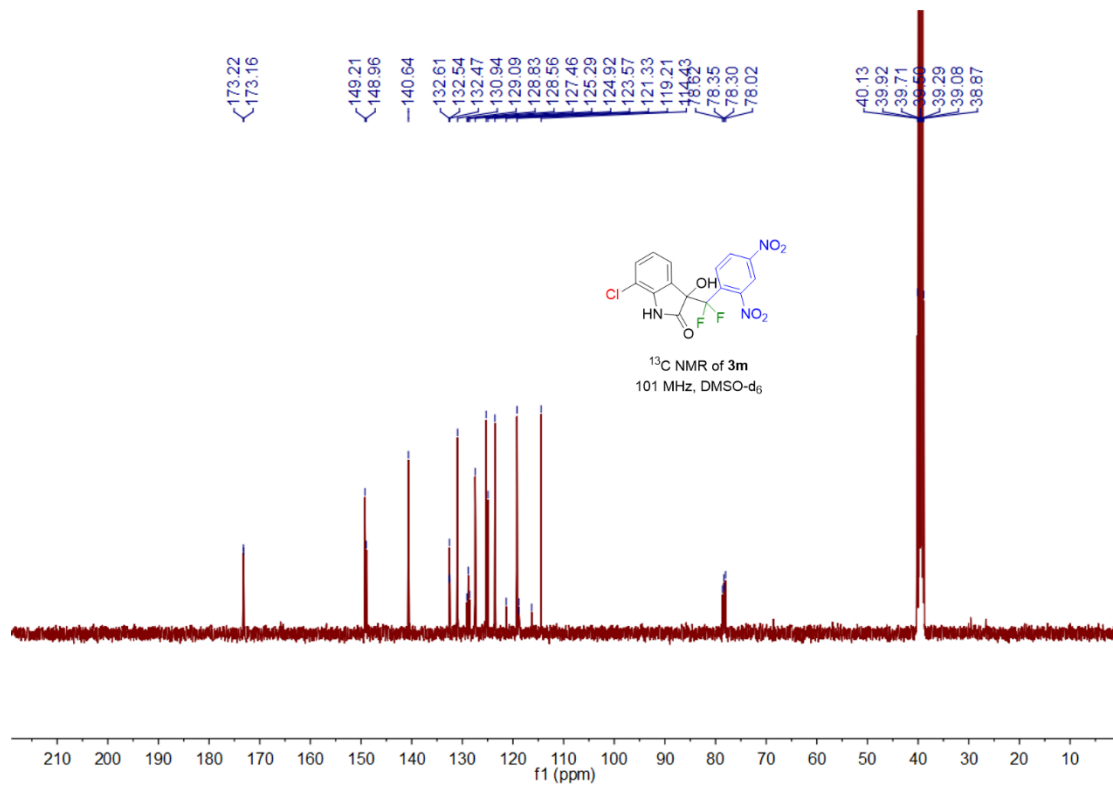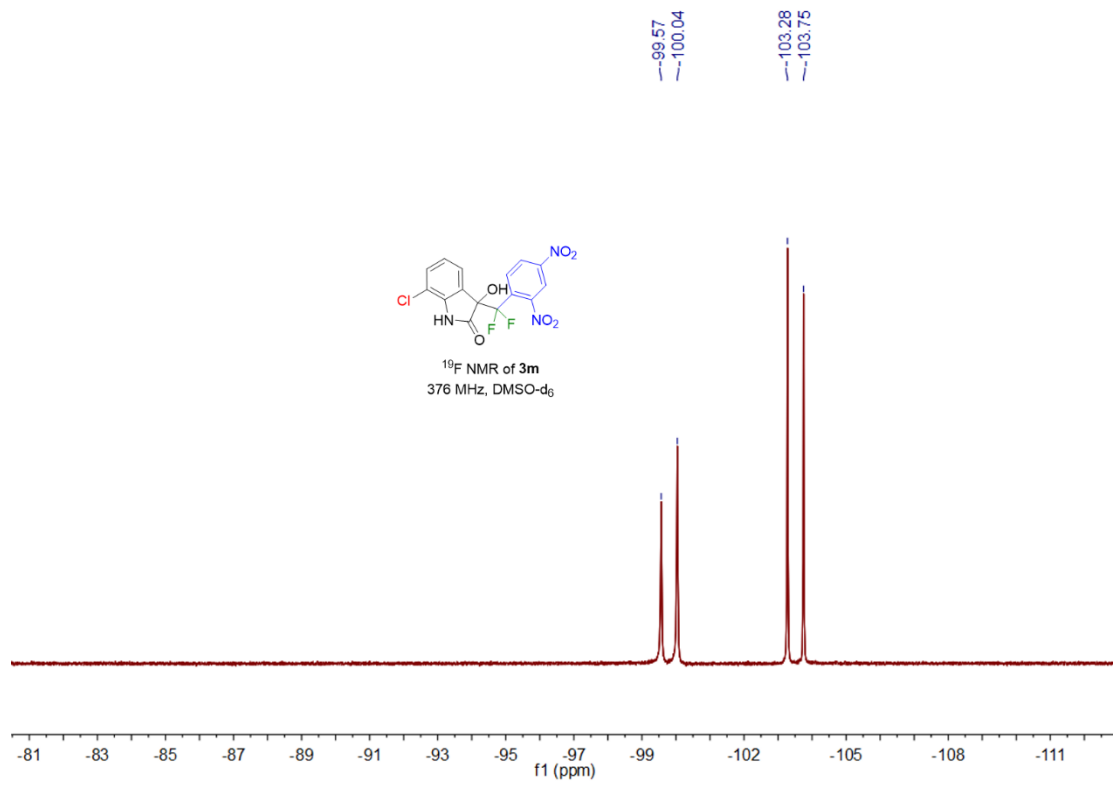

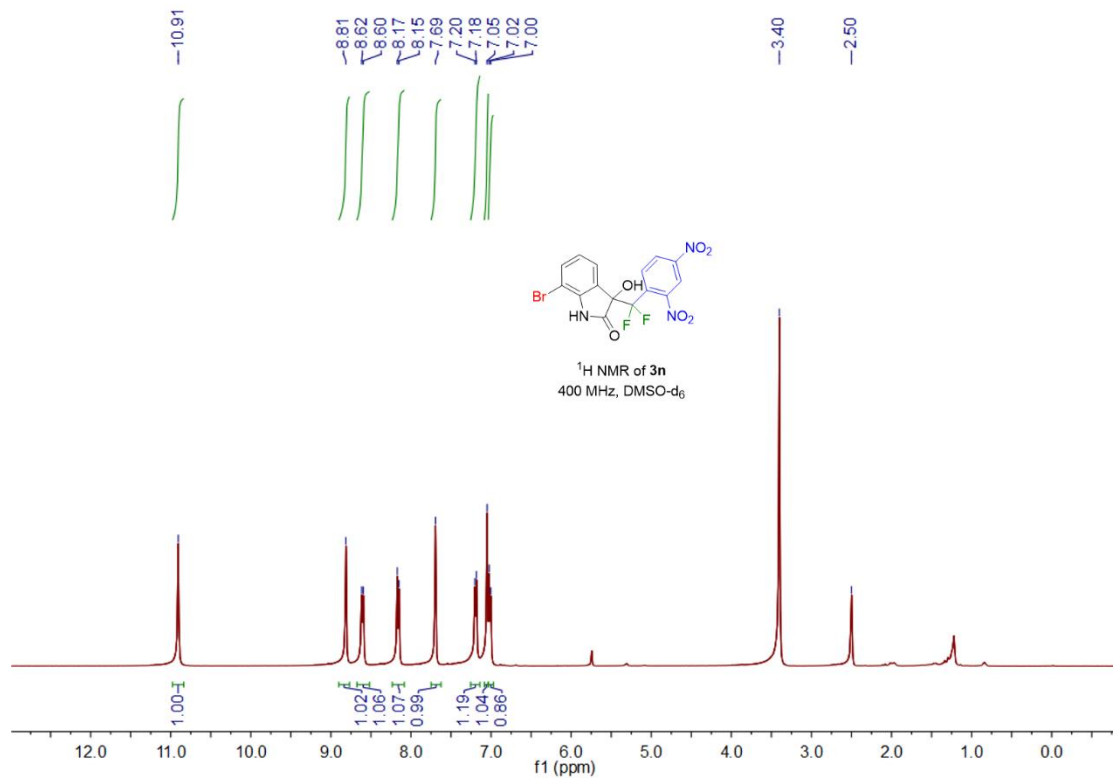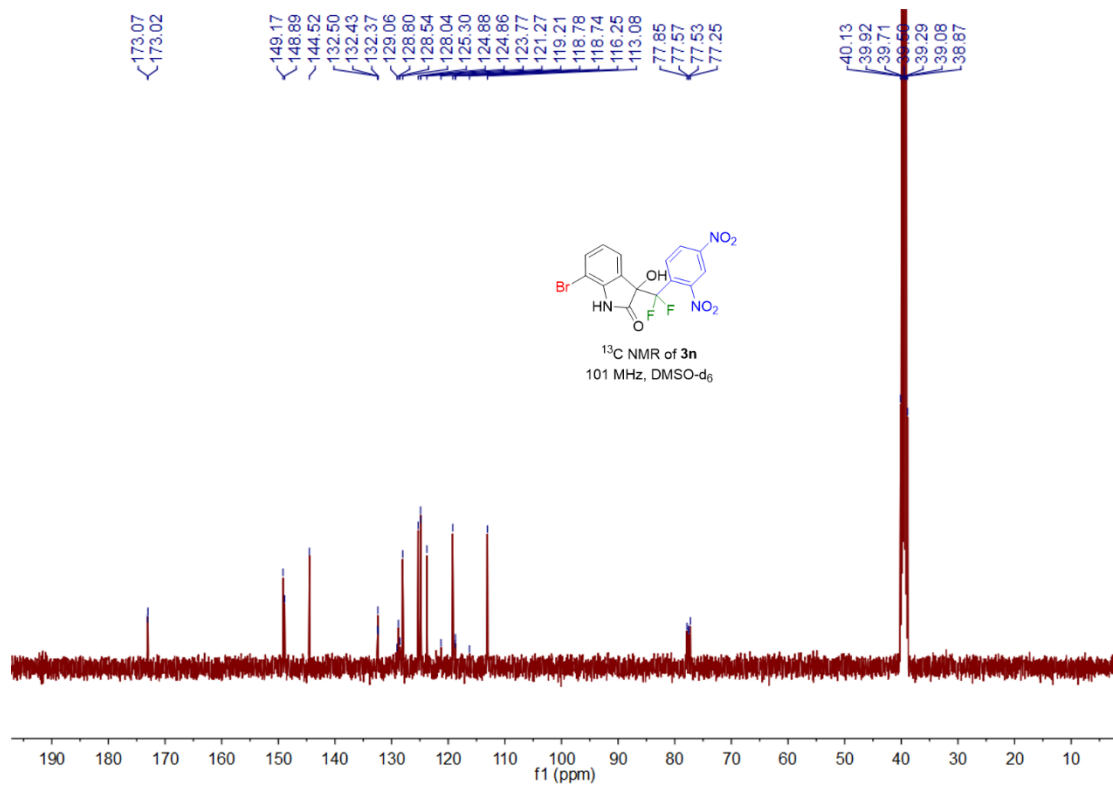

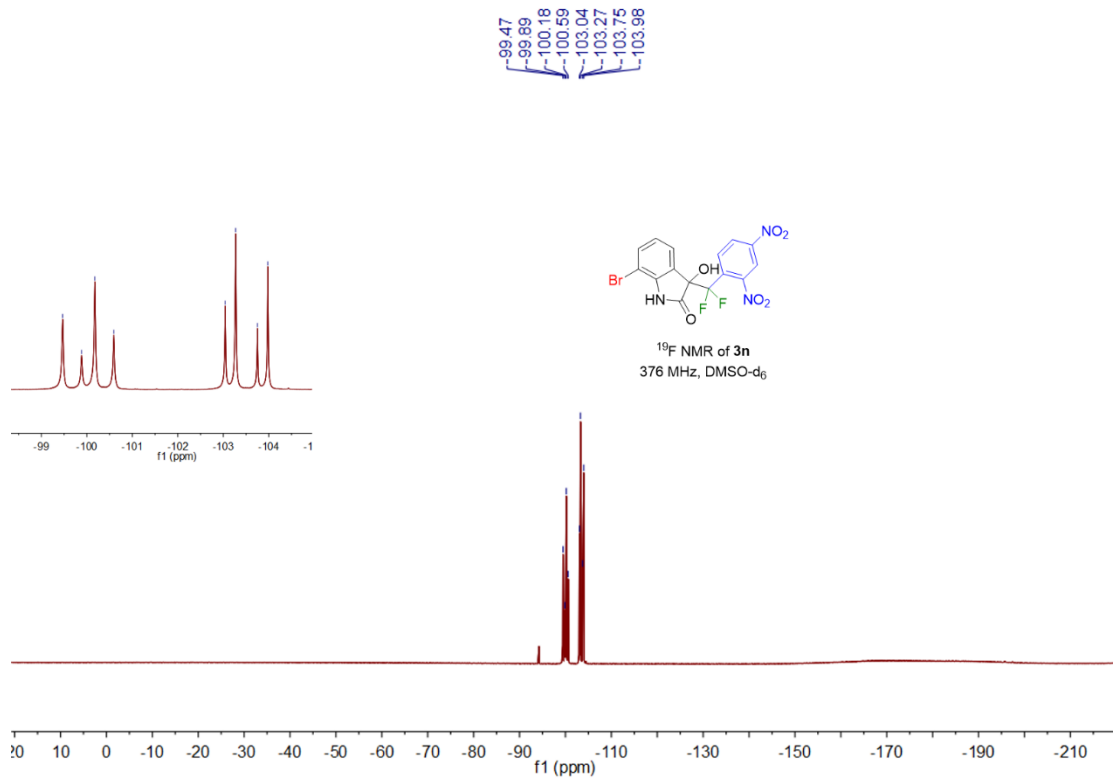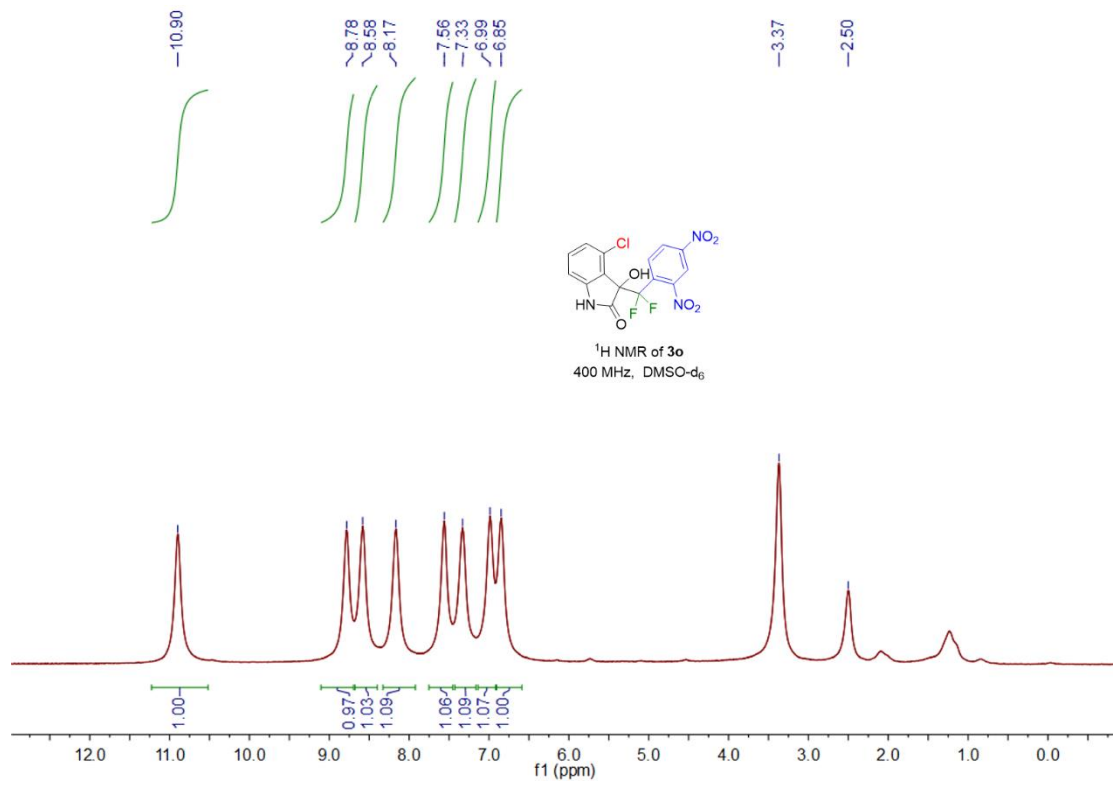

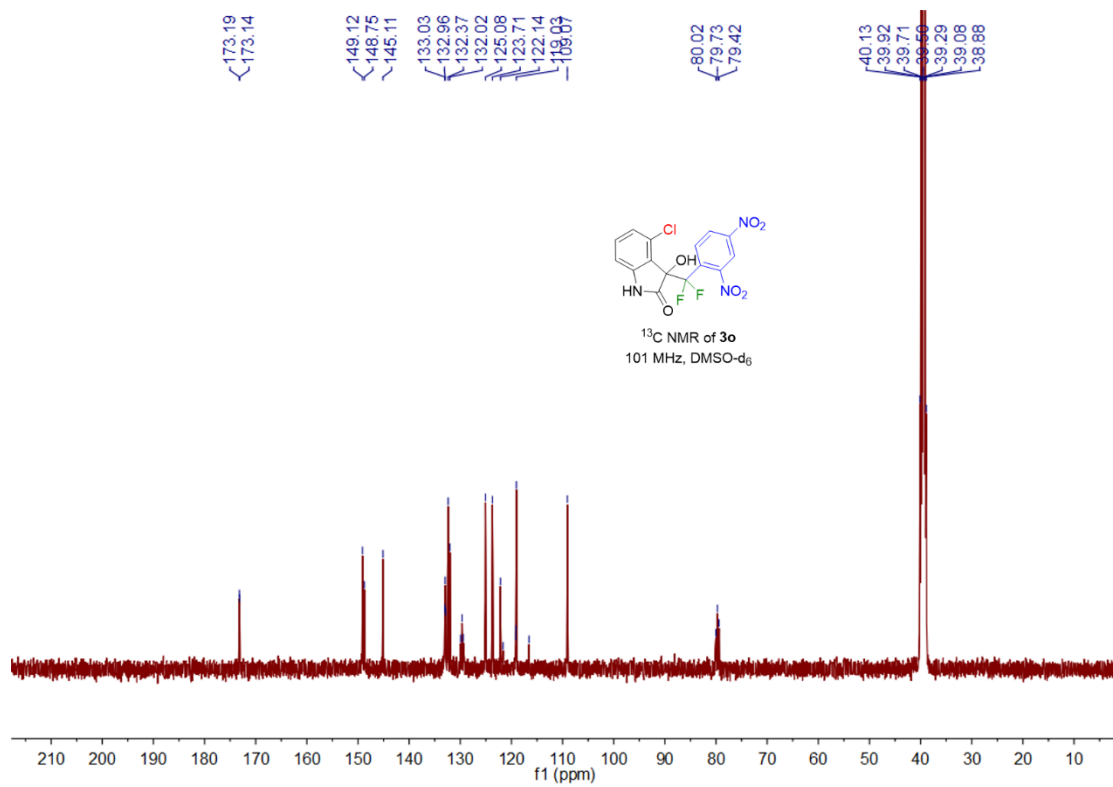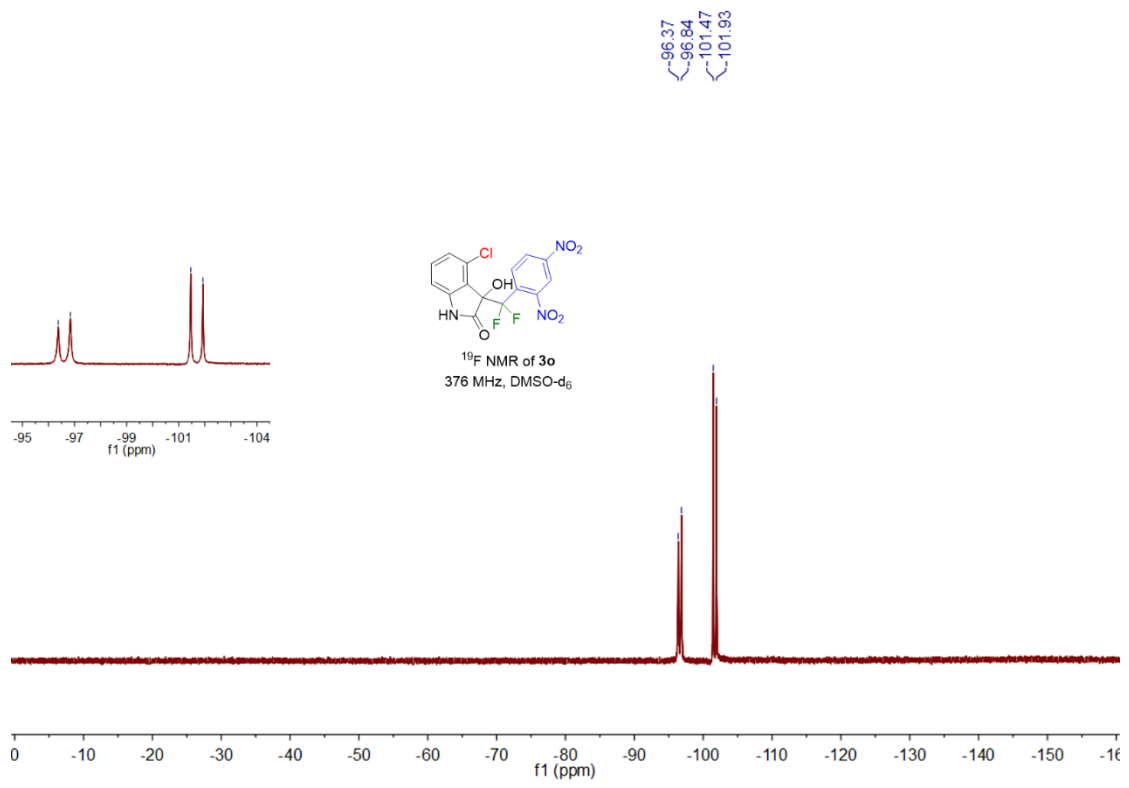

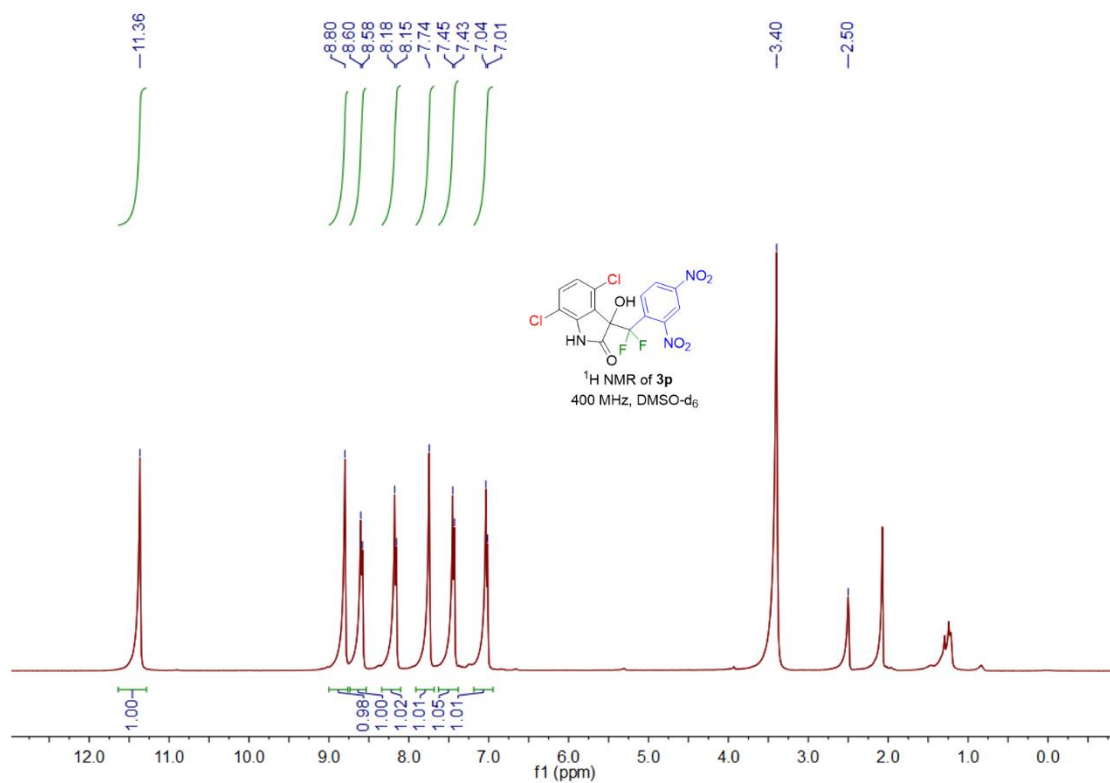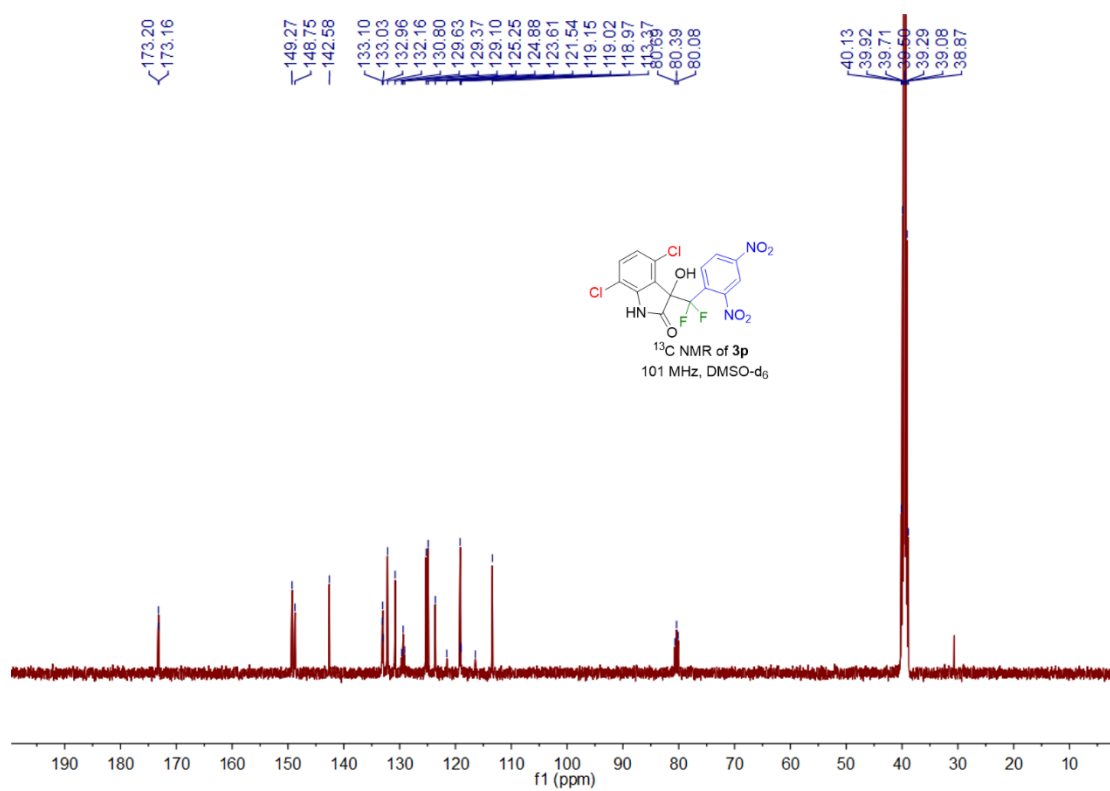

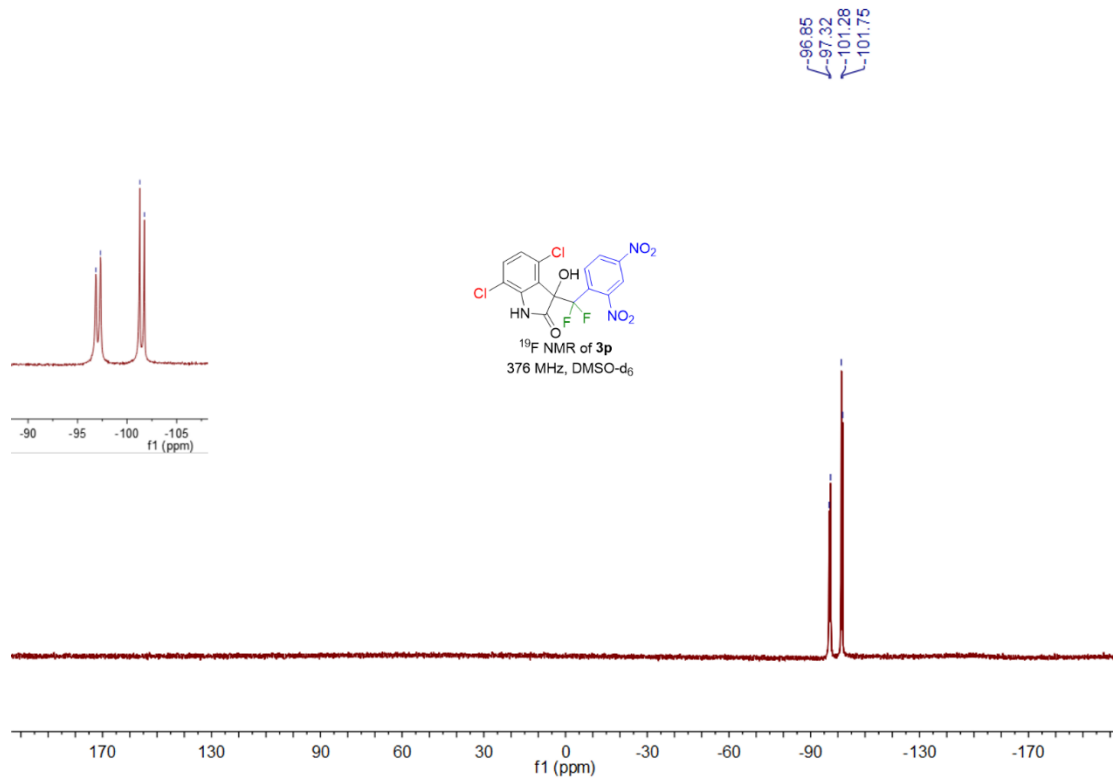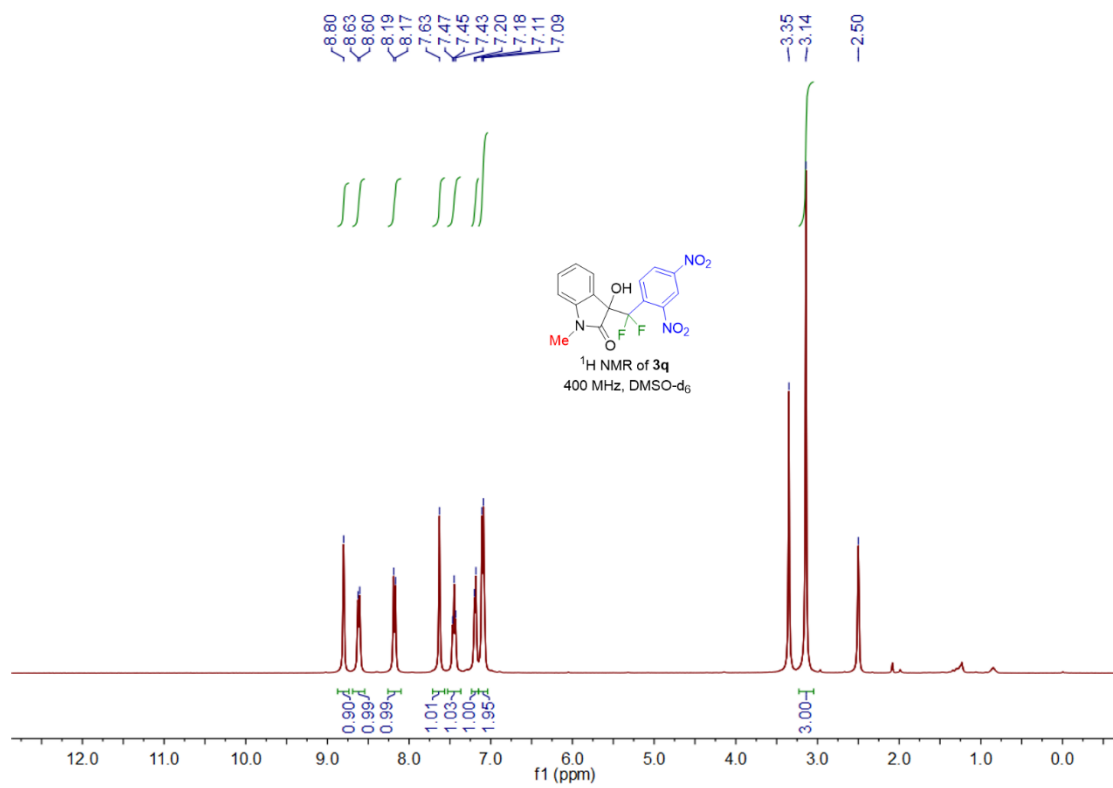



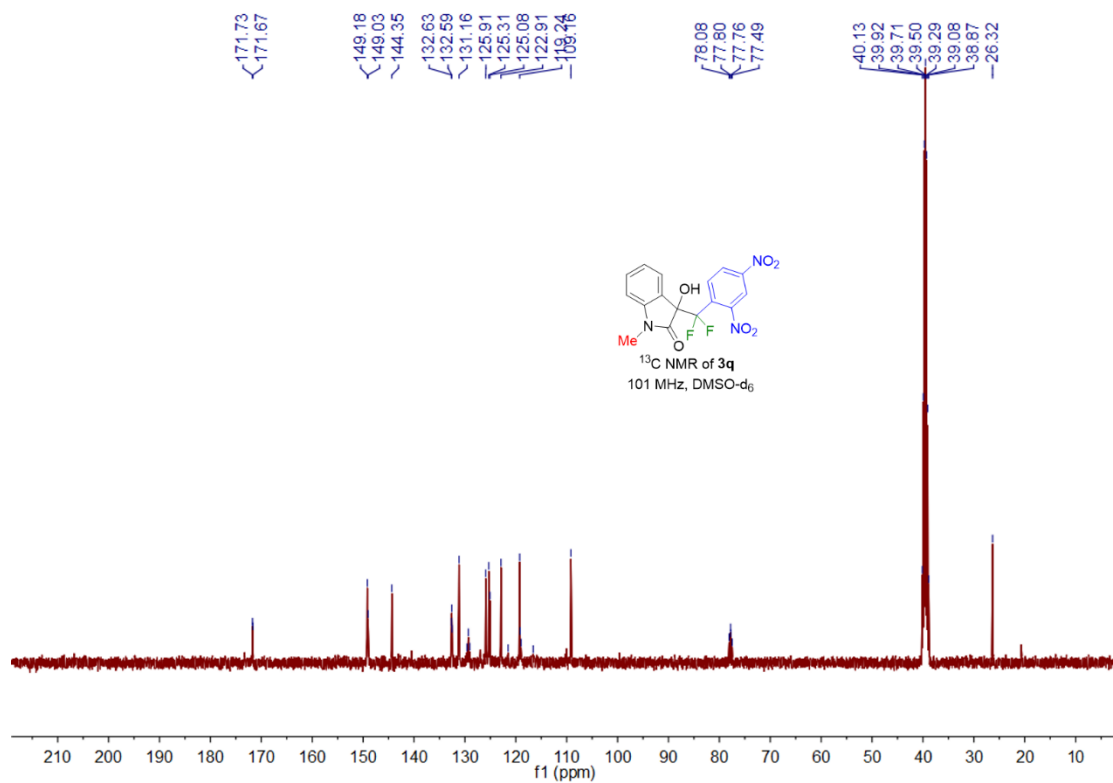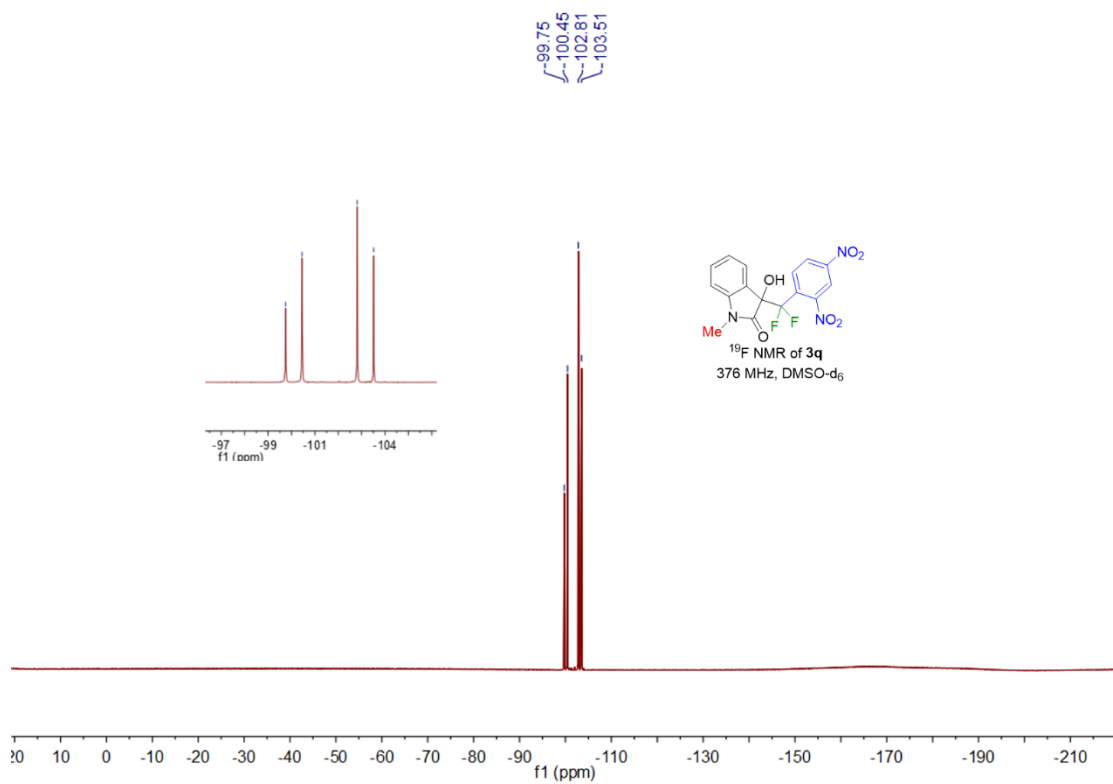

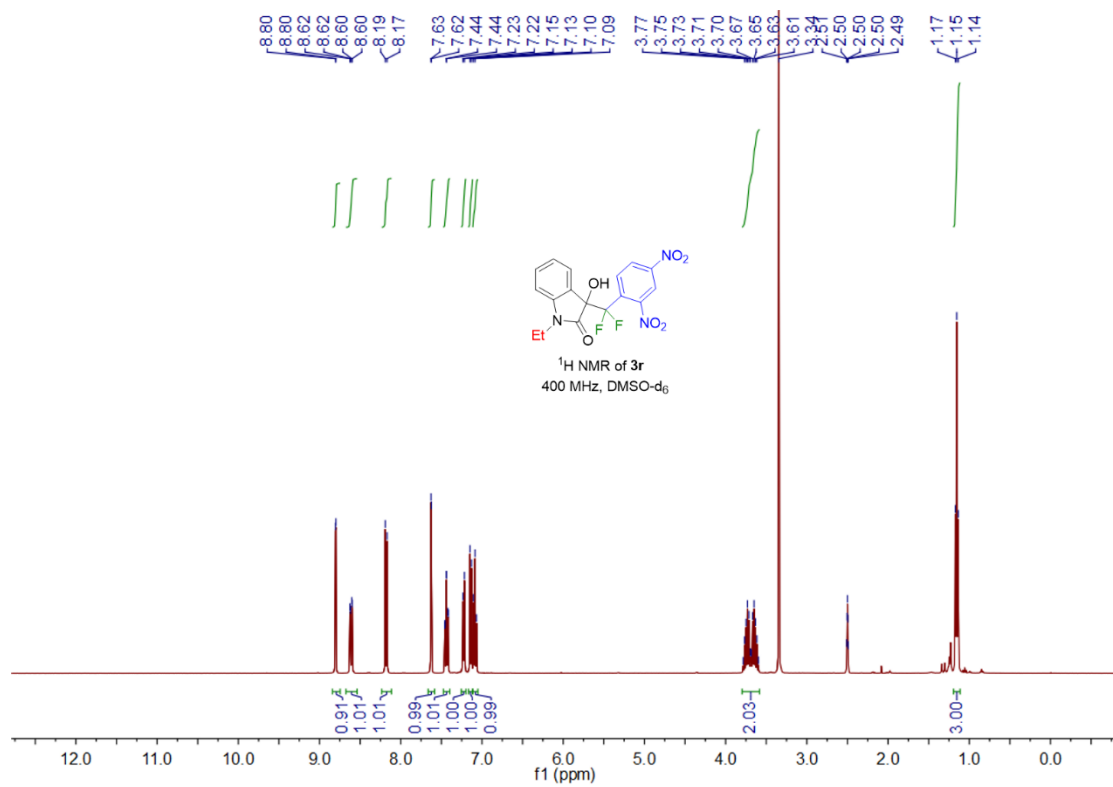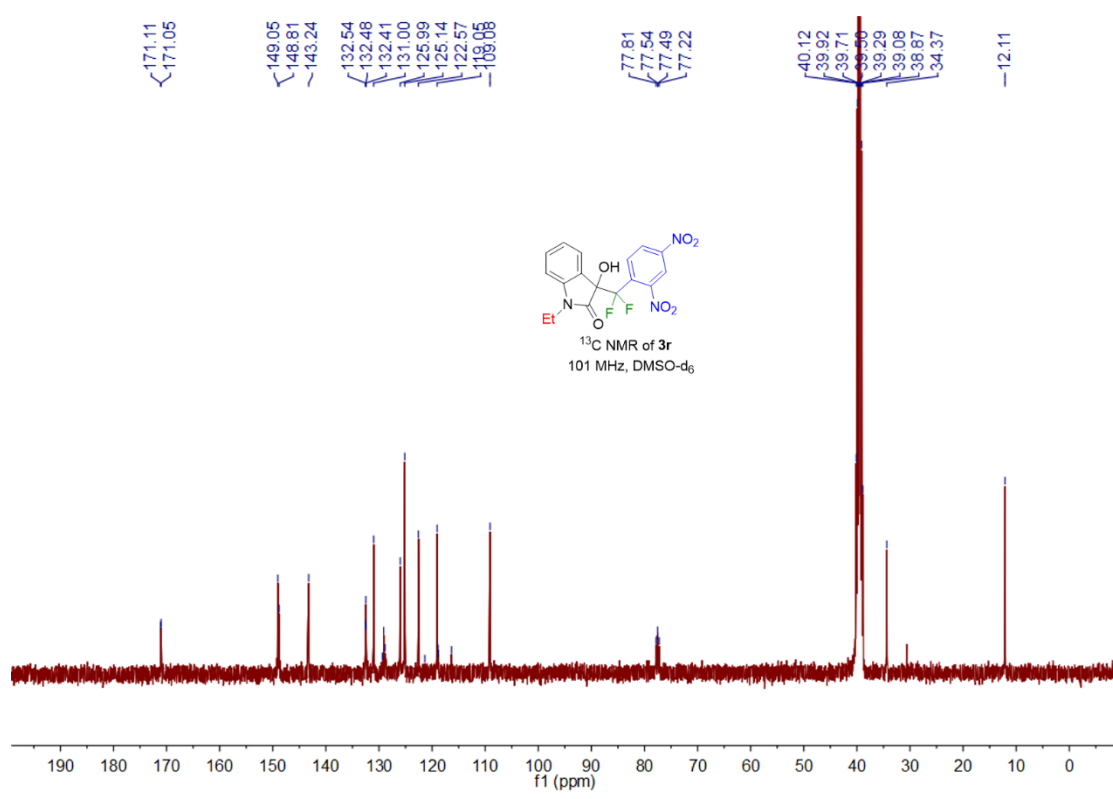

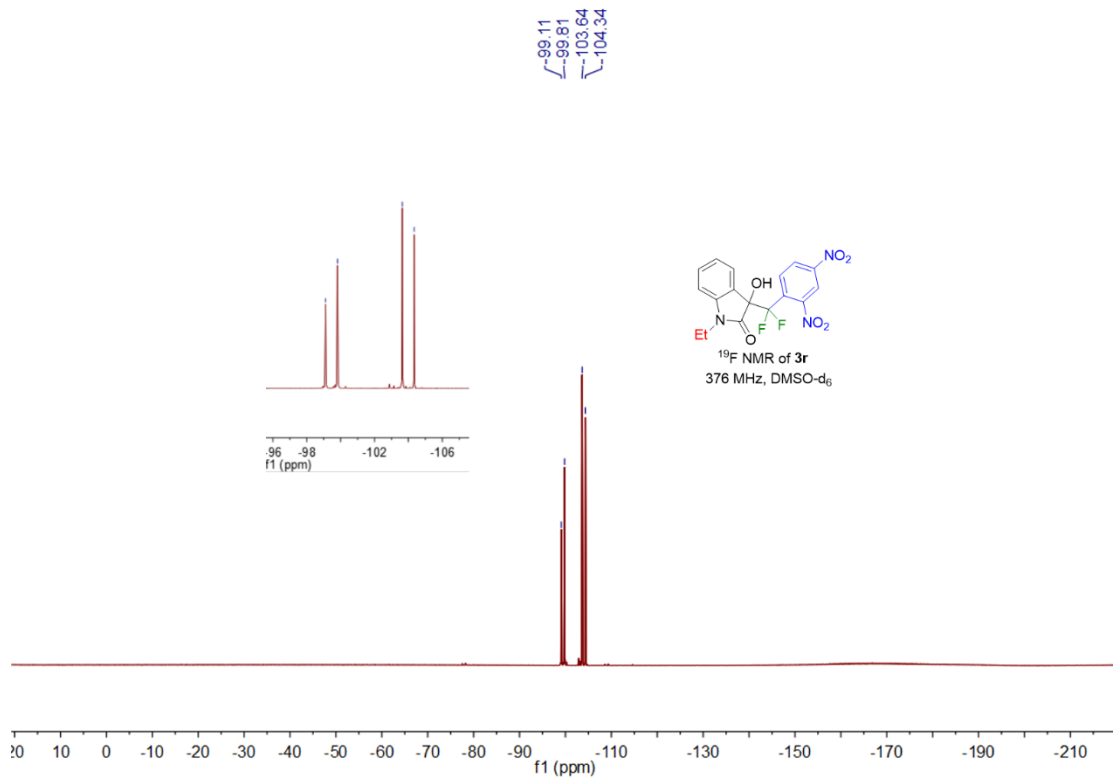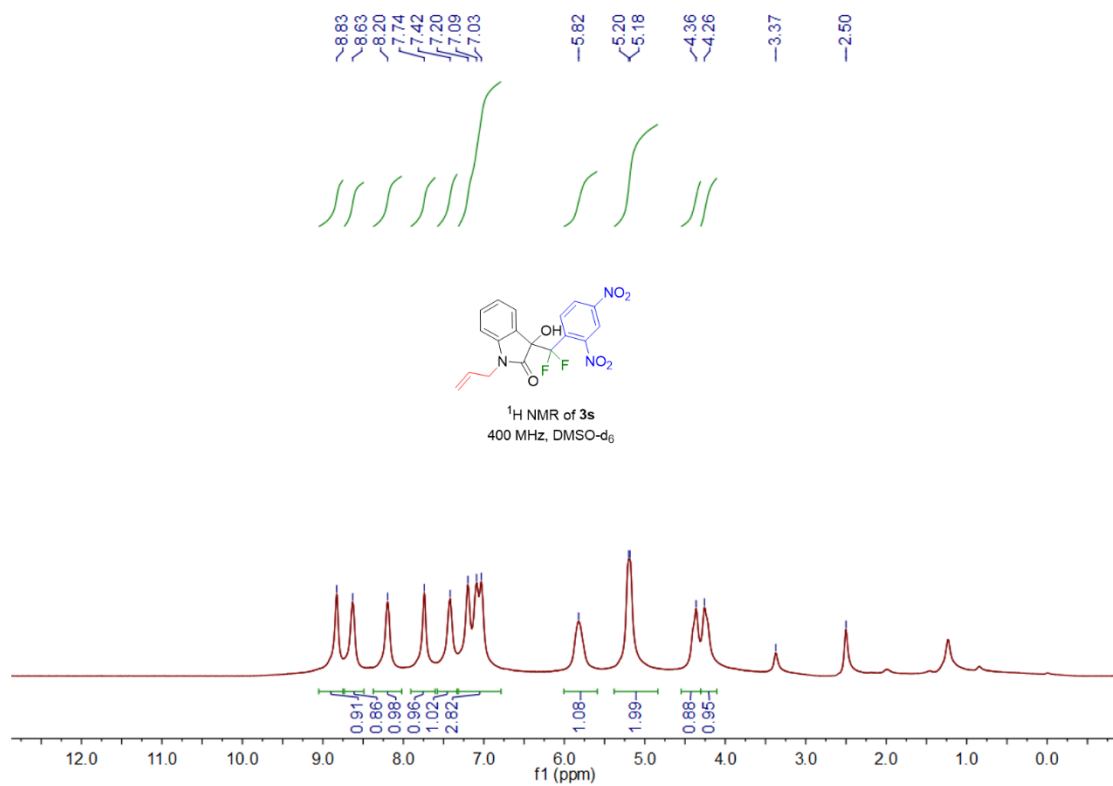

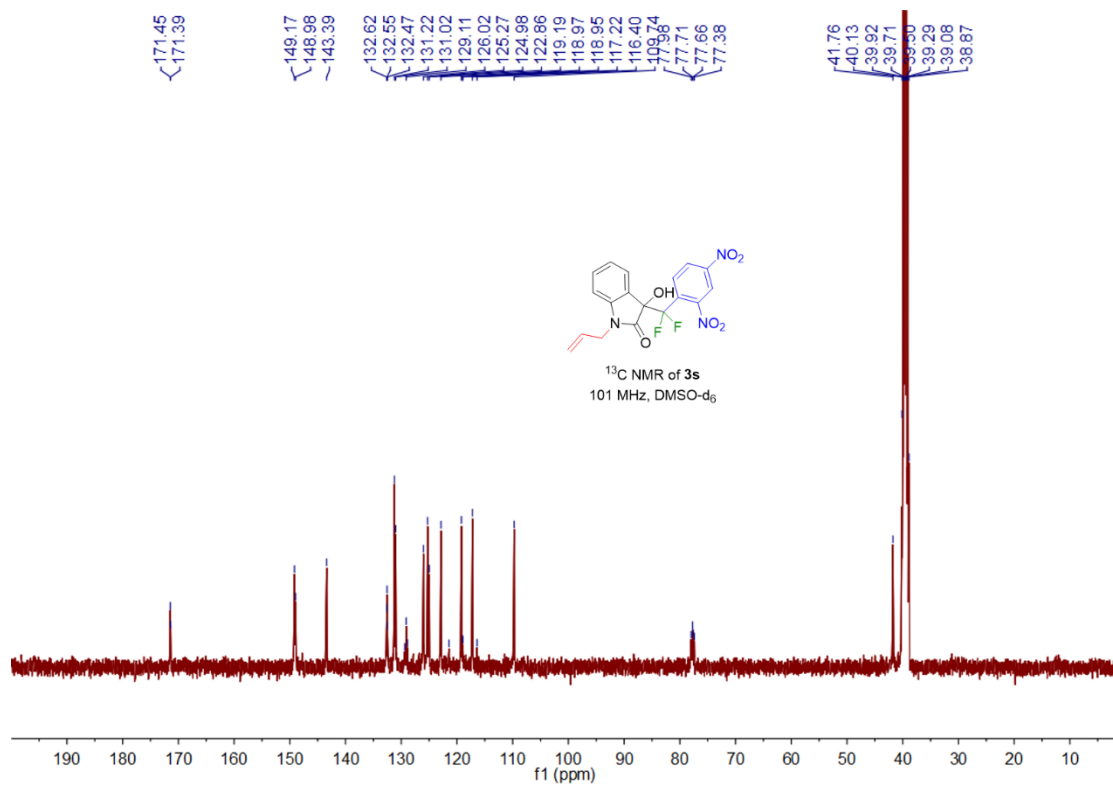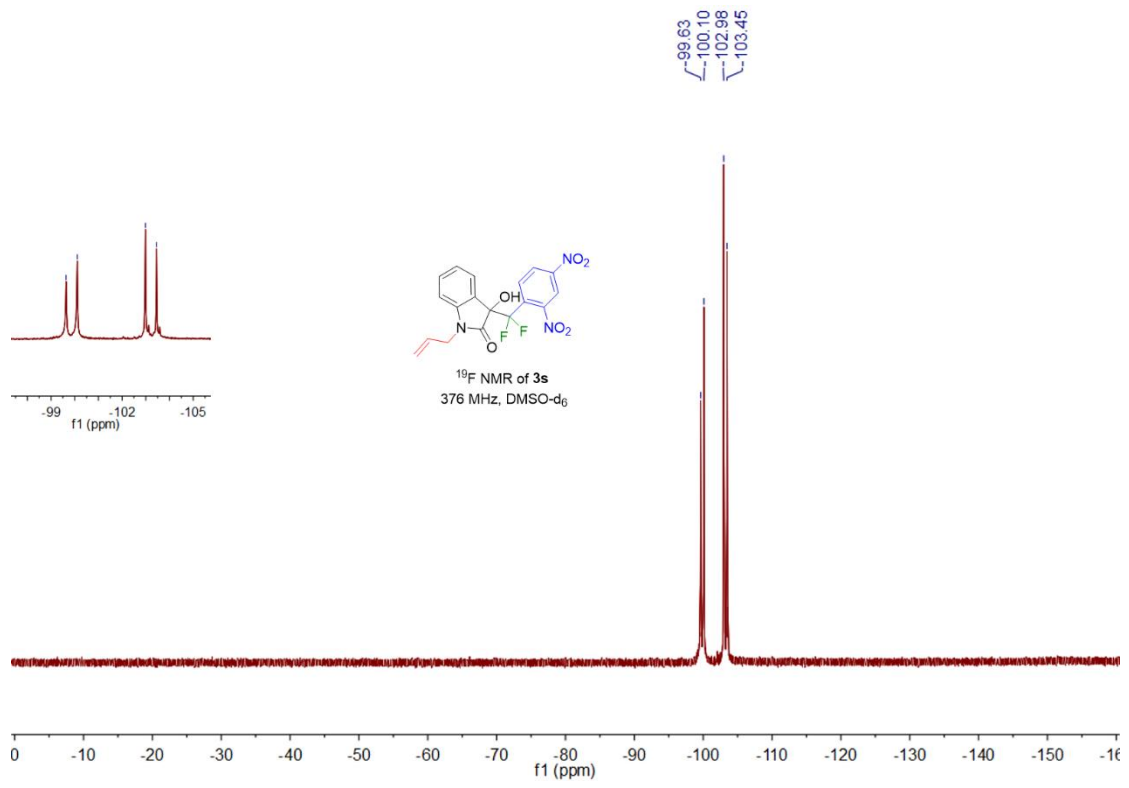

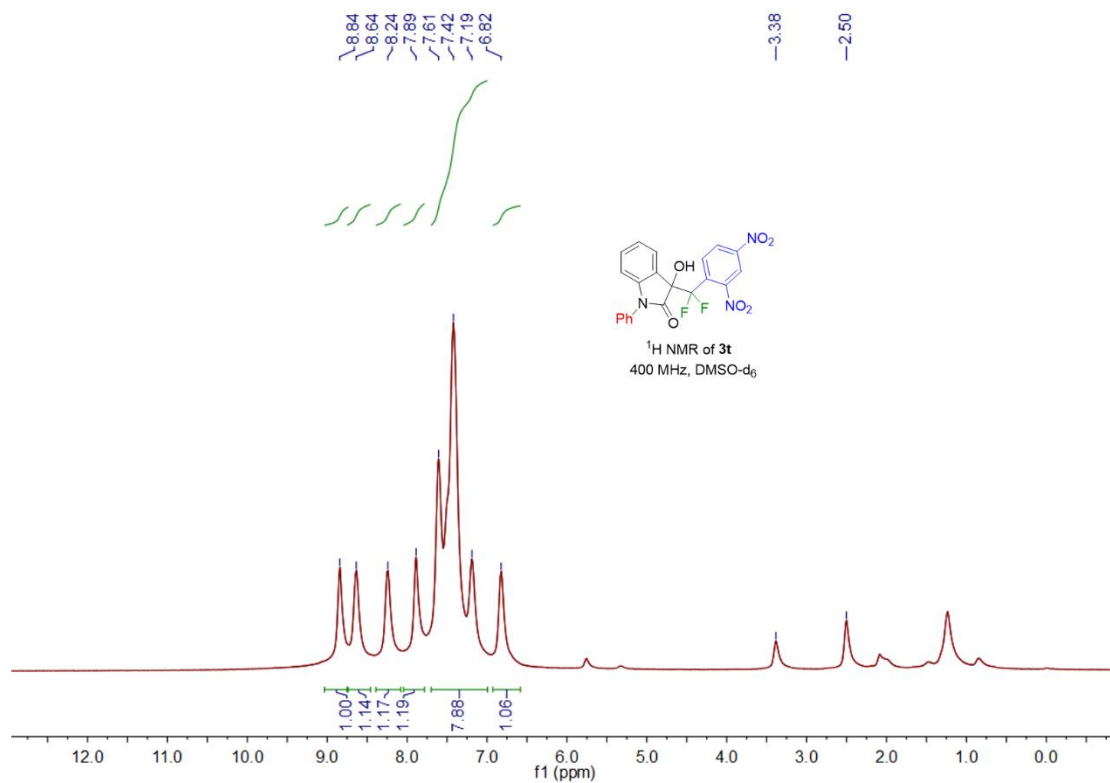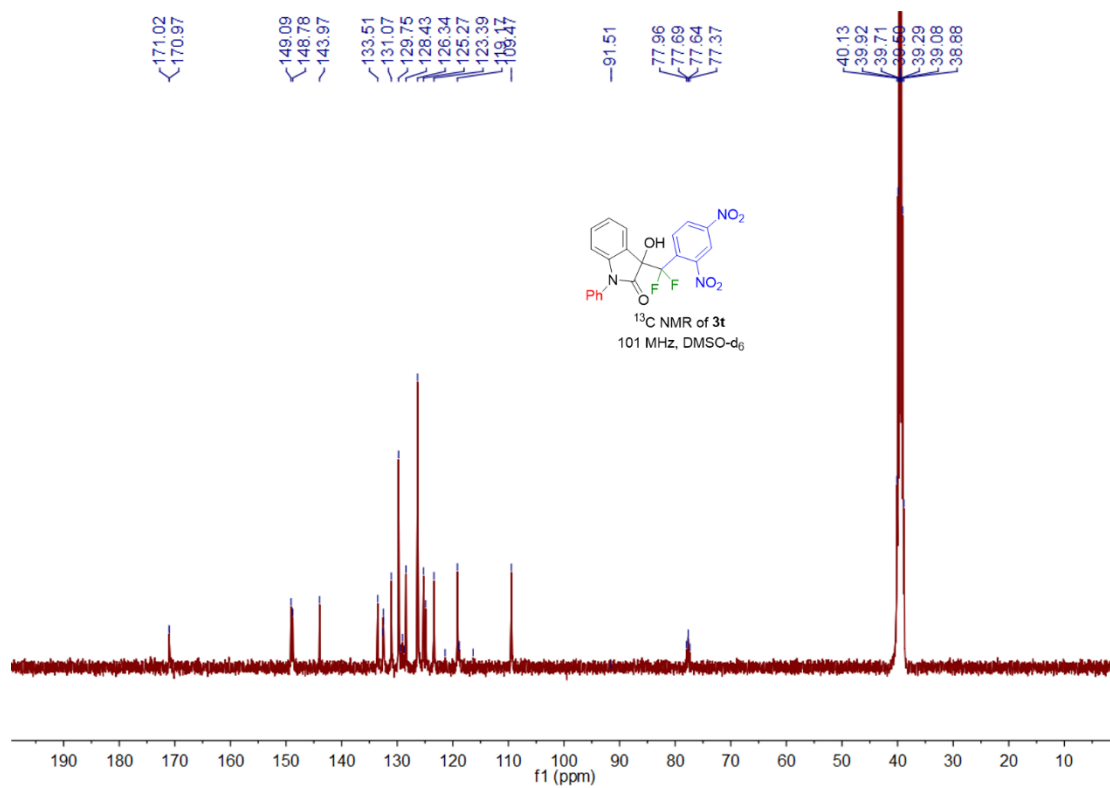

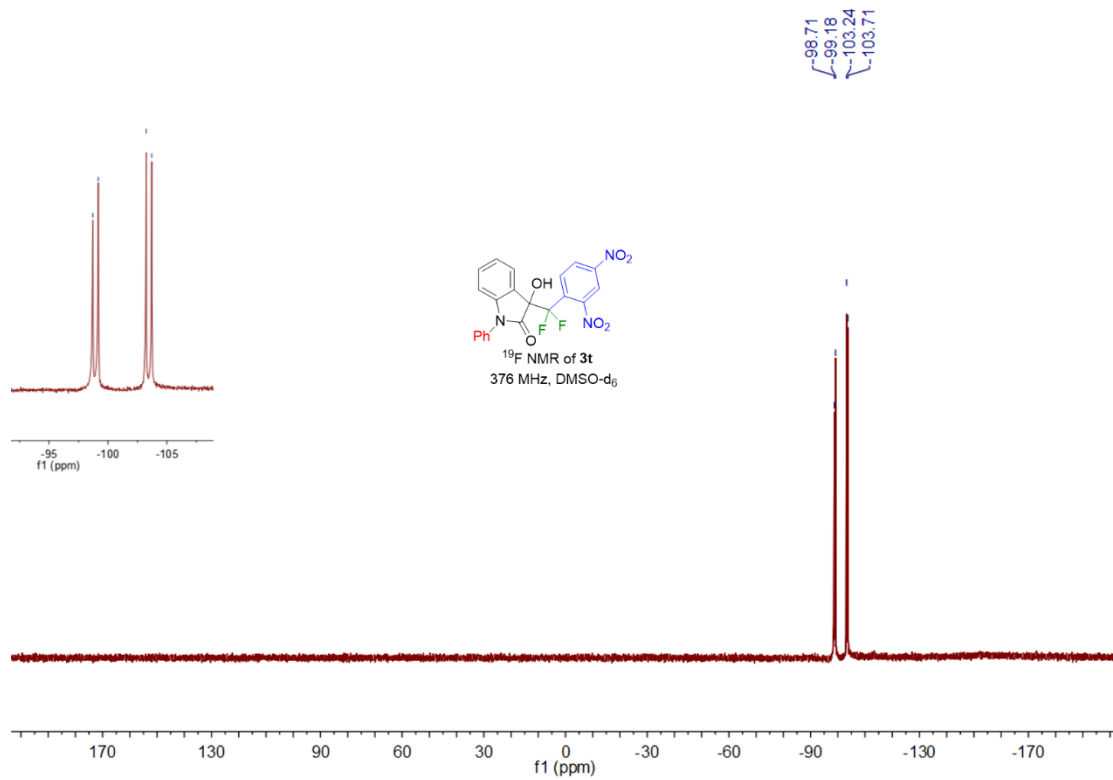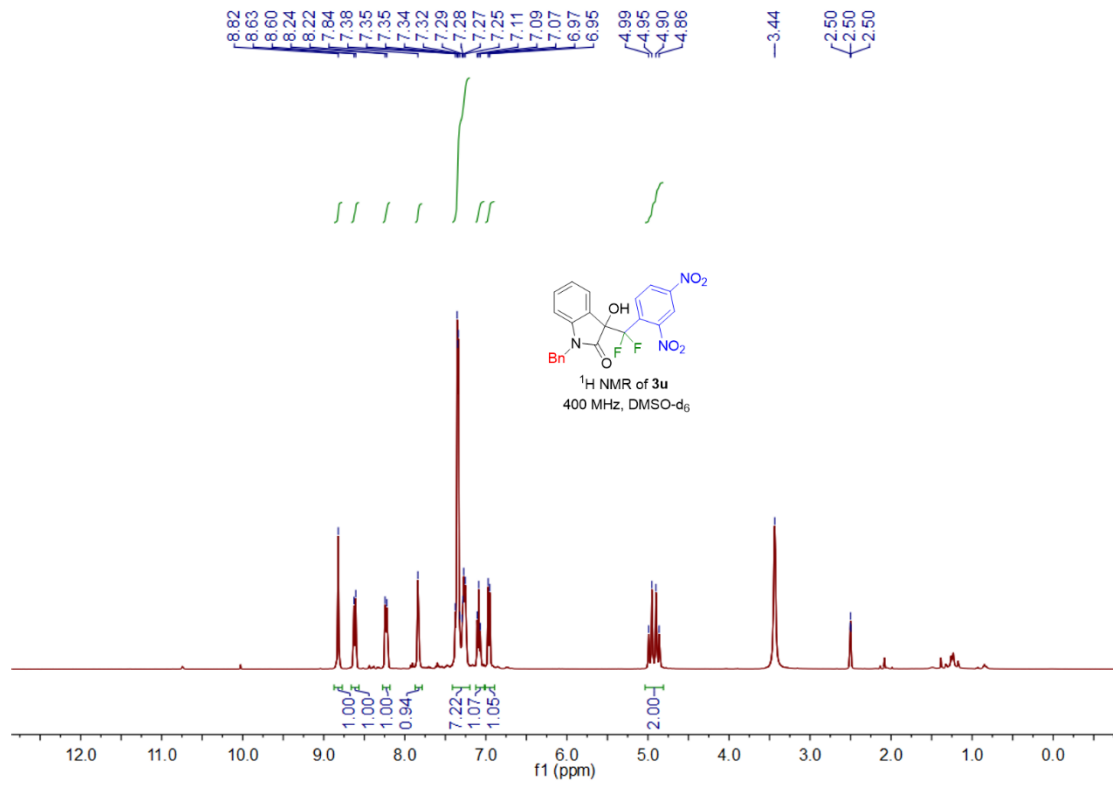

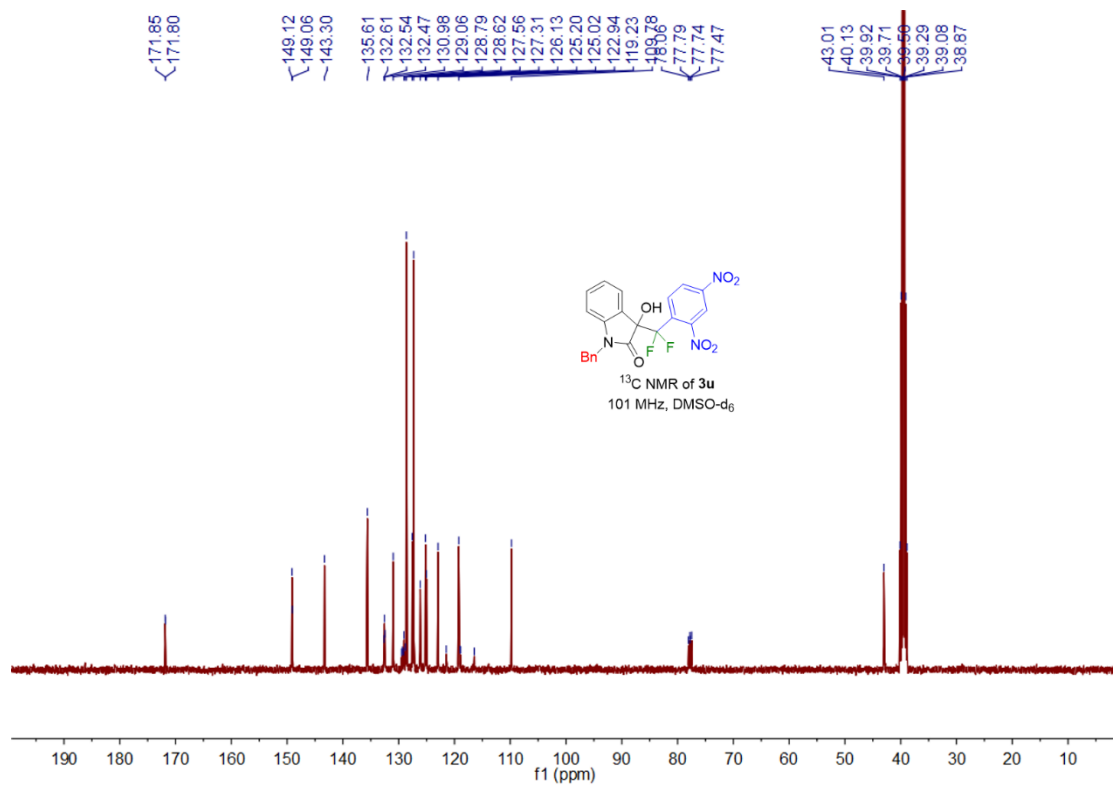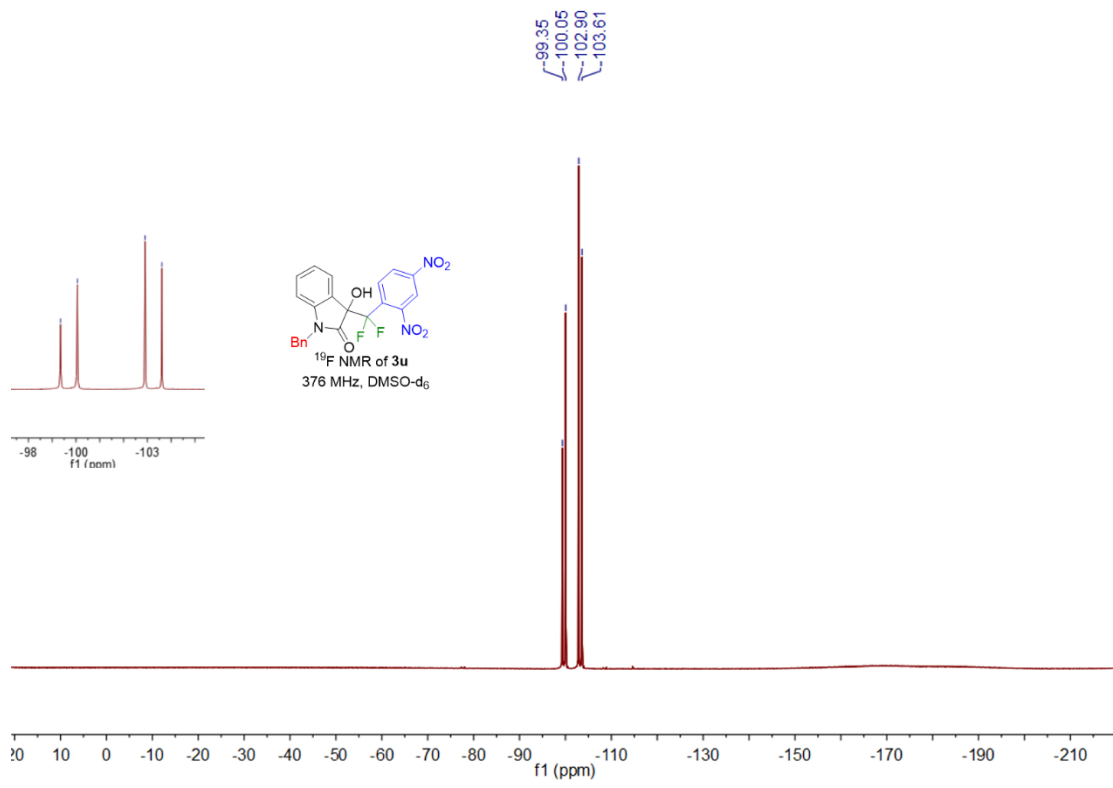

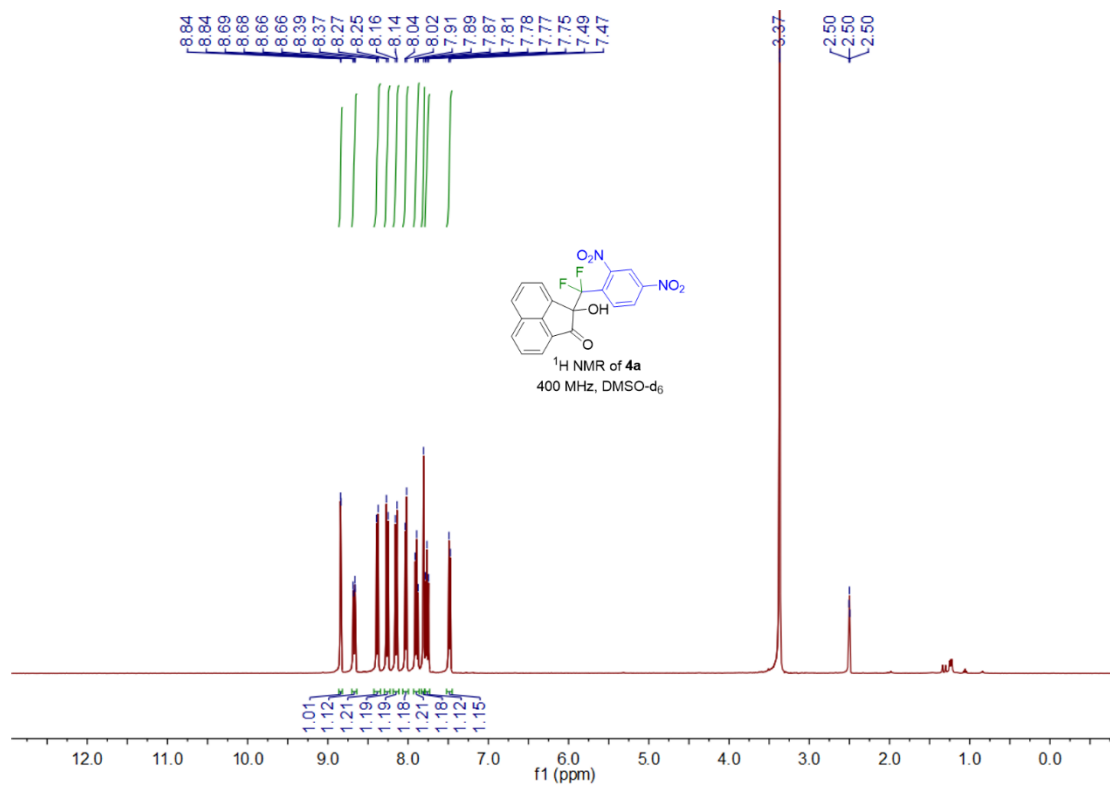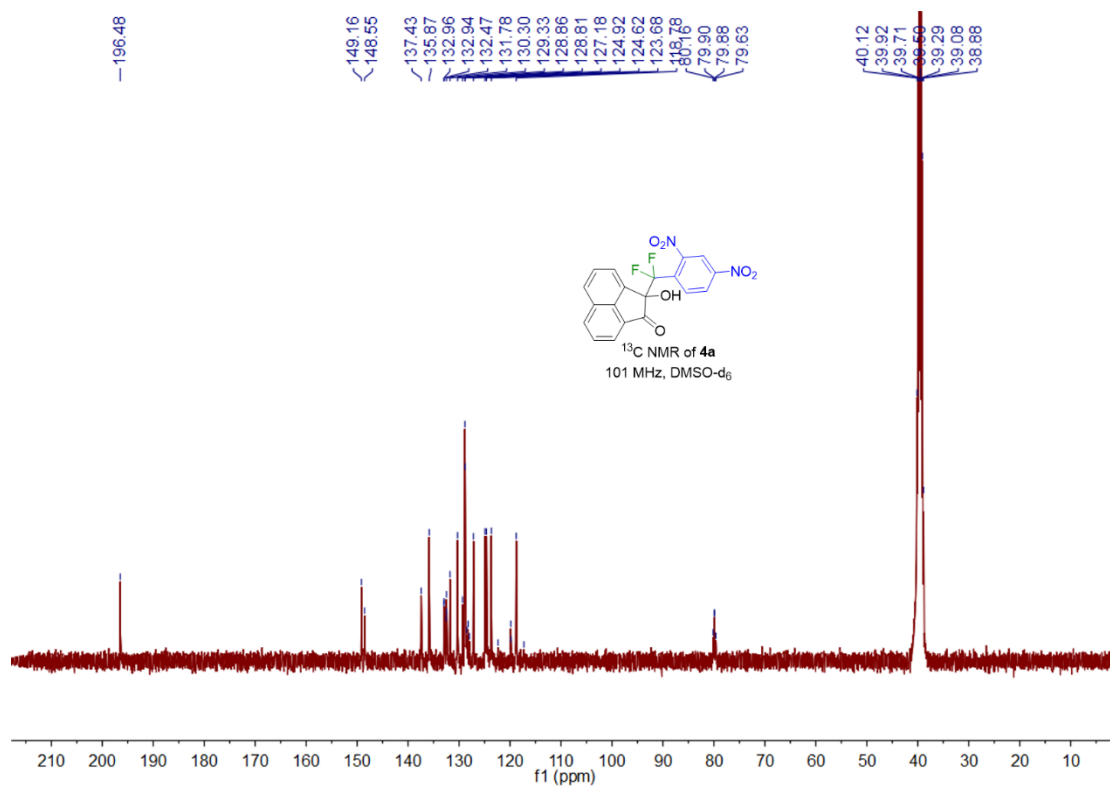



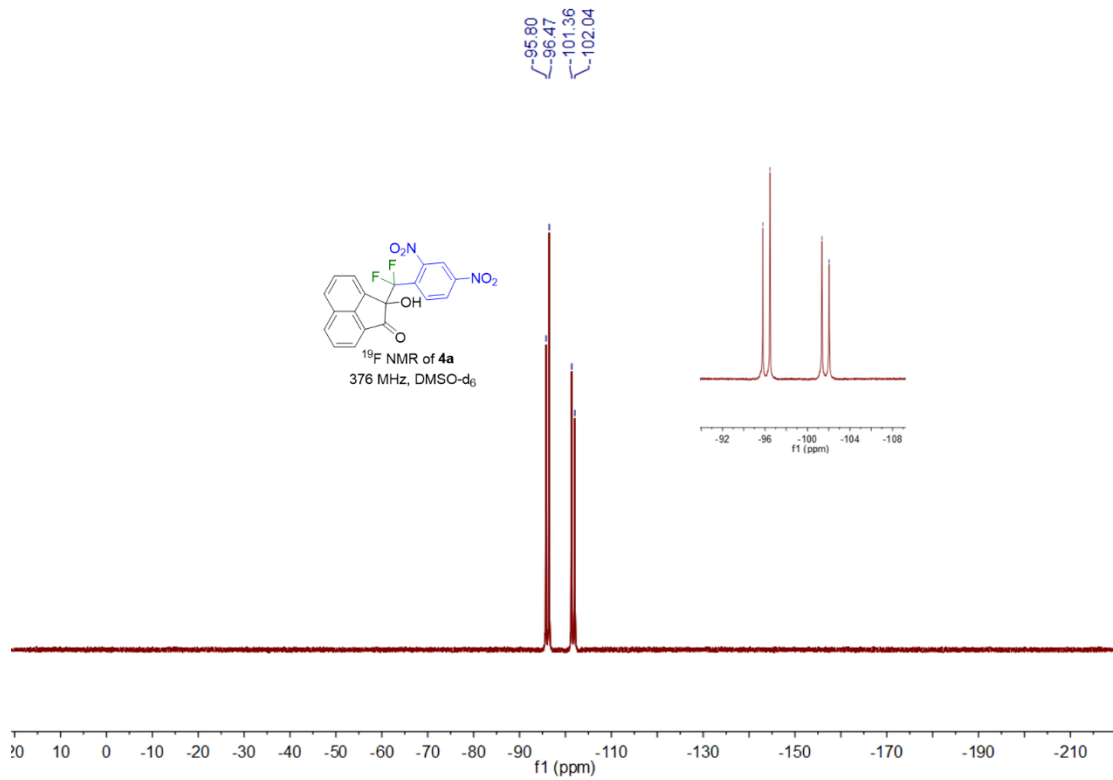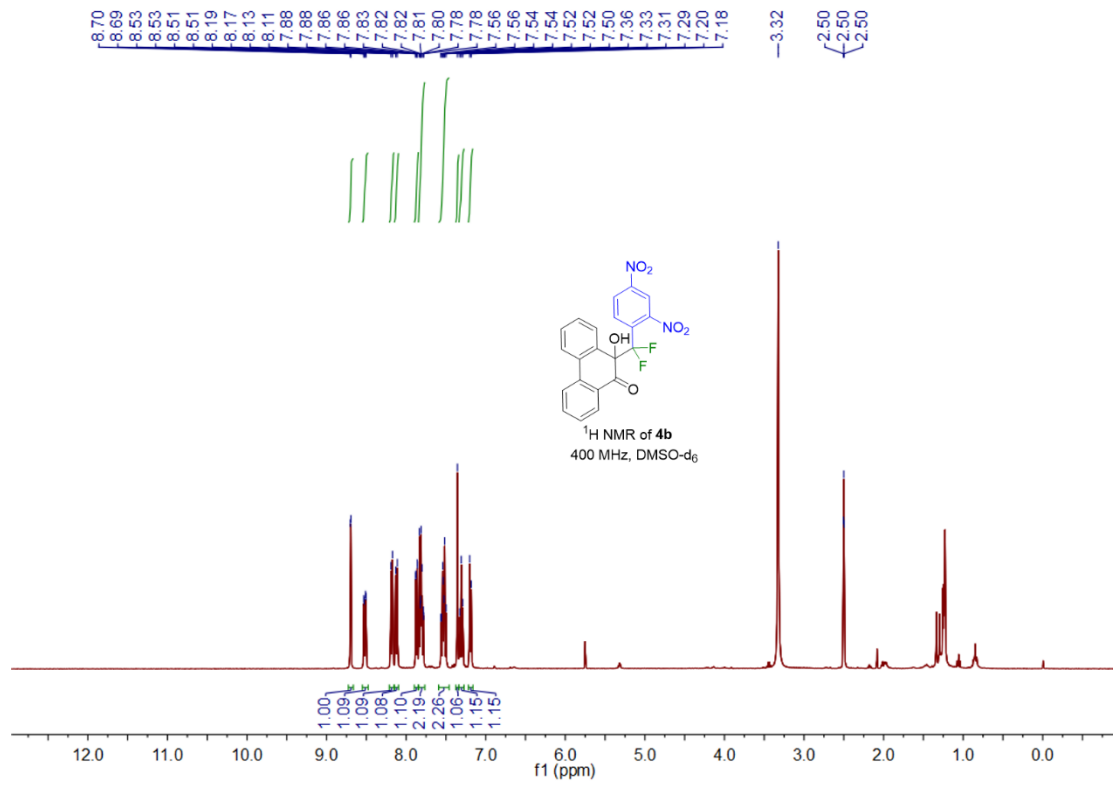

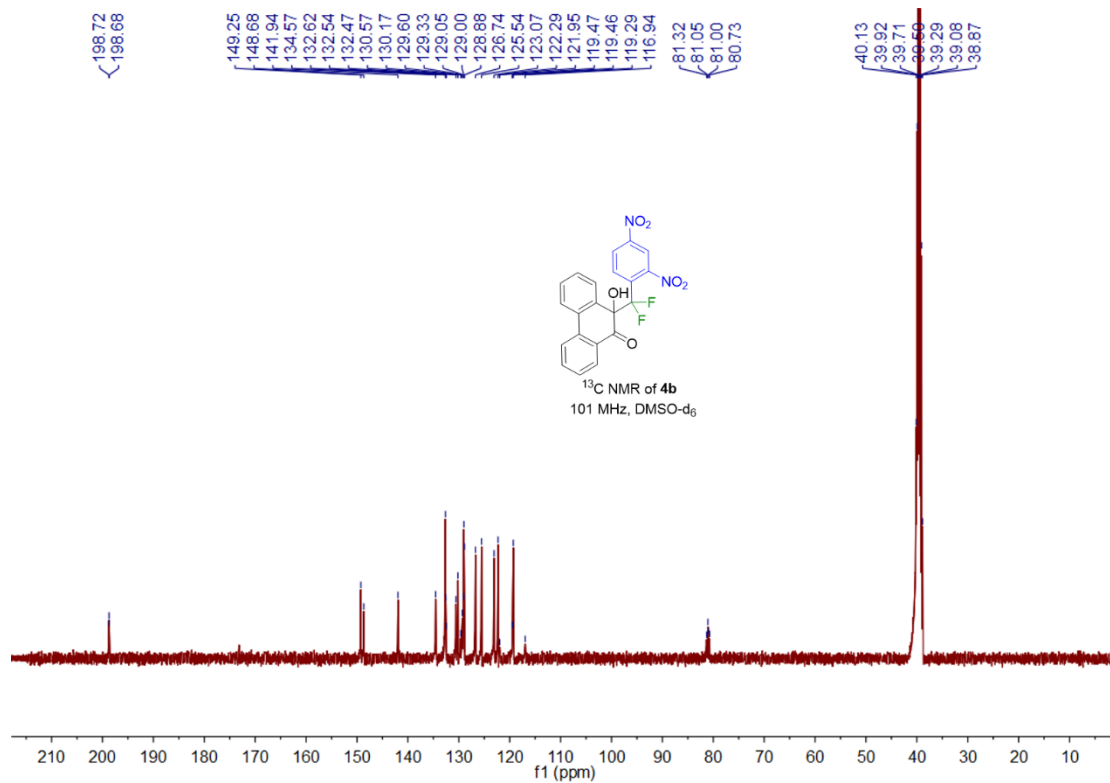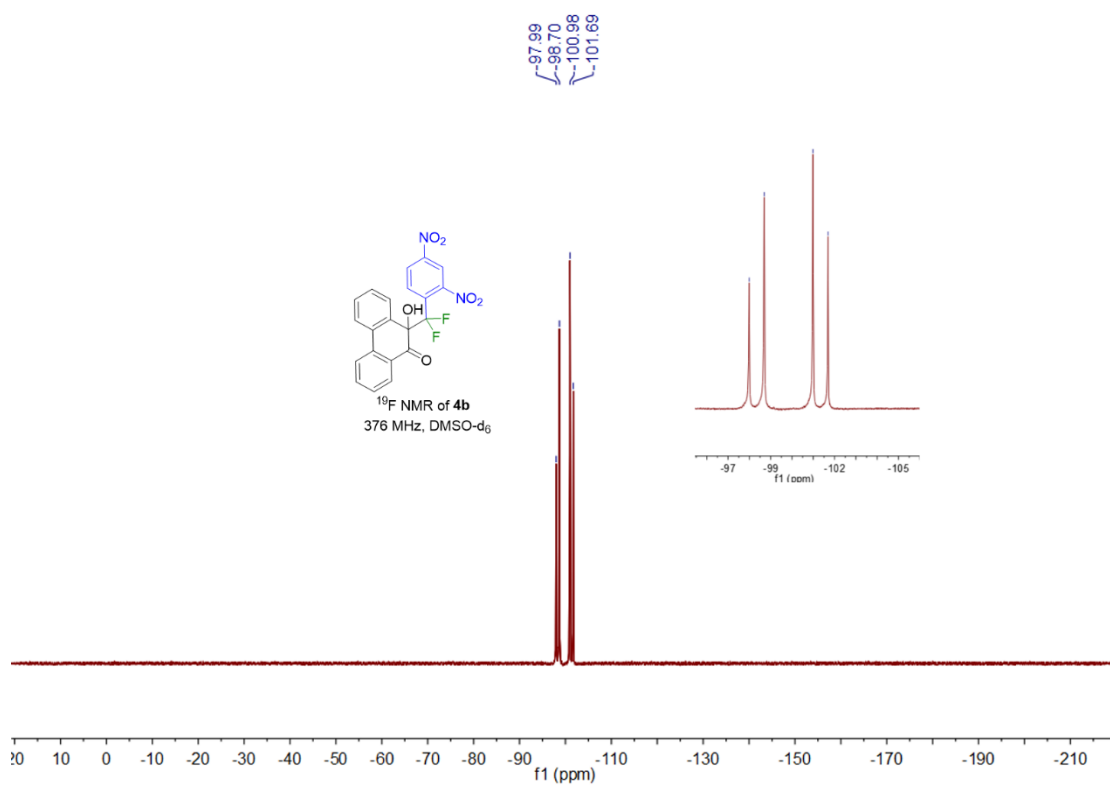

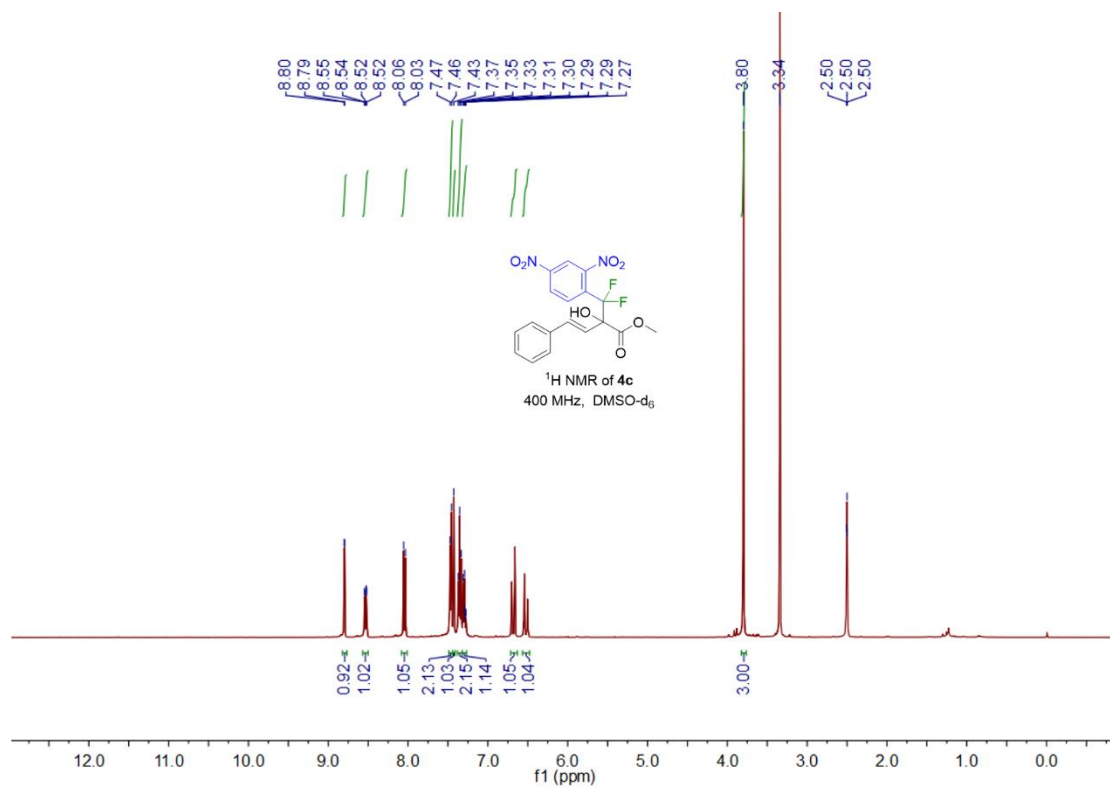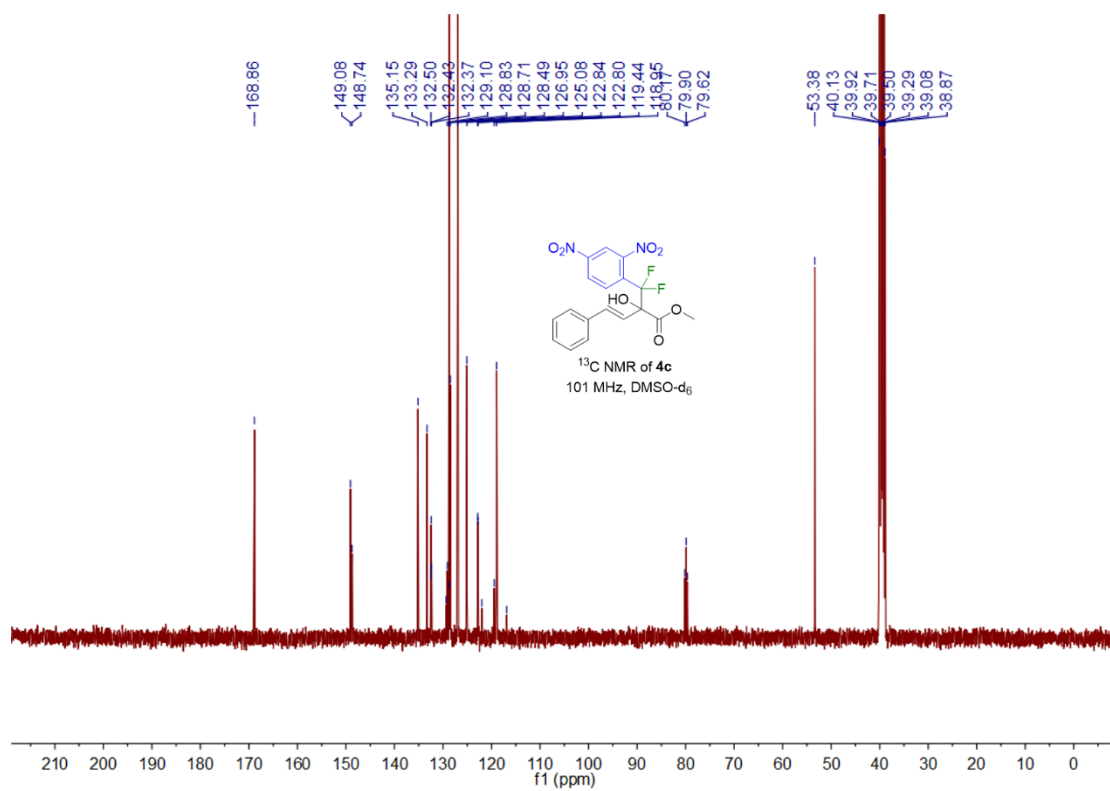

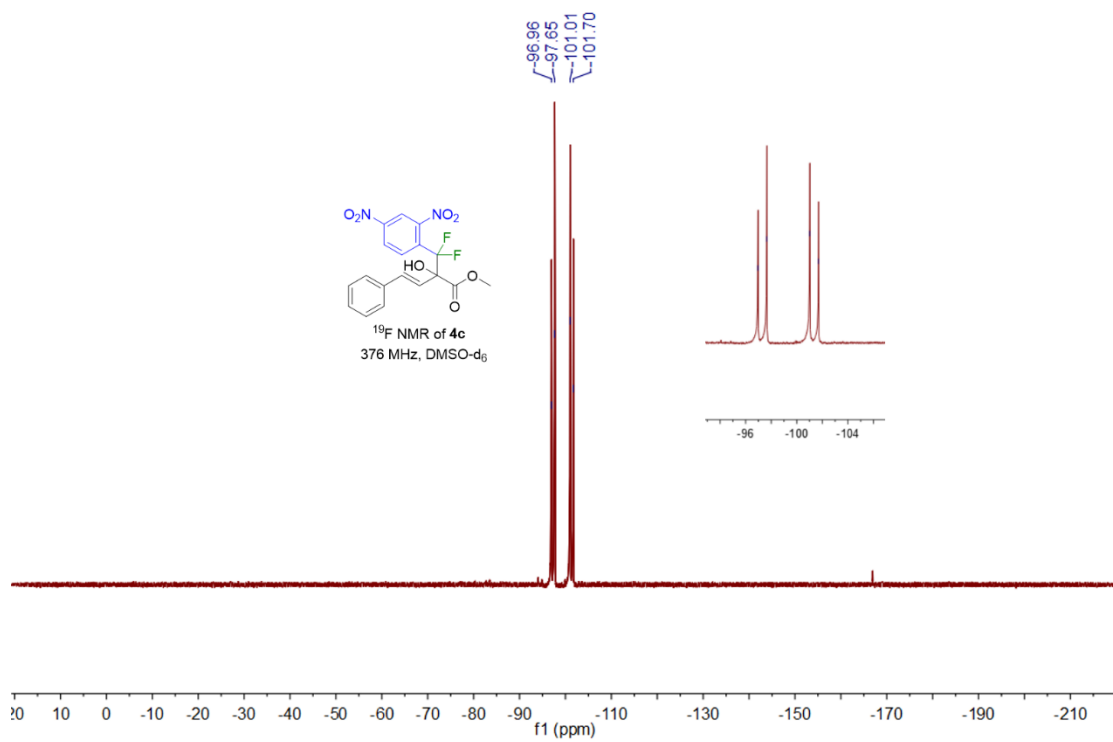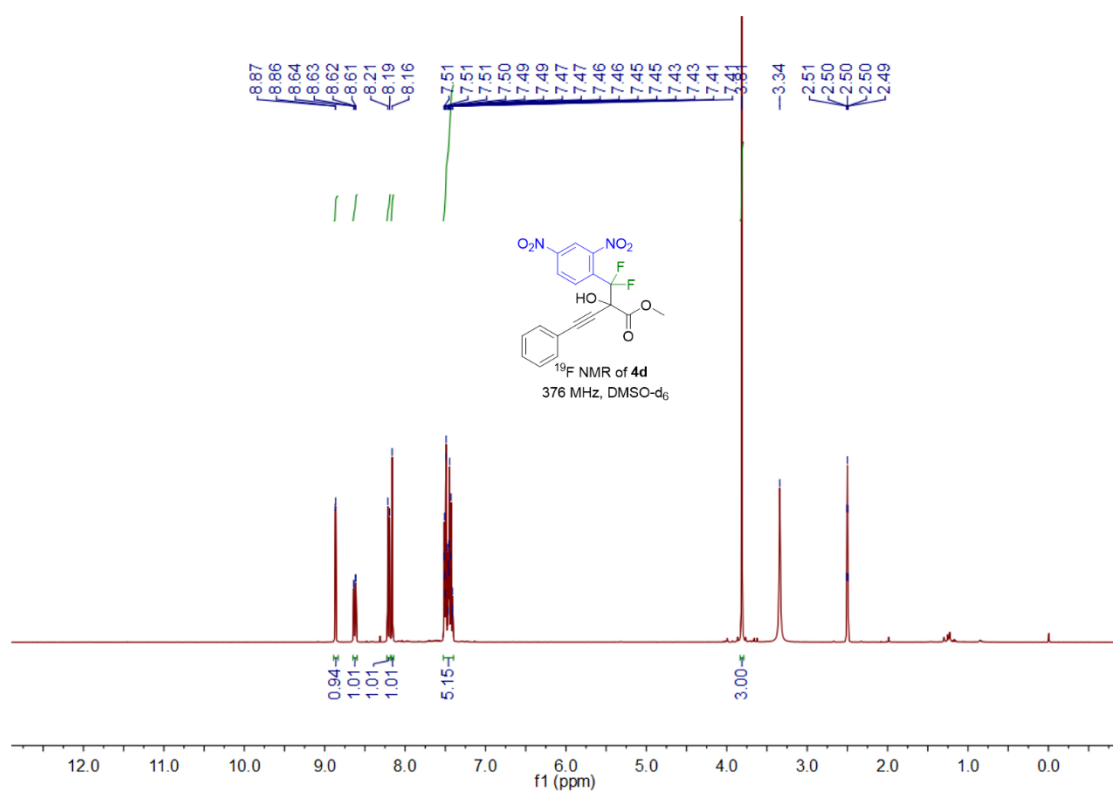

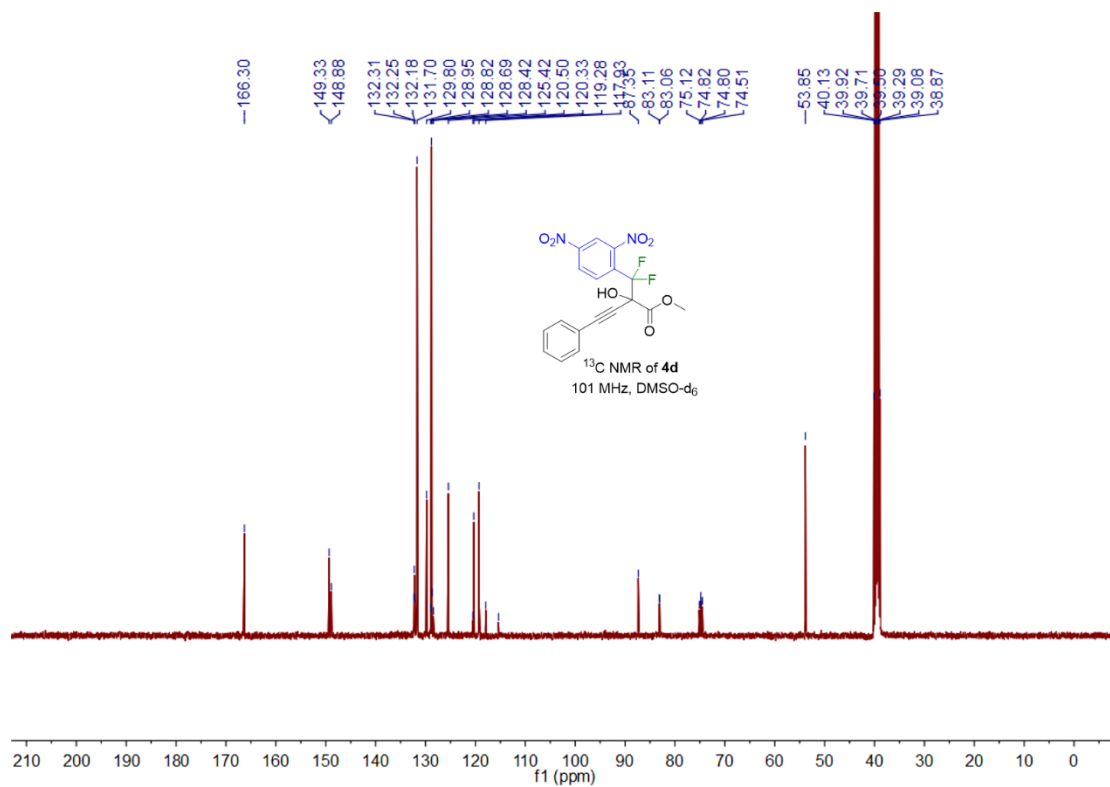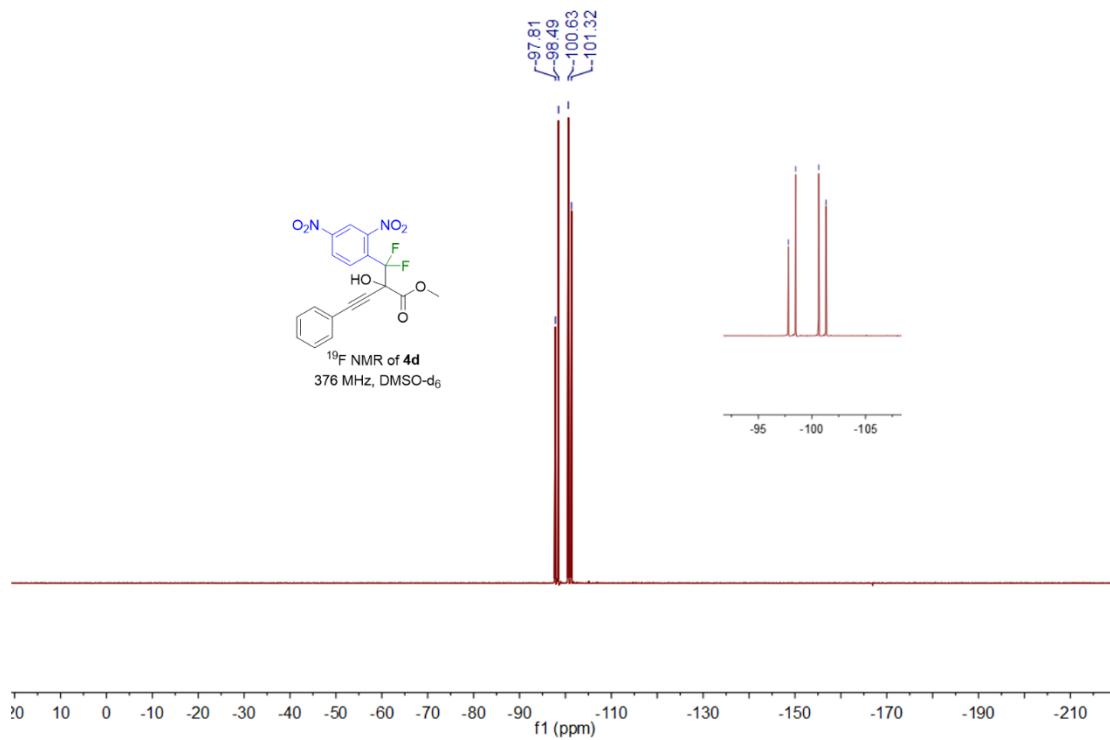

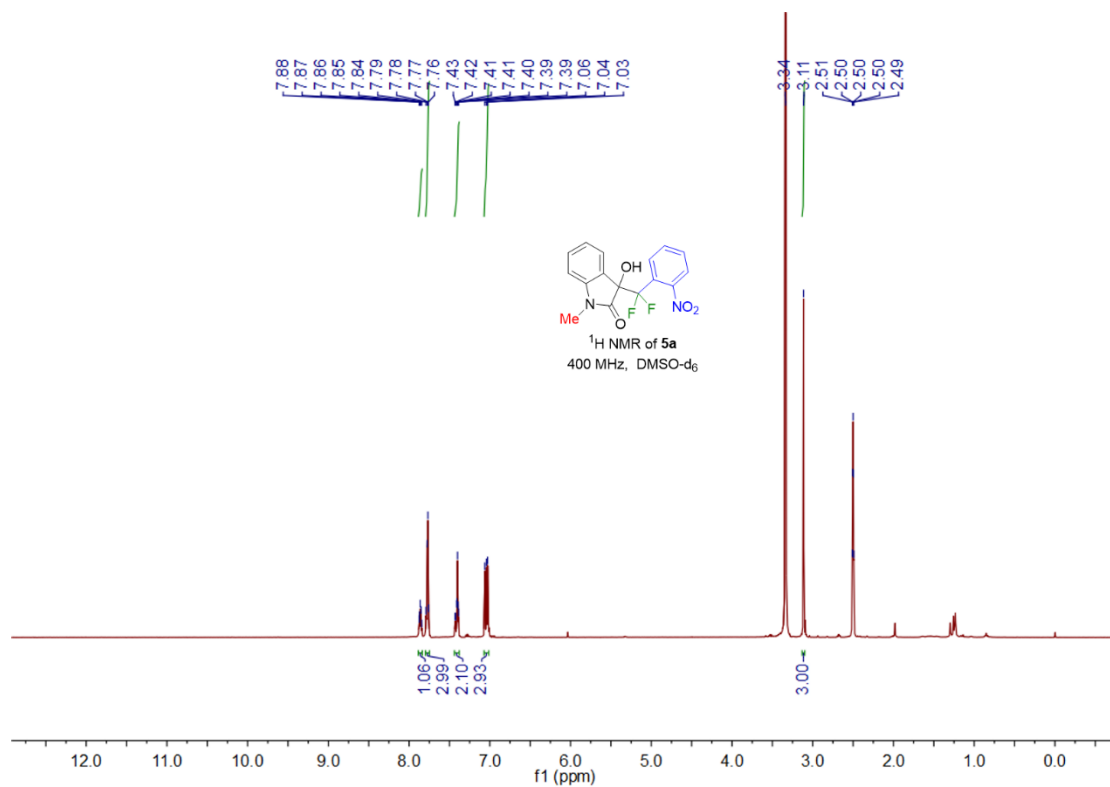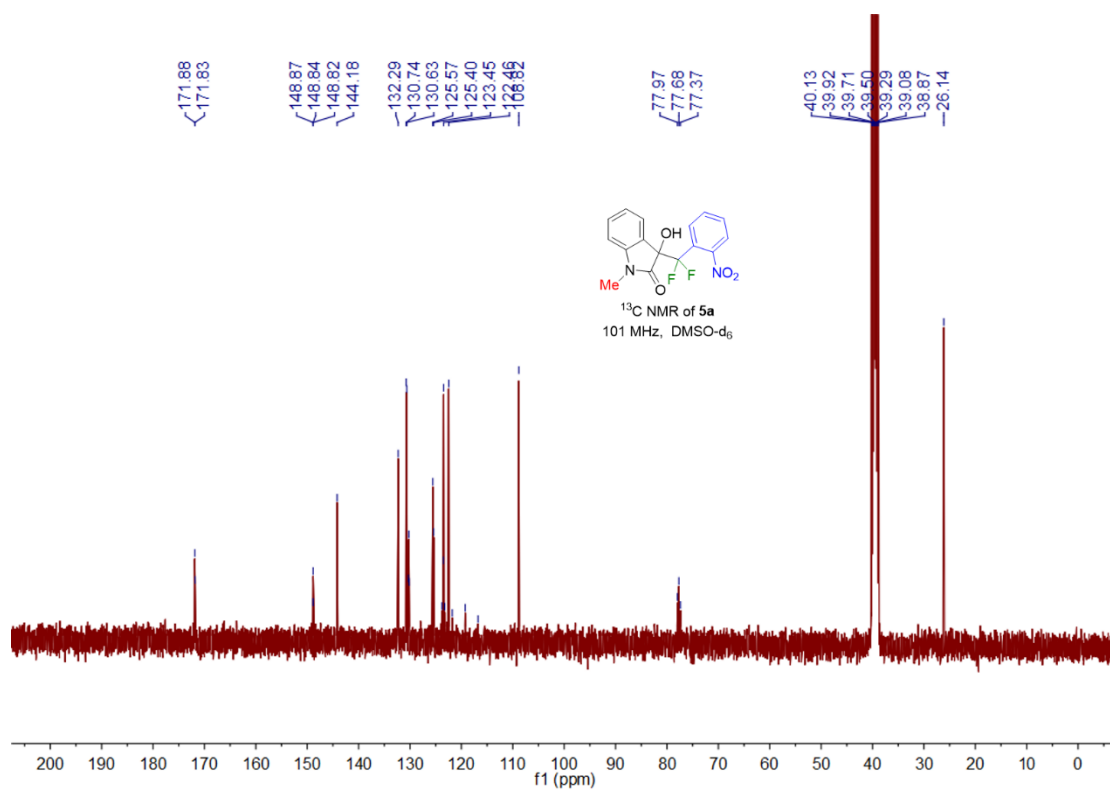

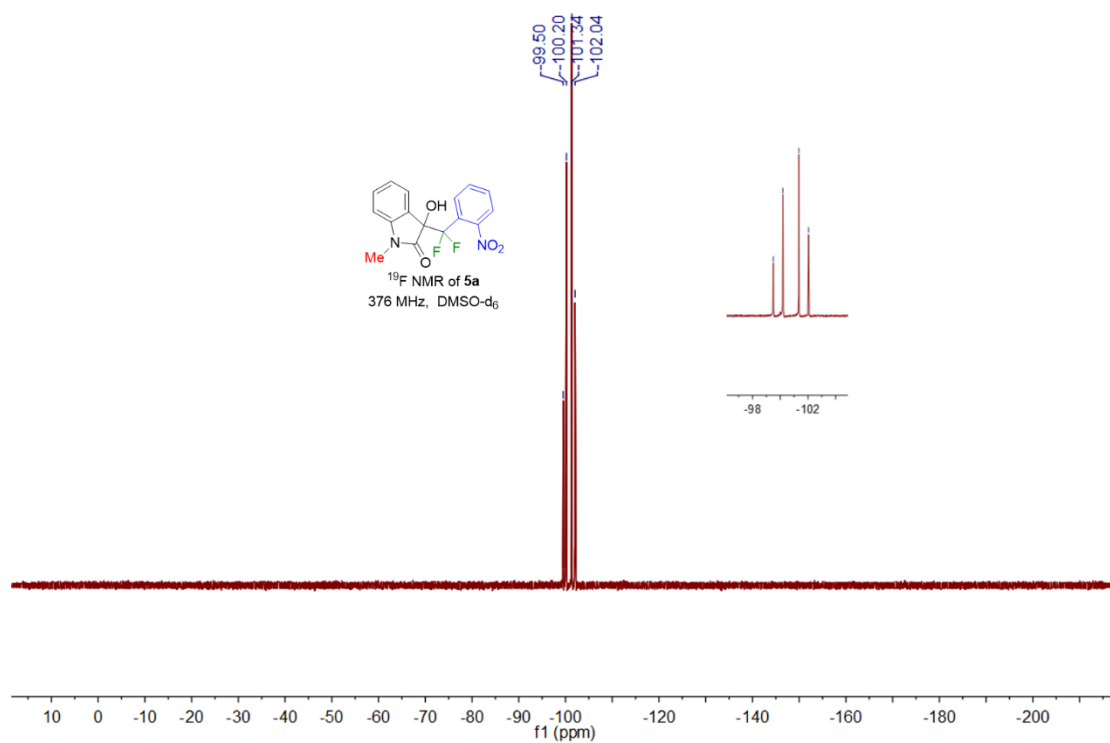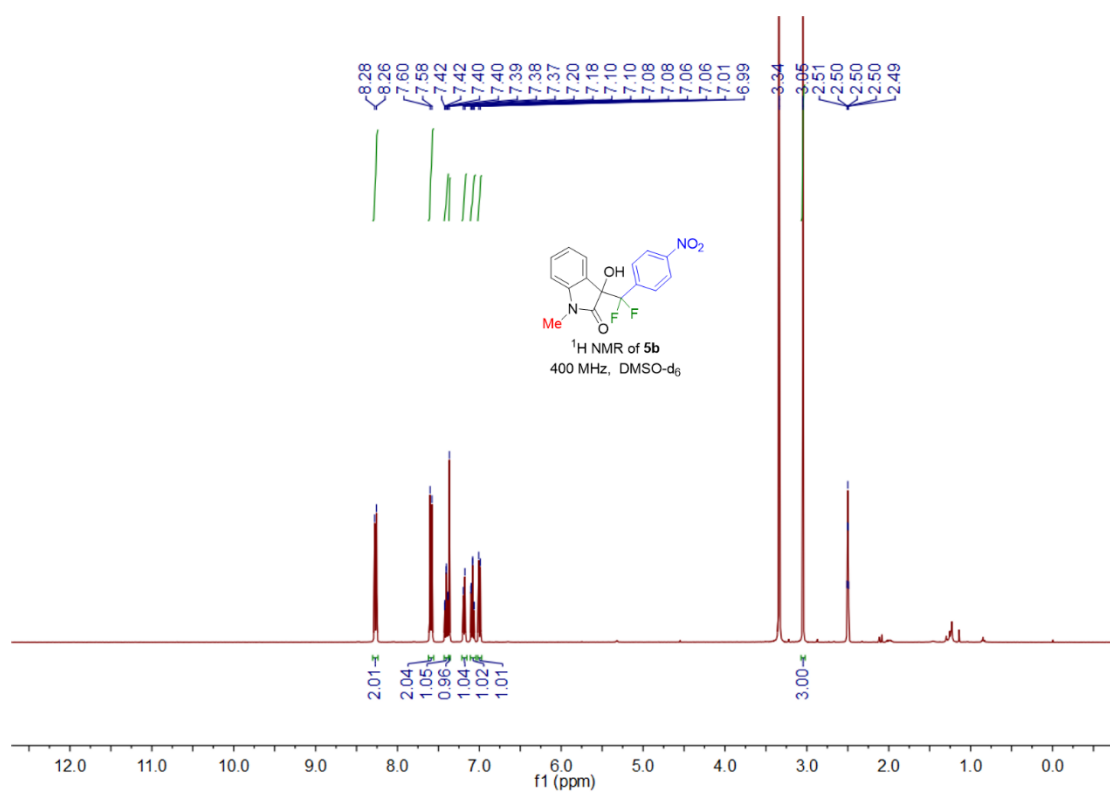

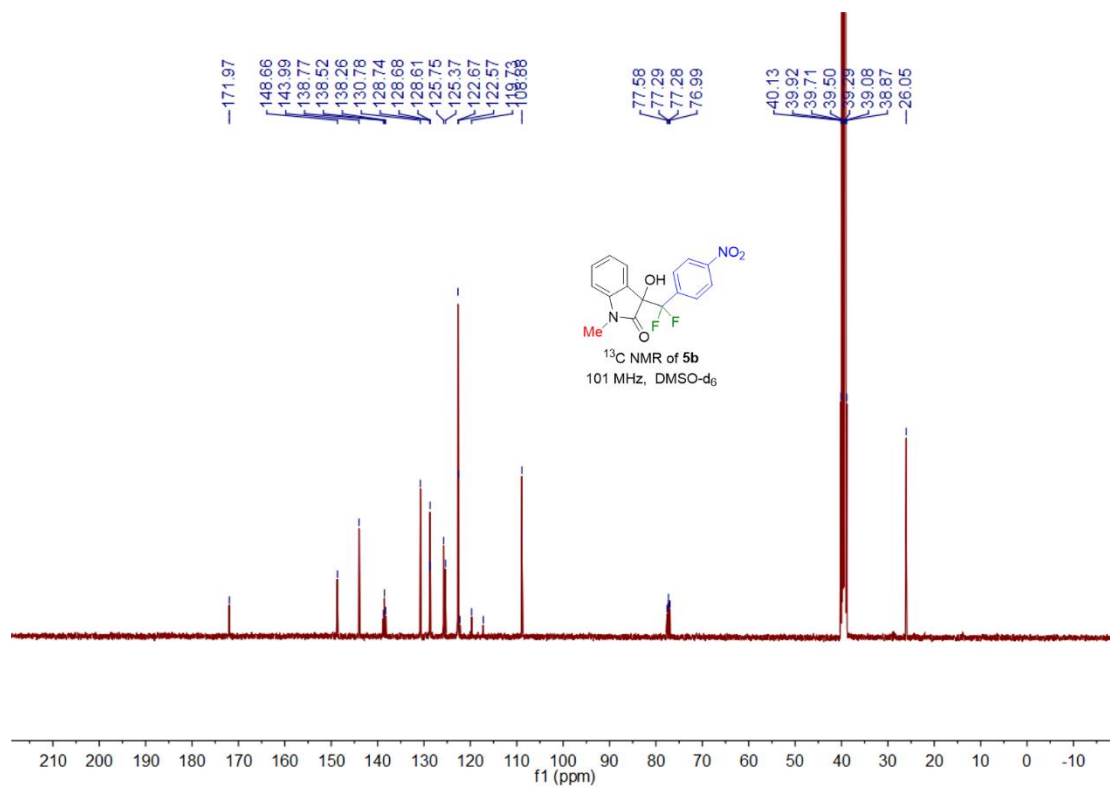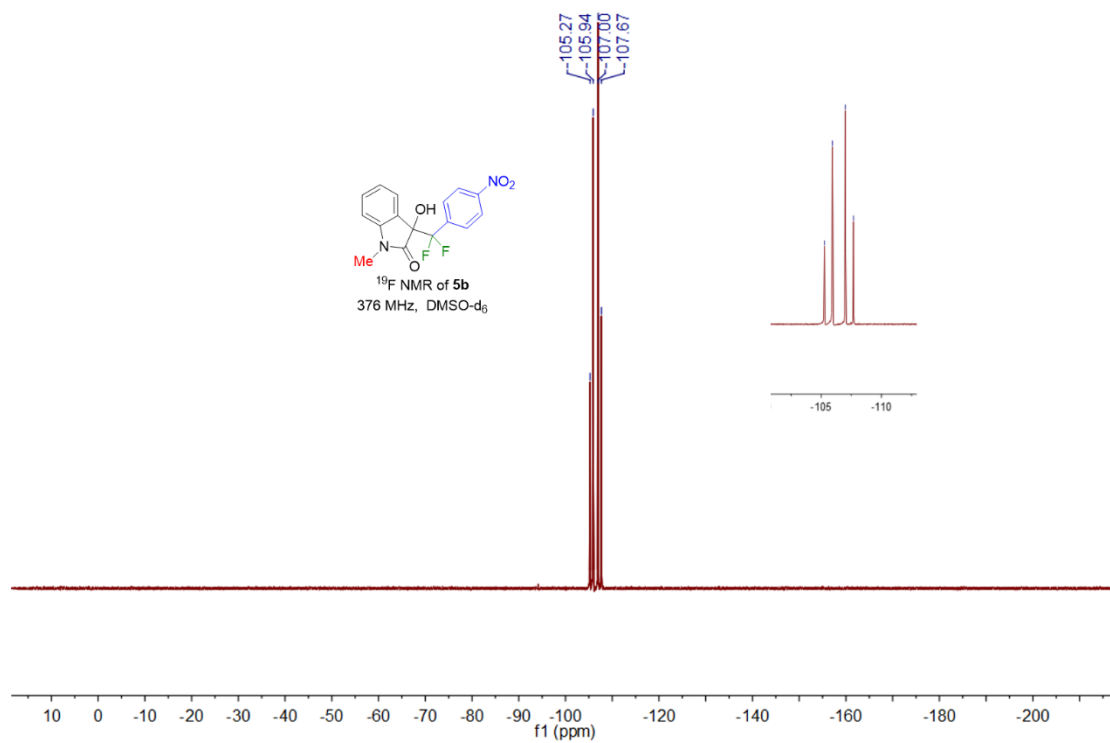



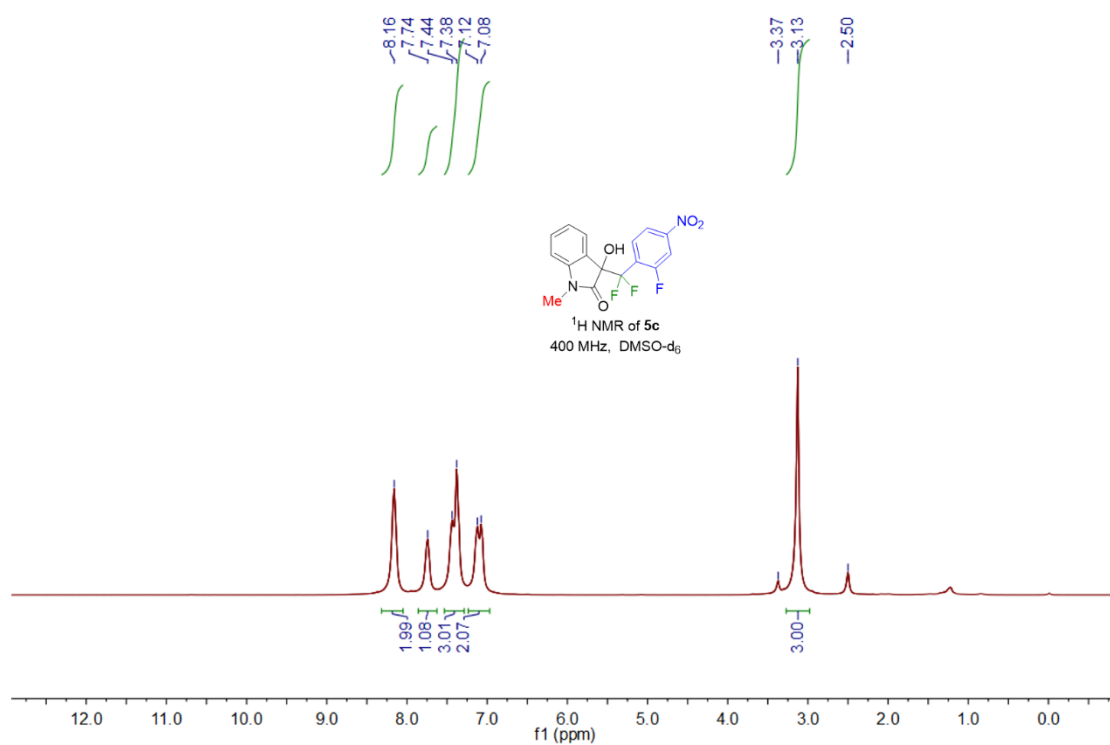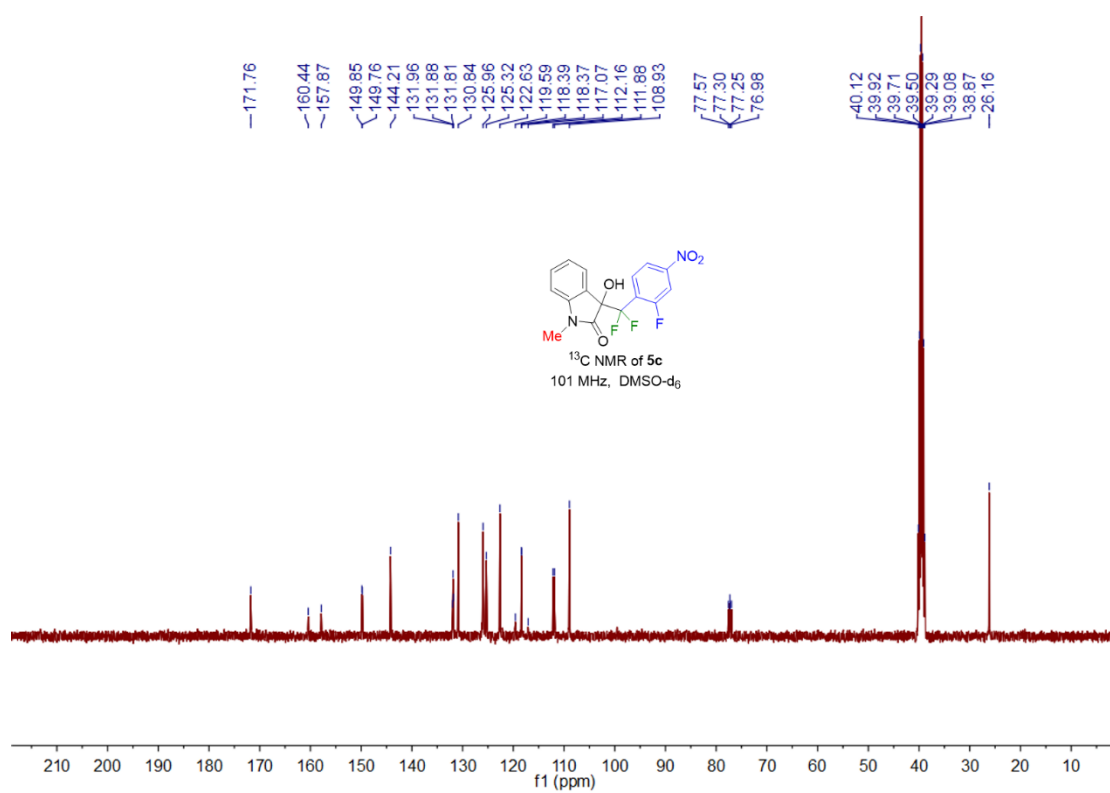

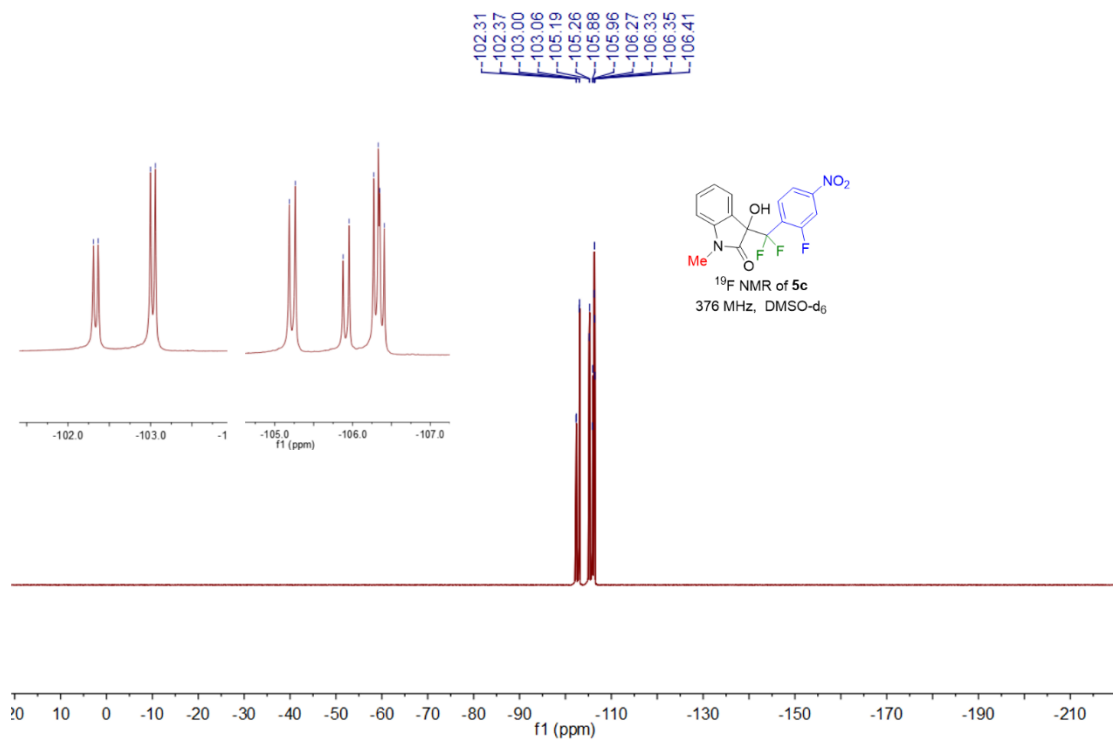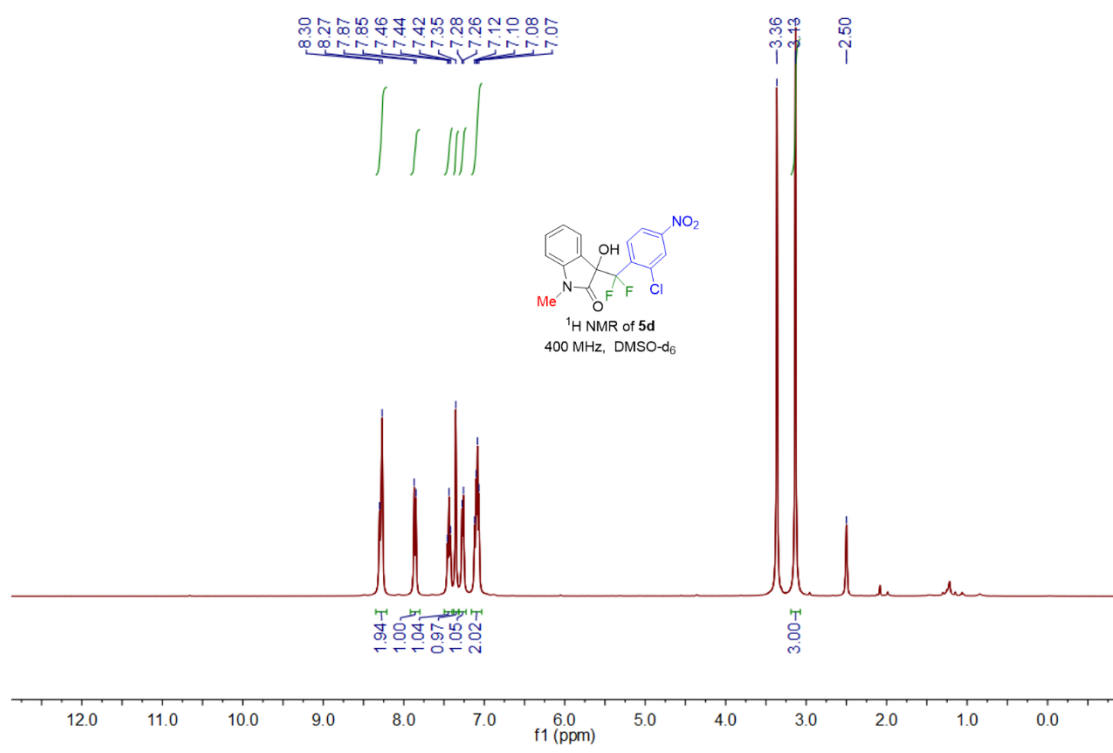

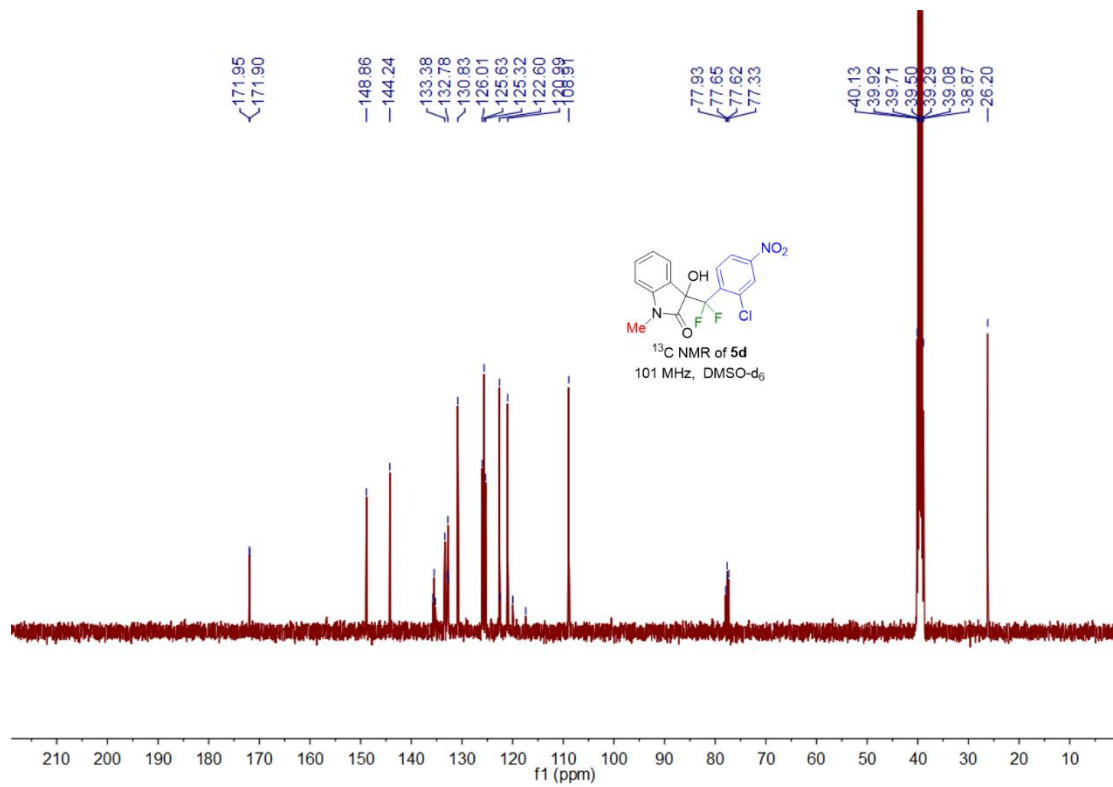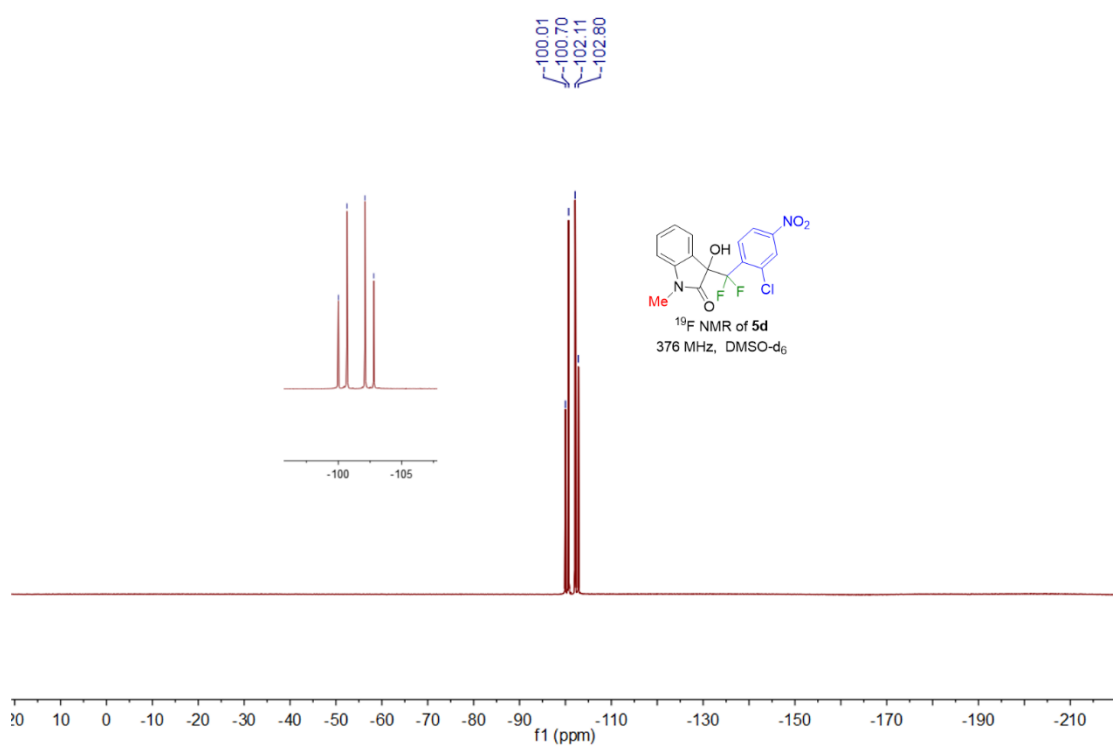

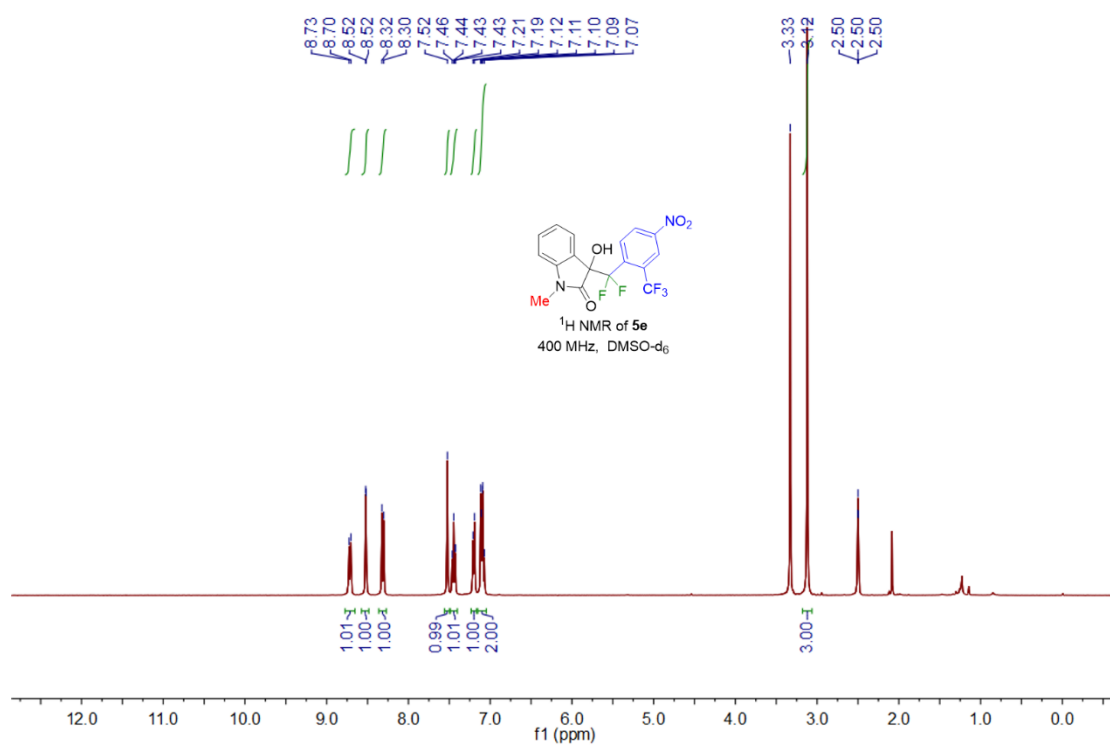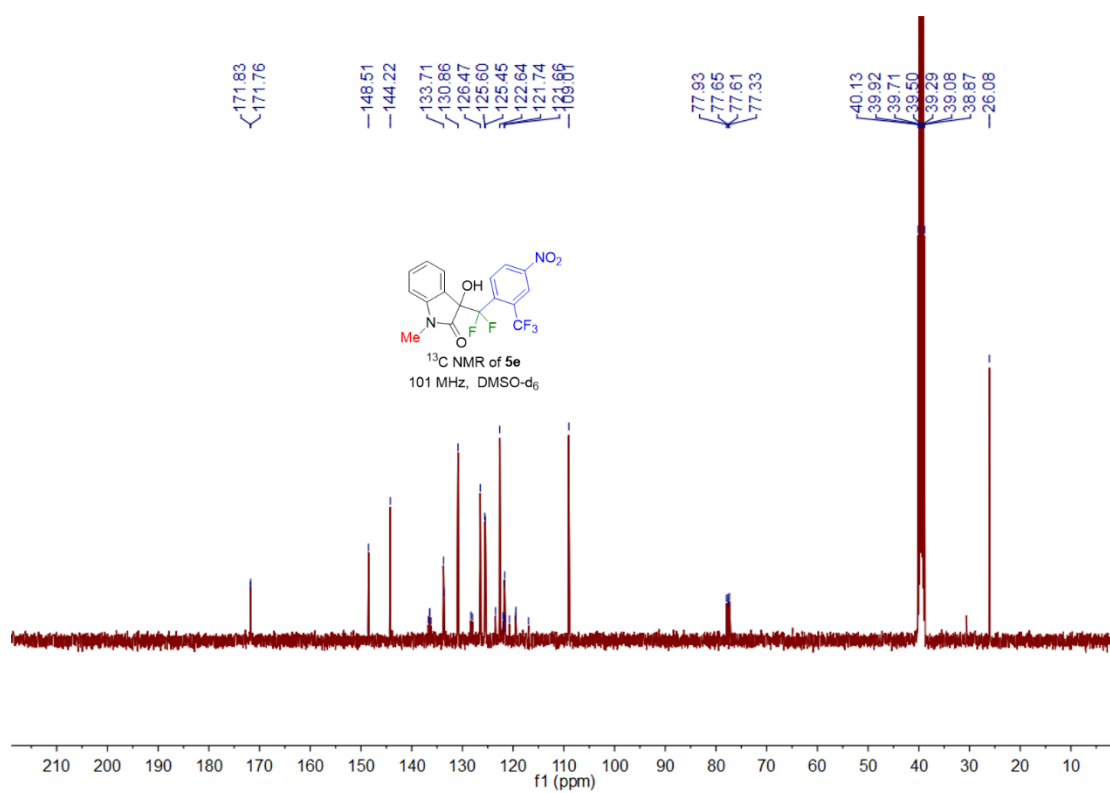

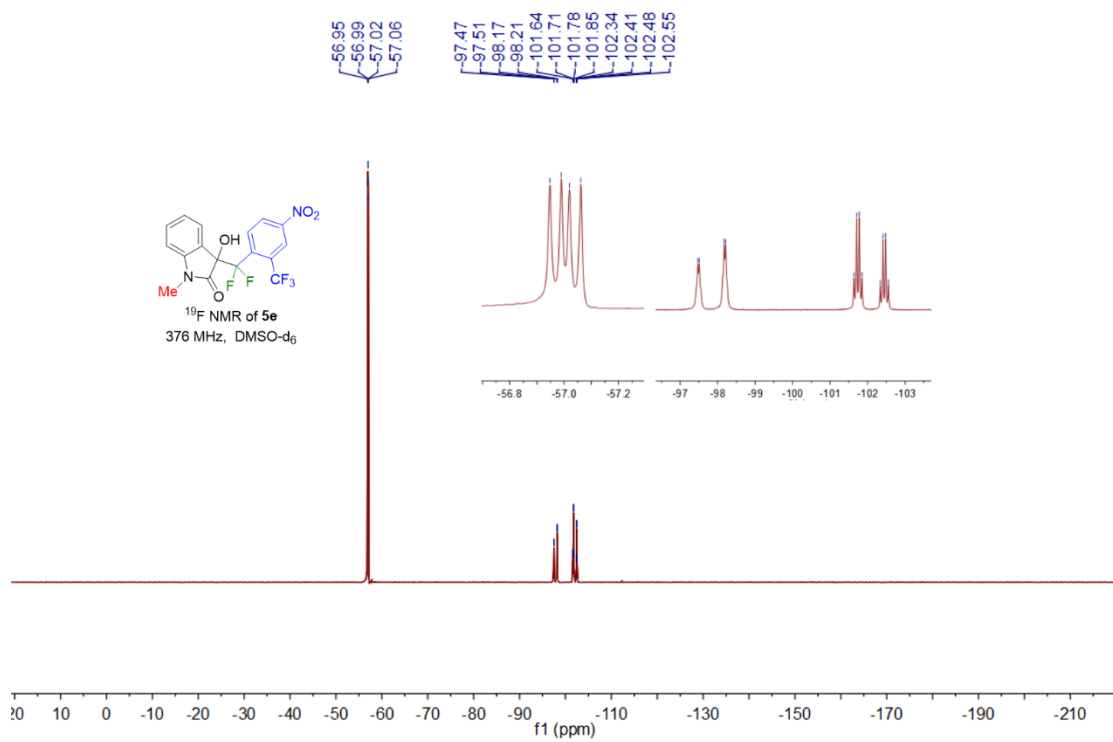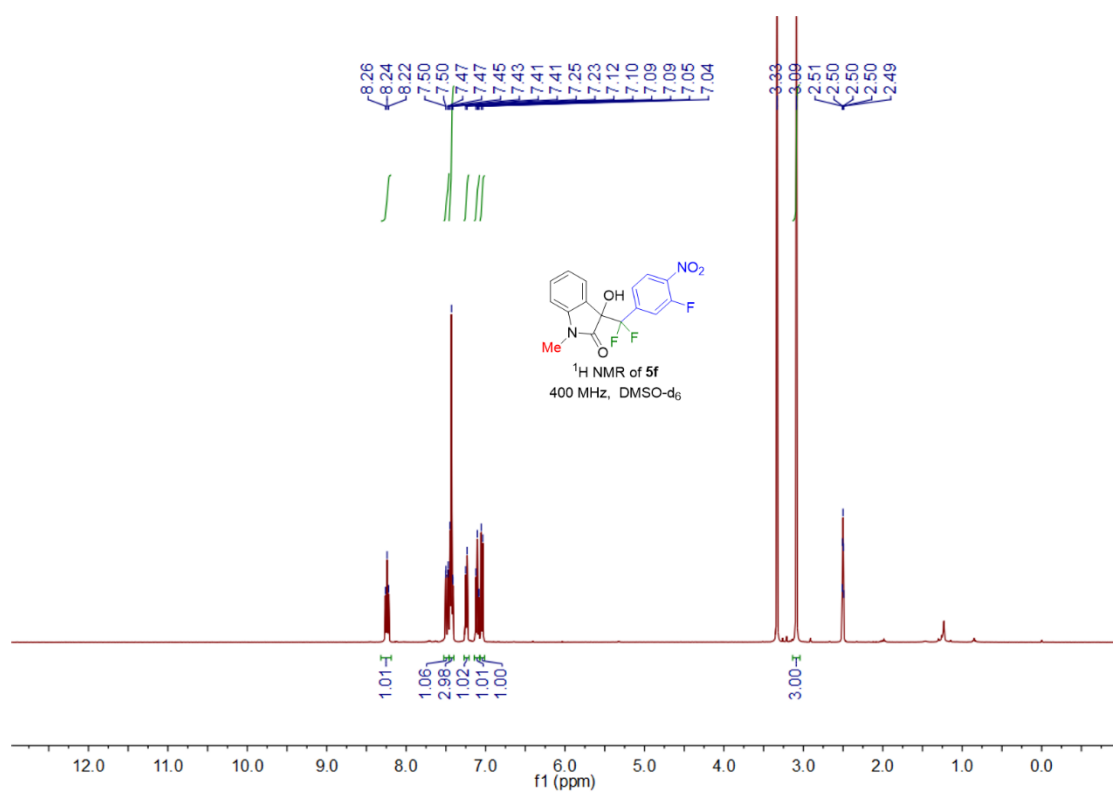

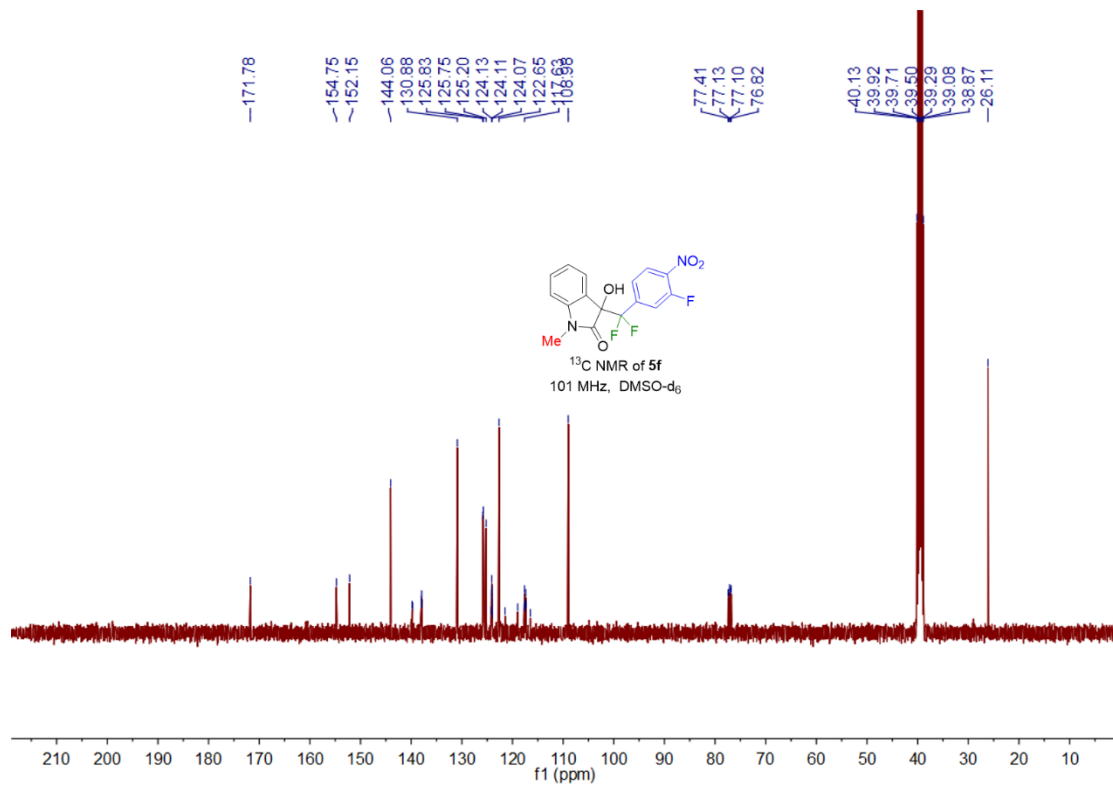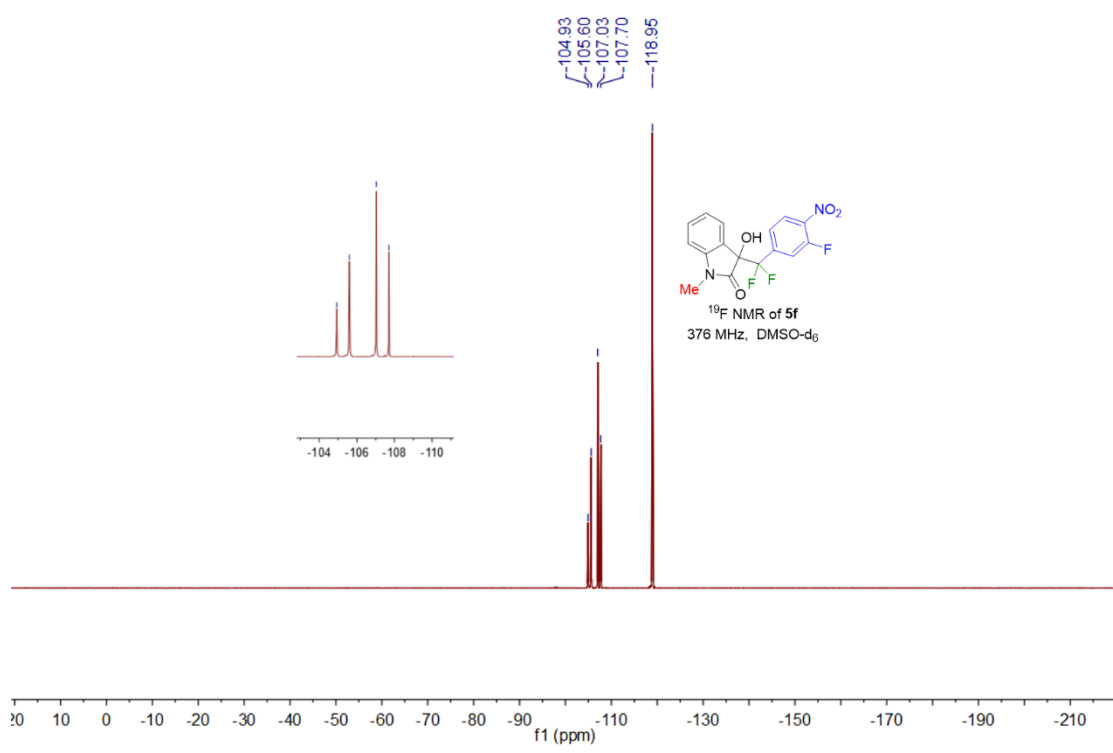

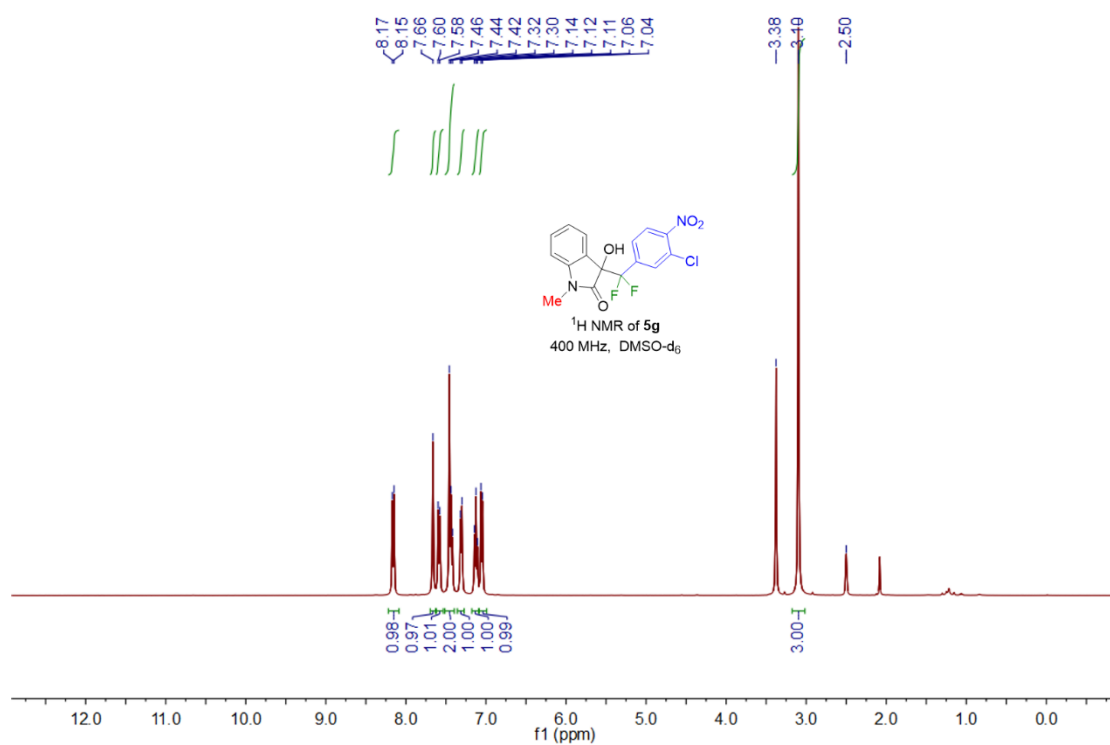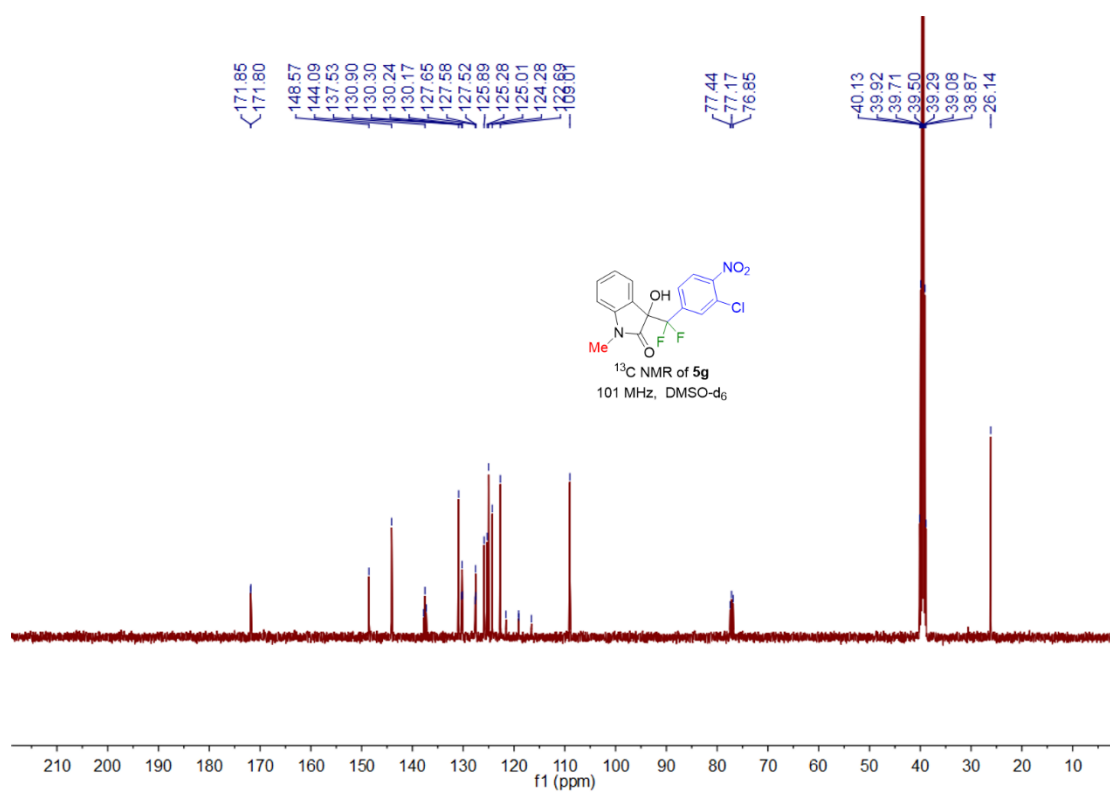

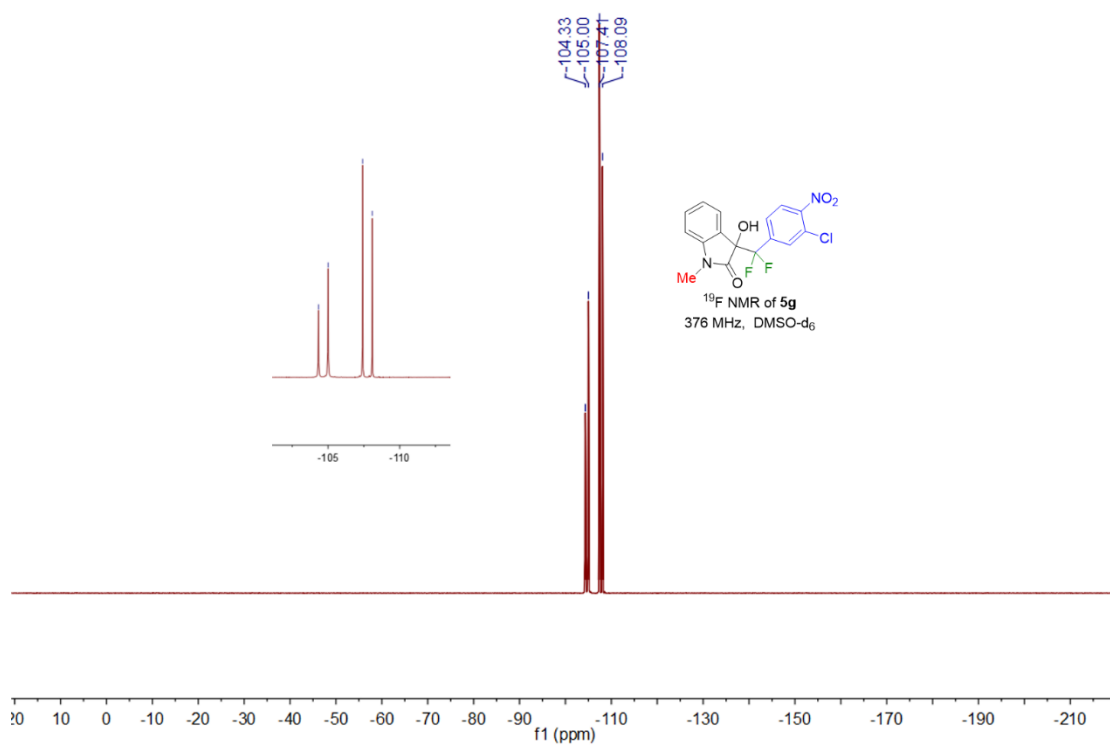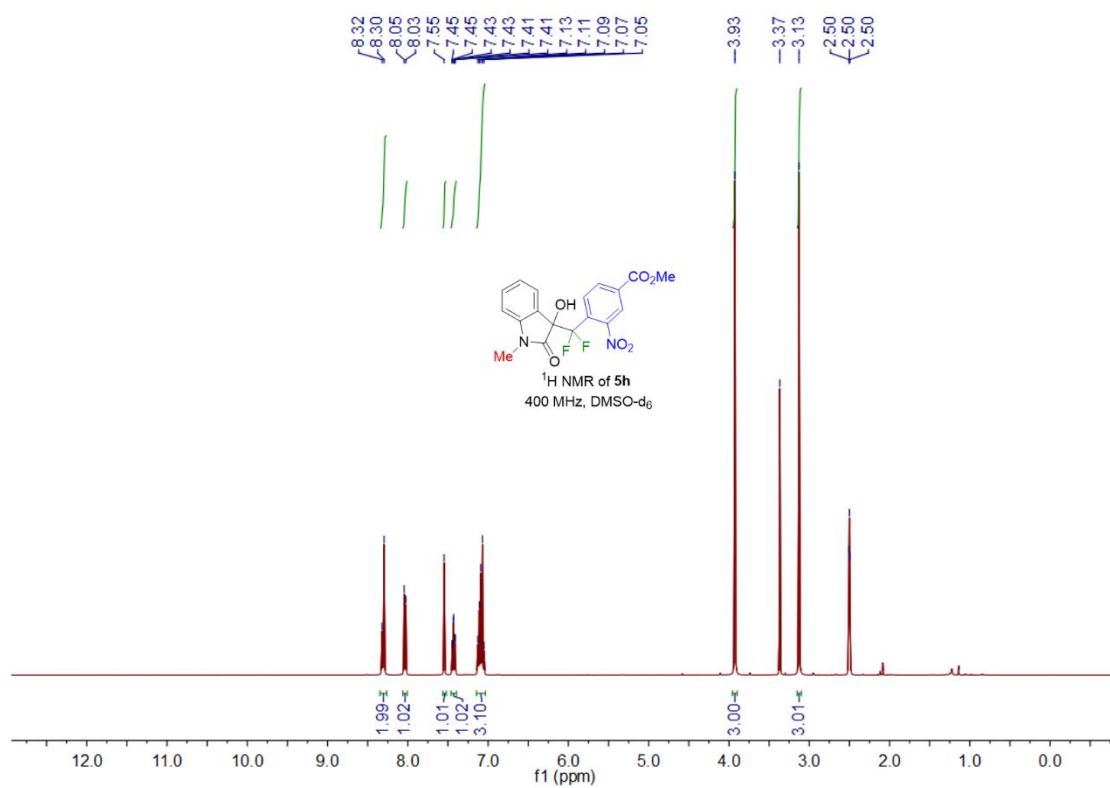



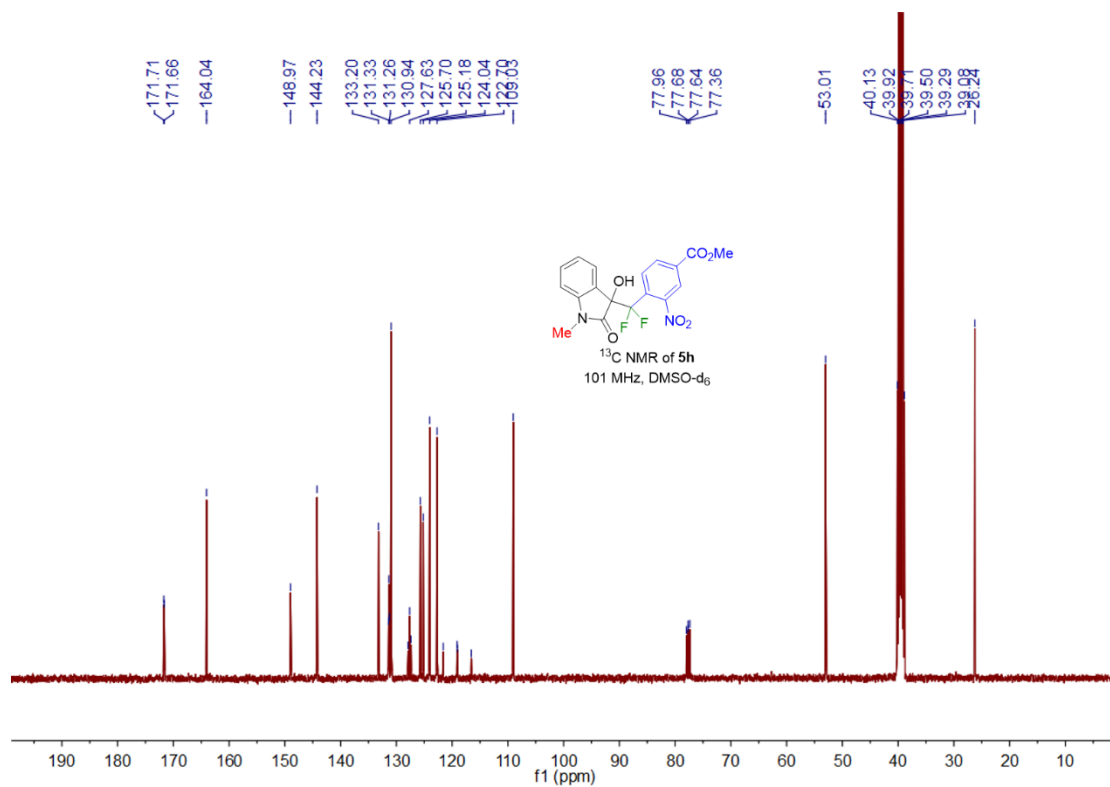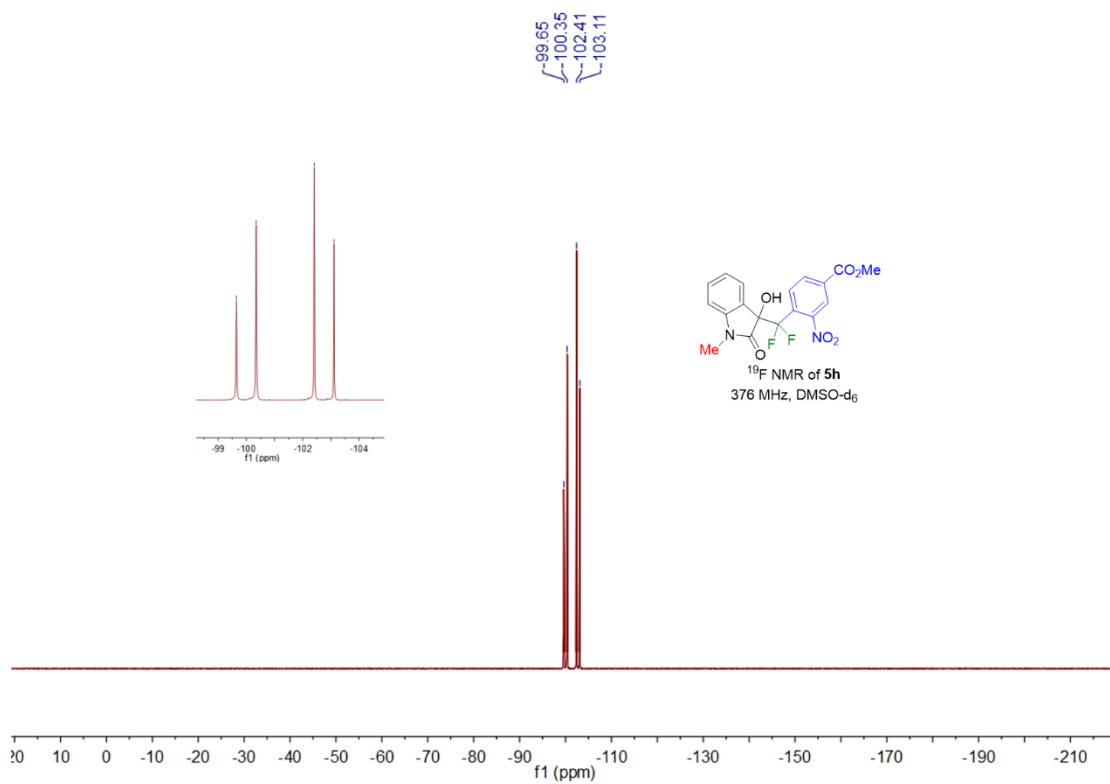

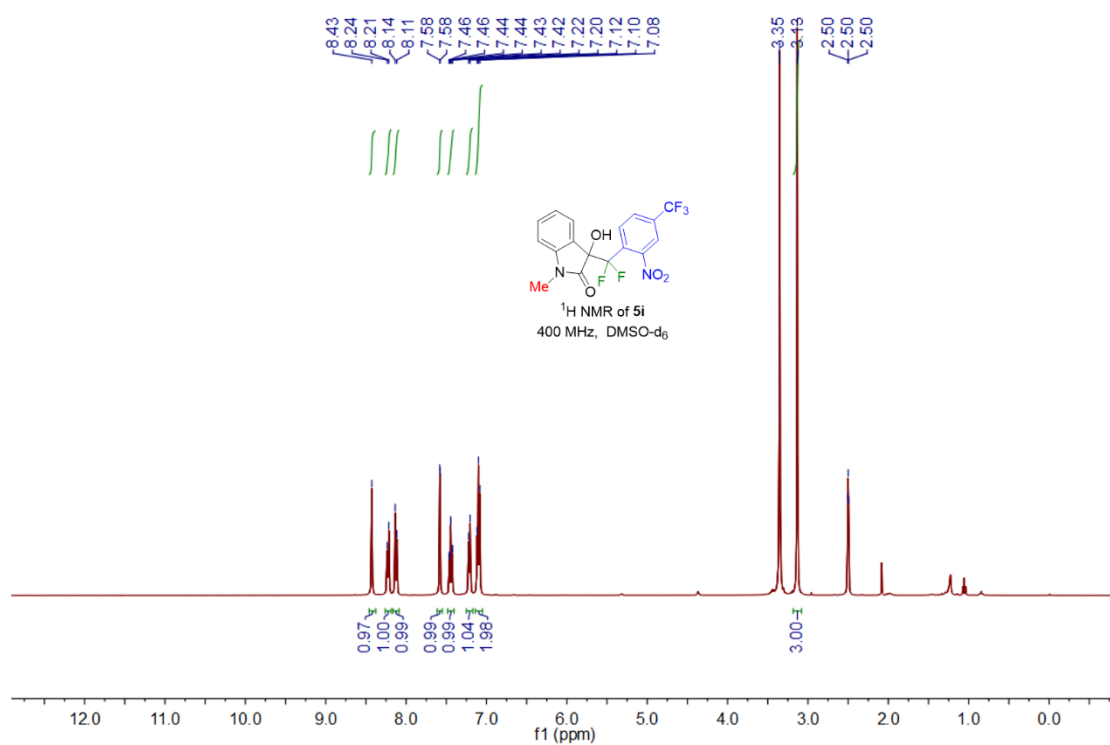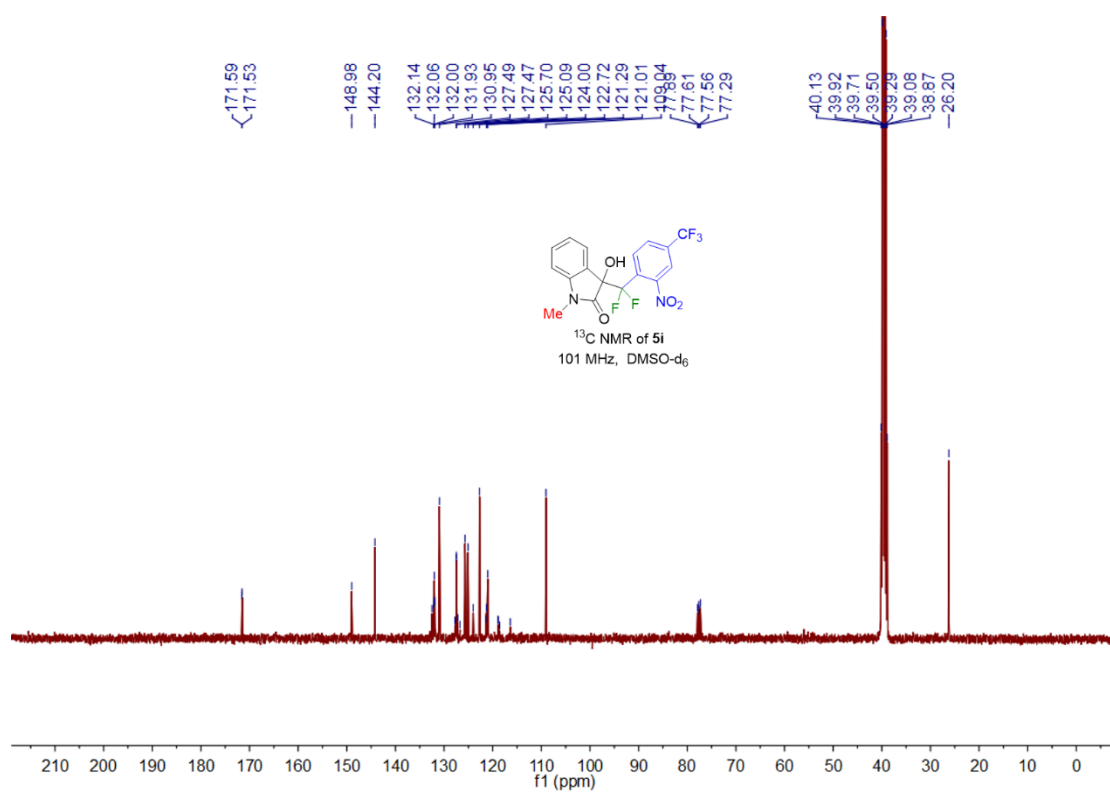

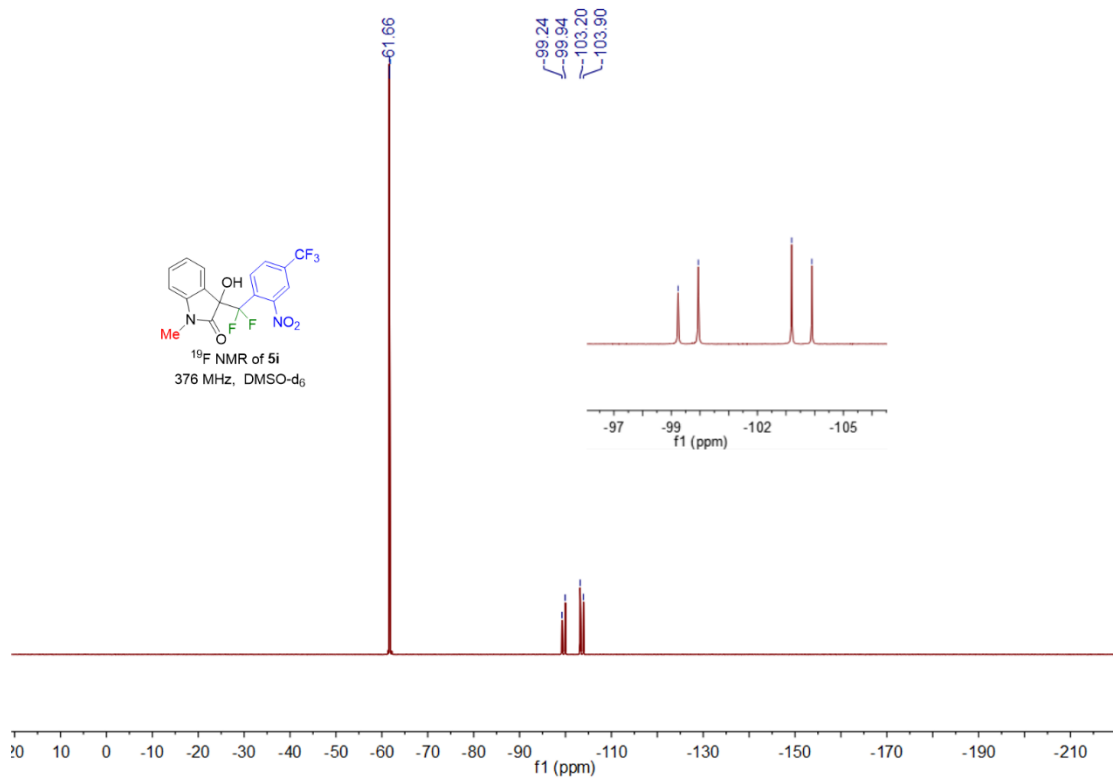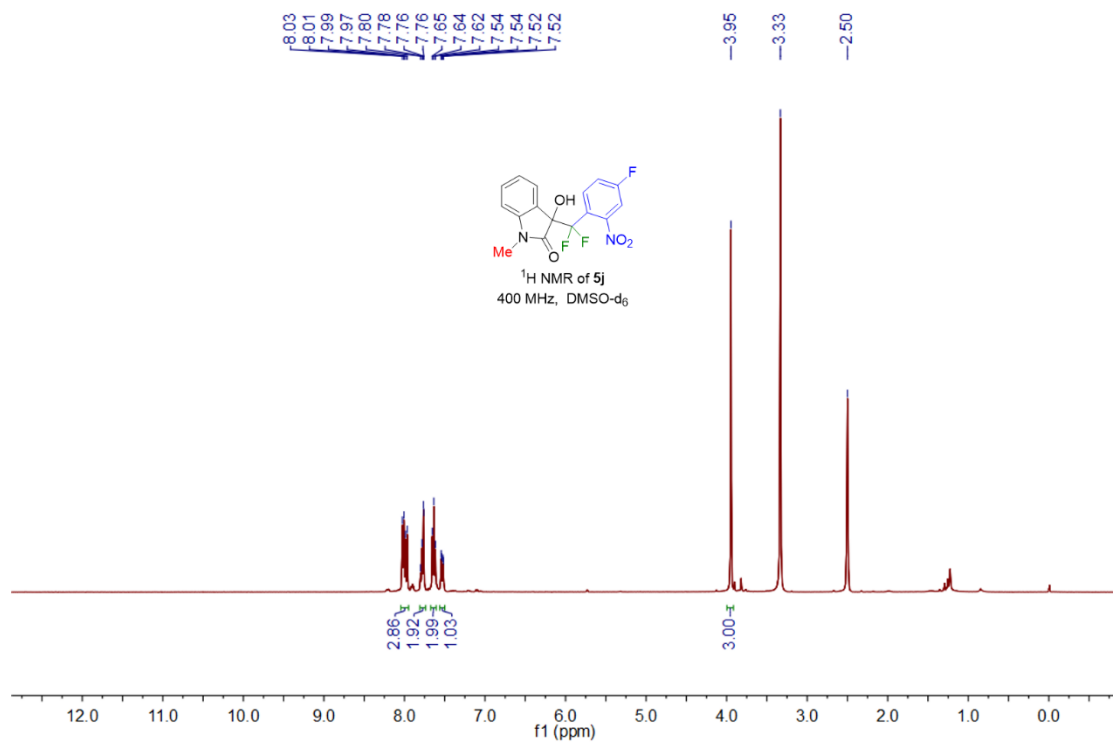

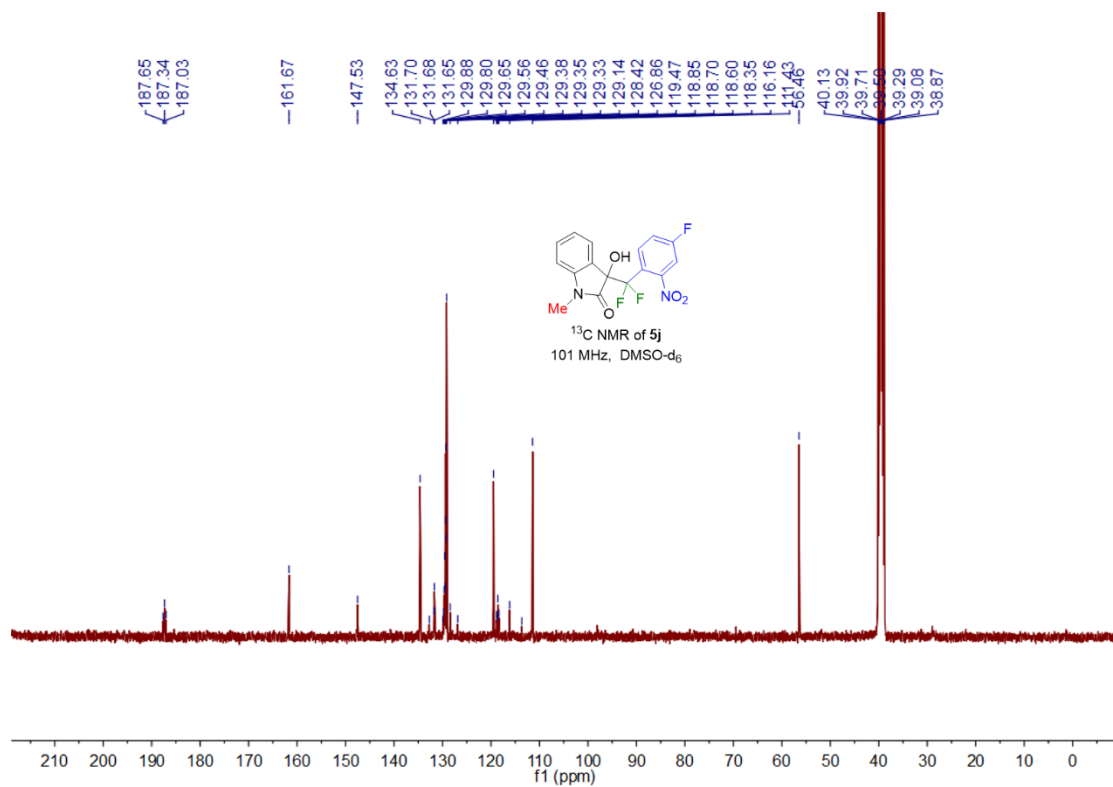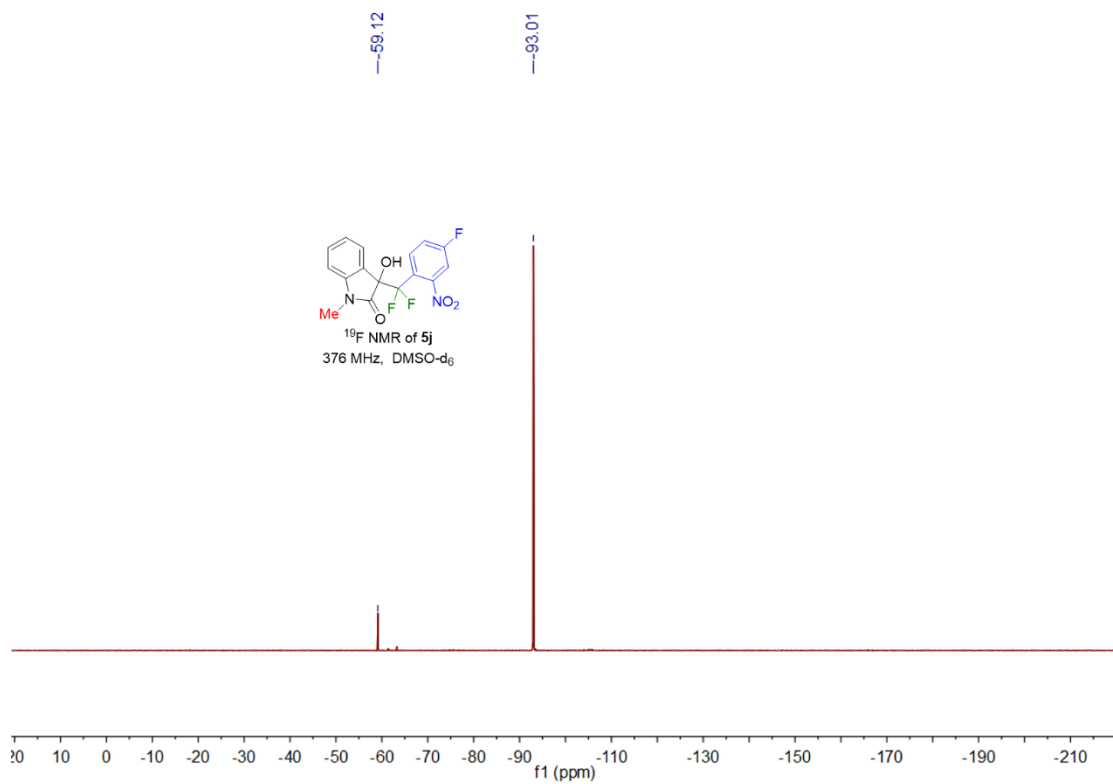

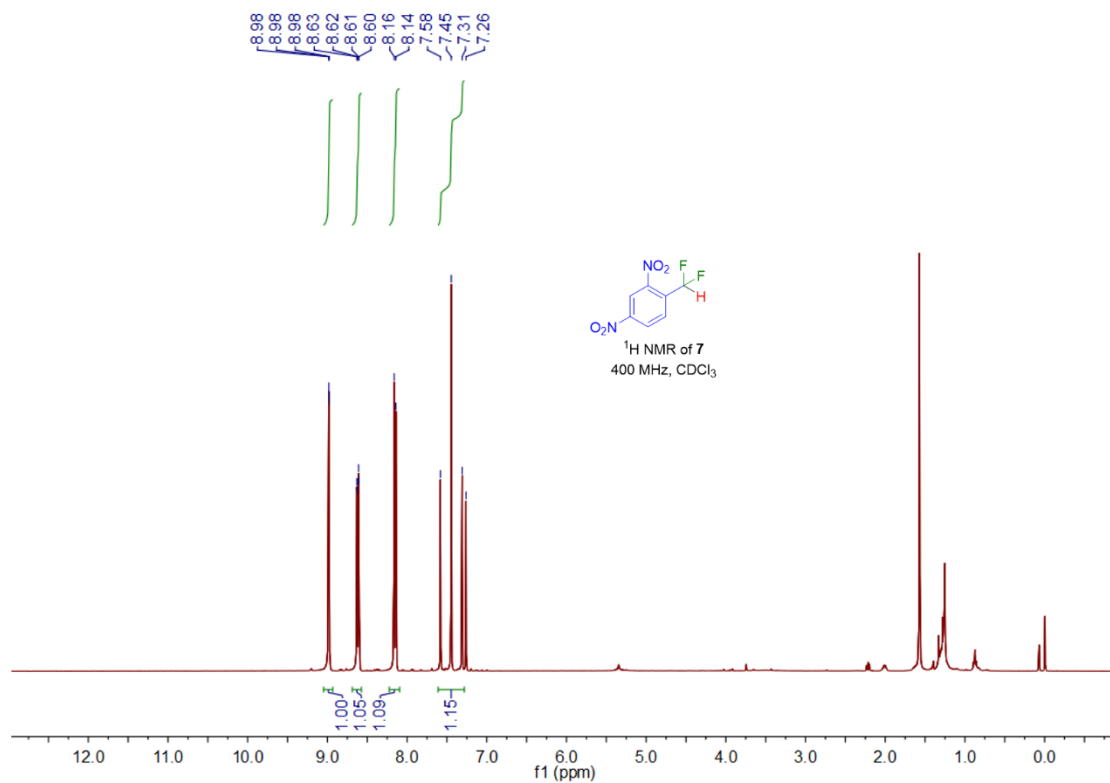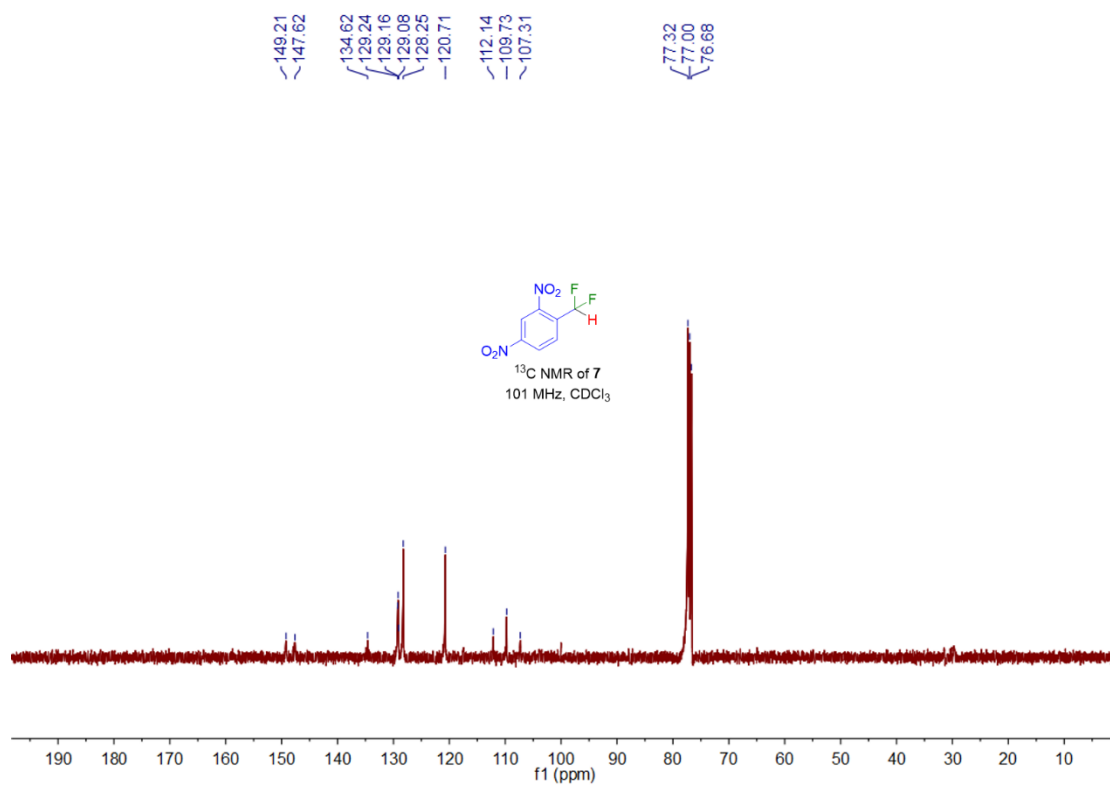

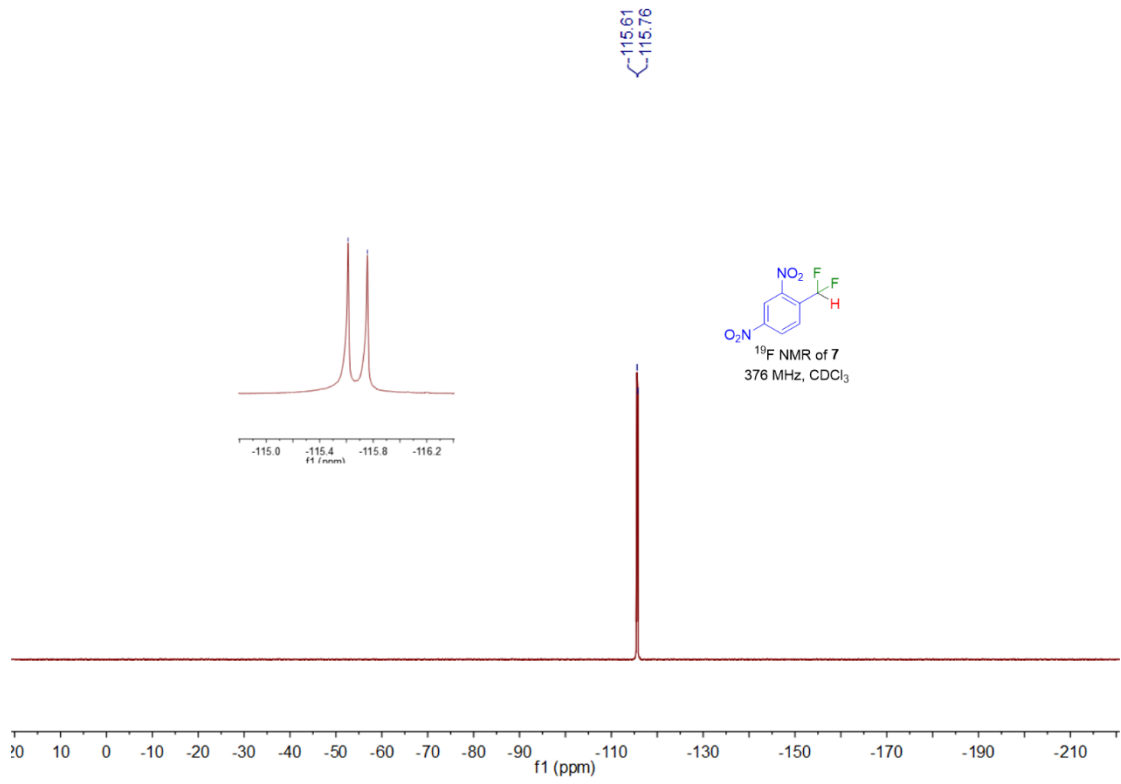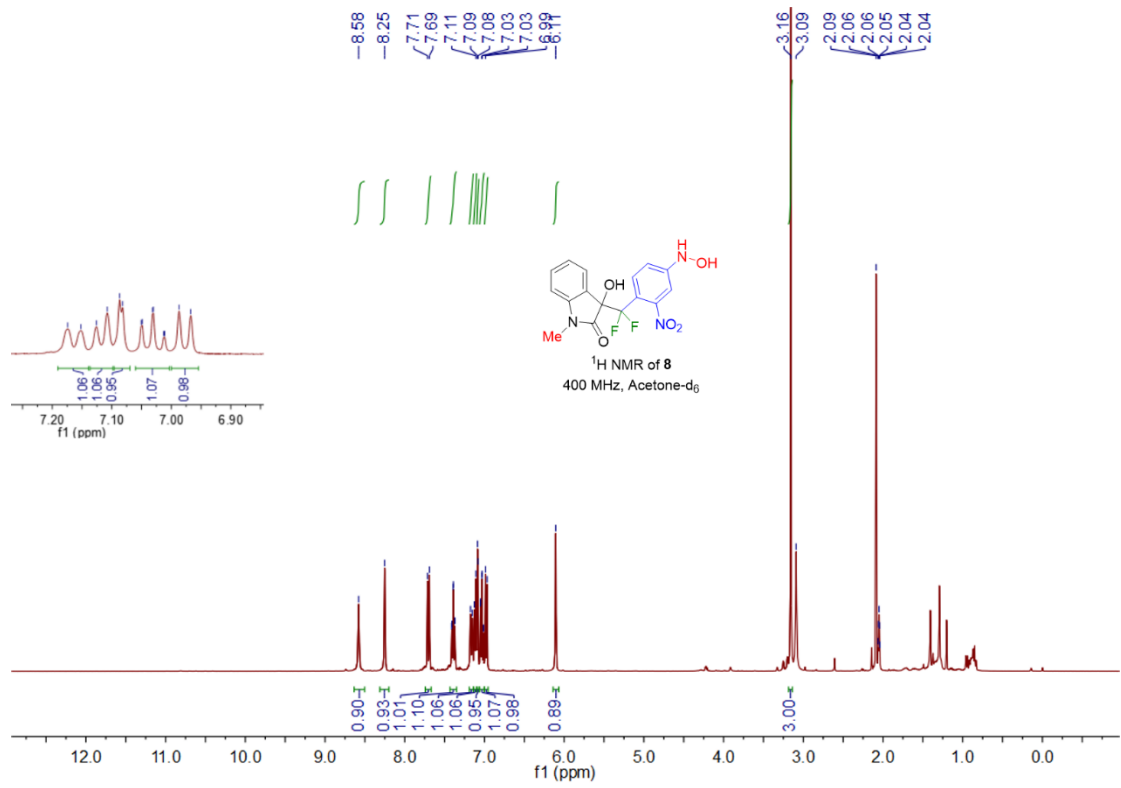

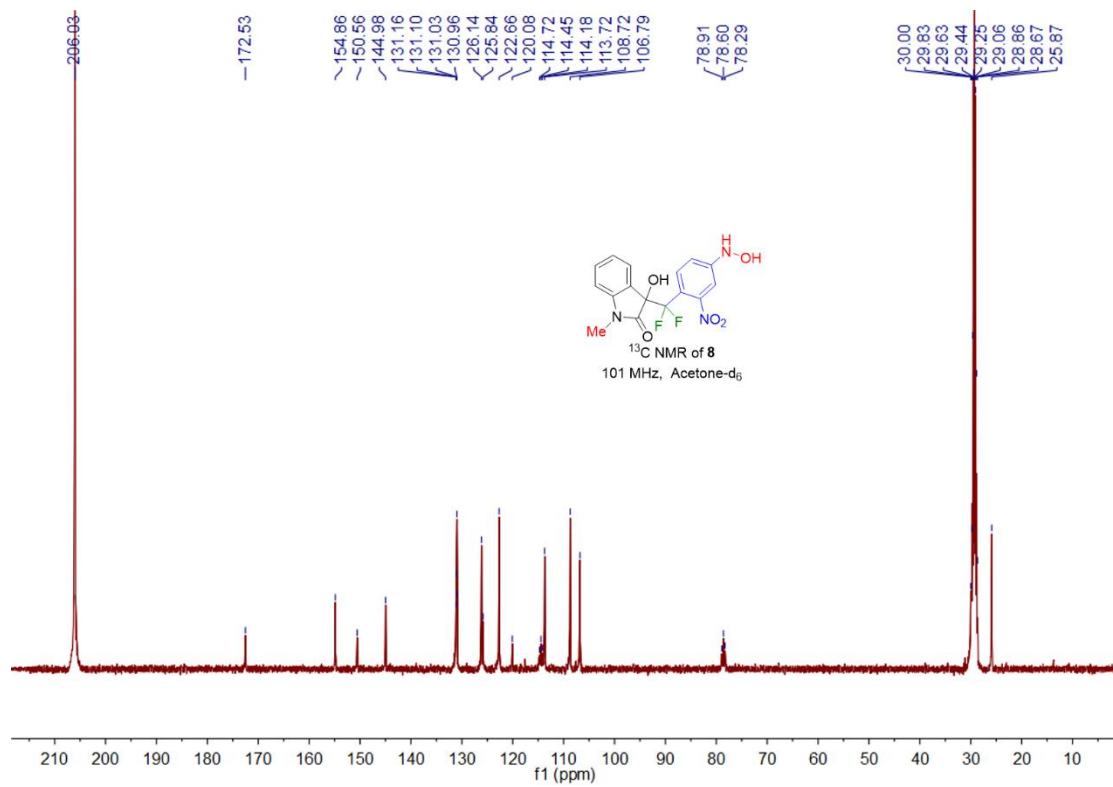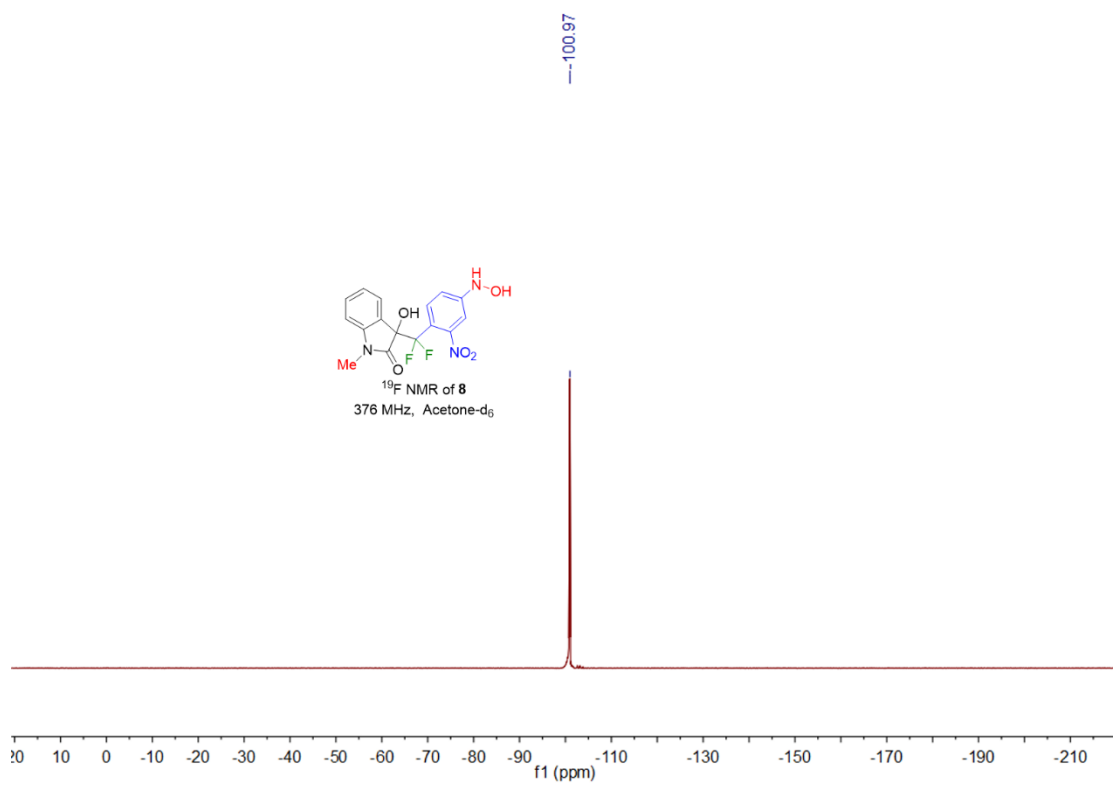

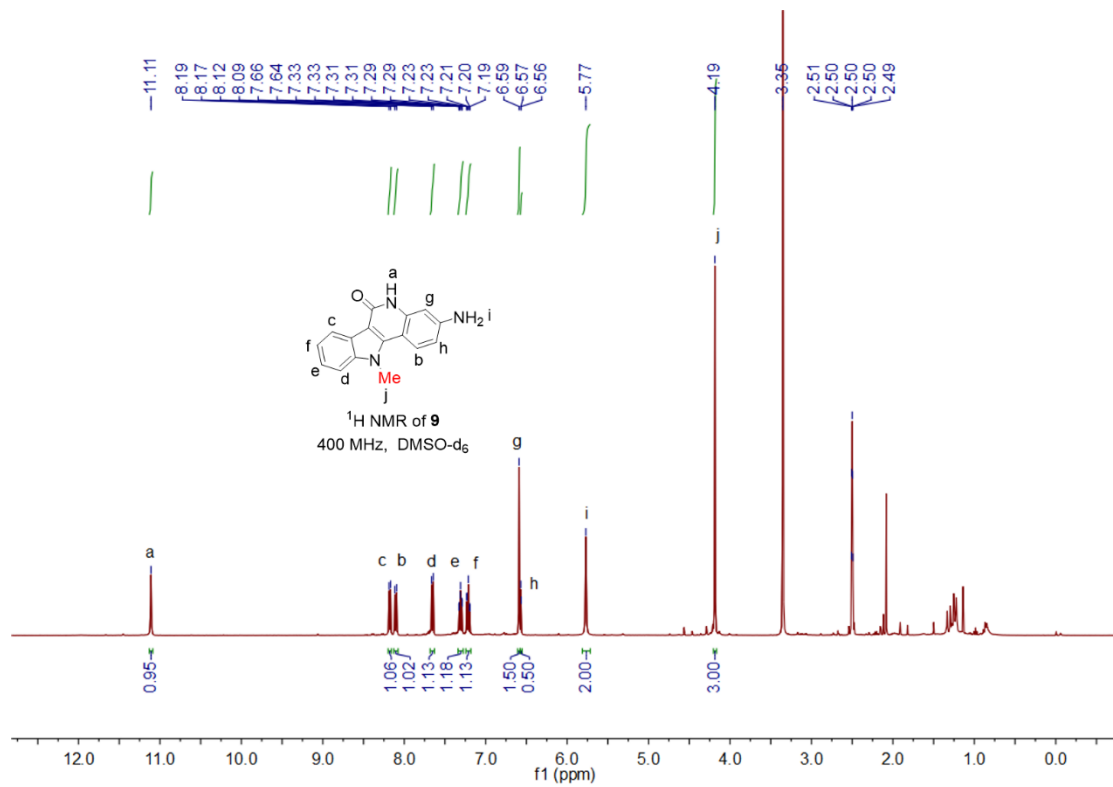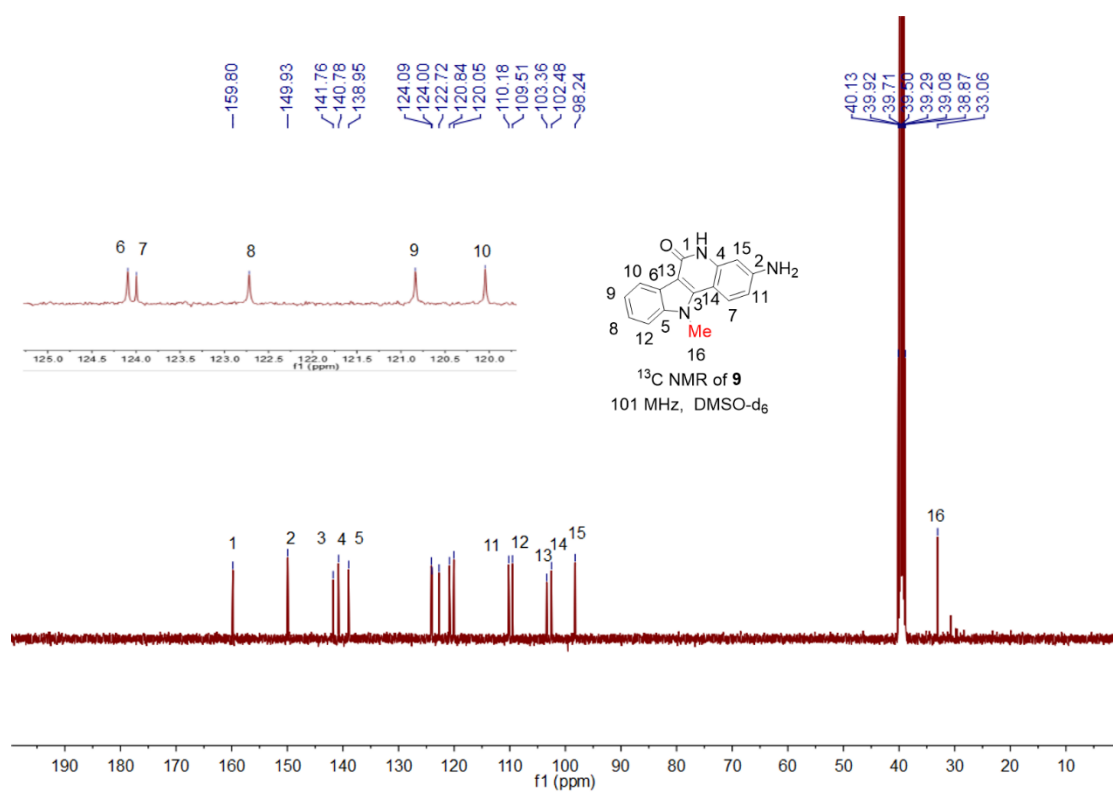



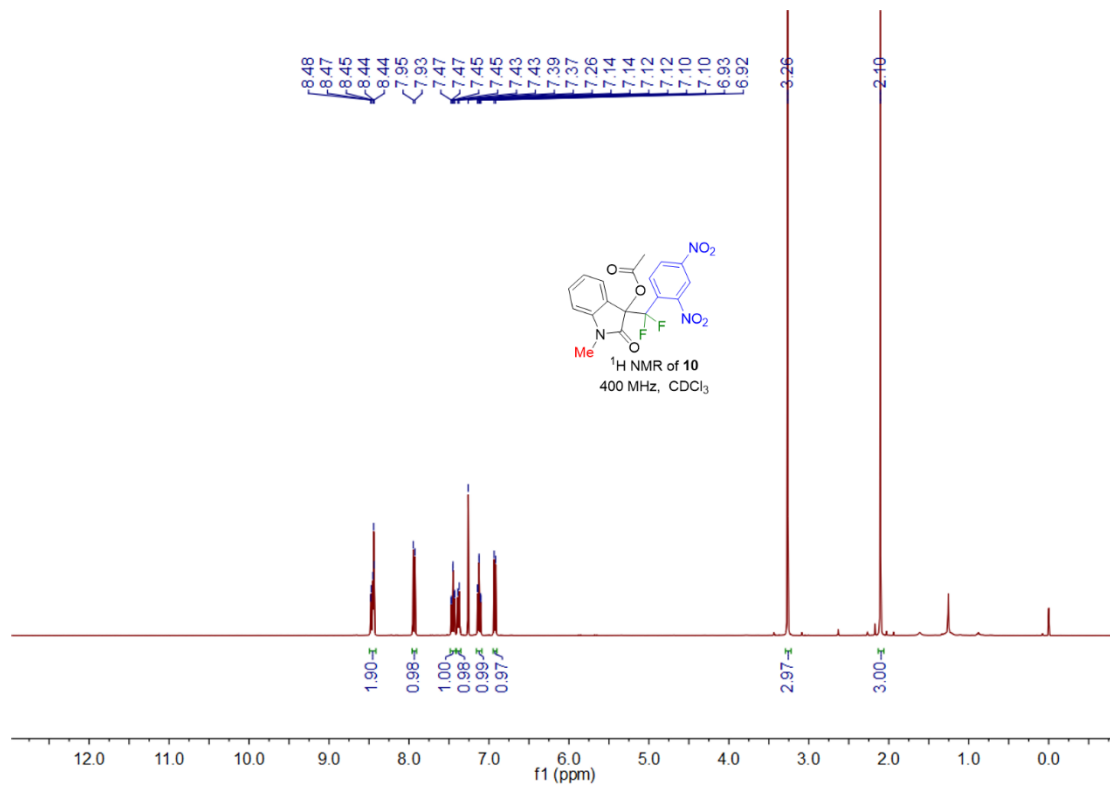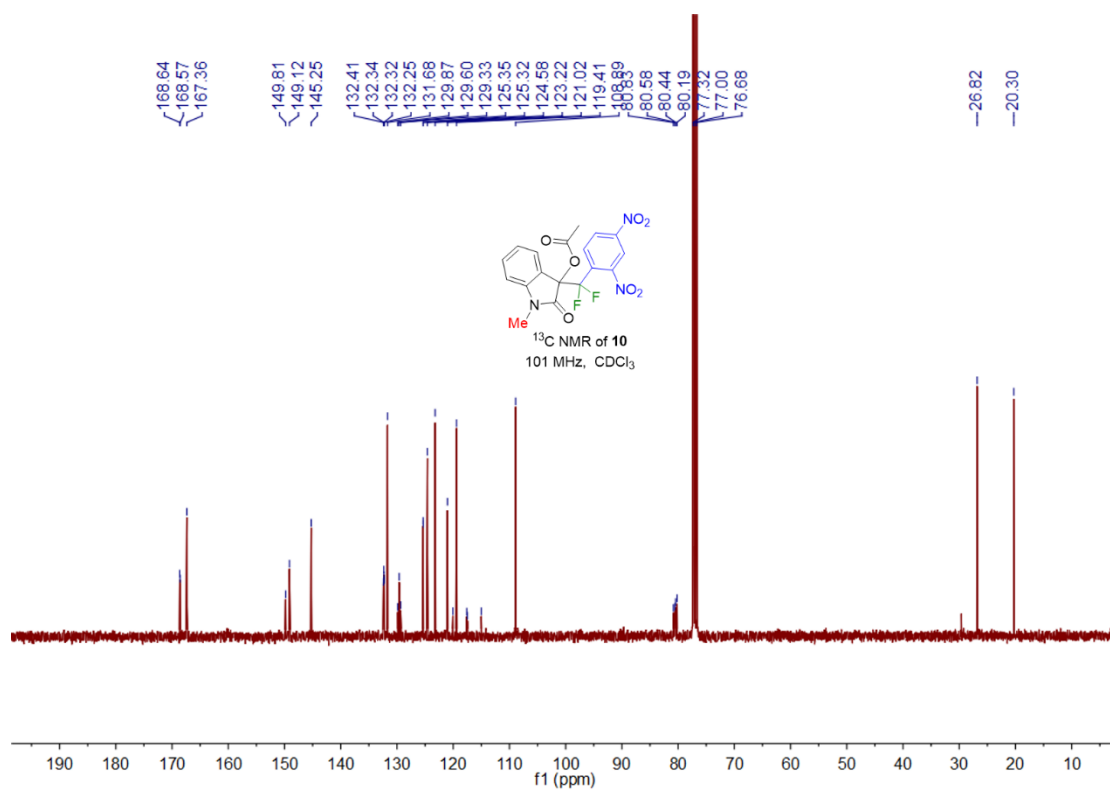

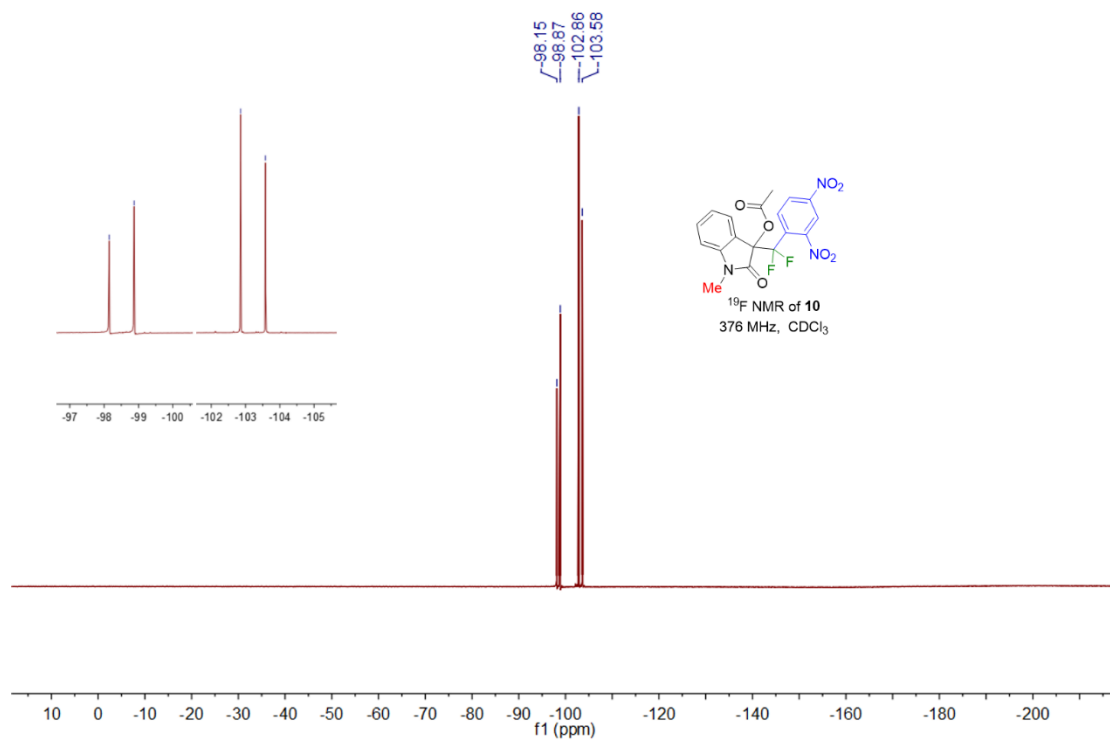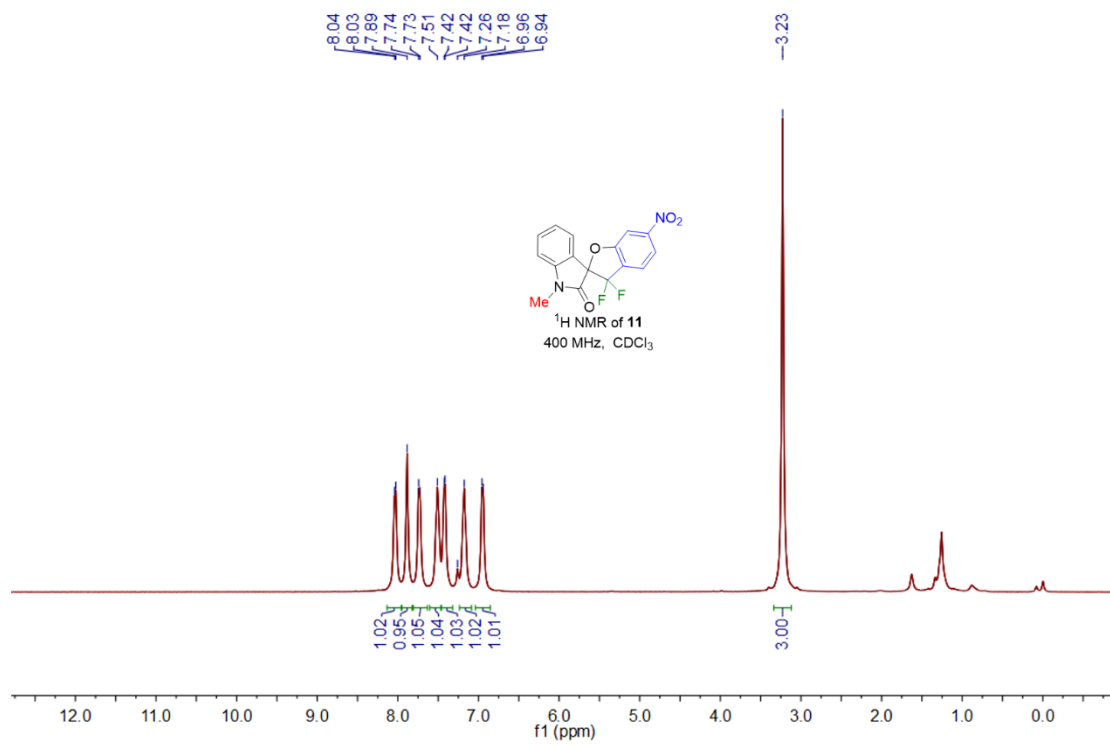

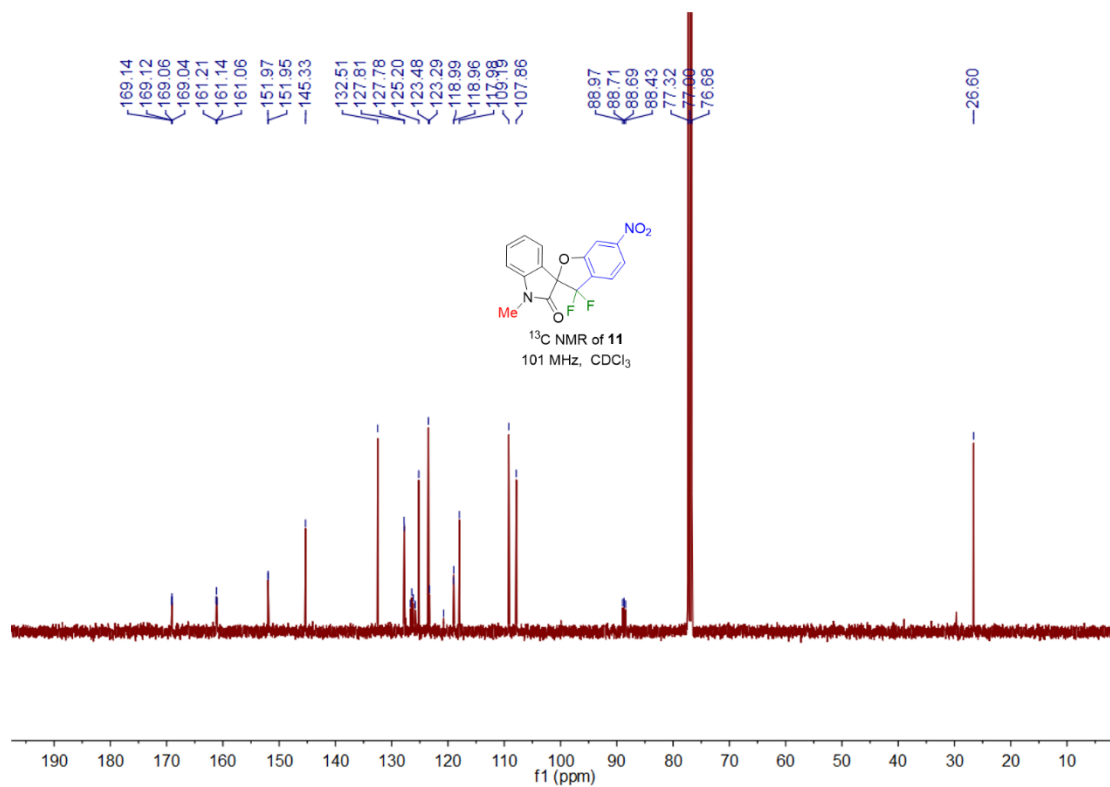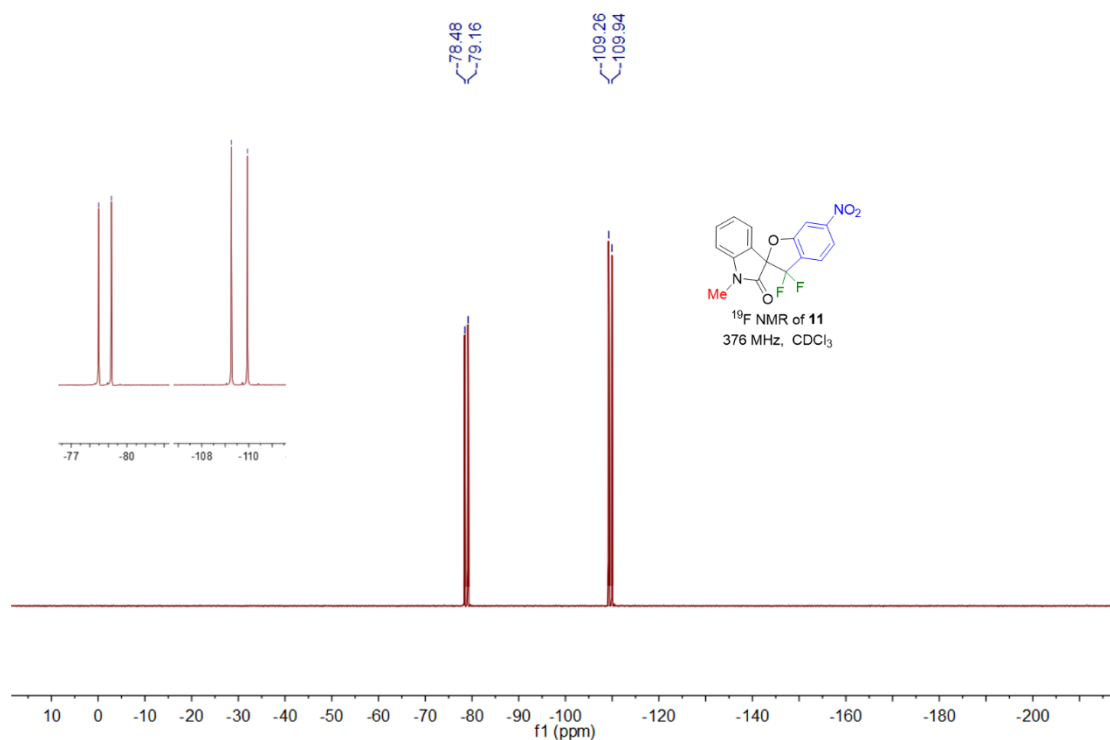

Supplement: d1qo01645h1.pdf [file d1qo01645h1.pdf]
